# Supplementary material for: Association between Legionella species and humic substances during early summer in the northern Baltic Sea
Source: Frontiers journal article supplement (doi:10.3389/fmars.2022.1070341), 2023-01-23
Supplement: Data_Sheet_2.xlsx [file Data_Sheet_2.xlsx]

## Sheet: Environmental data
SampleID.x	Description	SampleID.x	Station	Grouping	Location	Seccidepth..m.	Temperature..ºC.	Salinity..psu.	pH	Total.N...M.	Total.P...M.	DOC...M.	Humus...g.l.	BactGrowth.µg.C.dm..3.day..1.	Chl.a..mg.m..3..mean
16.3	A13	16.3	A13	Offshore_North	North	4.5	5.772	2.917	7.94	17.21	0.18	348	14.8	3.12	3.365
16.4	A5	16.4	A5	Offshore_North	North	3.5	7.256	2.679		19.28	0.28	398	19.1	3.24	2.945
16.2	B3	16.2	Örefjärden	Coast_South	South	2.5	9.729	3.896	8.03	16.71	0.41	425	22.2	9.48	3.445
16.Blank	Blank	16.Blank	Blank	NA	NA	NA	NA	NA	NA	NA	NA	NA	NA	NA	NA
16.7	C14	16.7	C14	Coast_South	South	4.5	8.934	4.933		14.28	0.26	333	10.3	4.92	2.56
16.8	C24	16.8	C24	Offshore_South	South	5.5	9.905	5.259	8.3	16.63	0.32	338	8.4	5.64	1.69
16.9	C3	16.9	C3	Offshore_South	South	6	9.036	5.122	8.31	14.99	0.3	326	9.3	3	2.085
16.13	F1F2	16.13	Filterblank	NA	NA	NA	NA	NA	NA	NA	NA	NA	NA	NA	NA
16.1	GA1	16.1	Gavik	Coast_South	South	6.5	6.785	5.014	8.24	14.99	0.29	329	10.5	3.84	1.99
16.12	PK10	16.12	Poscont	NA	NA	NA	NA	NA	NA	NA	NA	NA	NA	NA	NA
16.10	PK8	16.10	Poscont	NA	NA	NA	NA	NA	NA	NA	NA	NA	NA	NA	NA
16.11	PK9	16.11	Poscont	NA	NA	NA	NA	NA	NA	NA	NA	NA	NA	NA	NA
16.5	RA1	16.5	Råneå1	Coast_North	North	1	14.84	0.515	7.25	23.42	0.41	637	51.5	16.2	3.52
16.6	RA2	16.6	Råneå2	Coast_North	North	2	12.617	1.599	7.62	19.42	0.26	458	29.3	11.16	2.66

## Sheet: Illumina - Feature table
# Constructed from biom file	GA1	PK8	PK9	PK10	F1F2	B3	A13	A5	RA1	RA2	C14	C24	C3	Blank
#OTU ID	16.1	16.10	16.11	16.12	16.13	16.2	16.3	16.4	16.5	16.6	16.7	16.8	16.9	16.Blank
490f7022ae9936cc74482d629b706226	7248.0	44357.0	27848.0	26124.0	1526.0	19746.0	9923.0	9271.0	1155.0	4398.0	22042.0	25965.0	19826.0	0.0
84ea3564fd34c5377c4305b340f0c16f	13351.0	22329.0	16637.0	15685.0	1050.0	10577.0	26585.0	21486.0	6241.0	9738.0	23965.0	19198.0	17691.0	0.0
9cfa52be027c8fa57d197b21dd7a958c	7893.0	9681.0	4960.0	6297.0	785.0	6763.0	15449.0	13965.0	1782.0	3394.0	14631.0	14016.0	19923.0	0.0
5afc2a9c279a0e72cb96fb88e116f994	6569.0	914.0	515.0	566.0	0.0	7371.0	2560.0	2598.0	2503.0	5325.0	30303.0	27394.0	26075.0	0.0
ab3c8788d244ad9a77a7a48ae03ad6d3	12519.0	2904.0	1875.0	2087.0	0.0	6689.0	3593.0	3119.0	737.0	1753.0	31311.0	16899.0	24133.0	0.0
304a41c1c7d84b9f7049e0cba0f63300	11204.0	673.0	405.0	389.0	0.0	8755.0	1838.0	1386.0	1228.0	2895.0	30458.0	23757.0	22144.0	0.0
cfb98993000a7864ecd250723d57b8db	4221.0	21210.0	11582.0	11615.0	474.0	13251.0	7765.0	5580.0	237.0	517.0	3983.0	15494.0	5405.0	10.0
3f456a18968cea5c5e549e281f0f5808	5771.0	6528.0	3702.0	4937.0	244.0	6835.0	13556.0	12845.0	9208.0	10032.0	10376.0	7906.0	8462.0	0.0
81703e7ea9070f5db356c359ddd4731e	5773.0	3005.0	1674.0	2137.0	519.0	9643.0	7038.0	6596.0	13640.0	6374.0	9556.0	9495.0	8762.0	0.0
330511b25fce830f4ad4b90a0e70a290	1519.0	8266.0	5020.0	4889.0	454.0	12062.0	14409.0	10026.0	0.0	46.0	3853.0	12191.0	5709.0	0.0
5f510cf434513fffae3da23d8a55ced4	8761.0	387.0	202.0	192.0	0.0	2904.0	0.0	0.0	0.0	0.0	14049.0	10637.0	37640.0	0.0
b96ea0d3eaa1a062c1e8411c138f7e28	4303.0	12423.0	8596.0	7104.0	0.0	20881.0	6925.0	4020.0	73.0	105.0	2776.0	663.0	6149.0	0.0
6733f6b277ed40ca5dff3c82728ba9fc	1958.0	10881.0	6517.0	6922.0	720.0	2988.0	9014.0	10521.0	2325.0	6504.0	4037.0	4631.0	3463.0	0.0
4d65f65496c3d0238ebf74738245e526	953.0	11825.0	6755.0	7047.0	776.0	6452.0	14832.0	12269.0	219.0	860.0	1248.0	4400.0	2350.0	0.0
6267512d7ea98a0da430e5a6f96698e6	4977.0	1301.0	745.0	898.0	0.0	7374.0	3240.0	5129.0	8526.0	6280.0	9023.0	10304.0	9112.0	0.0
f34cdcd73e535507d29c29b19d01f658	181.0	11135.0	7544.0	6986.0	100.0	2266.0	7734.0	9781.0	7403.0	5462.0	483.0	231.0	445.0	0.0
7737a411e7f276fae1d2c38a6188f723	2541.0	11599.0	6891.0	6436.0	0.0	4260.0	1246.0	952.0	36.0	68.0	6856.0	7957.0	7820.0	0.0
9f5bf0bf0fa780be0b7ab197316e91c4	408.0	937.0	549.0	518.0	0.0	8537.0	517.0	3793.0	33327.0	7132.0	606.0	0.0	276.0	0.0
4fecdb809342a4fcf200afffd42ca2e3	1920.0	703.0	361.0	354.0	0.0	9295.0	5665.0	3730.0	1136.0	1241.0	5252.0	15983.0	7527.0	0.0
db87d8c209a9995704ccb38c98e0543e	5639.0	1700.0	1126.0	1096.0	0.0	3715.0	3005.0	2515.0	342.0	1025.0	15053.0	8341.0	3952.0	0.0
01514b1eefaab7c2b75c8a9d0f1c85e6	80.0	92.0	73.0	61.0	0.0	6378.0	14583.0	19348.0	4666.0	1712.0	0.0	63.0	0.0	0.0
79882a047a01ea067efc1c77bb2ade6c	6161.0	1099.0	607.0	966.0	279.0	3457.0	1144.0	2492.0	452.0	813.0	11691.0	9845.0	4386.0	0.0
087e50a409374f400614f96d9c161f62	2439.0	5289.0	3184.0	3516.0	586.0	2437.0	8069.0	7205.0	657.0	1605.0	3672.0	2186.0	1577.0	0.0
3eeb4a6278652363d350b5391ebeb470	224.0	382.0	241.0	264.0	0.0	6495.0	2859.0	7791.0	13879.0	9362.0	503.0	32.0	239.0	0.0
fb800d4d7cd0a8e0da07b414fcf21b8c	366.0	3205.0	2036.0	1822.0	42.0	11976.0	3639.0	4532.0	1897.0	4418.0	1107.0	4038.0	1340.0	0.0
a51911fb468aee7787ca8edf2ad66641	3358.0	1805.0	982.0	1239.0	145.0	3813.0	2389.0	2612.0	2373.0	1891.0	5729.0	6258.0	5757.0	0.0
b632a177daad11d134247ee04ab8b120	0.0	587.0	406.0	434.0	0.0	1683.0	2569.0	4560.0	19647.0	7198.0	73.0	0.0	52.0	0.0
57f316f2b8bb8cd1fcfdfe2c557148f0	2748.0	5053.0	3539.0	3326.0	142.0	1111.0	0.0	0.0	0.0	0.0	7024.0	6678.0	6413.0	0.0
25cb02fb17426d878afd69a79572b858	369.0	2992.0	1913.0	1850.0	0.0	3394.0	2500.0	7464.0	5488.0	6259.0	759.0	132.0	375.0	0.0
277ffccb015bf789cd6557b264b38610	4171.0	1650.0	1003.0	1124.0	854.0	2184.0	676.0	715.0	93.0	252.0	8279.0	7219.0	4552.0	13.0
f698bc60e827ed25fbba1b6bc4745a33	3821.0	555.0	397.0	354.0	0.0	581.0	121.0	195.0	226.0	692.0	9310.0	8577.0	7698.0	0.0
4bd8e846b0a7a6637cd52a50348cdada	110.0	1480.0	859.0	995.0	0.0	3389.0	9688.0	7057.0	2080.0	6015.0	100.0	264.0	198.0	0.0
192809e72bf78b432b207e54e8b066cf	2226.0	2921.0	1866.0	2289.0	61.0	2970.0	1542.0	1950.0	2328.0	3534.0	4067.0	1454.0	2168.0	0.0
05d385f8260362e624138cae31e3f909	1330.0	1119.0	716.0	898.0	0.0	5417.0	2952.0	3393.0	3692.0	4453.0	2373.0	1190.0	1609.0	0.0
6b94959874b693c3304e68c57cefd287	2316.0	890.0	436.0	622.0	0.0	3118.0	2003.0	1803.0	5158.0	2167.0	3509.0	3114.0	2900.0	0.0
8ceae18ee0348d694b1a6f77def3b22e	21.0	9291.0	6268.0	6412.0	4887.0	46.0	0.0	0.0	0.0	0.0	0.0	8.0	78.0	20.0
85d24879ef98292c5c0f93b992f197f1	1564.0	2023.0	1374.0	1362.0	18.0	3814.0	4122.0	3730.0	917.0	1417.0	2512.0	2699.0	984.0	0.0
705e5a5b929be7a7acfda7721bb4b79c	2681.0	846.0	476.0	457.0	32.0	4732.0	972.0	2403.0	1655.0	2391.0	4151.0	2525.0	3060.0	0.0
061c2cebcbacd895f0e1ac79d30dc18b	1719.0	1746.0	1042.0	969.0	134.0	1878.0	2062.0	3011.0	246.0	1557.0	3606.0	4183.0	3952.0	0.0
1b9bc3fe984ec89289cffb01a3a3e8a5	1414.0	89.0	34.0	50.0	0.0	685.0	107.0	139.0	10685.0	3915.0	4200.0	1710.0	2562.0	0.0
ca527f2b2b745a618c4c486f18a1de58	4481.0	1604.0	1501.0	2177.0	137.0	1444.0	1062.0	1998.0	177.0	381.0	4882.0	3927.0	1546.0	0.0
dc3835d12dc9edc210bddff9c66bf356	990.0	963.0	609.0	601.0	0.0	5592.0	2041.0	2146.0	2287.0	6111.0	2127.0	279.0	1439.0	3.0
330bfd0f6aa329b6004a231c38608d9f	545.0	381.0	204.0	217.0	0.0	4454.0	1552.0	5463.0	4722.0	6329.0	606.0	101.0	473.0	0.0
cd3252d96bdb1efe5fc05bc00a9d9309	740.0	445.0	231.0	279.0	0.0	867.0	325.0	667.0	16586.0	1519.0	1039.0	984.0	997.0	0.0
fe7b5b769375b837bb6d4bfa6dee234f	65.0	569.0	317.0	366.0	0.0	1992.0	3803.0	5169.0	4729.0	7500.0	89.0	0.0	62.0	0.0
9737b23542e3ae0dac40d87694aa5ea5	3206.0	755.0	461.0	571.0	0.0	1373.0	454.0	424.0	74.0	155.0	6655.0	6425.0	4096.0	0.0
4112eeace57200636aefa80277a9968b	461.0	2747.0	2007.0	1739.0	297.0	1559.0	1251.0	1907.0	5555.0	2937.0	1378.0	1392.0	962.0	0.0
0e43a5ae231c465cac40fead7eb4f508	953.0	1512.0	846.0	915.0	661.0	6137.0	2365.0	1869.0	1025.0	1885.0	1656.0	2084.0	1398.0	2.0
ace853cd3b53581a90639a4cdf0ff326	17.0	184.0	142.0	213.0	22233.0	123.0	66.0	0.0	20.0	20.0	141.0	12.0	69.0	68.0
e959f2d4b8fd92b6dd19e4244fb46f0a	44.0	5180.0	3258.0	3063.0	0.0	5053.0	166.0	2441.0	1154.0	2616.0	120.0	0.0	138.0	0.0
bf0fc57d701c5060d650485ca2bca7b0	387.0	387.0	337.0	202.0	0.0	1390.0	9258.0	7900.0	0.0	70.0	667.0	542.0	1817.0	0.0
149722b13ecbe65895965ca5ab16d1cb	1276.0	2429.0	1320.0	2017.0	0.0	2119.0	2092.0	4031.0	720.0	1413.0	2081.0	2192.0	1205.0	0.0
9100c673ddb0128f63023d0c6d423792	1880.0	2540.0	1587.0	1494.0	153.0	1127.0	1542.0	1233.0	48.0	227.0	4379.0	2754.0	3439.0	0.0
c4b5b0d584a7b6b6019f42b4eb607d91	986.0	2010.0	1064.0	1353.0	0.0	1821.0	2645.0	2698.0	2981.0	3202.0	1399.0	899.0	1205.0	0.0
7f79adb6f17ca8c8dec3d655e2206dd6	17.0	801.0	445.0	457.0	0.0	345.0	116.0	212.0	14098.0	5607.0	12.0	27.0	34.0	0.0
af27577de5edb10c09f7fc19b9ca45ca	961.0	2457.0	1514.0	1360.0	653.0	7181.0	243.0	399.0	1775.0	2715.0	1260.0	689.0	490.0	0.0
9c253b045234173540111db036e207ba	693.0	1801.0	1218.0	1311.0	0.0	1215.0	4583.0	3101.0	174.0	446.0	2064.0	1953.0	2528.0	0.0
9711a7623ac2b145da2624b49032e793	1078.0	655.0	469.0	489.0	0.0	2189.0	850.0	523.0	10.0	47.0	4122.0	6076.0	3454.0	0.0
18a735528faa18075b5756ea18638874	1981.0	653.0	453.0	387.0	0.0	6427.0	457.0	227.0	0.0	0.0	4783.0	2784.0	1684.0	0.0
9428beb80a1d1a2031c5b1f67560ceb0	41.0	1817.0	1299.0	1175.0	0.0	517.0	6689.0	7050.0	0.0	0.0	45.0	41.0	108.0	0.0
3fcfca31f74f1fc0ec1337c4694b7bed	476.0	2929.0	1705.0	1752.0	0.0	833.0	4123.0	3791.0	107.0	373.0	546.0	1149.0	818.0	0.0
76b3702714054274614f58000038c1be	317.0	2787.0	2048.0	1891.0	0.0	881.0	3879.0	3008.0	174.0	639.0	961.0	853.0	913.0	0.0
01b83ab7847cd02b3473612a31395619	573.0	112.0	61.0	48.0	0.0	2901.0	540.0	1028.0	1470.0	1272.0	2542.0	3438.0	4156.0	0.0
96cdc2598420800428c9781e8fd9819e	1630.0	551.0	291.0	295.0	0.0	4668.0	2627.0	1182.0	33.0	67.0	1586.0	1672.0	3279.0	0.0
2daba14542270de8af1a229f9c1d8e96	288.0	247.0	141.0	122.0	0.0	2920.0	826.0	343.0	27.0	74.0	2055.0	7844.0	2901.0	0.0
49363be39f4e73fc08154c4e95e73321	697.0	587.0	314.0	335.0	0.0	1338.0	1372.0	1738.0	6286.0	2452.0	848.0	805.0	844.0	0.0
0b60e65624fab50047f1eb1eb04002d1	42.0	0.0	0.0	32.0	0.0	8129.0	341.0	1006.0	5333.0	2118.0	40.0	66.0	40.0	0.0
8735f92a7f18db944bc862777fbd3222	266.0	267.0	134.0	127.0	565.0	3811.0	472.0	856.0	7674.0	1452.0	936.0	179.0	304.0	0.0
3bb0bf5132b0f988573de9bd6059b22c	523.0	3626.0	2100.0	2007.0	0.0	2985.0	1043.0	1089.0	509.0	915.0	1322.0	338.0	572.0	0.0
e1664fbc297a312ba966923bfe185845	0.0	0.0	0.0	0.0	0.0	173.0	256.0	2402.0	7092.0	7106.0	0.0	0.0	0.0	0.0
efe4682d2b4dabc0aee6bf43744f54c4	315.0	1215.0	750.0	818.0	0.0	744.0	6165.0	4841.0	218.0	578.0	583.0	409.0	206.0	0.0
c2e86c06a23f4cdd47e03f9ce22fe0f9	2144.0	527.0	308.0	333.0	0.0	1045.0	640.0	514.0	0.0	214.0	6010.0	3164.0	1491.0	0.0
62a845538d745dad19f77539227b3d83	113.0	2892.0	1520.0	1578.0	636.0	1673.0	3344.0	2704.0	350.0	1042.0	98.0	197.0	216.0	0.0
2dedf60782b3991cc0db7a015431a814	1667.0	1632.0	815.0	1293.0	49.0	996.0	1006.0	1523.0	149.0	292.0	3019.0	2332.0	1338.0	0.0
837dffe8e58c86fd74dbee41cfc3991c	697.0	324.0	213.0	188.0	0.0	270.0	61.0	140.0	527.0	118.0	2043.0	5883.0	5089.0	0.0
d6c6048d165a11a47c4c89fef20660a0	11.0	551.0	352.0	331.0	0.0	319.0	1155.0	1723.0	7871.0	3146.0	18.0	0.0	22.0	0.0
5ca616cdf71cd33902079e3cfcfbf60e	2025.0	402.0	235.0	201.0	0.0	414.0	0.0	0.0	0.0	0.0	4565.0	4175.0	3264.0	0.0
67ef9811465d4828d3b291ca4a5ca547	544.0	133.0	78.0	87.0	0.0	2982.0	5117.0	4027.0	0.0	122.0	521.0	263.0	1384.0	0.0
235a89f255d93a7570269a56c53dba64	496.0	0.0	0.0	0.0	0.0	2916.0	574.0	2300.0	3291.0	4742.0	585.0	85.0	234.0	0.0
61cb5f960b0ec2c7ab4d041f7c3f6cd8	0.0	42.0	0.0	0.0	0.0	159.0	945.0	5086.0	2800.0	6108.0	10.0	11.0	0.0	0.0
fbcf8acf6ce9cf047ffdc988e35d13b3	76.0	680.0	425.0	457.0	0.0	803.0	806.0	1604.0	2890.0	6594.0	141.0	162.0	160.0	0.0
592f70fe9f5b7b42dd5d0eb961faa1f0	1414.0	385.0	218.0	182.0	0.0	1727.0	2533.0	4291.0	408.0	448.0	1521.0	184.0	1439.0	0.0
7c338eeece15edbfcf8ed52c568f6fc2	380.0	1346.0	839.0	864.0	0.0	1979.0	1254.0	615.0	61.0	367.0	1895.0	3560.0	1491.0	0.0
df5a202cb8b5dd965d25b663c02af8d0	72.0	45.0	51.0	39.0	0.0	133.0	6418.0	5777.0	914.0	715.0	128.0	56.0	53.0	0.0
22d0bcd522f4d062db4886edef1ee30d	181.0	4092.0	2376.0	2595.0	0.0	674.0	1167.0	877.0	25.0	246.0	637.0	599.0	582.0	0.0
b744eae1244325f606575483df0de67e	236.0	878.0	603.0	654.0	0.0	613.0	3493.0	2733.0	2240.0	1700.0	333.0	141.0	291.0	0.0
d483745fc51127093fcf524e1f1e3a34	0.0	102.0	77.0	67.0	0.0	27.0	2456.0	10824.0	237.0	52.0	0.0	25.0	13.0	0.0
f7d481c6e4ae9e0ac296fe40603965f7	1208.0	644.0	315.0	322.0	0.0	7693.0	731.0	332.0	162.0	156.0	610.0	634.0	1058.0	0.0
59da0ed6c4b6626c26b73745b1a3ef93	0.0	0.0	0.0	12.0	0.0	0.0	3.0	74.0	7358.0	6169.0	34.0	0.0	0.0	0.0
690c48464d506b0e07bf7bdf6ccc0758	15.0	81.0	61.0	45.0	0.0	2503.0	450.0	441.0	4424.0	5470.0	21.0	0.0	0.0	0.0
91c17131cd04751c175243c37e94f7eb	860.0	598.0	346.0	395.0	0.0	1088.0	96.0	158.0	428.0	151.0	3355.0	3096.0	2799.0	0.0
7b5ed1a5dbfdd60ca5370a26acabe326	2299.0	108.0	86.0	62.0	0.0	156.0	362.0	175.0	0.0	0.0	2247.0	6221.0	1592.0	0.0
a03e297d34ac672d673b3253093914e4	14.0	0.0	0.0	0.0	0.0	1355.0	115.0	1568.0	4271.0	5844.0	0.0	0.0	0.0	0.0
3592eff80384863b43da83f854567aeb	1301.0	84.0	60.0	51.0	0.0	1819.0	279.0	292.0	0.0	0.0	3775.0	2903.0	2477.0	0.0
241e8502021e383416a9408a45e63307	277.0	242.0	176.0	154.0	10.0	529.0	5379.0	3913.0	149.0	306.0	485.0	839.0	511.0	0.0
b1692e6de05b138f31d05ac33d4291f0	1314.0	38.0	28.0	24.0	0.0	424.0	17.0	0.0	0.0	0.0	4234.0	981.0	5818.0	0.0
347716bb5136891ef74d6eb5d119e41a	256.0	1043.0	667.0	653.0	0.0	1074.0	1572.0	1820.0	719.0	2089.0	1156.0	646.0	1169.0	0.0
a381f0333e4b087bbf5bf606bcb0a631	394.0	332.0	170.0	244.0	0.0	1548.0	2165.0	2215.0	2234.0	2388.0	366.0	295.0	358.0	0.0
4bd1bf5ab58039b778e18136f3ed1296	497.0	365.0	241.0	218.0	0.0	1512.0	589.0	975.0	395.0	548.0	2461.0	2465.0	2244.0	0.0
b9ec925948ce85275d7f971e588f0b39	662.0	2830.0	1537.0	1681.0	78.0	893.0	137.0	88.0	0.0	0.0	1453.0	1423.0	1287.0	0.0
ab976ca8b7323b4369470c5f3fd9a1fd	435.0	0.0	0.0	0.0	0.0	3016.0	555.0	1948.0	1362.0	2108.0	1899.0	283.0	344.0	0.0
4c3d8f073704bb3fa8bd79097324ee60	173.0	1795.0	1163.0	1272.0	186.0	1736.0	1002.0	1194.0	0.0	63.0	560.0	2037.0	760.0	0.0
2b72428ebbcbfc529a8aecf2ea37157c	1540.0	501.0	312.0	368.0	0.0	581.0	0.0	0.0	0.0	0.0	2789.0	3309.0	2176.0	0.0
37762c5e9b1d5a5233d6caeef3660d6a	1150.0	615.0	357.0	408.0	119.0	769.0	236.0	358.0	1250.0	918.0	2030.0	1617.0	1360.0	0.0
372df4811c66c481c68b34dd7d0ada33	62.0	3838.0	2941.0	3445.0	231.0	24.0	283.0	146.0	0.0	0.0	44.0	53.0	83.0	0.0
02302e176d74b8b7d3342ea21dda7e5c	0.0	4527.0	3382.0	3042.0	0.0	0.0	0.0	0.0	0.0	0.0	0.0	8.0	56.0	5.0
c39ea129388a077989abed2081b5fe88	27.0	164.0	101.0	130.0	0.0	1677.0	542.0	497.0	7014.0	766.0	42.0	16.0	17.0	0.0
22c618253124240b804cbc9c8371ea99	804.0	572.0	285.0	466.0	286.0	849.0	731.0	1597.0	536.0	817.0	1413.0	1638.0	853.0	0.0
9adf9d24e5509b5ddba1d46d1e3952e4	481.0	53.0	29.0	0.0	0.0	737.0	232.0	185.0	2524.0	1509.0	1580.0	1683.0	1579.0	0.0
94dcde6fbc8f38682f5f79321b020d22	1199.0	0.0	0.0	0.0	0.0	574.0	0.0	0.0	0.0	0.0	3439.0	2889.0	2466.0	0.0
89c76625e45ab0499f29cc2dc2beb69c	49.0	476.0	267.0	306.0	0.0	872.0	2080.0	1863.0	2014.0	2139.0	88.0	22.0	39.0	0.0
69456b706bb8d9b1987c13d809e8293e	1249.0	577.0	423.0	542.0	61.0	549.0	237.0	290.0	46.0	90.0	2880.0	1668.0	1236.0	0.0
53b227995a6a99a320f4efd39444e8ff	70.0	2600.0	1509.0	1571.0	0.0	378.0	1080.0	895.0	13.0	67.0	187.0	412.0	249.0	2.0
4b9a9d8c4e661b02fad5ef87318e4020	539.0	1408.0	1050.0	1095.0	0.0	180.0	11.0	8.0	0.0	0.0	995.0	2087.0	1522.0	0.0
4bb8585142837115b245fbb620caaade	1204.0	141.0	91.0	113.0	0.0	133.0	0.0	0.0	0.0	0.0	2290.0	3638.0	1266.0	0.0
2950abe3815428547c4eb7d9002a4c91	410.0	1096.0	578.0	709.0	0.0	565.0	627.0	856.0	851.0	718.0	775.0	773.0	746.0	0.0
07cddda789bdbbb862ad9c5e73d5824a	424.0	2241.0	1440.0	1427.0	0.0	123.0	0.0	0.0	0.0	0.0	894.0	1322.0	780.0	0.0
fe8c8a9a5a0157c514051708618ce535	939.0	667.0	393.0	504.0	267.0	403.0	74.0	95.0	0.0	0.0	2126.0	2043.0	963.0	0.0
7857d3187944415a804e443783213d31	678.0	512.0	322.0	338.0	0.0	123.0	0.0	0.0	0.0	0.0	1387.0	2876.0	2175.0	0.0
7e8a6238d2b8e06fe07982db5f2dc2db	131.0	358.0	196.0	147.0	0.0	320.0	895.0	5565.0	191.0	131.0	171.0	57.0	98.0	0.0
dcda68119d2e24090194c9af5a818225	1423.0	440.0	219.0	267.0	0.0	235.0	12.0	0.0	0.0	0.0	2484.0	1781.0	1376.0	0.0
476222b970d79ce648d99e7bb76b179d	34.0	2605.0	1586.0	1704.0	0.0	54.0	954.0	1014.0	0.0	17.0	73.0	91.0	96.0	0.0
720b43663d61f720cbda595a52767410	0.0	257.0	204.0	144.0	0.0	55.0	4674.0	2570.0	38.0	0.0	0.0	0.0	0.0	0.0
e2640b890e73b29c5474b346e4969b40	0.0	2814.0	1690.0	1751.0	0.0	0.0	990.0	575.0	0.0	0.0	0.0	0.0	0.0	0.0
be88e4d3065c7635dda8d854e93850ed	178.0	586.0	362.0	434.0	117.0	800.0	1976.0	1623.0	316.0	497.0	294.0	343.0	154.0	0.0
9c886d46813a724862c055b0ed46e86d	62.0	998.0	718.0	712.0	316.0	1968.0	1418.0	795.0	81.0	220.0	102.0	178.0	99.0	0.0
54d9aba369f5b002ebed85fb76fcaf37	74.0	3021.0	1834.0	1840.0	166.0	67.0	69.0	51.0	0.0	0.0	155.0	188.0	126.0	0.0
3627e37d11dd40b3e371fd11005fdad5	0.0	15.0	25.0	31.0	0.0	40.0	4453.0	2853.0	31.0	60.0	28.0	27.0	19.0	0.0
9bcce5172733b3fabf82e21069348ead	248.0	23.0	0.0	12.0	0.0	1685.0	296.0	362.0	478.0	415.0	1020.0	1658.0	1096.0	0.0
1f93c77d645099d4e473c8ae649b23bf	1289.0	182.0	95.0	100.0	0.0	612.0	65.0	94.0	0.0	27.0	1583.0	1666.0	1543.0	0.0
53b0bf16a3ebf64cb2ca3854a7853e91	0.0	1588.0	1522.0	1204.0	0.0	0.0	1302.0	1585.0	49.0	0.0	0.0	0.0	0.0	0.0
754165389d1d58c2eec530e907fc5d65	386.0	1172.0	709.0	721.0	0.0	775.0	992.0	1371.0	25.0	119.0	363.0	203.0	318.0	0.0
64edc344889f4279a1292afbe81dc043	472.0	1114.0	868.0	718.0	39.0	297.0	402.0	240.0	19.0	33.0	1082.0	924.0	927.0	0.0
ed039cbff88ddc9dbed020e880caaea0	0.0	0.0	0.0	0.0	0.0	466.0	0.0	819.0	2740.0	3079.0	0.0	0.0	0.0	0.0
d1f2256dc0ed8d7d9458ed3b48f3cd2b	110.0	577.0	369.0	400.0	0.0	1113.0	254.0	1297.0	619.0	1840.0	364.0	89.0	69.0	0.0
2ffc5bba8b56d331697fbd2db663fa69	0.0	62.0	23.0	24.0	0.0	501.0	183.0	2462.0	1010.0	2771.0	14.0	0.0	0.0	0.0
6f2244e5f9b507cb5df5a817ae1a8302	0.0	0.0	0.0	9.0	0.0	0.0	0.0	59.0	3670.0	3212.0	16.0	0.0	0.0	0.0
4776b32231aaee630aea9908de58a4d9	725.0	290.0	144.0	193.0	0.0	684.0	193.0	260.0	365.0	581.0	1438.0	981.0	902.0	0.0
f02a8fc112896c014ac061ca2f27d6df	133.0	260.0	150.0	192.0	0.0	1254.0	765.0	945.0	1393.0	1081.0	238.0	143.0	55.0	0.0
2a720f2bb26470ac9599bebf608757ac	4.0	100.0	63.0	62.0	0.0	634.0	296.0	478.0	2138.0	2787.0	9.0	0.0	2.0	0.0
2e0d5aa5dfe9a5326f50bb114d95978e	185.0	237.0	157.0	150.0	0.0	478.0	788.0	305.0	50.0	216.0	1144.0	1090.0	1738.0	0.0
a85dac4b1f219056bae0918512ed5d8c	0.0	34.0	33.0	24.0	0.0	169.0	71.0	585.0	2743.0	2846.0	5.0	0.0	0.0	0.0
c71fe9fd229a8546223bb74bbc54d0e8	156.0	223.0	160.0	131.0	0.0	410.0	739.0	287.0	61.0	211.0	1175.0	1109.0	1770.0	0.0
a71c2b364419addf3c4a76844f1355fc	0.0	22.0	13.0	0.0	0.0	69.0	0.0	58.0	6007.0	260.0	0.0	0.0	0.0	0.0
bc9a99e95c42d814dbaeab935b2ba74c	0.0	0.0	0.0	0.0	0.0	257.0	0.0	0.0	6012.0	146.0	0.0	0.0	0.0	0.0
6b235822a9e52c63e60c1bd0601cb114	235.0	54.0	39.0	41.0	0.0	3637.0	1118.0	301.0	113.0	187.0	214.0	151.0	203.0	0.0
398b27b58cd45cd00d44f536a9411b08	0.0	1400.0	957.0	862.0	0.0	0.0	1838.0	1220.0	0.0	0.0	0.0	0.0	0.0	0.0
14c7203af15e1859f6bcec4b477bcf42	215.0	87.0	42.0	65.0	64.0	197.0	18.0	0.0	0.0	0.0	1233.0	2276.0	2048.0	0.0
56bc9f369fcdaac3138a359ab8bc49fe	0.0	0.0	0.0	65.0	0.0	0.0	260.0	1143.0	1682.0	3044.0	0.0	0.0	0.0	0.0
70c039d8c51974900eb441e93620c97e	0.0	2921.0	1844.0	1353.0	0.0	31.0	0.0	0.0	0.0	0.0	0.0	0.0	32.0	0.0
a09f9686e65622421296cf7ea7e92ae8	0.0	21.0	0.0	11.0	0.0	88.0	55.0	1363.0	1596.0	2994.0	14.0	0.0	0.0	0.0
f472eb6b56eccc5ffe281514e21802cd	694.0	750.0	435.0	671.0	0.0	254.0	0.0	0.0	81.0	0.0	1135.0	1519.0	581.0	0.0
9fe7a391fdc7d72d95b66fd3a1a5374c	0.0	1497.0	1030.0	1301.0	163.0	52.0	972.0	889.0	24.0	143.0	0.0	19.0	26.0	0.0
dd8229814f2d127e61ac92c5d275db8b	243.0	375.0	252.0	236.0	0.0	2680.0	140.0	0.0	0.0	0.0	1386.0	526.0	245.0	0.0
5a2850d155835c025a77f54a5af01085	83.0	1694.0	828.0	860.0	0.0	706.0	199.0	187.0	0.0	23.0	228.0	925.0	317.0	0.0
f68c45909b99408dc34d145a2e374c45	0.0	0.0	0.0	26.0	0.0	412.0	0.0	0.0	5575.0	0.0	0.0	0.0	0.0	0.0
b9a72d442d7089ce53a873348fbe5071	857.0	398.0	221.0	198.0	0.0	322.0	447.0	249.0	0.0	0.0	1112.0	1288.0	909.0	0.0
2b171e4c26f481ddc20506b79877b519	64.0	186.0	119.0	116.0	0.0	1019.0	2501.0	1572.0	24.0	76.0	121.0	112.0	66.0	0.0
4cfe5b5468150f8a54cf003ea4c15603	0.0	2350.0	1869.0	1670.0	0.0	0.0	0.0	0.0	0.0	0.0	0.0	0.0	26.0	0.0
1311edfd06cb369478fd4ac2410a3bfd	667.0	176.0	133.0	136.0	0.0	348.0	131.0	132.0	0.0	0.0	1926.0	1022.0	1231.0	0.0
3667bdb79bae37e87cc801ab34639b3e	188.0	175.0	84.0	144.0	0.0	350.0	641.0	947.0	1724.0	890.0	294.0	245.0	213.0	0.0
64d5abc702e5bcac2f33490e754bc457	98.0	1420.0	736.0	849.0	0.0	282.0	896.0	1079.0	56.0	120.0	150.0	108.0	84.0	0.0
dd8d49ec775b64c5c0eaf87db986b38f	160.0	0.0	0.0	0.0	0.0	1353.0	1759.0	460.0	476.0	1017.0	289.0	183.0	179.0	0.0
c53c03c968989613d1d10495e9b56d34	11.0	0.0	0.0	0.0	0.0	2316.0	62.0	1700.0	1390.0	250.0	0.0	0.0	0.0	0.0
e750785f4ec0290b5b57ccbb9f86296c	1155.0	427.0	245.0	275.0	0.0	709.0	0.0	0.0	0.0	0.0	826.0	1128.0	831.0	0.0
ab227be65b5b39e154a826b5bb43d3c9	40.0	418.0	184.0	266.0	397.0	1412.0	357.0	628.0	452.0	1057.0	104.0	98.0	179.0	0.0
4f6f8827a79e2de7326ca13eff5bdee8	313.0	39.0	23.0	0.0	0.0	98.0	0.0	0.0	0.0	0.0	1242.0	2115.0	1687.0	0.0
466c2c4cb06ba39543c40a74c027008a	0.0	46.0	0.0	54.0	0.0	117.0	198.0	590.0	3122.0	1366.0	0.0	0.0	0.0	0.0
a8128bcc0a94531fd5366f0c2fa30a96	192.0	1321.0	825.0	765.0	21.0	223.0	759.0	582.0	37.0	80.0	281.0	250.0	147.0	0.0
79ee2fe49b49eb577ecba4f586c0f124	131.0	507.0	324.0	353.0	0.0	224.0	0.0	0.0	0.0	0.0	750.0	2589.0	602.0	0.0
2bbe9ffa11b7f8f8f39949efd572622e	325.0	441.0	283.0	274.0	28.0	655.0	74.0	37.0	0.0	0.0	846.0	1891.0	605.0	0.0
e90365ed36204bee79d12dd8e193b677	191.0	391.0	258.0	263.0	0.0	840.0	885.0	827.0	0.0	110.0	354.0	886.0	443.0	0.0
0f46c35d6629feaffa5e8f4b256e255b	334.0	1188.0	782.0	851.0	0.0	289.0	0.0	0.0	0.0	0.0	464.0	1087.0	406.0	0.0
699b9ea66bef1f4ca49569657137341e	81.0	68.0	55.0	29.0	0.0	3443.0	211.0	491.0	75.0	0.0	193.0	421.0	309.0	0.0
f2d693689c88ce5d49a45b49e0dccff1	14.0	0.0	0.0	0.0	0.0	2942.0	1342.0	145.0	161.0	702.0	0.0	0.0	0.0	0.0
1278e1fcb113cc302b185f3d4c4d94fe	0.0	1235.0	780.0	852.0	0.0	355.0	228.0	597.0	254.0	744.0	97.0	52.0	56.0	0.0
e8973ae029146677bed22be938cfec90	0.0	980.0	539.0	597.0	0.0	58.0	1222.0	1735.0	20.0	80.0	0.0	0.0	17.0	0.0
90bf8c4ae78fcbc99cc9fc3be8d5ec87	840.0	159.0	123.0	122.0	0.0	1678.0	890.0	478.0	0.0	6.0	409.0	112.0	381.0	0.0
219a620aa72de55cbcdf5d38d6b93f86	0.0	0.0	0.0	0.0	0.0	0.0	0.0	233.0	2783.0	2180.0	0.0	0.0	0.0	0.0
a317a16b6d8047221b2fd8083bdfc0d8	476.0	135.0	75.0	72.0	0.0	106.0	0.0	0.0	0.0	0.0	1281.0	839.0	2192.0	0.0
2190dbbf36ecbe4bc58d62a9799c4c80	76.0	416.0	257.0	207.0	0.0	889.0	1217.0	1393.0	0.0	45.0	98.0	320.0	140.0	0.0
854cc9b373a82386b5aacf9af821798f	207.0	0.0	0.0	0.0	0.0	709.0	170.0	156.0	1138.0	1959.0	429.0	0.0	151.0	0.0
32f5ea2fe62977464afbb999b65e93d5	389.0	181.0	110.0	117.0	0.0	546.0	309.0	255.0	70.0	177.0	733.0	971.0	1058.0	0.0
badeae06f9f02ed7567ab02f37fc1612	89.0	1734.0	1069.0	1225.0	0.0	35.0	68.0	42.0	0.0	0.0	144.0	236.0	268.0	0.0
af80fb33e72fbb41c8e546e18ecc5acc	384.0	131.0	92.0	74.0	0.0	246.0	0.0	0.0	0.0	0.0	1526.0	1541.0	903.0	0.0
93ffe58972bc33cd2395402c7cbfa380	0.0	1910.0	1332.0	1413.0	0.0	16.0	29.0	26.0	0.0	0.0	0.0	6.0	34.0	0.0
a46aeb4fd6ec88c28aa09dca8394b9be	34.0	1101.0	588.0	650.0	0.0	84.0	515.0	593.0	204.0	746.0	31.0	20.0	23.0	0.0
fb2dab56bf8047ade734c2fceccb49e4	364.0	747.0	623.0	532.0	160.0	0.0	210.0	0.0	0.0	0.0	672.0	698.0	546.0	0.0
2c674dd5dcc493fc0bad82c12f46397e	391.0	466.0	319.0	328.0	0.0	210.0	52.0	30.0	0.0	0.0	857.0	945.0	930.0	0.0
f9efe2e7cd51a9bce0239e5b139cb8fd	430.0	191.0	104.0	98.0	0.0	206.0	247.0	314.0	211.0	458.0	978.0	588.0	701.0	0.0
b7a2bc450146ff938fb3354ecc36444a	0.0	48.0	19.0	13.0	0.0	356.0	0.0	29.0	3892.0	164.0	0.0	0.0	0.0	0.0
c4855f5652577f7141c9facef8b3e81f	393.0	156.0	100.0	141.0	0.0	357.0	103.0	199.0	205.0	448.0	1001.0	1006.0	404.0	0.0
f5241871c9883eefa0989204886bf44e	258.0	39.0	23.0	21.0	0.0	177.0	0.0	0.0	0.0	0.0	922.0	1590.0	1476.0	0.0
55d3702709ba500b340b50ed178d15c8	56.0	0.0	0.0	0.0	0.0	578.0	1090.0	537.0	570.0	150.0	566.0	161.0	724.0	0.0
2c079e24dc2f522c954ee445ac382624	0.0	0.0	0.0	0.0	0.0	0.0	0.0	162.0	2598.0	1646.0	0.0	0.0	0.0	0.0
2822e32ad2c4d2fc9fb2d048c3d5a69b	14.0	1124.0	735.0	797.0	0.0	15.0	650.0	928.0	0.0	7.0	13.0	12.0	26.0	0.0
3f04bd2a359b976892faa13fcb4de619	282.0	345.0	210.0	214.0	0.0	389.0	165.0	398.0	607.0	740.0	432.0	265.0	270.0	0.0
daffef7d90ce96421af461c0b75a97e9	0.0	1629.0	1075.0	906.0	0.0	264.0	177.0	236.0	0.0	0.0	0.0	0.0	0.0	0.0
aed191bac0b1c3264208a084af848bed	0.0	1639.0	918.0	940.0	69.0	239.0	205.0	128.0	0.0	0.0	104.0	0.0	0.0	0.0
cc60bdef4ebf7d009dec4be91269d442	130.0	1021.0	745.0	714.0	237.0	139.0	494.0	357.0	0.0	0.0	113.0	132.0	147.0	0.0
63f71034e0a3b1e9b5f3fe25d094318d	0.0	2023.0	1184.0	1011.0	0.0	0.0	0.0	0.0	0.0	0.0	0.0	0.0	0.0	0.0
7628495872b6e72d1ab2310ace27b205	861.0	0.0	0.0	0.0	0.0	0.0	0.0	0.0	0.0	0.0	1496.0	864.0	989.0	0.0
c58b8d27af57c37c4de34c3251b33601	287.0	433.0	336.0	319.0	0.0	339.0	500.0	569.0	162.0	222.0	402.0	309.0	320.0	0.0
5fbb8d16aa790e4cda6e53d9870c4656	11.0	0.0	3.0	0.0	0.0	227.0	18.0	23.0	3015.0	787.0	53.0	0.0	8.0	0.0
56710e7205e713d843b6a64b63b4803d	229.0	121.0	0.0	70.0	0.0	700.0	998.0	832.0	213.0	399.0	271.0	106.0	196.0	0.0
b899be5a0112fa5d46fea0ba45e66145	0.0	0.0	0.0	0.0	0.0	0.0	0.0	519.0	2722.0	864.0	4.0	0.0	0.0	0.0
0b14bc545295abb80247367673eb0d6f	328.0	170.0	106.0	99.0	0.0	148.0	0.0	0.0	0.0	0.0	894.0	1441.0	888.0	0.0
fef3018fe3a9e60d9c24d53e887095a4	224.0	569.0	347.0	337.0	0.0	184.0	88.0	98.0	74.0	54.0	810.0	790.0	361.0	0.0
fe4fa25ebd9180ab8ae225854891a5da	91.0	159.0	88.0	82.0	0.0	1289.0	441.0	227.0	0.0	18.0	373.0	528.0	629.0	0.0
6a55f886612aa1730cc76226061b6115	80.0	289.0	244.0	203.0	0.0	246.0	26.0	0.0	0.0	0.0	975.0	977.0	877.0	0.0
a431a69105441cdff4d23466d64ce786	0.0	62.0	60.0	58.0	0.0	1592.0	158.0	333.0	279.0	430.0	97.0	628.0	176.0	0.0
6254d2326e6493ce4a0f590d5d325432	45.0	129.0	75.0	87.0	0.0	1588.0	376.0	751.0	235.0	0.0	97.0	326.0	144.0	0.0
b4918ca05ca56eb640aa8aabf485ef04	0.0	0.0	0.0	0.0	0.0	0.0	0.0	98.0	2237.0	1469.0	0.0	0.0	0.0	0.0
b93f2eb95b3fe4d5223c577dbc47756a	189.0	816.0	493.0	487.0	12.0	204.0	371.0	416.0	44.0	132.0	204.0	193.0	214.0	0.0
4ae83d74ad719968841b2be6d950de3f	254.0	0.0	0.0	0.0	0.0	372.0	0.0	0.0	0.0	0.0	541.0	1408.0	1135.0	0.0
6533bf8927fde081ee036603a98b8fa4	37.0	298.0	211.0	197.0	0.0	39.0	1553.0	1186.0	7.0	18.0	56.0	46.0	61.0	0.0
efe87d5e34411be2f29ab51fb34989c7	6.0	617.0	393.0	410.0	0.0	57.0	1104.0	961.0	16.0	84.0	6.0	29.0	23.0	0.0
91fd8961af37b5fd26c713305041544e	46.0	96.0	63.0	45.0	0.0	1737.0	267.0	615.0	111.0	338.0	34.0	139.0	117.0	0.0
c1b4d4f034152d964a49c3f6559274ac	97.0	940.0	26.0	146.0	0.0	16.0	0.0	0.0	0.0	0.0	592.0	902.0	868.0	0.0
d41f6177db9a23f2c043d85c86823523	346.0	46.0	36.0	27.0	0.0	1333.0	427.0	98.0	55.0	126.0	339.0	287.0	443.0	0.0
659da96ce96645ffaa90c3a772b4c97a	0.0	1536.0	915.0	1020.0	0.0	0.0	0.0	0.0	26.0	0.0	0.0	0.0	34.0	0.0
5bbe2d8886da4e2af831748a63755b68	0.0	37.0	26.0	0.0	0.0	87.0	0.0	0.0	3284.0	37.0	0.0	0.0	0.0	0.0
3b945aa6a66a6c2fe1c2cd13c0c2bfcd	0.0	0.0	0.0	31.0	0.0	2466.0	0.0	0.0	371.0	314.0	0.0	199.0	86.0	0.0
3679631e2f2a3285f3be035d8d7cfc9a	144.0	46.0	0.0	0.0	0.0	275.0	0.0	0.0	0.0	0.0	801.0	1493.0	701.0	0.0
0dcaa4f89596268dd359d8b6c0e4e8f2	57.0	625.0	375.0	434.0	0.0	162.0	457.0	641.0	141.0	319.0	121.0	36.0	43.0	0.0
b9017d425673e37963cfad9092c5b03e	52.0	1265.0	748.0	644.0	82.0	54.0	92.0	129.0	0.0	0.0	109.0	127.0	102.0	0.0
e747694a818ae82e58f977992c196fd0	191.0	790.0	401.0	465.0	0.0	157.0	141.0	166.0	41.0	91.0	445.0	251.0	261.0	0.0
936c86f9ef8bd8238d01bd10f4d9c104	0.0	1386.0	1008.0	765.0	0.0	20.0	53.0	61.0	20.0	23.0	0.0	0.0	13.0	0.0
94720ea07668026aeed059a444b7e90d	0.0	0.0	0.0	0.0	0.0	152.0	0.0	0.0	3054.0	119.0	0.0	0.0	0.0	0.0
66aea48c437ecdb4264f889c5f3cb5c9	0.0	0.0	0.0	0.0	0.0	0.0	11.0	276.0	760.0	2273.0	0.0	0.0	0.0	0.0
508e4d4db7e2c0220a19fafa294e0670	0.0	92.0	66.0	74.0	0.0	303.0	0.0	208.0	2292.0	262.0	0.0	0.0	0.0	0.0
90c7c8146d5214896d639ec0a8e367ef	90.0	21.0	20.0	24.0	0.0	212.0	1370.0	1098.0	0.0	18.0	133.0	112.0	166.0	0.0
e411ec81a83e1d49a5107bae7397fc50	0.0	1368.0	947.0	917.0	0.0	0.0	0.0	0.0	0.0	0.0	0.0	0.0	28.0	0.0
f36ea145be9e036f9307bc28da74da86	0.0	0.0	0.0	0.0	0.0	0.0	0.0	27.0	706.0	2512.0	4.0	0.0	0.0	0.0
e6e89dda427b5c446437d2403ad335e5	0.0	119.0	113.0	81.0	0.0	2088.0	333.0	291.0	114.0	0.0	34.0	0.0	58.0	0.0
05e6f0c7be392dabdf7361d575a66819	0.0	0.0	0.0	0.0	0.0	255.0	0.0	0.0	2828.0	113.0	0.0	0.0	0.0	0.0
4f9298e2f05a5248fcaca0636d0b0aeb	0.0	0.0	0.0	0.0	0.0	0.0	1335.0	1206.0	416.0	229.0	0.0	0.0	0.0	0.0
584dbd9cf4b609aecf37caf15ee9ebab	0.0	0.0	0.0	0.0	0.0	0.0	0.0	322.0	1514.0	1348.0	0.0	0.0	0.0	0.0
fbd9b6f2c3b29c16b2445d716b7919ae	0.0	197.0	179.0	418.0	2358.0	0.0	0.0	0.0	0.0	0.0	0.0	0.0	0.0	0.0
eb46c2125c13f968c394a6327e7d72cf	84.0	426.0	237.0	224.0	158.0	901.0	333.0	175.0	0.0	0.0	117.0	290.0	202.0	0.0
afc0eeec83a181be740331928d883362	55.0	200.0	121.0	123.0	0.0	354.0	206.0	283.0	943.0	611.0	98.0	74.0	28.0	0.0
1ba1c6fba5cf7d1a4c6e3caef9e4c813	0.0	40.0	34.0	25.0	0.0	84.0	0.0	40.0	2806.0	51.0	0.0	0.0	0.0	0.0
9910b78ecfcab8367a1b3ae162fb4cee	0.0	0.0	0.0	0.0	0.0	0.0	9.0	32.0	2423.0	611.0	0.0	0.0	0.0	0.0
4c4d23dffc21585b37b8b3084ff91b4c	0.0	1097.0	743.0	785.0	0.0	0.0	0.0	0.0	0.0	0.0	148.0	179.0	121.0	0.0
9af3467db68cf6063627304cecd46a65	21.0	1256.0	553.0	663.0	397.0	0.0	0.0	0.0	30.0	0.0	40.0	51.0	46.0	0.0
22500a4c3a9efe21bfa984a2b95b24e1	213.0	16.0	10.0	0.0	0.0	81.0	0.0	0.0	0.0	0.0	772.0	1219.0	734.0	0.0
7ed766b10cea20bbbb4c1e8423d126f3	0.0	158.0	98.0	98.0	0.0	143.0	155.0	420.0	712.0	1246.0	0.0	0.0	0.0	0.0
b308a57733f11a4c2a93ab783cea4776	25.0	139.0	60.0	57.0	0.0	234.0	594.0	977.0	259.0	590.0	52.0	0.0	24.0	0.0
8b08139d6eb5d7a849dff1bd579727d7	76.0	859.0	608.0	702.0	0.0	339.0	76.0	59.0	0.0	0.0	119.0	62.0	98.0	0.0
ff5a61445b5934a14903e4c8e17edcca	569.0	0.0	39.0	32.0	0.0	359.0	0.0	0.0	0.0	0.0	823.0	458.0	701.0	0.0
901333b252d1a327085a7859cb820d8c	0.0	760.0	595.0	633.0	0.0	0.0	169.0	604.0	0.0	197.0	0.0	0.0	0.0	0.0
c197bfccc6da06a321f59bc2c96c7162	96.0	67.0	46.0	51.0	0.0	871.0	172.0	446.0	111.0	420.0	220.0	276.0	172.0	0.0
68b18e327874b4a4c1d6e69b2a00af10	0.0	0.0	0.0	0.0	0.0	65.0	0.0	0.0	2879.0	0.0	0.0	0.0	0.0	0.0
f4801b7a68515d9005fa572ee6afdf41	0.0	0.0	0.0	0.0	2000.0	0.0	0.0	0.0	0.0	0.0	0.0	0.0	0.0	890.0
4f5d5c70f37db3c66d86b59a75e416ee	140.0	430.0	229.0	357.0	0.0	23.0	0.0	0.0	0.0	0.0	441.0	561.0	674.0	0.0
a120ace2823a953a1a8cc10dd9d805e8	78.0	352.0	197.0	293.0	0.0	682.0	246.0	178.0	22.0	34.0	234.0	302.0	196.0	0.0
2a4ba3d8829bb1be5f70251b3e387bb1	8.0	28.0	22.0	24.0	0.0	355.0	73.0	190.0	987.0	1080.0	26.0	6.0	0.0	0.0
35bd358990986aceb5a8073f44b61e7f	28.0	10.0	0.0	0.0	0.0	0.0	0.0	0.0	0.0	0.0	544.0	898.0	1314.0	0.0
595475f75ce3dacb86e7e42ecf971996	0.0	0.0	0.0	0.0	0.0	0.0	10.0	124.0	1236.0	1424.0	0.0	0.0	0.0	0.0
3fc227a79c6a108319409a05f87103f3	0.0	1209.0	697.0	735.0	0.0	39.0	30.0	27.0	0.0	0.0	19.0	0.0	21.0	0.0
9fc783bad0acc7e1cbbc51c0bbf9abd0	0.0	260.0	172.0	179.0	0.0	424.0	787.0	578.0	124.0	238.0	0.0	0.0	0.0	0.0
9bff57fd6b18040dfd67407bba81b94f	168.0	483.0	239.0	271.0	0.0	182.0	203.0	263.0	122.0	252.0	341.0	111.0	125.0	0.0
22938df8e232d3f31729d9558a99c5cc	349.0	330.0	160.0	245.0	0.0	215.0	0.0	0.0	0.0	0.0	468.0	504.0	484.0	0.0
9d0016d8de4b10b574d714d45aae6143	0.0	504.0	410.0	469.0	0.0	17.0	827.0	471.0	22.0	21.0	0.0	0.0	13.0	0.0
891c0f70ac9a35521db778bce7b12098	83.0	0.0	0.0	0.0	0.0	181.0	216.0	0.0	0.0	0.0	431.0	1097.0	738.0	0.0
d9a05f2abab9fa1b399975cc3af9531a	0.0	136.0	116.0	120.0	0.0	0.0	0.0	322.0	692.0	1344.0	0.0	0.0	0.0	0.0
9ead5ebb35a7c48356c2045918e3c953	28.0	871.0	581.0	616.0	392.0	64.0	0.0	0.0	0.0	0.0	39.0	84.0	46.0	0.0
57e601205e8eb547bbbc0811bcf4afbd	0.0	686.0	422.0	431.0	0.0	229.0	52.0	284.0	428.0	178.0	0.0	0.0	0.0	0.0
aefa91f56a06801ca0624bd8a87d7ea9	0.0	43.0	16.0	27.0	0.0	34.0	252.0	493.0	597.0	1238.0	0.0	0.0	0.0	0.0
6158b1c3d46520276957e059c88a7a8f	1411.0	0.0	0.0	0.0	0.0	260.0	0.0	0.0	0.0	13.0	825.0	30.0	150.0	0.0
361415f522e4c1e777562df222d2309b	150.0	412.0	276.0	243.0	0.0	142.0	442.0	382.0	0.0	58.0	238.0	98.0	234.0	0.0
c3c77a60bf78b5495110b7be950f306c	96.0	381.0	242.0	275.0	0.0	436.0	248.0	307.0	27.0	132.0	117.0	240.0	167.0	0.0
4aa00c458d1dcf7c916ebbe17e00b3e7	0.0	579.0	356.0	349.0	0.0	153.0	477.0	462.0	0.0	0.0	0.0	165.0	123.0	0.0
a75e45f67efe8186c0b9e9344b8d4d01	648.0	0.0	0.0	0.0	0.0	0.0	0.0	0.0	0.0	0.0	882.0	758.0	372.0	0.0
ea377d5e27377eae2eb3de55f61ee3df	0.0	0.0	0.0	0.0	0.0	32.0	0.0	176.0	975.0	1470.0	0.0	0.0	0.0	0.0
ebfaffa75248ba00c7147d3c29829949	239.0	204.0	110.0	136.0	0.0	1107.0	0.0	0.0	0.0	0.0	529.0	155.0	162.0	0.0
9a66017e03fdedda6651d86eb37a299f	490.0	149.0	215.0	265.0	523.0	0.0	0.0	0.0	0.0	0.0	344.0	428.0	214.0	0.0
df641954cccdb1e6313ef6d80c4e99ed	0.0	0.0	0.0	0.0	0.0	77.0	0.0	0.0	2510.0	33.0	0.0	0.0	0.0	0.0
c4dcef41373aba45b59042b08a812760	0.0	0.0	0.0	0.0	0.0	101.0	0.0	0.0	2436.0	78.0	0.0	0.0	0.0	0.0
6c04fda77ffab719b8fc0280eee58e6b	110.0	186.0	166.0	199.0	169.0	160.0	398.0	633.0	45.0	106.0	243.0	99.0	91.0	0.0
ec0f8ae90d57024be7786b39bfa4fd35	0.0	0.0	0.0	0.0	0.0	748.0	81.0	806.0	746.0	213.0	0.0	0.0	0.0	0.0
2872e7cab81214aa8d18054fa4e095a1	6.0	101.0	53.0	51.0	0.0	285.0	248.0	465.0	482.0	867.0	6.0	0.0	0.0	0.0
2b4e6ccd11a78681bceaffed2053907f	298.0	59.0	44.0	47.0	0.0	1136.0	35.0	0.0	21.0	52.0	204.0	514.0	127.0	0.0
74c52060c151dc32f291fb0919bafc61	0.0	567.0	345.0	356.0	0.0	164.0	546.0	499.0	13.0	37.0	0.0	0.0	6.0	0.0
0fa1fef562d807dbf53ae07898c47396	12.0	209.0	108.0	125.0	0.0	697.0	673.0	413.0	0.0	47.0	79.0	87.0	35.0	0.0
a080a409c3444a2a2ebd1d7716b1b32f	115.0	77.0	43.0	48.0	0.0	1149.0	56.0	174.0	156.0	175.0	166.0	166.0	137.0	0.0
3ab7c0cfe8b6d8894bd243b70ab4a8e7	0.0	46.0	40.0	26.0	0.0	243.0	543.0	1401.0	36.0	36.0	81.0	0.0	0.0	0.0
2c070f4880cc78c48ec292dd9c89b597	0.0	0.0	0.0	0.0	0.0	62.0	0.0	198.0	1724.0	450.0	0.0	0.0	0.0	0.0
b28d50f8401c6660191fcf0576c96b5a	251.0	152.0	108.0	94.0	0.0	362.0	40.0	37.0	0.0	0.0	589.0	247.0	549.0	0.0
71be5754288b27bba2fba6be9dbde596	0.0	112.0	0.0	0.0	0.0	590.0	491.0	529.0	176.0	523.0	0.0	0.0	0.0	0.0
ce6e58a79ba6c93d36f15c8b437f7ce9	0.0	0.0	0.0	0.0	0.0	414.0	13.0	83.0	972.0	925.0	0.0	0.0	0.0	0.0
7dd273cfe05a5c5e224f299f760201cf	130.0	63.0	45.0	0.0	0.0	41.0	87.0	0.0	0.0	0.0	1462.0	138.0	415.0	0.0
81e4d0cfd0a3c3f0298bb897e22715d0	55.0	125.0	77.0	85.0	0.0	614.0	617.0	264.0	0.0	0.0	188.0	218.0	124.0	0.0
d8d24bfd1fe2616ed4d1100a7cb56940	118.0	548.0	295.0	318.0	0.0	72.0	0.0	0.0	0.0	0.0	202.0	495.0	300.0	0.0
a4e7c4029a5970db9ae5de9cb1b8ced9	302.0	219.0	125.0	178.0	69.0	136.0	57.0	56.0	29.0	62.0	536.0	348.0	219.0	0.0
755afc7ffddcfd5e093ea2222f4affd6	86.0	459.0	336.0	382.0	0.0	129.0	214.0	208.0	68.0	170.0	94.0	92.0	66.0	0.0
335fc1282f07d47856fa84e621f939db	0.0	83.0	61.0	0.0	0.0	87.0	665.0	628.0	302.0	416.0	0.0	0.0	0.0	0.0
5f90e5e7aad12d9e54489149dae680a5	0.0	0.0	0.0	0.0	0.0	0.0	49.0	268.0	1138.0	782.0	0.0	0.0	0.0	0.0
99e433a3ce4d5290445f668df2c9147e	0.0	0.0	0.0	77.0	2126.0	0.0	0.0	0.0	0.0	0.0	0.0	0.0	0.0	0.0
42016433985454f3186dde297fc37eb6	29.0	206.0	230.0	195.0	0.0	130.0	383.0	726.0	81.0	115.0	54.0	0.0	30.0	0.0
8e1161b45335e125da5a572c1b2cea64	0.0	0.0	0.0	0.0	0.0	0.0	0.0	6.0	528.0	1622.0	6.0	0.0	0.0	0.0
f3568df8761f514321bcc3925853154c	226.0	363.0	205.0	246.0	0.0	107.0	37.0	0.0	0.0	0.0	402.0	331.0	237.0	0.0
2b3e3f7cf214cb5c2056486c550b3cb5	0.0	0.0	0.0	0.0	0.0	0.0	0.0	0.0	2150.0	0.0	0.0	0.0	0.0	0.0
a07da86a91a8a246c06196fae2f4966d	0.0	0.0	0.0	0.0	0.0	113.0	217.0	303.0	726.0	788.0	0.0	0.0	0.0	0.0
9486da0dfc61a6cc41f58f2c399de20d	113.0	101.0	83.0	83.0	0.0	374.0	93.0	149.0	227.0	446.0	203.0	125.0	130.0	0.0
3df65496fb0a02b5389f4df626a903b2	0.0	0.0	0.0	0.0	0.0	19.0	0.0	0.0	2027.0	78.0	0.0	0.0	0.0	0.0
4c637ed47902beff54e1a95c7fc37515	0.0	924.0	548.0	650.0	0.0	0.0	0.0	0.0	0.0	0.0	0.0	0.0	0.0	0.0
a3ae3c687963932fa954dcfe04ea8f17	223.0	0.0	0.0	0.0	0.0	108.0	0.0	0.0	0.0	0.0	1017.0	229.0	543.0	0.0
70f086828189cd2b21299d41e077a74a	114.0	381.0	241.0	306.0	0.0	50.0	102.0	93.0	16.0	65.0	267.0	226.0	249.0	0.0
ca0aa217c5865942af9060f5358eee66	32.0	0.0	9.0	9.0	0.0	29.0	580.0	255.0	0.0	0.0	441.0	259.0	489.0	0.0
aeb1918413f803c42baa9f398d9f83e8	200.0	156.0	84.0	74.0	0.0	154.0	83.0	76.0	0.0	0.0	466.0	420.0	386.0	0.0
e50a50d4bd03e9347d5caf3397469f60	0.0	0.0	0.0	0.0	0.0	0.0	0.0	89.0	1275.0	727.0	0.0	0.0	0.0	0.0
3b7613a1bb56a34bcfa73ebf8ece3711	0.0	0.0	0.0	0.0	0.0	0.0	0.0	0.0	713.0	1371.0	0.0	0.0	0.0	0.0
6cbe27b7fc5eed8d6daed17ae455f1d6	93.0	170.0	111.0	143.0	0.0	36.0	0.0	0.0	0.0	0.0	230.0	884.0	380.0	0.0
86b999cc481d92c39c2d7e0643fb25ce	0.0	0.0	0.0	0.0	0.0	43.0	229.0	519.0	682.0	553.0	0.0	10.0	0.0	0.0
225881b1a09cd74a675e753c7d6482e1	94.0	431.0	259.0	249.0	0.0	142.0	108.0	88.0	0.0	0.0	125.0	281.0	253.0	0.0
00d4306620fb956f4cb8ea6616da13a3	0.0	0.0	0.0	0.0	0.0	153.0	0.0	146.0	1133.0	591.0	0.0	0.0	0.0	0.0
089da56ed68b4e0f43fdabce794074f1	5.0	372.0	175.0	281.0	1172.0	0.0	0.0	0.0	0.0	0.0	0.0	10.0	0.0	0.0
9f81b529f0ed2f9bfbccee49b97187d3	0.0	21.0	14.0	25.0	0.0	54.0	0.0	0.0	1872.0	26.0	0.0	0.0	0.0	0.0
145c6114e80075523d389e650ee349e4	54.0	42.0	0.0	0.0	0.0	510.0	135.0	103.0	556.0	366.0	74.0	0.0	158.0	0.0
23fb1025702cf06ee85466ea509b3f50	0.0	212.0	111.0	150.0	0.0	27.0	661.0	679.0	36.0	102.0	0.0	0.0	0.0	0.0
874731b48143abc716350a66f6ceb7aa	517.0	0.0	0.0	0.0	0.0	0.0	0.0	0.0	0.0	0.0	576.0	300.0	562.0	0.0
705f5d0a989ba0710a478c1374551909	0.0	42.0	26.0	23.0	0.0	107.0	87.0	700.0	229.0	727.0	0.0	0.0	0.0	0.0
6c420927d268a57526df90a00625bc32	0.0	0.0	33.0	19.0	0.0	93.0	266.0	321.0	710.0	489.0	0.0	0.0	0.0	0.0
84776907a1d77f7ba9ef074fbb2eb86f	35.0	533.0	262.0	290.0	0.0	114.0	139.0	153.0	38.0	25.0	101.0	91.0	134.0	0.0
a9d1fa63d4896a301891704f37fb9884	162.0	311.0	132.0	186.0	0.0	92.0	61.0	79.0	0.0	12.0	302.0	330.0	245.0	0.0
c18423578bc01b00706b60cd784c3425	0.0	0.0	0.0	0.0	0.0	71.0	0.0	0.0	1818.0	13.0	0.0	0.0	0.0	0.0
1b41f15408c9065eddd877a379aedba6	0.0	0.0	0.0	0.0	0.0	24.0	0.0	38.0	1739.0	99.0	0.0	0.0	0.0	0.0
104b747159f842223580038683e5dba4	7.0	479.0	321.0	299.0	0.0	31.0	60.0	205.0	116.0	349.0	9.0	14.0	9.0	0.0
43ef5237004d4c4358fd7997fab872a5	0.0	366.0	203.0	234.0	169.0	0.0	144.0	237.0	122.0	417.0	0.0	0.0	0.0	0.0
bb74771a0d5cfcba20b946048ec4b879	20.0	239.0	131.0	158.0	1219.0	23.0	0.0	0.0	0.0	0.0	25.0	39.0	29.0	6.0
d09a5a2f3481593ed3f4ad877ed08536	0.0	792.0	563.0	534.0	0.0	0.0	0.0	0.0	0.0	0.0	0.0	0.0	0.0	0.0
0268ddf17919bc857a54e4a1655a4e4b	0.0	578.0	317.0	328.0	0.0	61.0	162.0	266.0	30.0	88.0	0.0	23.0	17.0	0.0
f9491c3e6b9696bee439b98d32336180	186.0	53.0	41.0	45.0	13.0	596.0	0.0	119.0	542.0	84.0	77.0	0.0	84.0	0.0
281d156b28a525dea188a61aea8b1f2d	225.0	257.0	184.0	186.0	0.0	70.0	0.0	0.0	0.0	0.0	643.0	125.0	146.0	0.0
b9fd36e399248ace31c2d286d1a1fcd2	0.0	504.0	353.0	399.0	0.0	0.0	351.0	225.0	0.0	0.0	0.0	0.0	0.0	0.0
9ec4187530f3b9073db8875e9551e385	83.0	143.0	94.0	84.0	0.0	72.0	0.0	0.0	0.0	0.0	293.0	378.0	677.0	0.0
5fbdd4b82169ee0ae6c572e71a79049b	0.0	0.0	0.0	0.0	0.0	91.0	0.0	390.0	1001.0	340.0	0.0	0.0	0.0	0.0
224f8177d924045c9b5cd04c250edd08	0.0	762.0	475.0	511.0	0.0	21.0	27.0	0.0	0.0	0.0	0.0	0.0	12.0	0.0
1492f53f9e14475a2b6a7695baa93d06	0.0	821.0	481.0	481.0	0.0	0.0	0.0	0.0	0.0	0.0	0.0	20.0	0.0	0.0
06f6280d6271d356d5e61d6bce8be759	0.0	0.0	0.0	0.0	0.0	77.0	0.0	0.0	0.0	0.0	638.0	516.0	557.0	0.0
ad0bf88826aba1a9b2612db50a8c91f0	61.0	111.0	122.0	96.0	0.0	68.0	0.0	0.0	0.0	0.0	267.0	738.0	323.0	0.0
93f8d28139be91da38fc73f86f32b5c2	0.0	16.0	0.0	0.0	0.0	0.0	0.0	67.0	1557.0	118.0	0.0	0.0	0.0	0.0
4e0639b49b93717ffde253f8bbab880f	13.0	382.0	207.0	228.0	0.0	50.0	46.0	133.0	251.0	413.0	13.0	0.0	15.0	0.0
6743d86267388e74225887defac3e471	0.0	0.0	0.0	0.0	0.0	0.0	0.0	0.0	1746.0	0.0	0.0	3.0	0.0	0.0
fc7b257064027e1bc2b6fbfb4584677d	0.0	0.0	0.0	0.0	0.0	112.0	0.0	175.0	1210.0	231.0	16.0	0.0	0.0	0.0
596dfd6a0a6b17cc5d46a65ab07e5c33	0.0	342.0	261.0	265.0	357.0	0.0	0.0	0.0	0.0	0.0	177.0	137.0	181.0	0.0
b4a21b48ca6397ec82217703c164adc9	202.0	0.0	0.0	0.0	0.0	93.0	0.0	0.0	0.0	0.0	1075.0	100.0	248.0	0.0
d201cbacd1c567ff782a4fefb0caf09b	21.0	163.0	105.0	150.0	0.0	113.0	275.0	415.0	128.0	217.0	61.0	20.0	40.0	0.0
84563fa64fdf865a9854bd2fc11450b1	0.0	48.0	0.0	0.0	0.0	281.0	0.0	0.0	1301.0	61.0	0.0	0.0	0.0	0.0
e76e73dc0167eaad9acd3336d3a6fe57	0.0	0.0	0.0	0.0	0.0	25.0	0.0	0.0	1663.0	0.0	0.0	0.0	0.0	0.0
f053778ac11218db2855b879731e41f6	0.0	801.0	414.0	435.0	0.0	0.0	0.0	26.0	0.0	0.0	0.0	0.0	0.0	0.0
317999165c74566a95b22617a6932402	126.0	0.0	0.0	0.0	0.0	212.0	94.0	71.0	0.0	0.0	287.0	259.0	625.0	0.0
88524108706087f7c75e79d6c10c9c61	0.0	828.0	438.0	406.0	0.0	0.0	0.0	0.0	0.0	0.0	0.0	0.0	0.0	0.0
7359790b9124fa0457b49a6c8d6cd57c	0.0	0.0	0.0	0.0	0.0	252.0	0.0	0.0	1411.0	0.0	0.0	0.0	0.0	0.0
074c72cc39b32c1386dfb891ef361509	0.0	0.0	0.0	0.0	0.0	53.0	0.0	0.0	1581.0	24.0	0.0	0.0	0.0	0.0
e22e50214b91228bf962da281ca23afb	798.0	51.0	27.0	22.0	0.0	0.0	31.0	30.0	0.0	2.0	556.0	56.0	79.0	0.0
d101599ee1ddf18f6cfde88752489fcd	0.0	0.0	0.0	0.0	0.0	19.0	39.0	99.0	803.0	689.0	0.0	0.0	0.0	0.0
2a7705179723c601c792f55602636bda	115.0	96.0	61.0	66.0	0.0	59.0	0.0	0.0	0.0	0.0	383.0	444.0	412.0	0.0
0263d79ba5568fc313b909925a8607ec	0.0	0.0	0.0	0.0	0.0	60.0	0.0	0.0	1568.0	0.0	0.0	0.0	0.0	0.0
8b2b5a2cfd551d398c5ae65f22271372	0.0	43.0	0.0	0.0	0.0	63.0	10.0	36.0	1360.0	98.0	0.0	0.0	0.0	0.0
81bcadac8d516ce6d9b9e274ebd9561f	0.0	0.0	0.0	0.0	0.0	773.0	110.0	362.0	313.0	49.0	0.0	0.0	0.0	0.0
e4278f7eb9e1d1595866d1c4440c78c9	0.0	656.0	434.0	470.0	0.0	0.0	0.0	0.0	0.0	0.0	0.0	0.0	0.0	0.0
8620388bca4ee0e81199264d30247d88	0.0	818.0	376.0	360.0	0.0	0.0	0.0	0.0	0.0	0.0	0.0	0.0	0.0	0.0
25ec277575c4c38dc280e1a28c0fbc15	0.0	503.0	291.0	343.0	0.0	136.0	146.0	110.0	0.0	0.0	0.0	0.0	0.0	0.0
0e1a21f014887edc560531b0c9d0e691	0.0	0.0	0.0	0.0	0.0	57.0	0.0	0.0	1455.0	16.0	0.0	0.0	0.0	0.0
1fa4aecbb95f7fee5facfcbe397fb379	0.0	682.0	372.0	473.0	0.0	0.0	0.0	0.0	0.0	0.0	0.0	0.0	0.0	0.0
9f0f4c5f556233fdb591ff98530d9506	0.0	53.0	31.0	18.0	0.0	72.0	96.0	267.0	205.0	742.0	18.0	0.0	8.0	4.0
ddc675e112b72bef9bd8bbdd384c64f6	43.0	330.0	192.0	229.0	158.0	29.0	150.0	104.0	0.0	44.0	119.0	66.0	46.0	0.0
d2d01dc861fd4b0a6572489b26e9eb1a	0.0	0.0	26.0	28.0	1450.0	0.0	0.0	0.0	0.0	0.0	0.0	0.0	0.0	0.0
b0ee5152837e6dd4bac2d3a08b1207f3	0.0	0.0	0.0	0.0	0.0	351.0	0.0	165.0	64.0	200.0	176.0	228.0	289.0	0.0
4c461166a8c0f8ac6b2d1cf41ed478fd	0.0	0.0	0.0	0.0	0.0	259.0	0.0	90.0	0.0	25.0	386.0	263.0	435.0	0.0
9810504f08e9da99f8d56cab749e6b6c	0.0	0.0	0.0	0.0	0.0	0.0	0.0	0.0	1454.0	0.0	0.0	0.0	0.0	0.0
883db5d084c1d946916056f5e3a64bd6	0.0	98.0	0.0	146.0	0.0	225.0	207.0	387.0	119.0	138.0	123.0	0.0	0.0	0.0
7563eca03e9945c9920f665331059704	4.0	342.0	200.0	239.0	317.0	27.0	111.0	175.0	7.0	8.0	0.0	10.0	0.0	0.0
c505f27afd1308b68eeaff609f036bf4	129.0	0.0	0.0	0.0	0.0	340.0	258.0	134.0	105.0	235.0	155.0	0.0	81.0	0.0
b968fc1f8ed4d7fbacac9d1f3a23ffc4	0.0	329.0	176.0	175.0	629.0	0.0	65.0	62.0	0.0	0.0	0.0	0.0	0.0	0.0
1b3f00da8c05b987c2ade5f7ea1fbf6f	0.0	0.0	0.0	0.0	0.0	37.0	0.0	168.0	529.0	702.0	0.0	0.0	0.0	0.0
9593085a56448844ffca0c8957199b47	0.0	728.0	289.0	380.0	0.0	35.0	0.0	0.0	0.0	0.0	0.0	0.0	0.0	0.0
53a7a37e2eaf51d5e4b53d03edeb116c	12.0	391.0	207.0	200.0	0.0	44.0	66.0	118.0	25.0	72.0	77.0	116.0	99.0	0.0
d9b0f02cba77a6a94a04906170cc9563	111.0	220.0	176.0	178.0	0.0	74.0	65.0	103.0	0.0	0.0	235.0	138.0	114.0	0.0
fcacc1a798bb0322e8cd110c6d8d1011	0.0	0.0	0.0	0.0	0.0	66.0	0.0	0.0	1347.0	0.0	0.0	0.0	0.0	0.0
f22dbe466ab7a6820a3fa8f0c23529d6	0.0	586.0	428.0	396.0	0.0	0.0	0.0	0.0	0.0	0.0	0.0	0.0	0.0	0.0
323e559473b0f1ae7b6c063c047e4e64	0.0	98.0	43.0	51.0	0.0	232.0	0.0	688.0	27.0	174.0	53.0	30.0	10.0	0.0
30ada6e0a5a8b8bd031ed8d03236519a	14.0	55.0	27.0	41.0	0.0	230.0	151.0	200.0	328.0	338.0	21.0	0.0	0.0	0.0
50c1adc394d69456bab0180bd2d25d57	0.0	161.0	73.0	101.0	1068.0	0.0	0.0	0.0	0.0	0.0	0.0	0.0	0.0	0.0
a9360c0a1300c954aefbdaeb9109d345	174.0	6.0	0.0	0.0	0.0	151.0	0.0	0.0	0.0	0.0	264.0	228.0	577.0	0.0
11b50e80047289f589868d85531954f4	0.0	165.0	63.0	74.0	0.0	370.0	0.0	104.0	339.0	277.0	0.0	0.0	0.0	0.0
8dcdccf3d92d187cae8c1655a78b8bd8	37.0	549.0	396.0	326.0	0.0	75.0	0.0	0.0	0.0	0.0	0.0	0.0	0.0	0.0
fecd0294f7ecdb7bc5c54d01e9f541f0	168.0	69.0	46.0	67.0	335.0	46.0	0.0	0.0	0.0	0.0	221.0	314.0	114.0	0.0
eff34b14b4ece9f2c89cdbb1e0bbcd81	0.0	462.0	274.0	281.0	0.0	0.0	65.0	97.0	141.0	57.0	0.0	0.0	0.0	0.0
e990c276fbc1c79a05390fbf6840daf2	0.0	528.0	477.0	324.0	0.0	0.0	0.0	0.0	46.0	0.0	0.0	0.0	0.0	0.0
eac71bc503da96a4e254a9d4252e75f4	0.0	34.0	43.0	43.0	0.0	0.0	0.0	0.0	1232.0	23.0	0.0	0.0	0.0	0.0
53b547b6b5c21d5372846bb3cab09f72	0.0	0.0	0.0	0.0	0.0	65.0	0.0	0.0	1260.0	50.0	0.0	0.0	0.0	0.0
23d2311e0bad97ba4f0f594a781a47fa	183.0	100.0	49.0	57.0	0.0	54.0	7.0	0.0	0.0	0.0	405.0	355.0	163.0	0.0
efbe1f58b1e2984ddc53a64f047d94ff	0.0	157.0	106.0	212.0	871.0	0.0	0.0	0.0	27.0	0.0	0.0	0.0	0.0	0.0
96499df64e068853b5d8715148bb1476	0.0	0.0	0.0	0.0	0.0	26.0	0.0	0.0	1347.0	0.0	0.0	0.0	0.0	0.0
74a23a7905ecbc979af2c844d6586ae1	0.0	0.0	0.0	0.0	0.0	215.0	0.0	109.0	141.0	52.0	139.0	387.0	321.0	0.0
6021bddead0c1155ea2c3f71bbd21cb8	8.0	199.0	148.0	120.0	0.0	42.0	205.0	400.0	75.0	143.0	0.0	0.0	18.0	0.0
b256952de889272b156f03a2be125fab	0.0	0.0	0.0	0.0	0.0	152.0	0.0	0.0	321.0	832.0	31.0	0.0	0.0	0.0
77bcde7c5c86bfffc9b75c9de5a560b8	0.0	192.0	142.0	107.0	0.0	0.0	306.0	469.0	28.0	89.0	0.0	0.0	0.0	0.0
1c0a41b245b48aa722208b4c004c6596	124.0	71.0	89.0	111.0	0.0	144.0	118.0	321.0	0.0	74.0	108.0	88.0	68.0	0.0
715a2269cda2a7f6a00e92ab001c8fdb	0.0	212.0	126.0	164.0	0.0	0.0	214.0	593.0	0.0	0.0	0.0	0.0	0.0	0.0
f4373152f6615c1d09aadd2357be986a	62.0	101.0	34.0	44.0	0.0	108.0	0.0	95.0	123.0	26.0	387.0	61.0	262.0	0.0
1e1535265ac4e69a39e5e28aa8665a55	67.0	0.0	0.0	0.0	0.0	933.0	0.0	0.0	3.0	0.0	140.0	75.0	83.0	0.0
1515800f8d179fd9c4c343fabe898d9a	32.0	430.0	275.0	291.0	0.0	0.0	30.0	18.0	0.0	0.0	57.0	86.0	65.0	0.0
d8b62aa17ccf107f192abf242452db50	0.0	32.0	15.0	26.0	0.0	67.0	103.0	175.0	441.0	403.0	0.0	0.0	0.0	0.0
788e450d1af26126c6217582a3e194ed	0.0	248.0	199.0	194.0	0.0	0.0	0.0	0.0	0.0	0.0	182.0	207.0	226.0	0.0
61803a9c5c16718a20951547b2d2dc4f	0.0	590.0	329.0	299.0	0.0	11.0	0.0	0.0	0.0	0.0	20.0	0.0	0.0	0.0
177d2176a3368f43cc132f9e34a9405c	63.0	322.0	199.0	235.0	0.0	34.0	0.0	0.0	0.0	0.0	158.0	151.0	84.0	0.0
9176a4011d0b5a7a3fe654f25319091e	0.0	13.0	0.0	8.0	0.0	0.0	201.0	957.0	65.0	0.0	0.0	0.0	0.0	0.0
86a602d45fae6ac205481af201a89281	51.0	54.0	0.0	0.0	0.0	725.0	180.0	0.0	0.0	0.0	196.0	0.0	34.0	0.0
4d0a36c5a51e221dfa0b92956bc29a67	74.0	193.0	111.0	113.0	201.0	0.0	0.0	0.0	0.0	0.0	127.0	228.0	190.0	0.0
c67744b93c1aac731ad718596675f25e	22.0	0.0	0.0	0.0	0.0	532.0	50.0	56.0	121.0	288.0	100.0	28.0	40.0	0.0
dc9e4749ecece058eaefcae0b5e4adf3	0.0	106.0	109.0	110.0	907.0	0.0	0.0	0.0	0.0	0.0	0.0	0.0	0.0	0.0
e8aeb250cad9a898bdd9d0e1184ea167	106.0	75.0	53.0	62.0	0.0	30.0	0.0	0.0	0.0	0.0	159.0	464.0	261.0	0.0
83233b11607e6ceeca0bb04473bdb798	0.0	0.0	0.0	0.0	0.0	0.0	0.0	39.0	263.0	897.0	0.0	0.0	0.0	0.0
6228d4a227f9be888bdd0fb45c0a6130	0.0	520.0	308.0	266.0	0.0	0.0	58.0	33.0	0.0	0.0	3.0	0.0	9.0	0.0
d36b3b611aa93a2b40910492cef121d2	0.0	0.0	0.0	0.0	0.0	0.0	857.0	336.0	0.0	0.0	0.0	0.0	0.0	0.0
030ea93a2442cc89dba2162bc1244368	32.0	54.0	20.0	19.0	0.0	26.0	0.0	0.0	0.0	0.0	150.0	654.0	231.0	0.0
68b19236ddb8fc16d035a06ae6b296b8	0.0	451.0	285.0	336.0	0.0	43.0	0.0	0.0	0.0	0.0	10.0	34.0	27.0	0.0
8cff7bc3fb5f7586f26e4837583cb108	54.0	219.0	0.0	0.0	0.0	82.0	0.0	0.0	0.0	0.0	312.0	315.0	200.0	0.0
8eca9f01875c37563054a2ce6358de53	11.0	0.0	0.0	0.0	0.0	0.0	0.0	0.0	0.0	0.0	0.0	1171.0	0.0	0.0
25113574da75009664fe57dcc858c184	0.0	112.0	0.0	74.0	978.0	0.0	0.0	0.0	0.0	0.0	0.0	0.0	0.0	8.0
f048e796110007f74363c16ae29f9eaf	0.0	0.0	0.0	0.0	0.0	0.0	97.0	34.0	694.0	346.0	0.0	0.0	0.0	0.0
299cd0a15535a512e163064720e52049	0.0	0.0	0.0	0.0	0.0	0.0	0.0	0.0	1131.0	37.0	0.0	0.0	0.0	0.0
9130ba5d659e6338e841ef4c65deba28	0.0	0.0	0.0	0.0	0.0	0.0	0.0	0.0	1123.0	44.0	0.0	0.0	0.0	0.0
eefff0223ce7d1107aac1de39297e175	0.0	77.0	40.0	45.0	0.0	35.0	76.0	139.0	190.0	558.0	0.0	0.0	4.0	0.0
90aa9af64338436aa5817c4861fdd4b0	0.0	378.0	328.0	319.0	0.0	53.0	31.0	52.0	0.0	0.0	0.0	0.0	0.0	0.0
3e1a26e59596ea4b27910d21a7f2685f	0.0	0.0	0.0	0.0	0.0	31.0	0.0	16.0	454.0	658.0	0.0	0.0	0.0	0.0
5a5620cf1d95d4626397b5fe71892e0a	76.0	53.0	0.0	0.0	0.0	332.0	92.0	60.0	27.0	146.0	228.0	48.0	96.0	0.0
02a021a4a33ccd51f4b020422088397b	65.0	0.0	0.0	0.0	0.0	807.0	24.0	20.0	0.0	0.0	85.0	95.0	59.0	0.0
1e892adf45bea4cbc34c94b4df1a7f87	3.0	481.0	290.0	333.0	0.0	34.0	13.0	0.0	0.0	0.0	0.0	0.0	0.0	0.0
15d33303de8a2df0d68b1f0c198e38e4	11.0	23.0	19.0	0.0	0.0	54.0	10.0	180.0	360.0	477.0	0.0	0.0	0.0	0.0
75ba6f1992139fb3fe848d91a1721d29	4.0	377.0	245.0	239.0	0.0	16.0	93.0	94.0	20.0	18.0	0.0	12.0	9.0	0.0
d23f0c0c17f5cd175eb55b714d094393	0.0	116.0	81.0	78.0	0.0	0.0	282.0	345.0	48.0	163.0	0.0	0.0	0.0	0.0
811eb9d850c96de0234a2000f731c2e5	23.0	278.0	152.0	175.0	0.0	20.0	0.0	0.0	0.0	0.0	109.0	260.0	85.0	0.0
3b29656fafebe2fbca061ed249f7fdf6	53.0	301.0	176.0	198.0	0.0	10.0	0.0	0.0	0.0	0.0	131.0	145.0	86.0	0.0
5b328106196bf21a3329ee24296278b0	106.0	65.0	58.0	47.0	0.0	275.0	52.0	0.0	0.0	0.0	283.0	112.0	99.0	0.0
7987aaa1343fa88df0c87e81b3f26c41	0.0	0.0	0.0	0.0	0.0	133.0	0.0	0.0	964.0	0.0	0.0	0.0	0.0	0.0
6b08b339298c086bfac594e0044a1107	0.0	92.0	72.0	75.0	0.0	119.0	81.0	166.0	253.0	233.0	0.0	0.0	0.0	0.0
f2d4e9e8e9bc07e40b9d21ab8d86f4c9	0.0	0.0	0.0	0.0	0.0	0.0	0.0	18.0	959.0	112.0	0.0	0.0	0.0	0.0
5183d97b2862d0ab4cacfd081ab5d0fe	88.0	68.0	40.0	58.0	0.0	99.0	128.0	98.0	135.0	37.0	127.0	106.0	99.0	0.0
f246c43c55c157fc80e9fed0198044cb	0.0	0.0	0.0	0.0	0.0	0.0	0.0	0.0	281.0	802.0	0.0	0.0	0.0	0.0
d3a5ff055babaeeea425e69e726c5255	0.0	34.0	11.0	32.0	0.0	59.0	172.0	265.0	187.0	316.0	0.0	6.0	0.0	0.0
ab6933b6130d806e6db6980c3b8ed0fa	0.0	0.0	0.0	0.0	0.0	23.0	0.0	0.0	1046.0	7.0	0.0	0.0	0.0	0.0
02d22cf5cd8f11940eceb737041f682c	0.0	0.0	0.0	0.0	0.0	90.0	0.0	0.0	941.0	44.0	0.0	0.0	0.0	0.0
19bf0c1b9f4d2805e5df22736695b103	0.0	0.0	0.0	8.0	0.0	0.0	0.0	0.0	955.0	106.0	0.0	0.0	0.0	0.0
307ddec3c7707da5e8a62de70cab1274	101.0	65.0	19.0	25.0	0.0	0.0	0.0	0.0	0.0	0.0	247.0	444.0	163.0	0.0
ef26130c65d1473e1cb861510769ced0	120.0	135.0	70.0	93.0	0.0	60.0	0.0	0.0	0.0	0.0	279.0	150.0	150.0	0.0
7876a5906e5be58d068237cd0b6ebb3c	0.0	0.0	0.0	0.0	1052.0	0.0	0.0	0.0	0.0	0.0	0.0	0.0	0.0	4.0
54f6e509d190e327d144a3ae92e1e73a	76.0	0.0	0.0	0.0	0.0	0.0	0.0	0.0	0.0	14.0	430.0	184.0	350.0	0.0
7cdbc15174302c59a8ceeb73fbb34a93	12.0	420.0	300.0	271.0	0.0	0.0	0.0	0.0	0.0	0.0	13.0	24.0	14.0	0.0
1f2be97caa9599dc6fd1521953734180	90.0	41.0	19.0	22.0	0.0	130.0	97.0	69.0	124.0	136.0	170.0	104.0	47.0	0.0
289a6cadbce19316f21ed2f7133f940d	0.0	44.0	42.0	27.0	0.0	77.0	37.0	591.0	41.0	187.0	0.0	0.0	0.0	0.0
769469d3afeada5190f45352f848faf0	0.0	19.0	0.0	0.0	0.0	0.0	21.0	120.0	202.0	684.0	0.0	0.0	0.0	0.0
43e3f9686e7c3bfcc879e76488e5b8eb	49.0	194.0	93.0	121.0	28.0	102.0	95.0	82.0	86.0	86.0	63.0	46.0	0.0	0.0
c191261eecdb2363498ade5aaa7c186a	62.0	155.0	129.0	101.0	0.0	29.0	137.0	65.0	0.0	0.0	122.0	90.0	154.0	0.0
f7e80d8a8a88ee12a62cbb6b04b1bdac	106.0	124.0	0.0	84.0	0.0	0.0	0.0	0.0	0.0	0.0	201.0	307.0	218.0	0.0
c45486e332113011f595d0edd05e6fc1	0.0	139.0	88.0	86.0	0.0	50.0	241.0	147.0	89.0	199.0	0.0	0.0	0.0	0.0
711287bfc8816a864204f4cb9a694d81	0.0	0.0	0.0	0.0	0.0	22.0	0.0	10.0	796.0	209.0	2.0	0.0	0.0	0.0
66e82bd4fc1592273c395aebba662763	0.0	535.0	242.0	249.0	0.0	0.0	0.0	0.0	0.0	0.0	0.0	0.0	0.0	0.0
4e88579530afedc3ba64c33a96a9e9d6	0.0	28.0	14.0	13.0	0.0	0.0	80.0	249.0	308.0	330.0	0.0	0.0	0.0	0.0
c9232b7bd92e5d869d1770f7f4050ca2	59.0	78.0	51.0	39.0	0.0	72.0	130.0	104.0	12.0	39.0	111.0	146.0	174.0	0.0
4d5467aeaa75e026c74956f5af397574	0.0	89.0	66.0	67.0	0.0	42.0	91.0	194.0	265.0	187.0	10.0	0.0	0.0	0.0
dea20621e5551f748e3311e0e6d41f33	0.0	393.0	309.0	297.0	0.0	0.0	0.0	0.0	0.0	0.0	0.0	3.0	0.0	0.0
049c81252a518dddbb32501bf03f514a	0.0	0.0	0.0	0.0	0.0	165.0	0.0	97.0	601.0	139.0	0.0	0.0	0.0	0.0
107273e73071282e4d0f4a0b46548da5	0.0	16.0	17.0	94.0	738.0	61.0	0.0	0.0	61.0	0.0	0.0	0.0	0.0	0.0
91df70c958165f68ade772bfabcb826a	0.0	166.0	89.0	84.0	0.0	13.0	111.0	285.0	49.0	189.0	0.0	0.0	0.0	0.0
6828d9045ff96d05afe4b80767b46542	0.0	0.0	0.0	0.0	0.0	0.0	0.0	0.0	980.0	0.0	0.0	0.0	0.0	0.0
9d99b12f8381b775f7edd3648e9eb685	0.0	440.0	266.0	272.0	0.0	0.0	0.0	0.0	0.0	0.0	0.0	0.0	0.0	0.0
ddd1e6d12c9918e209d5e13b78176d9f	0.0	240.0	138.0	157.0	0.0	25.0	206.0	207.0	0.0	0.0	0.0	0.0	0.0	0.0
455daf5f34bb6ce383f8c63ed5e803cf	38.0	347.0	177.0	230.0	0.0	52.0	0.0	0.0	0.0	0.0	62.0	25.0	38.0	0.0
f672aa3aea2d03f0b297739022e9b716	0.0	34.0	16.0	0.0	0.0	21.0	0.0	52.0	646.0	200.0	0.0	0.0	0.0	0.0
1a4f7d19c258bccf264fb13efefe3786	0.0	397.0	270.0	286.0	0.0	0.0	0.0	0.0	0.0	0.0	7.0	0.0	0.0	0.0
6dbcac935416e6abf7de146d2c3480d8	0.0	0.0	0.0	0.0	0.0	0.0	144.0	0.0	696.0	118.0	0.0	0.0	0.0	0.0
9e560c6d4561a75e2ec7194da5e942eb	43.0	99.0	45.0	49.0	0.0	306.0	169.0	89.0	14.0	22.0	27.0	30.0	63.0	0.0
2a19a73c06d11bf6d14d021db39165ea	0.0	196.0	103.0	147.0	0.0	48.0	210.0	200.0	0.0	52.0	0.0	0.0	0.0	0.0
8741b8bca3a0450b2d57b22df7472681	15.0	180.0	92.0	98.0	0.0	26.0	114.0	175.0	74.0	149.0	0.0	10.0	20.0	0.0
9e6c74996690d3c5e03f3c1ab168a2b9	0.0	83.0	31.0	32.0	0.0	54.0	63.0	68.0	569.0	31.0	0.0	0.0	0.0	0.0
f9e864a4b56320d9a9d165537511a13a	0.0	283.0	97.0	126.0	0.0	65.0	57.0	157.0	88.0	57.0	0.0	0.0	0.0	0.0
700ffbf9345fbe312a574a0db27d6634	0.0	0.0	0.0	0.0	0.0	0.0	0.0	0.0	926.0	0.0	0.0	0.0	0.0	0.0
de217d3df0f64871d6e5bb9d105aeee4	0.0	0.0	0.0	0.0	0.0	0.0	0.0	0.0	922.0	0.0	0.0	0.0	0.0	0.0
abd34643df4e48940286e05ff8518132	0.0	0.0	0.0	0.0	914.0	0.0	0.0	0.0	0.0	0.0	0.0	0.0	0.0	0.0
a10603a4e83ecc0232d9def2a1ec368c	0.0	0.0	0.0	0.0	0.0	0.0	0.0	0.0	363.0	543.0	0.0	0.0	0.0	0.0
263b10740ac9469073d6c544f895b9d0	51.0	210.0	151.0	182.0	0.0	151.0	0.0	0.0	0.0	0.0	65.0	59.0	32.0	0.0
03509702bb8b191d22709cd052e4612a	0.0	0.0	0.0	0.0	0.0	164.0	0.0	0.0	735.0	0.0	0.0	0.0	0.0	0.0
77ba425e2961f299d8d7b83922702d85	121.0	0.0	0.0	0.0	0.0	0.0	0.0	0.0	0.0	0.0	203.0	82.0	492.0	0.0
b596f176ec080cf5ed86e74b889fc0cf	0.0	0.0	0.0	0.0	0.0	0.0	172.0	131.0	397.0	198.0	0.0	0.0	0.0	0.0
db4abe68382f1a544c6d2c2645a33bda	0.0	0.0	14.0	0.0	0.0	0.0	0.0	0.0	883.0	0.0	0.0	0.0	0.0	0.0
61130f51b6bcbf8a0951ab51792f7f5b	0.0	441.0	191.0	235.0	0.0	0.0	0.0	0.0	0.0	0.0	0.0	27.0	0.0	0.0
f0b0b948f6334a8c1fe7355e7412efbd	144.0	0.0	0.0	0.0	0.0	592.0	48.0	0.0	0.0	0.0	8.0	83.0	18.0	0.0
489b6644c4208ce92217ef4ad8f646e7	101.0	0.0	0.0	0.0	0.0	43.0	0.0	0.0	0.0	0.0	253.0	235.0	258.0	0.0
3122109a0af5929c4284ed3b1c81d754	14.0	165.0	117.0	119.0	0.0	14.0	0.0	0.0	0.0	0.0	40.0	312.0	107.0	0.0
026b68ad384fbb3f5bb0f6769b1b4fce	0.0	460.0	111.0	273.0	0.0	0.0	0.0	0.0	0.0	29.0	0.0	0.0	8.0	0.0
7f862d47af52669cc0105ef893caaf4e	63.0	107.0	74.0	94.0	0.0	486.0	0.0	0.0	0.0	0.0	0.0	0.0	48.0	0.0
642d71d15ee5a8398071748ae5081d4d	0.0	0.0	0.0	0.0	0.0	371.0	0.0	0.0	41.0	207.0	182.0	33.0	29.0	0.0
a630681ba72a80c92a426efb3e574ab2	54.0	64.0	42.0	40.0	0.0	116.0	0.0	0.0	0.0	0.0	198.0	237.0	109.0	0.0
08d4568b79f9cb57259541d3aee781eb	60.0	0.0	0.0	0.0	0.0	59.0	330.0	0.0	0.0	55.0	243.0	0.0	112.0	0.0
b220c13a0d6740ff5da2e45ed5bfb950	0.0	0.0	0.0	0.0	0.0	0.0	0.0	15.0	684.0	146.0	14.0	0.0	0.0	0.0
714be112323a3bc4355501d0ddac0251	0.0	0.0	0.0	0.0	0.0	0.0	0.0	0.0	853.0	0.0	0.0	0.0	0.0	0.0
339a3f77df2144a14813a65bf44d8463	58.0	192.0	150.0	147.0	0.0	0.0	0.0	0.0	0.0	0.0	114.0	94.0	96.0	0.0
5380732d6372b0e846e11622d86bba79	0.0	367.0	247.0	237.0	0.0	0.0	0.0	0.0	0.0	0.0	0.0	0.0	0.0	0.0
2cbae23f14af7a963b78d65269f4e0c1	0.0	0.0	0.0	0.0	0.0	289.0	0.0	117.0	151.0	294.0	0.0	0.0	0.0	0.0
0b36c352632cb1346cdc7d73f9fb376c	0.0	0.0	42.0	42.0	755.0	0.0	0.0	0.0	0.0	0.0	0.0	0.0	0.0	0.0
f3db585586bae012e49c0880af1aac8b	0.0	0.0	0.0	0.0	0.0	0.0	0.0	23.0	781.0	30.0	0.0	0.0	0.0	0.0
6502fcacc541cb84fa90daae75026392	0.0	21.0	0.0	10.0	0.0	62.0	43.0	120.0	425.0	151.0	0.0	0.0	0.0	0.0
31c10dc8f10983cc9325a87798f94806	0.0	0.0	0.0	0.0	0.0	38.0	0.0	0.0	793.0	0.0	0.0	0.0	0.0	0.0
d7348b86110af99c20176a0c0aa0697a	0.0	0.0	0.0	0.0	827.0	0.0	0.0	0.0	0.0	0.0	0.0	0.0	0.0	0.0
8305d9d9d69fa0ba570c9f0a123d1c2c	0.0	294.0	152.0	187.0	0.0	6.0	97.0	47.0	0.0	0.0	0.0	21.0	22.0	0.0
c5efb064be95f78eedc44aa3fea8efb6	0.0	0.0	0.0	0.0	0.0	0.0	0.0	0.0	629.0	195.0	0.0	0.0	0.0	0.0
80b6df7798b22dde6f51dd49a7a4a48d	0.0	214.0	139.0	101.0	0.0	139.0	42.0	68.0	114.0	0.0	0.0	0.0	0.0	0.0
f0bc65c62a99017dcd039d76236bd653	0.0	0.0	0.0	0.0	103.0	0.0	0.0	0.0	0.0	0.0	0.0	0.0	0.0	705.0
d1846621d56307859a8d6c6bf12e33cd	0.0	0.0	0.0	0.0	0.0	0.0	0.0	63.0	188.0	557.0	0.0	0.0	0.0	0.0
711f081c1bf01659d13ef033a77941a9	0.0	0.0	8.0	7.0	0.0	757.0	16.0	0.0	0.0	0.0	13.0	0.0	0.0	0.0
02e2f53ad22208ea596141447c3d6d3f	159.0	0.0	0.0	0.0	0.0	312.0	0.0	0.0	0.0	0.0	121.0	51.0	147.0	0.0
2525cce7e0f7a01030af16fbe7465cb9	0.0	0.0	0.0	0.0	0.0	0.0	0.0	0.0	789.0	0.0	0.0	0.0	0.0	0.0
71dab74886a66f8d105ae7b9011af1c1	39.0	0.0	0.0	0.0	0.0	0.0	142.0	0.0	0.0	0.0	328.0	151.0	127.0	0.0
feae08080074243344a12135bb67ed48	0.0	0.0	0.0	0.0	0.0	18.0	0.0	0.0	760.0	8.0	0.0	0.0	0.0	0.0
396b3787848ca962a7fd5027d414a602	131.0	123.0	104.0	103.0	0.0	0.0	0.0	0.0	0.0	0.0	143.0	78.0	100.0	0.0
cdfb2c9e02e4f387c02256cafdcbeeec	103.0	86.0	86.0	85.0	0.0	87.0	0.0	0.0	0.0	0.0	186.0	86.0	54.0	0.0
87129c2dfca144e9853262940180cb49	59.0	114.0	45.0	68.0	0.0	213.0	0.0	0.0	0.0	0.0	67.0	51.0	154.0	0.0
6eeac56016f0c8eb423b94d70b212340	0.0	199.0	155.0	177.0	73.0	0.0	96.0	71.0	0.0	0.0	0.0	0.0	0.0	0.0
92be318f0f07d5cfc6ecc0d2d1e8ab0f	30.0	221.0	120.0	114.0	0.0	86.0	31.0	20.0	0.0	0.0	51.0	53.0	44.0	0.0
764f1165154214933a36f43cae05bff2	89.0	13.0	0.0	0.0	0.0	27.0	12.0	0.0	0.0	0.0	183.0	36.0	407.0	0.0
ad53576cccb4fb7af5597cb3f5168ab2	0.0	0.0	0.0	0.0	0.0	0.0	0.0	0.0	767.0	0.0	0.0	0.0	0.0	0.0
dd361ff8e55a94f564c69d4c902931ba	0.0	0.0	0.0	0.0	0.0	0.0	0.0	0.0	765.0	0.0	0.0	0.0	0.0	0.0
19ea34eba18e85f90f1c035f1f190c8c	0.0	0.0	0.0	0.0	0.0	0.0	0.0	0.0	755.0	0.0	8.0	0.0	0.0	0.0
86bf6ba2593a73582d40e0f60762cff8	34.0	92.0	58.0	93.0	0.0	68.0	123.0	191.0	0.0	20.0	31.0	28.0	20.0	0.0
f4e36f5140f1efd71dcfe632bde1be99	28.0	24.0	0.0	15.0	0.0	357.0	21.0	0.0	0.0	0.0	227.0	0.0	86.0	0.0
143fe92e7da7f83aaf362fc2eaf565b1	0.0	0.0	0.0	0.0	0.0	0.0	4.0	55.0	221.0	467.0	0.0	0.0	0.0	0.0
f43dadc62dfeb01a5dc6bab930da8fe2	0.0	0.0	0.0	0.0	0.0	0.0	0.0	0.0	731.0	16.0	0.0	0.0	0.0	0.0
12f93fd9b3c0aaf8cde51e7bf0f74809	0.0	317.0	235.0	168.0	0.0	0.0	0.0	23.0	0.0	0.0	0.0	0.0	0.0	0.0
e7fdc3a6161ae359357405b792272287	0.0	264.0	144.0	167.0	0.0	25.0	67.0	73.0	0.0	0.0	0.0	3.0	0.0	0.0
945184b6386c192c0066e0a98a154780	0.0	0.0	0.0	0.0	735.0	0.0	0.0	0.0	8.0	0.0	0.0	0.0	0.0	0.0
67bd9a9de6811d380d06bb849bb989d3	13.0	0.0	0.0	0.0	0.0	0.0	0.0	0.0	0.0	0.0	0.0	725.0	0.0	0.0
e416d0916760d2fc17b616e2ac3ad855	0.0	269.0	0.0	193.0	0.0	0.0	0.0	162.0	0.0	112.0	0.0	0.0	0.0	0.0
12821ca4320ce987692671ed49698823	0.0	395.0	160.0	173.0	0.0	0.0	0.0	0.0	0.0	0.0	0.0	0.0	0.0	0.0
369d9ec37fe21575c7ed2d201ab49e41	0.0	316.0	199.0	147.0	0.0	27.0	6.0	23.0	0.0	0.0	6.0	0.0	3.0	0.0
d3e4200682dd7d4ec88c791ce99de418	0.0	0.0	0.0	0.0	0.0	194.0	23.0	102.0	161.0	243.0	0.0	0.0	0.0	0.0
be04e5a5f333faeeb89b7922cc154ccb	48.0	34.0	0.0	34.0	0.0	105.0	0.0	117.0	213.0	59.0	109.0	0.0	0.0	0.0
ce62e47609239ad800a10538cfbcdfe3	0.0	0.0	0.0	0.0	0.0	0.0	462.0	53.0	133.0	69.0	0.0	0.0	0.0	0.0
fdf458a8bf75577b46f6dd9ea350de51	267.0	4.0	2.0	0.0	0.0	0.0	0.0	0.0	0.0	0.0	280.0	69.0	93.0	0.0
37039d713cf162569fff657df0aa3db7	0.0	270.0	179.0	161.0	0.0	32.0	40.0	24.0	0.0	0.0	0.0	0.0	9.0	0.0
c06ccd1f7d57566ef669942328b1a946	0.0	0.0	0.0	0.0	587.0	0.0	0.0	0.0	0.0	0.0	0.0	0.0	0.0	128.0
9302518dc0f83dcb8115a0da465ef86b	0.0	23.0	13.0	13.0	0.0	0.0	389.0	276.0	0.0	0.0	0.0	0.0	0.0	0.0
66804a3c3e40f8572119e3c624478909	0.0	0.0	0.0	0.0	0.0	87.0	0.0	0.0	105.0	0.0	454.0	0.0	66.0	0.0
a8461aebe29fae1d18b7b06fbb80ebcd	69.0	235.0	158.0	121.0	0.0	20.0	0.0	0.0	0.0	0.0	85.0	10.0	13.0	0.0
e5175a883565c1a9e1cb62921bbd4fb0	0.0	140.0	83.0	62.0	0.0	23.0	0.0	0.0	20.0	34.0	94.0	34.0	218.0	0.0
534392c0b002e6d28584cd12cfcf23c4	79.0	0.0	0.0	0.0	0.0	516.0	54.0	0.0	0.0	0.0	0.0	40.0	16.0	0.0
6076eddd6fff7320e876df06d707d7b5	74.0	129.0	39.0	58.0	0.0	89.0	0.0	0.0	0.0	0.0	139.0	0.0	177.0	0.0
a53dd8e7d632f06f64bd3bd4747b2a72	0.0	300.0	200.0	205.0	0.0	0.0	0.0	0.0	0.0	0.0	0.0	0.0	0.0	0.0
e8bf5aff39fc303f8c5d4c6a8dd71ffc	32.0	29.0	0.0	6.0	0.0	11.0	0.0	0.0	0.0	0.0	132.0	345.0	148.0	0.0
9ce7e697367499c26f59258e4719af51	0.0	333.0	189.0	172.0	0.0	0.0	0.0	0.0	0.0	0.0	0.0	0.0	7.0	0.0
d43a95f7bdbfd687e0e997ad06ca2547	0.0	396.0	135.0	167.0	0.0	0.0	0.0	0.0	0.0	0.0	0.0	0.0	0.0	0.0
6bd27c79f2f053d5c5f10f9d3fe0f7a9	0.0	310.0	180.0	205.0	0.0	0.0	0.0	0.0	0.0	0.0	0.0	0.0	0.0	0.0
9a6e6795ff9455c12a7edc9ac9101298	0.0	209.0	110.0	122.0	0.0	0.0	145.0	109.0	0.0	0.0	0.0	0.0	0.0	0.0
3f19af34207a13e1bd370800c384243e	47.0	75.0	41.0	68.0	0.0	37.0	68.0	132.0	24.0	74.0	60.0	22.0	45.0	0.0
edcfb96c9964f3f9dc6f0621861a0b2f	0.0	175.0	82.0	80.0	0.0	0.0	0.0	0.0	353.0	0.0	0.0	0.0	0.0	0.0
ee60fa74cfed85fc1b068ec55c4c914f	0.0	0.0	0.0	0.0	0.0	0.0	0.0	272.0	261.0	151.0	0.0	0.0	0.0	0.0
0a714b58e2dff1c534b4be7a8550bec3	0.0	0.0	0.0	0.0	0.0	57.0	91.0	247.0	116.0	171.0	0.0	0.0	0.0	0.0
63f795bac9c53369ac0fc7b5ad0310dd	83.0	37.0	0.0	35.0	0.0	43.0	0.0	0.0	0.0	0.0	267.0	65.0	151.0	0.0
1c2b8892a0d7f828d72808cd01cfd199	0.0	68.0	60.0	53.0	0.0	72.0	44.0	47.0	143.0	181.0	11.0	0.0	0.0	0.0
76a2e443105acc53d3461f176f38148c	0.0	382.0	147.0	147.0	0.0	0.0	0.0	0.0	0.0	0.0	0.0	0.0	0.0	0.0
9c3845dea934dab61f85a6661507fa24	0.0	283.0	124.0	127.0	0.0	0.0	0.0	0.0	129.0	13.0	0.0	0.0	0.0	0.0
72ff06d7d5fb8729cf51f402d70f9053	0.0	73.0	46.0	60.0	0.0	0.0	116.0	94.0	177.0	110.0	0.0	0.0	0.0	0.0
7594f38f59d8e84fb104aa1c0b78b56d	0.0	293.0	186.0	162.0	0.0	0.0	0.0	0.0	0.0	0.0	29.0	0.0	0.0	0.0
9ffc43ec363946c10b7c3c0ee609e8ee	0.0	295.0	197.0	172.0	0.0	0.0	0.0	0.0	2.0	0.0	0.0	0.0	3.0	0.0
baf2f45784ce24686cf168244270132f	0.0	266.0	165.0	151.0	0.0	0.0	0.0	0.0	0.0	0.0	0.0	84.0	0.0	0.0
ba5cb035ede71fd21372ed91d9d5b40c	24.0	0.0	0.0	0.0	0.0	0.0	0.0	0.0	0.0	0.0	156.0	392.0	90.0	0.0
14d0116054d2e60f03267fb780c98c18	19.0	127.0	73.0	92.0	0.0	33.0	80.0	108.0	0.0	0.0	34.0	39.0	56.0	0.0
14d871012c77b1e91a346e28d30b8883	0.0	244.0	147.0	159.0	0.0	0.0	24.0	34.0	0.0	0.0	13.0	8.0	23.0	0.0
695261201aac8d5f147674e275b4dc18	0.0	0.0	0.0	0.0	0.0	67.0	0.0	0.0	553.0	31.0	0.0	0.0	0.0	0.0
715ed60e859700522eb8ce8e0b100611	0.0	166.0	0.0	0.0	0.0	0.0	184.0	0.0	0.0	0.0	174.0	126.0	0.0	0.0
680aa3a44fcc29b335a83fc9cb7ca987	0.0	0.0	0.0	0.0	0.0	0.0	0.0	0.0	650.0	0.0	0.0	0.0	0.0	0.0
7580ff42ec296410fd9b751933c26164	0.0	0.0	0.0	120.0	0.0	184.0	0.0	0.0	116.0	0.0	119.0	110.0	0.0	0.0
100c2a43ee71e19b2d15def65bbbddf1	0.0	100.0	61.0	60.0	0.0	206.0	27.0	0.0	0.0	0.0	80.0	52.0	59.0	0.0
772e09779f3ebd9b6b51126873c0378a	0.0	0.0	0.0	0.0	0.0	0.0	0.0	22.0	354.0	269.0	0.0	0.0	0.0	0.0
fc27c909d92c30000f2fce40bdda1cf7	33.0	0.0	0.0	17.0	0.0	18.0	0.0	0.0	0.0	0.0	116.0	434.0	26.0	0.0
c0b60f6bcb93682457555eb02b53d965	0.0	0.0	0.0	0.0	0.0	0.0	340.0	185.0	0.0	0.0	0.0	0.0	118.0	0.0
669a8cbc4c3018bdd25d7ae1afd409d1	0.0	117.0	84.0	61.0	0.0	0.0	235.0	145.0	0.0	0.0	0.0	0.0	0.0	0.0
7e403a048ec8502d08dc87d27ebd86c0	34.0	167.0	73.0	86.0	0.0	43.0	0.0	15.0	15.0	0.0	96.0	78.0	33.0	0.0
dbbb18489236a080a92626787e624382	0.0	453.0	75.0	110.0	0.0	0.0	0.0	0.0	0.0	0.0	0.0	0.0	0.0	0.0
735e9fc92ac3c0978c6ebf1e8ba4f84b	0.0	0.0	0.0	0.0	0.0	63.0	0.0	0.0	544.0	29.0	0.0	0.0	0.0	0.0
a21c7012860561e8cf070207974bdc9e	100.0	74.0	0.0	0.0	0.0	50.0	0.0	0.0	0.0	0.0	265.0	0.0	146.0	0.0
18327f6bf95c7830dd035c9a80f2c944	36.0	65.0	44.0	57.0	0.0	85.0	0.0	0.0	0.0	8.0	131.0	33.0	172.0	0.0
1906cebeebf6a1d245e871f13bdf7284	0.0	85.0	60.0	39.0	0.0	0.0	210.0	237.0	0.0	0.0	0.0	0.0	0.0	0.0
0450b28abc45714f2c2e3b2f30bbb4cf	19.0	63.0	45.0	30.0	0.0	155.0	156.0	79.0	0.0	0.0	17.0	17.0	49.0	0.0
8b7ba0417c04b1d8884a0d23fd739807	0.0	0.0	0.0	0.0	0.0	23.0	239.0	368.0	0.0	0.0	0.0	0.0	0.0	0.0
2a0e81bcec476d431d9a3c840cc7c882	0.0	0.0	0.0	0.0	0.0	108.0	234.0	185.0	72.0	22.0	0.0	0.0	0.0	0.0
b4154677c5f887540c422878cd57bc88	0.0	260.0	154.0	158.0	0.0	0.0	31.0	17.0	0.0	0.0	0.0	0.0	0.0	0.0
c9eeb9179e405b1fd7846a8aefb864d1	0.0	156.0	95.0	92.0	0.0	144.0	0.0	111.0	0.0	21.0	0.0	0.0	0.0	0.0
ffd660f96ba6668b2d8d86fc4e150862	0.0	85.0	59.0	46.0	0.0	52.0	28.0	25.0	255.0	56.0	0.0	0.0	8.0	0.0
3c8a9630951999d2b809868618b05848	98.0	45.0	26.0	30.0	0.0	87.0	0.0	0.0	0.0	28.0	186.0	73.0	39.0	0.0
dd3feb8bca4f233f9df1a182c90ff495	0.0	0.0	0.0	0.0	0.0	0.0	0.0	62.0	444.0	105.0	0.0	0.0	0.0	0.0
07f99fb784f40642f9713e217b9008d1	114.0	40.0	12.0	0.0	0.0	57.0	61.0	50.0	91.0	64.0	50.0	17.0	53.0	0.0
722d90b4d8cd75783d8f72dba7d98990	0.0	253.0	146.0	184.0	0.0	0.0	9.0	11.0	0.0	0.0	0.0	0.0	0.0	0.0
f50ad61a58c377f95b85f92d99bef694	0.0	301.0	139.0	162.0	0.0	0.0	0.0	0.0	0.0	0.0	0.0	0.0	0.0	0.0
8c2b832dd5491a40a79aea2525e54341	0.0	208.0	124.0	144.0	0.0	0.0	34.0	21.0	71.0	0.0	0.0	0.0	0.0	0.0
d71daaac8e969973bdcb093d80cb2120	0.0	0.0	0.0	0.0	0.0	522.0	12.0	0.0	0.0	54.0	12.0	0.0	0.0	0.0
4d41a4ed03379c7d2cefbecb9f1f5445	0.0	262.0	109.0	102.0	0.0	0.0	0.0	0.0	125.0	0.0	0.0	0.0	0.0	0.0
33089d0f8706717f3ed8584f42026164	0.0	143.0	124.0	110.0	0.0	0.0	83.0	112.0	0.0	26.0	0.0	0.0	0.0	0.0
270460c5276511b5f9bde34023fbfd3f	57.0	95.0	63.0	60.0	0.0	50.0	0.0	0.0	0.0	0.0	113.0	96.0	60.0	0.0
9ab3a54e5cefa6a766fde0d8c304769f	0.0	0.0	0.0	0.0	0.0	37.0	0.0	112.0	171.0	274.0	0.0	0.0	0.0	0.0
761e987e9cff3fbfbe5298dd19dacc3e	0.0	61.0	36.0	41.0	0.0	37.0	92.0	177.0	25.0	124.0	0.0	0.0	0.0	0.0
bc210d595c23db321d9394bdc0162ab4	0.0	0.0	0.0	0.0	0.0	0.0	0.0	0.0	592.0	0.0	0.0	0.0	0.0	0.0
e0f851834109c7fbf1a1c8b6d9fd4687	0.0	220.0	135.0	107.0	0.0	0.0	43.0	86.0	0.0	0.0	0.0	0.0	0.0	0.0
d50ddb56e7b32ca8f542f01ae9c7196a	0.0	0.0	0.0	0.0	0.0	0.0	0.0	0.0	591.0	0.0	0.0	0.0	0.0	0.0
878e76530d10cbd94c7a7ceeebd7eba5	0.0	241.0	134.0	144.0	0.0	0.0	43.0	28.0	0.0	0.0	0.0	0.0	0.0	0.0
87f7b9254c4136c088ed7078e9d32241	0.0	0.0	0.0	0.0	0.0	0.0	7.0	37.0	519.0	26.0	0.0	0.0	0.0	0.0
ec5abb0a31e9b17a634c132fdf72b153	0.0	260.0	170.0	156.0	0.0	0.0	0.0	0.0	0.0	0.0	0.0	0.0	0.0	0.0
ad72127c01dac114c005c83404612b5d	18.0	152.0	75.0	67.0	0.0	183.0	0.0	21.0	0.0	0.0	43.0	10.0	14.0	0.0
4856e07a21f6a60b639fa9c694687d95	0.0	0.0	0.0	0.0	582.0	0.0	0.0	0.0	0.0	0.0	0.0	0.0	0.0	0.0
3004b5b1b795ff372412e90d6b1295a7	0.0	266.0	102.0	110.0	0.0	24.0	24.0	0.0	32.0	16.0	0.0	0.0	7.0	0.0
1edf5cee5aa0c3e759f03fcc77271155	79.0	26.0	0.0	0.0	0.0	50.0	73.0	87.0	24.0	12.0	140.0	53.0	36.0	0.0
d51ab712dd66c71a0e5570a034b61dea	0.0	47.0	25.0	21.0	0.0	0.0	31.0	63.0	156.0	222.0	8.0	0.0	0.0	0.0
9f6e210f6ea7ccc38fb144d2b0698a8d	62.0	33.0	19.0	24.0	0.0	37.0	0.0	0.0	0.0	0.0	281.0	14.0	102.0	0.0
5ad0530de437d66995ad035ce72ceeb0	0.0	246.0	166.0	157.0	0.0	0.0	0.0	0.0	0.0	0.0	0.0	0.0	0.0	0.0
6bd4d5b61cc05486913af0cc23381e54	15.0	92.0	51.0	59.0	0.0	111.0	57.0	58.0	0.0	0.0	36.0	51.0	37.0	0.0
67e25ce18a309457db1ac4e730de7bf8	0.0	34.0	0.0	12.0	521.0	0.0	0.0	0.0	0.0	0.0	0.0	0.0	0.0	0.0
7cab98bbf9568338722f9e5a53737169	0.0	0.0	0.0	0.0	0.0	0.0	216.0	347.0	0.0	0.0	0.0	0.0	0.0	0.0
f5e83ee563824551767adec435300d1f	0.0	0.0	0.0	0.0	0.0	0.0	0.0	0.0	473.0	89.0	0.0	0.0	0.0	0.0
e6d2abb15c6e15681bc4c11068d7808a	0.0	266.0	105.0	123.0	0.0	11.0	9.0	10.0	36.0	0.0	0.0	0.0	0.0	0.0
607e292fa24dbfaf2cc3a23b6d7b1b4e	73.0	7.0	9.0	5.0	0.0	7.0	0.0	0.0	0.0	0.0	188.0	129.0	139.0	0.0
962149fa071b9d07582495ab76c42154	0.0	0.0	0.0	0.0	0.0	0.0	0.0	0.0	554.0	0.0	0.0	0.0	0.0	0.0
a0c91714eb1a5d265a8f05101d8020a5	0.0	259.0	109.0	131.0	0.0	0.0	0.0	0.0	53.0	0.0	0.0	0.0	0.0	0.0
7661ccccb867f328950058a8c099463e	0.0	0.0	0.0	0.0	0.0	0.0	238.0	313.0	0.0	0.0	0.0	0.0	0.0	0.0
5bf1031d39b4a422151f681aa873fd86	0.0	257.0	131.0	154.0	0.0	0.0	0.0	0.0	0.0	0.0	0.0	0.0	8.0	0.0
97f11250c8f8468350d64d2e1fcc05ff	0.0	0.0	0.0	0.0	0.0	0.0	0.0	0.0	550.0	0.0	0.0	0.0	0.0	0.0
31fb49d7319338818e5c561cc3e8f134	147.0	72.0	0.0	34.0	0.0	0.0	0.0	0.0	0.0	0.0	136.0	71.0	83.0	0.0
5546125333287c44ae1727f3d5b96eb6	0.0	0.0	0.0	0.0	0.0	541.0	0.0	0.0	0.0	0.0	0.0	0.0	0.0	0.0
1bd9ea3619c2c802312dae4d6701513f	35.0	0.0	0.0	0.0	0.0	21.0	10.0	18.0	58.0	26.0	303.0	39.0	30.0	0.0
f9c1c7de158ab4d555ec46bec26478f1	0.0	0.0	0.0	0.0	0.0	0.0	106.0	0.0	342.0	87.0	0.0	0.0	0.0	0.0
01c071fe83cce6cf3f04cb51a16f6cf9	49.0	12.0	0.0	0.0	0.0	0.0	0.0	0.0	0.0	0.0	88.0	184.0	201.0	0.0
70958f929499a0204b0f4f6051dd5072	25.0	181.0	87.0	106.0	0.0	0.0	0.0	0.0	0.0	0.0	31.0	50.0	54.0	0.0
6dcaed843ae909db228fd7825d3a8864	0.0	211.0	167.0	151.0	0.0	0.0	0.0	0.0	0.0	0.0	0.0	0.0	5.0	0.0
2aee17e668dd944e7792d625ec479fcf	0.0	167.0	74.0	107.0	0.0	0.0	73.0	79.0	0.0	0.0	0.0	21.0	13.0	0.0
63afe8e6aac58bf0d670a82ca5bc574c	0.0	0.0	0.0	0.0	0.0	42.0	9.0	0.0	22.0	0.0	77.0	243.0	141.0	0.0
6b9e593a501170ae935ff05e92512021	54.0	73.0	48.0	34.0	0.0	0.0	0.0	30.0	36.0	17.0	149.0	26.0	64.0	0.0
d5df79e90f8f402a66e74da0a6c47a11	54.0	129.0	59.0	77.0	0.0	208.0	0.0	0.0	0.0	0.0	0.0	0.0	0.0	0.0
f9806851ff6c92491e477eaefc0f9a38	0.0	157.0	123.0	124.0	0.0	0.0	19.0	84.0	0.0	20.0	0.0	0.0	0.0	0.0
04bfa26b3209850428c4ae09b1d4f4b8	0.0	92.0	76.0	60.0	0.0	0.0	105.0	88.0	0.0	0.0	64.0	15.0	25.0	0.0
ed796c2d7980f60f0d56d04fb6083cc3	0.0	0.0	0.0	0.0	0.0	399.0	0.0	34.0	81.0	11.0	0.0	0.0	0.0	0.0
63eb15027711090a0a263be7532edebd	0.0	0.0	0.0	0.0	0.0	0.0	0.0	0.0	492.0	31.0	0.0	0.0	0.0	0.0
e7ad1e3a46810d8669c95fef31579271	0.0	12.0	12.0	16.0	0.0	41.0	61.0	66.0	185.0	129.0	0.0	0.0	0.0	0.0
98af7ce2441e1836a5fc973fd831b5f6	27.0	140.0	87.0	88.0	0.0	0.0	90.0	88.0	0.0	0.0	0.0	0.0	0.0	0.0
593bde65164a2609a7ff0133cd975900	0.0	96.0	0.0	0.0	0.0	0.0	0.0	0.0	209.0	215.0	0.0	0.0	0.0	0.0
aad1265ce3697aba33e05e954262a240	0.0	131.0	110.0	158.0	0.0	24.0	0.0	22.0	74.0	0.0	0.0	0.0	0.0	0.0
d0d7d96f0a1bfcb444ca981d70b68dd9	0.0	0.0	0.0	0.0	0.0	0.0	0.0	0.0	0.0	0.0	183.0	141.0	194.0	0.0
eb89407ff0b336f24ed047144563dd50	0.0	83.0	0.0	0.0	0.0	0.0	217.0	214.0	0.0	0.0	0.0	0.0	0.0	0.0
710ce684c65361504403d8cd2d841fa8	0.0	0.0	0.0	0.0	0.0	0.0	0.0	0.0	514.0	0.0	0.0	0.0	0.0	0.0
8693216da01a75f2a374a093665476ec	0.0	175.0	80.0	164.0	0.0	0.0	0.0	0.0	0.0	0.0	46.0	45.0	0.0	0.0
fb9358e4192b4e3fb1a6210327ee6ff2	0.0	0.0	0.0	0.0	0.0	102.0	0.0	0.0	408.0	0.0	0.0	0.0	0.0	0.0
0b95de0e43a3e4c87341ce6625c37107	0.0	0.0	0.0	0.0	506.0	0.0	0.0	0.0	0.0	0.0	0.0	0.0	0.0	0.0
36ce1c251a308c0f7a6be03f20ecf070	0.0	0.0	0.0	0.0	0.0	134.0	121.0	119.0	0.0	131.0	0.0	0.0	0.0	0.0
72c63bca07d9dfb5f8d1afa93e78da18	0.0	141.0	78.0	96.0	0.0	0.0	122.0	65.0	0.0	0.0	0.0	0.0	0.0	0.0
687e1d94d2bfc46843a21e7706df067e	0.0	21.0	13.0	12.0	0.0	50.0	19.0	28.0	150.0	208.0	0.0	0.0	0.0	0.0
4ad8b6d4eedc32b7b87887de737c75e7	0.0	0.0	0.0	0.0	0.0	0.0	0.0	0.0	501.0	0.0	0.0	0.0	0.0	0.0
0b1de418940c4cbe3debb10167758e8f	173.0	34.0	24.0	23.0	0.0	11.0	0.0	0.0	0.0	0.0	152.0	0.0	83.0	0.0
af30685ec187ce235db722de69a498a6	0.0	92.0	96.0	77.0	0.0	0.0	124.0	110.0	0.0	0.0	0.0	0.0	0.0	0.0
57a028186bafb0607e11c25759123652	0.0	0.0	0.0	0.0	0.0	120.0	26.0	54.0	140.0	107.0	52.0	0.0	0.0	0.0
79c9235ff041fe76f6dc89a18c5a222a	0.0	0.0	18.0	0.0	0.0	96.0	0.0	0.0	384.0	0.0	0.0	0.0	0.0	0.0
81d3646d7769dcb18f836cb2e849f76e	0.0	179.0	122.0	121.0	0.0	29.0	0.0	0.0	0.0	0.0	20.0	13.0	12.0	0.0
836a3884be034c3109f25ca107f5fd0f	0.0	30.0	0.0	0.0	0.0	0.0	0.0	0.0	451.0	12.0	0.0	0.0	0.0	0.0
f8aeec3c1ff0f4e7e1c829e4db0618d9	0.0	0.0	0.0	0.0	492.0	0.0	0.0	0.0	0.0	0.0	0.0	0.0	0.0	0.0
4a2b40b6fd08afc1486f306ec8083f2a	30.0	122.0	75.0	64.0	0.0	42.0	0.0	0.0	0.0	0.0	23.0	18.0	116.0	0.0
803e9dc8e8c4c4fd8c7e399c8eb89a5c	0.0	179.0	112.0	117.0	0.0	11.0	7.0	0.0	0.0	0.0	19.0	28.0	16.0	0.0
6107feed8d202981b5e39e244bb4b3cc	0.0	0.0	0.0	0.0	0.0	9.0	0.0	11.0	404.0	65.0	0.0	0.0	0.0	0.0
09de3dde6c465b74bcb8e6f8a478e4e0	0.0	173.0	157.0	149.0	0.0	0.0	0.0	0.0	0.0	0.0	9.0	0.0	0.0	0.0
7eb1e4ce120d3349868baed5b44dab1a	0.0	0.0	0.0	0.0	0.0	0.0	0.0	0.0	468.0	17.0	0.0	0.0	0.0	0.0
ab490fa500fee3d905e96b58698a458d	0.0	0.0	0.0	0.0	0.0	0.0	0.0	69.0	373.0	42.0	0.0	0.0	0.0	0.0
9860b6ac5a594b06bf4a81c4fbd0b444	0.0	0.0	0.0	0.0	0.0	0.0	0.0	0.0	0.0	0.0	149.0	148.0	187.0	0.0
8a319f2031debadb73f2bd35fb2dc81e	0.0	0.0	0.0	0.0	0.0	33.0	257.0	41.0	86.0	66.0	0.0	0.0	0.0	0.0
d3c5b787f0ca71a9b39ff87ee8733a30	0.0	0.0	0.0	0.0	0.0	0.0	0.0	0.0	483.0	0.0	0.0	0.0	0.0	0.0
465507064110c3c6effce50e45589224	0.0	138.0	121.0	135.0	0.0	22.0	0.0	0.0	0.0	0.0	29.0	22.0	15.0	0.0
9663d0de58de2e4a43a4ca065517dc5a	0.0	0.0	0.0	0.0	0.0	0.0	0.0	0.0	482.0	0.0	0.0	0.0	0.0	0.0
f68086e9e9292831ce6ee3f2203e6941	102.0	0.0	0.0	0.0	0.0	12.0	184.0	28.0	5.0	18.0	120.0	0.0	11.0	0.0
1c3bae25df9dffaf2d84ed4c96d7c732	0.0	222.0	118.0	115.0	0.0	0.0	13.0	8.0	0.0	0.0	0.0	0.0	0.0	0.0
c4b94e3febac5895c6cdede30ba1a333	0.0	206.0	112.0	123.0	0.0	11.0	0.0	10.0	0.0	0.0	0.0	10.0	4.0	0.0
0b867bdc982ffa6946c7317e1535f5d8	0.0	0.0	0.0	0.0	0.0	17.0	29.0	59.0	119.0	252.0	0.0	0.0	0.0	0.0
cfe9468afec04aa6a53affeb5965852c	0.0	214.0	116.0	123.0	0.0	0.0	0.0	0.0	0.0	8.0	0.0	13.0	0.0	0.0
987027dc44208ccada49fa8ca6ab884a	0.0	209.0	93.0	133.0	0.0	0.0	0.0	5.0	34.0	0.0	0.0	0.0	0.0	0.0
82898097131cfe8495c02958a0ecf808	0.0	0.0	0.0	0.0	473.0	0.0	0.0	0.0	0.0	0.0	0.0	0.0	0.0	0.0
5958fd2b7ec972907e061e8f4d0c49b8	0.0	206.0	90.0	102.0	0.0	0.0	0.0	0.0	71.0	0.0	0.0	0.0	0.0	0.0
c8487b182705eaad35c8578b81969d20	0.0	215.0	134.0	100.0	0.0	19.0	0.0	0.0	0.0	0.0	0.0	0.0	0.0	0.0
c2d7bdee98e583cd4c751ab1c5b79a42	0.0	0.0	0.0	0.0	0.0	63.0	65.0	99.0	125.0	116.0	0.0	0.0	0.0	0.0
6443898054518f4a3520abd88ae8a640	45.0	69.0	31.0	59.0	0.0	0.0	0.0	0.0	0.0	0.0	100.0	115.0	48.0	0.0
72cfb5d7d1b5ad5021e66ce783b47570	0.0	0.0	0.0	0.0	0.0	0.0	0.0	14.0	88.0	361.0	0.0	0.0	0.0	0.0
1b616fbb0f3fed9781ee8b4ca66e6b2e	0.0	165.0	133.0	132.0	0.0	0.0	19.0	12.0	0.0	0.0	0.0	0.0	0.0	0.0
5395cf9d11c88c5a47b933b199fb99bb	0.0	0.0	0.0	0.0	0.0	35.0	0.0	0.0	426.0	0.0	0.0	0.0	0.0	0.0
a2055b3390cdb59e8f4cdb9701fca01b	0.0	0.0	0.0	0.0	0.0	0.0	0.0	15.0	156.0	289.0	0.0	0.0	0.0	0.0
216dcb08cda10e8b3b1349aef3c76620	0.0	159.0	100.0	108.0	0.0	0.0	0.0	0.0	0.0	0.0	40.0	33.0	19.0	0.0
a88f20e5316581a013745e290c1b0fe3	0.0	0.0	0.0	0.0	0.0	0.0	0.0	0.0	457.0	0.0	0.0	0.0	0.0	0.0
77496d8edbb6b7575c1b80604525d2f2	0.0	0.0	0.0	0.0	0.0	0.0	0.0	0.0	457.0	0.0	0.0	0.0	0.0	0.0
7637218982e4f4ffcd749c743f7a0fbc	0.0	82.0	0.0	0.0	0.0	0.0	105.0	234.0	0.0	33.0	0.0	0.0	0.0	0.0
e75b64d9a241f71d7874c5b4e6007719	0.0	0.0	0.0	0.0	0.0	0.0	0.0	0.0	454.0	0.0	0.0	0.0	0.0	0.0
26dbef51cdba97c1f8b84a235ea06f3c	0.0	92.0	47.0	72.0	0.0	0.0	19.0	46.0	108.0	68.0	0.0	0.0	0.0	0.0
80047f897e7e3514c11be04138f27b8f	0.0	185.0	115.0	141.0	0.0	0.0	0.0	0.0	0.0	0.0	0.0	5.0	4.0	0.0
db32dd77878a4d7c2b52a2ea4a1941f8	0.0	188.0	130.0	131.0	0.0	0.0	0.0	0.0	0.0	0.0	0.0	0.0	0.0	0.0
34b93394ad2057aa52c4ca717f1bf4a1	0.0	242.0	87.0	92.0	0.0	0.0	0.0	0.0	26.0	0.0	0.0	0.0	0.0	0.0
d039c7965ba3b0c0d787496636a9f468	0.0	196.0	72.0	73.0	0.0	0.0	8.0	11.0	87.0	0.0	0.0	0.0	0.0	0.0
e94f54359c805136a42c50ed84bcba23	0.0	154.0	137.0	155.0	0.0	0.0	0.0	0.0	0.0	0.0	0.0	0.0	0.0	0.0
8f23fdcf6f94f67605d968b6e4a61a01	0.0	0.0	0.0	0.0	0.0	21.0	0.0	96.0	224.0	103.0	0.0	0.0	0.0	0.0
b912f358c8bc46e3ec07af22b44a1aa4	0.0	0.0	0.0	0.0	0.0	0.0	0.0	0.0	0.0	0.0	71.0	151.0	222.0	0.0
d8d7cf4435278fa08ae44159e7f1e544	9.0	0.0	0.0	0.0	0.0	0.0	0.0	0.0	0.0	0.0	36.0	225.0	173.0	0.0
58fb1313483b75a94469368eafbc28f8	0.0	224.0	97.0	92.0	0.0	0.0	0.0	0.0	30.0	0.0	0.0	0.0	0.0	0.0
0bcc144085d17cb32ece4848809d7fb1	0.0	187.0	93.0	163.0	0.0	0.0	0.0	0.0	0.0	0.0	0.0	0.0	0.0	0.0
8f5c445dc468dce73bc506e65c82cdf7	0.0	39.0	39.0	48.0	0.0	30.0	49.0	132.0	48.0	57.0	0.0	0.0	0.0	0.0
07018685767d59b63be478c31e512db2	0.0	231.0	87.0	111.0	0.0	0.0	0.0	0.0	12.0	0.0	0.0	0.0	0.0	0.0
f36c50279a8fa1c121cb9dda1ab1cb42	0.0	166.0	96.0	78.0	0.0	0.0	46.0	55.0	0.0	0.0	0.0	0.0	0.0	0.0
723d06bab6225f80c683c38c5610799b	0.0	126.0	101.0	136.0	0.0	11.0	0.0	0.0	0.0	0.0	22.0	19.0	25.0	0.0
13df026429287ac25e3892dd1c4483b3	0.0	175.0	109.0	140.0	0.0	0.0	0.0	0.0	0.0	0.0	0.0	6.0	9.0	0.0
857c31050a6706553523ba04ae510fde	0.0	154.0	87.0	101.0	0.0	3.0	0.0	0.0	0.0	0.0	13.0	36.0	42.0	0.0
c3dc89741dfcf91fff80a6b385f9a10e	0.0	12.0	0.0	8.0	0.0	60.0	0.0	0.0	334.0	22.0	0.0	0.0	0.0	0.0
8612a638846acf832935cb932a1f0398	0.0	0.0	0.0	0.0	435.0	0.0	0.0	0.0	0.0	0.0	0.0	0.0	0.0	0.0
449491972236441cb634b0303c6b74a0	0.0	0.0	0.0	0.0	0.0	14.0	0.0	43.0	374.0	0.0	0.0	0.0	0.0	0.0
65e5d5b5c6c7001ef5c3b8f58ce2047b	0.0	91.0	73.0	82.0	0.0	0.0	94.0	88.0	0.0	0.0	0.0	0.0	0.0	0.0
4e2d0baae4086a5f74e74e70bb12bf03	0.0	0.0	0.0	0.0	0.0	0.0	0.0	0.0	428.0	0.0	0.0	0.0	0.0	0.0
3acc95393d89441707460df278134bd5	0.0	220.0	111.0	96.0	0.0	0.0	0.0	0.0	0.0	0.0	0.0	0.0	0.0	0.0
308bd483d130fe0ef774c3838b8fe46a	0.0	180.0	108.0	116.0	0.0	0.0	0.0	0.0	0.0	0.0	0.0	0.0	23.0	0.0
c6010dd96bfef3e20e29984215a5508f	0.0	51.0	39.0	42.0	0.0	0.0	0.0	20.0	136.0	137.0	0.0	0.0	0.0	0.0
f025e1b7e9951d68b76e3d575a3be226	0.0	177.0	104.0	129.0	0.0	0.0	0.0	0.0	0.0	0.0	0.0	0.0	14.0	0.0
d375f4663bd181ca833f256d6abae8f6	361.0	0.0	0.0	0.0	0.0	0.0	0.0	0.0	0.0	0.0	62.0	0.0	0.0	0.0
eda2b8bb3725cfac8bb7a085428ae7b4	0.0	59.0	45.0	53.0	0.0	18.0	138.0	91.0	0.0	0.0	13.0	0.0	6.0	0.0
71095e2bbc44786d745a841fc64ef190	0.0	0.0	0.0	0.0	421.0	0.0	0.0	0.0	0.0	0.0	0.0	0.0	0.0	0.0
c45a73594d5ea1eeeee56c28b31ceb63	0.0	0.0	0.0	0.0	0.0	0.0	0.0	0.0	420.0	0.0	0.0	0.0	0.0	0.0
47c761ef12da459ce4a632c552e1a5c3	24.0	38.0	40.0	52.0	0.0	43.0	37.0	31.0	0.0	0.0	67.0	24.0	63.0	0.0
9ac3bb1d7dedb08a012692a6f536b5af	0.0	174.0	78.0	98.0	0.0	0.0	0.0	0.0	29.0	0.0	24.0	0.0	16.0	0.0
59122b542440ef71e3074678098192d1	21.0	166.0	43.0	48.0	0.0	37.0	31.0	32.0	0.0	0.0	20.0	8.0	12.0	0.0
0527eb4b511f4ad7ed923ef86068c981	0.0	174.0	120.0	124.0	0.0	0.0	0.0	0.0	0.0	0.0	0.0	0.0	0.0	0.0
d350ed02e3e8ac5ff62590f2f6fa3906	0.0	150.0	119.0	147.0	0.0	0.0	0.0	0.0	0.0	0.0	0.0	0.0	2.0	0.0
233f4984b368c629dce62662fbf10513	0.0	50.0	29.0	0.0	0.0	0.0	0.0	0.0	0.0	0.0	64.0	127.0	144.0	0.0
49b1e29a932665ef776025099e70c23e	111.0	0.0	0.0	0.0	0.0	14.0	0.0	0.0	0.0	0.0	96.0	28.0	163.0	0.0
3509d7fff229ce1ed02e36c4ce288fe8	0.0	77.0	34.0	40.0	0.0	38.0	14.0	13.0	38.0	106.0	17.0	18.0	17.0	0.0
5c6f10d1eeb49f3720372509d7542313	0.0	199.0	98.0	114.0	0.0	0.0	0.0	0.0	0.0	0.0	0.0	0.0	0.0	0.0
d813664e2a131ccc9f5ea2c5ae96c139	0.0	0.0	0.0	0.0	0.0	0.0	0.0	0.0	0.0	0.0	83.0	0.0	327.0	0.0
7dbf8044196ea8cc894577991fee5afb	0.0	191.0	74.0	69.0	0.0	0.0	0.0	0.0	68.0	6.0	0.0	0.0	0.0	0.0
21b6def07419f4dddd70dadd154b5a3a	0.0	49.0	51.0	34.0	0.0	0.0	0.0	0.0	229.0	45.0	0.0	0.0	0.0	0.0
c28ae5263c92190509c617f64332269c	13.0	117.0	99.0	96.0	0.0	0.0	22.0	23.0	0.0	0.0	22.0	7.0	7.0	0.0
f34ad18a6fc24f4f3ab71cdf6680dc09	0.0	0.0	0.0	0.0	0.0	0.0	0.0	0.0	405.0	0.0	0.0	0.0	0.0	0.0
07b272bad289b3175196afb876ba70e7	0.0	0.0	0.0	0.0	0.0	0.0	0.0	0.0	297.0	108.0	0.0	0.0	0.0	0.0
76953c5e4dc735db92129b596f2160e9	0.0	200.0	80.0	123.0	0.0	0.0	0.0	0.0	0.0	0.0	0.0	0.0	0.0	0.0
da9a696622460e4818764ff29ce9c87c	100.0	0.0	0.0	0.0	0.0	0.0	0.0	0.0	0.0	0.0	67.0	103.0	131.0	0.0
8486668584650c491a5e6ffb7ada8c4f	0.0	15.0	0.0	0.0	0.0	0.0	0.0	15.0	371.0	0.0	0.0	0.0	0.0	0.0
60f6746a820cc1155b3b222db1bbd247	0.0	176.0	111.0	113.0	0.0	0.0	0.0	0.0	0.0	0.0	0.0	0.0	0.0	0.0
e215e862bc4bc45d1db165e07ba72a81	0.0	0.0	0.0	0.0	0.0	352.0	0.0	8.0	26.0	14.0	0.0	0.0	0.0	0.0
05b18ec772b1068d4e5af85a64eaed0f	0.0	0.0	0.0	0.0	399.0	0.0	0.0	0.0	0.0	0.0	0.0	0.0	0.0	0.0
f10f9afa09df303dbb43cc1d1dae205e	36.0	35.0	24.0	22.0	0.0	10.0	0.0	0.0	0.0	0.0	81.0	102.0	88.0	0.0
650f09b32e9acb89e816a96dc7d76e43	0.0	0.0	0.0	0.0	0.0	0.0	0.0	0.0	223.0	175.0	0.0	0.0	0.0	0.0
3cdd6aee5bd569a7d3cbdfe1307bd666	0.0	200.0	89.0	108.0	0.0	0.0	0.0	0.0	0.0	0.0	0.0	0.0	0.0	0.0
0814abf2c6d50d8eeea04ae5872d00d2	0.0	164.0	114.0	117.0	0.0	0.0	0.0	0.0	0.0	0.0	0.0	0.0	0.0	0.0
09aabdf92e4b2fbc188048a4fc58c4f0	0.0	0.0	0.0	0.0	395.0	0.0	0.0	0.0	0.0	0.0	0.0	0.0	0.0	0.0
75dd2f40598063c73360638a0493c913	0.0	182.0	97.0	114.0	0.0	0.0	0.0	0.0	0.0	0.0	0.0	0.0	0.0	0.0
9373b7e134e498fc1eb3041203f51dfa	0.0	165.0	116.0	109.0	0.0	0.0	0.0	0.0	0.0	0.0	0.0	0.0	0.0	0.0
3b6fd7be1d9b5827f77b4942a55be2e3	0.0	0.0	0.0	0.0	0.0	63.0	0.0	13.0	241.0	73.0	0.0	0.0	0.0	0.0
1727bd8544639e521c5efff9f8c225a6	0.0	0.0	0.0	0.0	373.0	0.0	0.0	0.0	0.0	0.0	0.0	0.0	0.0	14.0
ca1cc06fc59a7f6e68b18299f108897e	0.0	164.0	108.0	114.0	0.0	0.0	0.0	0.0	0.0	0.0	0.0	0.0	0.0	0.0
1cb3558d8e931cbfe4138dc6111e0892	0.0	114.0	123.0	114.0	30.0	0.0	0.0	0.0	0.0	0.0	0.0	0.0	5.0	0.0
ae67bceddae447e7dade752a5a28d6f3	0.0	0.0	0.0	0.0	0.0	0.0	0.0	69.0	96.0	219.0	0.0	0.0	0.0	0.0
282d970c7e74112691085e63921dbcfd	49.0	0.0	0.0	0.0	0.0	283.0	0.0	0.0	0.0	0.0	0.0	51.0	0.0	0.0
5253d98d25bc51baaf939f468ca8ef59	0.0	176.0	112.0	83.0	0.0	0.0	0.0	0.0	0.0	0.0	12.0	0.0	0.0	0.0
7957945c5dd5768b643dc5b17194dc91	0.0	60.0	0.0	0.0	0.0	62.0	0.0	74.0	76.0	91.0	20.0	0.0	0.0	0.0
abb3d31ed1c1f986ddb94d51af8e67ef	0.0	0.0	0.0	0.0	0.0	0.0	0.0	90.0	127.0	165.0	0.0	0.0	0.0	0.0
cdcc3afd3d944a689480601359e3c039	0.0	0.0	0.0	0.0	0.0	0.0	0.0	0.0	380.0	0.0	0.0	0.0	0.0	0.0
c86c982e36ad59e0888e175fdf963e8c	0.0	189.0	83.0	107.0	0.0	0.0	0.0	0.0	0.0	0.0	0.0	0.0	0.0	0.0
cbde5fe4b37d4fa108f6e609ad159a6e	50.0	32.0	0.0	0.0	0.0	64.0	71.0	0.0	0.0	0.0	93.0	20.0	48.0	0.0
c4e16e2ca85ff9eb360fd895f75227ca	0.0	0.0	0.0	0.0	0.0	0.0	0.0	0.0	284.0	92.0	0.0	0.0	0.0	0.0
13c58fc74653f2e7e76a6cbc7de4b77f	0.0	198.0	79.0	98.0	0.0	0.0	0.0	0.0	0.0	0.0	0.0	0.0	0.0	0.0
a5c95d5f2fc8a4037c6c735708c253bd	0.0	171.0	70.0	101.0	0.0	0.0	5.0	0.0	28.0	0.0	0.0	0.0	0.0	0.0
74d9e554e4535a1e96c2b94b843d05a8	0.0	0.0	0.0	0.0	0.0	0.0	0.0	70.0	70.0	235.0	0.0	0.0	0.0	0.0
67a9f679e9205f94c0c3b17c512e5cc1	62.0	0.0	0.0	0.0	0.0	23.0	47.0	0.0	44.0	0.0	196.0	0.0	0.0	0.0
9e3e6a1c58d9855cfe90dccf262ac1df	0.0	94.0	36.0	50.0	0.0	0.0	50.0	62.0	45.0	33.0	0.0	0.0	0.0	0.0
79cb0502666fb336451226c33970ec67	0.0	0.0	0.0	0.0	0.0	0.0	0.0	0.0	366.0	0.0	0.0	0.0	0.0	0.0
96cc3f44dde7538806818159372afdf5	0.0	155.0	111.0	99.0	0.0	0.0	0.0	0.0	0.0	0.0	0.0	0.0	0.0	0.0
382df3e0baaef58683f1815a6dd0082f	0.0	19.0	0.0	0.0	0.0	29.0	0.0	0.0	310.0	0.0	0.0	0.0	7.0	0.0
bf8ce7fa47bc4d1c476efc8a0290ee9b	0.0	0.0	0.0	0.0	365.0	0.0	0.0	0.0	0.0	0.0	0.0	0.0	0.0	0.0
b09354fcb7e062e6a690bdaf8360306f	0.0	0.0	0.0	0.0	365.0	0.0	0.0	0.0	0.0	0.0	0.0	0.0	0.0	0.0
edab60a0874cc7cdbd6b175d7c0e57da	0.0	0.0	0.0	0.0	0.0	0.0	0.0	0.0	365.0	0.0	0.0	0.0	0.0	0.0
ad8664f21c744d16b06f829014b5511c	100.0	0.0	0.0	71.0	0.0	0.0	0.0	0.0	0.0	0.0	89.0	104.0	0.0	0.0
70b7e370ff035670872a65fb072d6cb2	0.0	120.0	55.0	51.0	0.0	0.0	0.0	0.0	102.0	36.0	0.0	0.0	0.0	0.0
c56d12a1a6c69c8fd5e83bc51aa7b741	0.0	145.0	96.0	95.0	0.0	0.0	0.0	0.0	0.0	0.0	0.0	0.0	26.0	0.0
02502365f831e3f6a47f1bb38b6a7dce	0.0	89.0	40.0	61.0	0.0	0.0	95.0	77.0	0.0	0.0	0.0	0.0	0.0	0.0
940f895b77a891622360a59a2bc48a9a	47.0	50.0	38.0	36.0	0.0	0.0	0.0	0.0	0.0	0.0	67.0	70.0	53.0	0.0
7ae58cef0c604ff91fb871b3ad579da0	0.0	123.0	64.0	60.0	0.0	0.0	61.0	53.0	0.0	0.0	0.0	0.0	0.0	0.0
8219cb35411cc09621c59ce542f56618	11.0	25.0	23.0	22.0	0.0	19.0	0.0	8.0	0.0	12.0	53.0	146.0	41.0	0.0
f9117bde133ad80998f6d4424a51f659	0.0	0.0	0.0	0.0	0.0	0.0	0.0	35.0	75.0	250.0	0.0	0.0	0.0	0.0
cf3381318906e1e08f58bca905636dc0	0.0	0.0	0.0	0.0	359.0	0.0	0.0	0.0	0.0	0.0	0.0	0.0	0.0	0.0
de9ecb6e0b12682e550a5a26d10a1c34	0.0	0.0	0.0	0.0	0.0	0.0	0.0	0.0	325.0	34.0	0.0	0.0	0.0	0.0
9cfbccc48b63a139f7c2f3aa3cd75667	0.0	195.0	98.0	65.0	0.0	0.0	0.0	0.0	0.0	0.0	0.0	0.0	0.0	0.0
69f3971f2ea9b2410b6a782509755591	0.0	180.0	74.0	104.0	0.0	0.0	0.0	0.0	0.0	0.0	0.0	0.0	0.0	0.0
4bfc8d33ec5b05c7f11f6b8968679c7a	0.0	99.0	108.0	74.0	0.0	11.0	41.0	25.0	0.0	0.0	0.0	0.0	0.0	0.0
b42b86c7b8ea96e0b8b3a46d2a795433	0.0	0.0	0.0	0.0	0.0	0.0	0.0	0.0	358.0	0.0	0.0	0.0	0.0	0.0
345c308f76539edd9e91d297e2d97c13	0.0	0.0	36.0	0.0	0.0	0.0	96.0	0.0	225.0	0.0	0.0	0.0	0.0	0.0
a5a863de56cfdae30ea31ce2e5bbab46	0.0	0.0	0.0	0.0	357.0	0.0	0.0	0.0	0.0	0.0	0.0	0.0	0.0	0.0
d6efd2da2728fd74ded268122ee05036	0.0	0.0	0.0	0.0	356.0	0.0	0.0	0.0	0.0	0.0	0.0	0.0	0.0	0.0
a9cdace376f468b22ea7bac7de7e029c	4.0	184.0	0.0	0.0	0.0	0.0	0.0	0.0	166.0	0.0	0.0	0.0	0.0	0.0
31f20c3931224b09384294ad9a2bd3b3	0.0	159.0	79.0	114.0	0.0	0.0	0.0	0.0	0.0	0.0	0.0	0.0	0.0	0.0
325ca3f3ba51640e49bf61e7fc6a24f4	0.0	0.0	76.0	0.0	0.0	66.0	0.0	127.0	83.0	0.0	0.0	0.0	0.0	0.0
88f5f318c8c42662f58fbe678485cd75	0.0	128.0	84.0	88.0	0.0	0.0	50.0	0.0	0.0	0.0	0.0	0.0	0.0	0.0
c454a1f3380b1ddd6d5497ea28a26b0b	0.0	118.0	0.0	0.0	0.0	94.0	0.0	0.0	0.0	0.0	62.0	0.0	75.0	0.0
ae813b782cc38d6d1866bf9a15c0355f	0.0	35.0	30.0	34.0	0.0	21.0	53.0	92.0	33.0	30.0	15.0	4.0	0.0	0.0
83eced49693cd485eea432d2f3a8b572	0.0	0.0	0.0	0.0	0.0	54.0	47.0	54.0	0.0	0.0	41.0	127.0	24.0	0.0
6497a6287c5db2488adee4ea8e39ab10	0.0	0.0	0.0	0.0	0.0	0.0	0.0	0.0	345.0	0.0	0.0	0.0	0.0	0.0
67015d16d2d2b9d49384ca6ef960dea1	137.0	0.0	0.0	0.0	0.0	0.0	0.0	0.0	0.0	0.0	98.0	40.0	69.0	0.0
55bfce25a2269818de17ac30199fc72a	0.0	116.0	125.0	103.0	0.0	0.0	0.0	0.0	0.0	0.0	0.0	0.0	0.0	0.0
1ab00f6d5c276854565f999600a5f108	0.0	0.0	0.0	0.0	0.0	0.0	0.0	344.0	0.0	0.0	0.0	0.0	0.0	0.0
64b4d0d88bb5c47e2f9c3ca4c04d03dc	24.0	83.0	73.0	90.0	0.0	12.0	0.0	0.0	0.0	0.0	29.0	31.0	0.0	0.0
7a10f4c4c85b1e821ae02f9273f98afd	0.0	0.0	7.0	0.0	0.0	19.0	0.0	0.0	315.0	0.0	0.0	0.0	0.0	0.0
ef51a1358e07f6a2e28b05a19cfbf8b2	0.0	0.0	0.0	0.0	0.0	0.0	0.0	0.0	222.0	118.0	0.0	0.0	0.0	0.0
c282af9d460ccf513c084fcf13656bf9	0.0	0.0	0.0	0.0	0.0	27.0	77.0	235.0	0.0	0.0	0.0	0.0	0.0	0.0
f883d7351501cf6935a4f9273c6d7f24	0.0	126.0	64.0	89.0	0.0	0.0	22.0	23.0	0.0	0.0	14.0	0.0	0.0	0.0
17f62a7d2532a6ae25abffb699db3cc4	0.0	135.0	101.0	80.0	0.0	0.0	0.0	20.0	0.0	0.0	0.0	0.0	0.0	0.0
17043869c4ff2e6f92adf95b4310c53c	0.0	138.0	56.0	85.0	0.0	0.0	0.0	0.0	50.0	0.0	0.0	0.0	6.0	0.0
8c57fa8754336850c1b38cbc182c4ffd	0.0	0.0	0.0	20.0	0.0	0.0	0.0	0.0	0.0	0.0	0.0	103.0	210.0	0.0
037a28cd59b092dbfef24cef2f396b0e	0.0	0.0	0.0	0.0	0.0	222.0	0.0	111.0	0.0	0.0	0.0	0.0	0.0	0.0
ddcc20fc60ff84b4e1b67934b3a00546	37.0	33.0	23.0	33.0	0.0	108.0	42.0	42.0	0.0	0.0	0.0	13.0	0.0	0.0
ff3e944de3075f244c9daf2a420e26d1	0.0	0.0	0.0	0.0	0.0	43.0	0.0	0.0	288.0	0.0	0.0	0.0	0.0	0.0
d19c6a81f5ab45c83b556c3d9d51da6d	0.0	0.0	0.0	0.0	330.0	0.0	0.0	0.0	0.0	0.0	0.0	0.0	0.0	0.0
22c1deea013eea2c8cd10547e7fd70ef	0.0	0.0	0.0	0.0	0.0	0.0	0.0	0.0	0.0	0.0	78.0	79.0	173.0	0.0
b07d70c74fd722dd06caec8bf7b26bff	13.0	133.0	82.0	82.0	0.0	0.0	0.0	0.0	0.0	0.0	0.0	18.0	0.0	0.0
b232ac13d7342a28beee14b435c98358	0.0	158.0	76.0	94.0	0.0	0.0	0.0	0.0	0.0	0.0	0.0	0.0	0.0	0.0
38dc6e6ae2d9af2eeb74e523f1bcd437	0.0	138.0	80.0	110.0	0.0	0.0	0.0	0.0	0.0	0.0	0.0	0.0	0.0	0.0
5b9106f4a290708b7321aa04a4e935af	0.0	0.0	0.0	0.0	0.0	0.0	0.0	0.0	328.0	0.0	0.0	0.0	0.0	0.0
8a6f5547b287222c15d9e9d8eca5ac1e	0.0	0.0	0.0	0.0	0.0	0.0	0.0	0.0	327.0	0.0	0.0	0.0	0.0	0.0
f6ad51de5a7c63bd889ebaebc7b84857	0.0	145.0	97.0	80.0	0.0	0.0	0.0	0.0	0.0	0.0	0.0	0.0	0.0	0.0
0e4324eee7005e82de8f34a668a35d53	0.0	137.0	99.0	86.0	0.0	0.0	0.0	0.0	0.0	0.0	0.0	0.0	0.0	0.0
2e193e82e7000acd47ce00bdd77ed4e0	11.0	23.0	0.0	10.0	0.0	44.0	0.0	31.0	112.0	61.0	22.0	0.0	6.0	0.0
0ea6bee08c087805c6ca5e638c12a71f	0.0	164.0	75.0	81.0	0.0	0.0	0.0	0.0	0.0	0.0	0.0	0.0	0.0	0.0
013d1fc9469940670d2e3b52068bbb6b	0.0	153.0	81.0	86.0	0.0	0.0	0.0	0.0	0.0	0.0	0.0	0.0	0.0	0.0
cd93017c92a76a9ce9abbee5f54f88bb	0.0	131.0	102.0	87.0	0.0	0.0	0.0	0.0	0.0	0.0	0.0	0.0	0.0	0.0
4ab35edd468094d16b50cd1556275c8d	0.0	149.0	76.0	93.0	0.0	0.0	0.0	0.0	0.0	0.0	0.0	0.0	0.0	0.0
d1e7069c930bb4790713681f06f84cf0	0.0	145.0	73.0	93.0	0.0	7.0	0.0	0.0	0.0	0.0	0.0	0.0	0.0	0.0
1446f495c3da2bfa613e77f7edf77f72	0.0	28.0	24.0	23.0	0.0	0.0	15.0	36.0	0.0	0.0	73.0	21.0	97.0	0.0
2412eebd6bfdfa9814e463b5c3043e8b	0.0	0.0	36.0	33.0	248.0	0.0	0.0	0.0	0.0	0.0	0.0	0.0	0.0	0.0
69523997146ff118c5658b480510e7b3	0.0	0.0	22.0	0.0	0.0	36.0	146.0	108.0	0.0	0.0	0.0	4.0	0.0	0.0
88775cd81f1570321d972c1c88061ff1	58.0	13.0	7.0	7.0	0.0	86.0	0.0	0.0	0.0	0.0	97.0	8.0	38.0	0.0
c6298915b36c9ac93677f11eea0764eb	0.0	125.0	108.0	81.0	0.0	0.0	0.0	0.0	0.0	0.0	0.0	0.0	0.0	0.0
56c2fedf17d023b0469224f4ffdd046f	0.0	116.0	0.0	0.0	0.0	9.0	125.0	50.0	0.0	13.0	0.0	0.0	0.0	0.0
f0dce73a394fa43b468405fad5c5e748	0.0	0.0	0.0	0.0	312.0	0.0	0.0	0.0	0.0	0.0	0.0	0.0	0.0	0.0
8a29946a1040a8af540f534c4644e6f5	0.0	0.0	0.0	0.0	0.0	0.0	0.0	0.0	145.0	167.0	0.0	0.0	0.0	0.0
1933ac7e5faf6244d1cfacf7e2f962b0	0.0	53.0	56.0	66.0	0.0	0.0	0.0	36.0	57.0	41.0	0.0	0.0	0.0	0.0
90722a58387204d92de2be9d7daab6a2	0.0	143.0	67.0	0.0	0.0	70.0	0.0	0.0	0.0	0.0	0.0	0.0	28.0	0.0
0512cccd93ceea4af339c6e6456465d2	0.0	108.0	82.0	68.0	0.0	0.0	15.0	14.0	15.0	6.0	0.0	0.0	0.0	0.0
bcabff9be0f297148813fb9dcd0c93ef	0.0	72.0	0.0	0.0	0.0	0.0	78.0	73.0	83.0	0.0	0.0	0.0	0.0	0.0
55b238b944275a16d41e7399b13dfa15	0.0	0.0	0.0	0.0	0.0	25.0	77.0	27.0	117.0	60.0	0.0	0.0	0.0	0.0
ec9562edcf3986f9a56ee377d8ff737c	0.0	0.0	0.0	0.0	0.0	84.0	74.0	46.0	20.0	0.0	31.0	0.0	50.0	0.0
f936ac6dc5b21068d7aea3a97ff775e8	0.0	173.0	70.0	60.0	0.0	0.0	0.0	0.0	0.0	0.0	0.0	0.0	0.0	0.0
cc3cdd2ff9769ffe23e1c9cb097e0af8	0.0	141.0	82.0	80.0	0.0	0.0	0.0	0.0	0.0	0.0	0.0	0.0	0.0	0.0
74b662c142668b23b8fae60b716af76c	0.0	0.0	0.0	0.0	0.0	69.0	0.0	0.0	67.0	167.0	0.0	0.0	0.0	0.0
900afa963e27408f431a968c0a29c4ba	8.0	87.0	51.0	63.0	0.0	0.0	50.0	19.0	0.0	0.0	14.0	10.0	0.0	0.0
7e6dee0ebad6cb9bcdf484114033a30d	0.0	162.0	55.0	85.0	0.0	0.0	0.0	0.0	0.0	0.0	0.0	0.0	0.0	0.0
710b9870d9a9c16e9a8eb010ad4a7cbd	0.0	116.0	72.0	114.0	0.0	0.0	0.0	0.0	0.0	0.0	0.0	0.0	0.0	0.0
d4c8ec9d7d027a51faafcc9acd9edb69	0.0	86.0	51.0	56.0	0.0	0.0	49.0	60.0	0.0	0.0	0.0	0.0	0.0	0.0
c9b6f06a64809b4085cf1c5c680fc62b	0.0	0.0	0.0	0.0	0.0	0.0	0.0	0.0	302.0	0.0	0.0	0.0	0.0	0.0
f6edbcb91f18c1dcc550ce2c68333165	59.0	0.0	0.0	0.0	0.0	25.0	118.0	43.0	0.0	8.0	21.0	27.0	0.0	0.0
bb426a91f236f89ee90b5b07a464e120	0.0	132.0	91.0	78.0	0.0	0.0	0.0	0.0	0.0	0.0	0.0	0.0	0.0	0.0
bcba47620c299fd34809f143e3d26dff	37.0	0.0	0.0	0.0	0.0	41.0	94.0	0.0	47.0	21.0	18.0	0.0	42.0	0.0
d376f78439bd2ec56f8e1f2f71147c13	0.0	170.0	52.0	78.0	0.0	0.0	0.0	0.0	0.0	0.0	0.0	0.0	0.0	0.0
577707b744c7ba478e046823f93146d5	0.0	126.0	71.0	74.0	0.0	0.0	29.0	0.0	0.0	0.0	0.0	0.0	0.0	0.0
23c1c4d01ab4fb1dddd34b83a4416376	0.0	125.0	53.0	53.0	0.0	0.0	40.0	29.0	0.0	0.0	0.0	0.0	0.0	0.0
700b589b56bfcb6392274cb26dd2166b	0.0	100.0	62.0	69.0	0.0	0.0	21.0	39.0	0.0	8.0	0.0	0.0	0.0	0.0
33d7317d54fe41bced73dd2f497c12ec	31.0	37.0	35.0	23.0	0.0	0.0	0.0	0.0	0.0	0.0	80.0	34.0	58.0	0.0
3ad1c8aad6bdd6f9f60902f08beaf0b1	5.0	126.0	68.0	64.0	0.0	15.0	0.0	9.0	0.0	0.0	0.0	0.0	11.0	0.0
1d1d68c0261030f6885f385754f10174	0.0	52.0	26.0	23.0	0.0	29.0	0.0	0.0	168.0	0.0	0.0	0.0	0.0	0.0
9a637c01babe1d28facfb62c374874bc	0.0	41.0	15.0	14.0	0.0	0.0	103.0	125.0	0.0	0.0	0.0	0.0	0.0	0.0
4c3c91a07e2685ea9eef6c712380549c	0.0	0.0	0.0	0.0	0.0	0.0	0.0	53.0	110.0	134.0	0.0	0.0	0.0	0.0
702af9e944edfd5a1a7f0dce0d566376	0.0	106.0	70.0	120.0	0.0	0.0	0.0	0.0	0.0	0.0	0.0	0.0	0.0	0.0
52c6965b0eda3f37cf7a46a78356edbe	0.0	113.0	62.0	90.0	0.0	0.0	0.0	0.0	0.0	0.0	0.0	0.0	30.0	0.0
f48c022844a775795128c58013301654	9.0	168.0	54.0	63.0	0.0	0.0	0.0	0.0	0.0	0.0	0.0	0.0	0.0	0.0
d91d91ddd239d382e64507aae73eba4b	0.0	116.0	100.0	78.0	0.0	0.0	0.0	0.0	0.0	0.0	0.0	0.0	0.0	0.0
e72f92e8de7165d23a81dbec02f9d423	22.0	0.0	0.0	0.0	0.0	6.0	0.0	0.0	9.0	125.0	89.0	0.0	42.0	0.0
39f58ec1f86a4ae433c06e4340c8fac5	0.0	46.0	35.0	37.0	0.0	0.0	22.0	58.0	53.0	40.0	0.0	0.0	0.0	0.0
dcc197c66e2fdaa809c1e04f7a79a2fe	0.0	0.0	0.0	0.0	0.0	0.0	0.0	0.0	258.0	33.0	0.0	0.0	0.0	0.0
a0b35aedeea2cace833506fabd52cf22	0.0	0.0	0.0	0.0	0.0	0.0	115.0	175.0	0.0	0.0	0.0	0.0	0.0	0.0
610eb56165a4d8090511c5088511b048	0.0	137.0	69.0	83.0	0.0	0.0	0.0	0.0	0.0	0.0	0.0	0.0	0.0	0.0
f8a49510b4163d28e29b74db43c539e6	0.0	0.0	0.0	0.0	0.0	0.0	0.0	0.0	0.0	0.0	142.0	147.0	0.0	0.0
09ae24f2154f672b30052e73e7e8d7c1	65.0	0.0	0.0	0.0	0.0	0.0	0.0	0.0	22.0	0.0	165.0	0.0	36.0	0.0
6c5f4144f390fce344fcab88a797638a	14.0	80.0	49.0	56.0	0.0	35.0	0.0	0.0	0.0	0.0	32.0	0.0	21.0	0.0
7c7460390452e22396912b94d42642e8	0.0	117.0	80.0	90.0	0.0	0.0	0.0	0.0	0.0	0.0	0.0	0.0	0.0	0.0
62b0b243d6b3b2b15948054bc600ff86	0.0	0.0	0.0	0.0	0.0	12.0	0.0	0.0	267.0	8.0	0.0	0.0	0.0	0.0
46ca097e633fe69ec90772cf148a72eb	41.0	0.0	0.0	14.0	0.0	16.0	0.0	0.0	0.0	0.0	68.0	88.0	59.0	0.0
10bb7eb297db0e9a203c4323762c87ed	0.0	114.0	66.0	50.0	0.0	0.0	0.0	0.0	32.0	23.0	0.0	0.0	0.0	0.0
1543a48392363e033ba5b2e1e9ac1e93	0.0	112.0	75.0	98.0	0.0	0.0	0.0	0.0	0.0	0.0	0.0	0.0	0.0	0.0
443172e38bca6c516500f7f810a4ef50	26.0	43.0	24.0	15.0	0.0	35.0	60.0	38.0	0.0	0.0	43.0	0.0	0.0	0.0
765f91d156a1d9a9a8180bc02aafbf7f	0.0	0.0	0.0	0.0	0.0	0.0	0.0	0.0	0.0	0.0	114.0	123.0	47.0	0.0
58a9a501230a08491f94325868b26299	0.0	0.0	0.0	0.0	269.0	0.0	0.0	0.0	14.0	0.0	0.0	0.0	0.0	0.0
92f1720367db58c68a96eceb9feb416a	10.0	0.0	0.0	0.0	0.0	16.0	101.0	11.0	0.0	0.0	20.0	24.0	100.0	0.0
436736dde2bcafb6b17fa5381329e9ca	0.0	121.0	44.0	52.0	0.0	0.0	0.0	0.0	64.0	0.0	0.0	0.0	0.0	0.0
9f269a0987e15d2b6f41bbec7f233e88	0.0	121.0	81.0	70.0	0.0	0.0	9.0	0.0	0.0	0.0	0.0	0.0	0.0	0.0
6610735ba168bdf1d466050e4e227c0d	0.0	0.0	0.0	0.0	0.0	0.0	0.0	19.0	48.0	213.0	0.0	0.0	0.0	0.0
37cad84cf57dea2dbad0da5d9fcad2fb	0.0	47.0	27.0	35.0	0.0	0.0	61.0	106.0	3.0	0.0	0.0	0.0	0.0	0.0
f909a207ac57c17e832480a9b164c19b	0.0	0.0	0.0	0.0	0.0	0.0	22.0	32.0	71.0	154.0	0.0	0.0	0.0	0.0
8f0fb68673a8b3c26f3fd210e29b7916	0.0	65.0	43.0	50.0	0.0	21.0	0.0	7.0	69.0	19.0	0.0	0.0	4.0	0.0
c98d9ae5d974e23928a936d21e604323	0.0	102.0	71.0	104.0	0.0	0.0	0.0	0.0	0.0	0.0	0.0	0.0	0.0	0.0
99d5712f7b5b20171e7046d1d1186331	0.0	70.0	49.0	39.0	0.0	0.0	0.0	53.0	17.0	27.0	15.0	0.0	7.0	0.0
916adc5619fafc4705b3e937d5b00c6f	0.0	38.0	0.0	0.0	0.0	81.0	0.0	0.0	117.0	41.0	0.0	0.0	0.0	0.0
2860312edd448a1de2b94e472b9f1b51	141.0	0.0	0.0	0.0	0.0	21.0	0.0	0.0	0.0	0.0	83.0	9.0	22.0	0.0
c06350a9c4427385d5bf910c5dadfc3c	0.0	134.0	64.0	78.0	0.0	0.0	0.0	0.0	0.0	0.0	0.0	0.0	0.0	0.0
2ffd05a34a92a4901d63abfe18c264d6	0.0	117.0	79.0	80.0	0.0	0.0	0.0	0.0	0.0	0.0	0.0	0.0	0.0	0.0
b16910a4e04ea09cd5bce372d115a10b	0.0	0.0	0.0	0.0	0.0	0.0	0.0	0.0	276.0	0.0	0.0	0.0	0.0	0.0
95f82cfe7a438d00e5e7af0ebf52c9fe	0.0	0.0	0.0	0.0	0.0	0.0	0.0	0.0	275.0	0.0	0.0	0.0	0.0	0.0
b9751f16879fbd474ae7a3a059a9f474	0.0	140.0	57.0	77.0	0.0	0.0	0.0	0.0	0.0	0.0	0.0	0.0	0.0	0.0
d653e4ddf98c6834bdd4324c24e5fb8f	0.0	133.0	78.0	63.0	0.0	0.0	0.0	0.0	0.0	0.0	0.0	0.0	0.0	0.0
c088396d71712aba811fd51c7b83534b	83.0	67.0	0.0	0.0	0.0	0.0	10.0	0.0	0.0	0.0	59.0	32.0	22.0	0.0
5d8f19bbabf4227a7d99ebc882d993f0	10.0	138.0	65.0	60.0	0.0	0.0	0.0	0.0	0.0	0.0	0.0	0.0	0.0	0.0
d25731d4d609a3643ee40045287257f8	0.0	101.0	77.0	79.0	0.0	0.0	0.0	0.0	0.0	0.0	0.0	16.0	0.0	0.0
cd4fc6287749bbabcb079d540d89dc87	0.0	90.0	63.0	54.0	0.0	45.0	21.0	0.0	0.0	0.0	0.0	0.0	0.0	0.0
80ca1090765a8e58b2a5180c58baa604	0.0	142.0	73.0	57.0	0.0	0.0	0.0	0.0	0.0	0.0	0.0	0.0	0.0	0.0
ed1455c9a364b63d9be173cf9a3817b0	0.0	128.0	69.0	75.0	0.0	0.0	0.0	0.0	0.0	0.0	0.0	0.0	0.0	0.0
f4c57297ecefe75f7cae850c489ca750	0.0	0.0	0.0	0.0	0.0	0.0	0.0	0.0	272.0	0.0	0.0	0.0	0.0	0.0
9e72af45764ecb6f17a458c5e2fb0b6b	0.0	0.0	0.0	0.0	0.0	0.0	0.0	0.0	150.0	122.0	0.0	0.0	0.0	0.0
7a15ac03906245390100dcecd53238bf	0.0	121.0	0.0	44.0	0.0	0.0	106.0	0.0	0.0	0.0	0.0	0.0	0.0	0.0
c0acc4ddeccf14732fdc726efab91028	0.0	0.0	0.0	0.0	0.0	0.0	118.0	50.0	103.0	0.0	0.0	0.0	0.0	0.0
c2181f02977d58628c40382be3eeabba	0.0	0.0	0.0	0.0	0.0	0.0	0.0	0.0	0.0	0.0	55.0	121.0	95.0	0.0
3869dc7384c37c3be20dcd2a9096f9d7	0.0	116.0	47.0	66.0	0.0	0.0	0.0	0.0	41.0	0.0	0.0	0.0	0.0	0.0
3c4ffc8f8aa1409f603d60c75c15f4da	0.0	109.0	50.0	49.0	0.0	0.0	0.0	25.0	0.0	37.0	0.0	0.0	0.0	0.0
10dbbe438378754c4dc5e77443b7fac4	0.0	50.0	51.0	43.0	126.0	0.0	0.0	0.0	0.0	0.0	0.0	0.0	0.0	0.0
4b64dd88805bc3dca176c6e917c92d81	0.0	11.0	0.0	0.0	0.0	112.0	8.0	0.0	0.0	0.0	83.0	56.0	0.0	0.0
f74ba015e3912fcbf88576b4087c3768	35.0	0.0	0.0	0.0	0.0	24.0	25.0	0.0	0.0	0.0	26.0	37.0	122.0	0.0
a309894898a7793786d3b7c13333485b	27.0	35.0	41.0	37.0	0.0	22.0	0.0	0.0	0.0	0.0	52.0	24.0	31.0	0.0
472fd29d55be6fe1316a92bb23d1857a	0.0	139.0	119.0	0.0	0.0	0.0	0.0	0.0	0.0	0.0	11.0	0.0	0.0	0.0
7f34fe80594ff46667b6f3875fddb600	0.0	121.0	82.0	66.0	0.0	0.0	0.0	0.0	0.0	0.0	0.0	0.0	0.0	0.0
03a72d91e2413b179b28d3213d7a92e0	9.0	46.0	24.0	13.0	0.0	37.0	48.0	24.0	40.0	0.0	23.0	0.0	4.0	0.0
2cb427e2b256a4cd6e31f81aea61504c	0.0	0.0	0.0	0.0	0.0	56.0	0.0	47.0	112.0	53.0	0.0	0.0	0.0	0.0
a69958341403f7152aa170f480d0a7e9	0.0	0.0	0.0	0.0	0.0	0.0	0.0	0.0	267.0	0.0	0.0	0.0	0.0	0.0
68262884f1021c896f8e1bf7348d773c	0.0	92.0	73.0	53.0	0.0	0.0	46.0	0.0	0.0	0.0	0.0	0.0	0.0	0.0
1aa45332969575442e0a457ef371669d	0.0	0.0	0.0	0.0	0.0	35.0	0.0	0.0	90.0	123.0	16.0	0.0	0.0	0.0
0f7c6e7aabc6a32e7f6b49b2fd6a93d7	0.0	145.0	55.0	63.0	0.0	0.0	0.0	0.0	0.0	0.0	0.0	0.0	0.0	0.0
0dc98f662b7492a2061f24cdea722c26	0.0	88.0	39.0	54.0	0.0	0.0	32.0	50.0	0.0	0.0	0.0	0.0	0.0	0.0
b8bdd0dae8ff5da16ea443841b5d2c6a	0.0	32.0	19.0	31.0	0.0	181.0	0.0	0.0	0.0	0.0	0.0	0.0	0.0	0.0
13b824ccea6f6378796b5fe2f9bd11cf	0.0	16.0	7.0	9.0	0.0	27.0	67.0	104.0	10.0	15.0	0.0	3.0	5.0	0.0
9c4a434082361719d0dc2c38a43d550a	4.0	98.0	79.0	78.0	0.0	0.0	0.0	0.0	0.0	0.0	0.0	0.0	3.0	0.0
fc01a1ca3c8df6b32c69a756ec138664	2.0	103.0	59.0	85.0	0.0	0.0	0.0	0.0	0.0	0.0	3.0	5.0	5.0	0.0
914645dec731f7174d373f9d82c80b02	0.0	0.0	0.0	0.0	0.0	38.0	0.0	70.0	66.0	85.0	3.0	0.0	0.0	0.0
f7bd4b7d813733af14ea4b4f89f4a4b8	28.0	45.0	38.0	34.0	0.0	0.0	0.0	0.0	0.0	0.0	57.0	28.0	31.0	0.0
8a2f090113b826e153aa126c6b55d3f6	0.0	0.0	0.0	0.0	0.0	0.0	0.0	0.0	0.0	0.0	143.0	0.0	114.0	0.0
3baeee42f677c920c9bf090ff4125055	0.0	110.0	46.0	51.0	0.0	10.0	0.0	0.0	39.0	0.0	0.0	0.0	0.0	0.0
7e614336ec9a71f8cc89152851e682c7	0.0	76.0	64.0	69.0	0.0	0.0	0.0	23.0	0.0	17.0	7.0	0.0	0.0	0.0
27aeff481683020385ff79cf659baf92	0.0	0.0	0.0	0.0	0.0	0.0	0.0	0.0	134.0	120.0	0.0	0.0	0.0	0.0
50d762f02390b5833833f98f837fecd7	0.0	116.0	80.0	57.0	0.0	0.0	0.0	0.0	0.0	0.0	0.0	0.0	0.0	0.0
583b482e1dd4729c78aa63d63f81cf0b	0.0	103.0	61.0	49.0	0.0	0.0	23.0	11.0	0.0	0.0	0.0	0.0	6.0	0.0
f8a9a10d4f2b7c2b95db9e16403bfb22	0.0	0.0	0.0	0.0	0.0	0.0	25.0	0.0	163.0	65.0	0.0	0.0	0.0	0.0
e2a35867731fb073463f823bb3f063d2	0.0	40.0	35.0	51.0	0.0	27.0	0.0	0.0	99.0	0.0	0.0	0.0	0.0	0.0
51c416a37530c952ad1938a7c5ebd444	0.0	0.0	0.0	0.0	0.0	0.0	0.0	0.0	0.0	32.0	191.0	0.0	29.0	0.0
8e003aeb00a49a919dab9864ad556801	0.0	59.0	65.0	62.0	0.0	0.0	36.0	29.0	0.0	0.0	0.0	0.0	0.0	0.0
1cb1cab4e83db881e4cc221cb4a980f7	0.0	107.0	65.0	68.0	0.0	0.0	0.0	0.0	10.0	0.0	0.0	0.0	0.0	0.0
bec33d0c3f5112b44bf3dfba1ef65ed8	0.0	84.0	44.0	56.0	0.0	0.0	39.0	27.0	0.0	0.0	0.0	0.0	0.0	0.0
7ac90ea3e5fdd45312965cbfd70cff27	0.0	0.0	0.0	0.0	0.0	25.0	73.0	49.0	0.0	0.0	81.0	22.0	0.0	0.0
ad9e0017fee8f1eaaf3c142b2c9fa459	0.0	0.0	0.0	0.0	0.0	0.0	0.0	30.0	139.0	72.0	8.0	0.0	0.0	0.0
f65d982c96404c2a79b6a0e675a6af5d	0.0	0.0	0.0	0.0	0.0	0.0	0.0	0.0	234.0	15.0	0.0	0.0	0.0	0.0
87f8a839205a6461ec19bec252bb48c1	0.0	128.0	64.0	56.0	0.0	0.0	0.0	0.0	0.0	0.0	0.0	0.0	0.0	0.0
caf4c05eda5d71ded23f2c64959ee6b3	0.0	112.0	52.0	78.0	0.0	0.0	6.0	0.0	0.0	0.0	0.0	0.0	0.0	0.0
8814cdd0ce4e7f01c1902dcc2347d9b7	0.0	49.0	53.0	46.0	0.0	0.0	55.0	45.0	0.0	0.0	0.0	0.0	0.0	0.0
4e13a88e53218d14be546cb458cf87cf	0.0	0.0	0.0	0.0	0.0	0.0	0.0	0.0	233.0	15.0	0.0	0.0	0.0	0.0
17e46263eeb06de48449fa8ffa6d9f47	0.0	0.0	0.0	0.0	0.0	0.0	0.0	0.0	0.0	10.0	128.0	35.0	75.0	0.0
e8b0b0af1c23369fa523cfd66c26f510	0.0	175.0	0.0	72.0	0.0	0.0	0.0	0.0	0.0	0.0	0.0	0.0	0.0	0.0
f3405d9cc91b3f721f4a4415cc1cf8a3	0.0	79.0	57.0	57.0	0.0	0.0	36.0	18.0	0.0	0.0	0.0	0.0	0.0	0.0
623ce97df3f111e94b57649bb2b1991a	0.0	25.0	0.0	0.0	0.0	0.0	31.0	89.0	22.0	80.0	0.0	0.0	0.0	0.0
4287f9128329cdf3a30826b67cc0126c	0.0	0.0	0.0	0.0	0.0	84.0	0.0	0.0	128.0	34.0	0.0	0.0	0.0	0.0
d391582e27329b0ca8a006738a29c181	0.0	0.0	0.0	0.0	0.0	0.0	0.0	0.0	71.0	0.0	175.0	0.0	0.0	0.0
8538a382a5e13c35187932b61abc532d	18.0	27.0	0.0	38.0	0.0	56.0	0.0	0.0	0.0	0.0	30.0	29.0	47.0	0.0
9cd4e1e55a4fdbae9eb8e3d2db6d0212	0.0	0.0	0.0	0.0	0.0	0.0	0.0	0.0	245.0	0.0	0.0	0.0	0.0	0.0
c1ba9460c7bf03aa48206243533697a9	0.0	108.0	0.0	0.0	0.0	0.0	0.0	0.0	136.0	0.0	0.0	0.0	0.0	0.0
8bb2644d07ddab844c3ce80e74d8bba2	0.0	0.0	2.0	0.0	0.0	0.0	0.0	0.0	242.0	0.0	0.0	0.0	0.0	0.0
0b99f7d067cddf06d2039288eda2a691	0.0	0.0	0.0	0.0	244.0	0.0	0.0	0.0	0.0	0.0	0.0	0.0	0.0	0.0
8ee10737806b5bd2a3fcafa88f711d69	0.0	0.0	0.0	0.0	0.0	71.0	35.0	94.0	0.0	0.0	24.0	0.0	20.0	0.0
dfd94e04bf9a45dfc4562795263e3a03	0.0	0.0	0.0	0.0	0.0	0.0	0.0	0.0	210.0	34.0	0.0	0.0	0.0	0.0
59157b8db2b0c3722a41ed9cf693e3f2	0.0	0.0	0.0	0.0	0.0	0.0	0.0	0.0	154.0	90.0	0.0	0.0	0.0	0.0
ef2c7c1430fae635534a935a2087f313	0.0	96.0	65.0	75.0	0.0	0.0	0.0	0.0	0.0	0.0	7.0	0.0	0.0	0.0
24123f1ed7bffb358f47b0eacfb43e98	0.0	0.0	0.0	0.0	0.0	0.0	0.0	37.0	168.0	37.0	0.0	0.0	0.0	0.0
750ba0e2bb9fe55d1cbb3b4eaadc1981	0.0	113.0	56.0	72.0	0.0	0.0	0.0	0.0	0.0	0.0	0.0	0.0	0.0	0.0
5938bbfab01cc4b328e1c4e65706275f	0.0	83.0	67.0	39.0	0.0	0.0	0.0	0.0	51.0	0.0	0.0	0.0	0.0	0.0
aa8553ebd7e5dcc37bd9437e0cbe425e	0.0	0.0	0.0	0.0	0.0	0.0	0.0	0.0	224.0	16.0	0.0	0.0	0.0	0.0
bf62cd58a0a3329c5022a80d3a4c2f6e	0.0	108.0	0.0	100.0	0.0	0.0	0.0	0.0	31.0	0.0	0.0	0.0	0.0	0.0
636a046a3ed2530d0422ad32c1560a66	0.0	103.0	81.0	55.0	0.0	0.0	0.0	0.0	0.0	0.0	0.0	0.0	0.0	0.0
e0275fca226f94283c0ec3cf6a287821	0.0	0.0	0.0	0.0	0.0	0.0	0.0	0.0	239.0	0.0	0.0	0.0	0.0	0.0
7595d99589b8d35449028f5e44a1a435	44.0	0.0	0.0	0.0	0.0	0.0	0.0	0.0	0.0	0.0	115.0	22.0	57.0	0.0
91cbf4ce8dd6a6f20cebc29b3909cfca	0.0	89.0	67.0	37.0	0.0	0.0	27.0	18.0	0.0	0.0	0.0	0.0	0.0	0.0
25cf61fa563b397ce79c93fa98e7f5a7	0.0	80.0	74.0	84.0	0.0	0.0	0.0	0.0	0.0	0.0	0.0	0.0	0.0	0.0
f120ef7fdc1d1bc82a59ee02f4fa3683	0.0	0.0	0.0	0.0	0.0	0.0	0.0	0.0	237.0	0.0	0.0	0.0	0.0	0.0
090a5b13b50ccc3fa1caef9c6daa17f0	78.0	0.0	0.0	0.0	0.0	0.0	0.0	0.0	0.0	0.0	66.0	26.0	66.0	0.0
6b4e78e334dcca7ef87fe0d91b937ad6	25.0	40.0	0.0	28.0	0.0	0.0	0.0	0.0	0.0	0.0	66.0	37.0	40.0	0.0
d7728d32ed060398d36f0ea1cfbb8c01	0.0	37.0	0.0	46.0	0.0	0.0	0.0	57.0	55.0	41.0	0.0	0.0	0.0	0.0
990098b8f9616094236616556889b3ef	0.0	154.0	0.0	81.0	0.0	0.0	0.0	0.0	0.0	0.0	0.0	0.0	0.0	0.0
4a4da2ad9a52d30c32a1e699059d4d8b	0.0	132.0	103.0	0.0	0.0	0.0	0.0	0.0	0.0	0.0	0.0	0.0	0.0	0.0
ad111e8ef39632eb13661b941216973f	77.0	0.0	0.0	0.0	0.0	0.0	0.0	0.0	0.0	0.0	68.0	67.0	22.0	0.0
f06226a7bc73b72e49227c5f8b849a8f	0.0	120.0	74.0	40.0	0.0	0.0	0.0	0.0	0.0	0.0	0.0	0.0	0.0	0.0
4302e172532d4c691b53ee5030ebc127	0.0	56.0	26.0	37.0	0.0	0.0	57.0	58.0	0.0	0.0	0.0	0.0	0.0	0.0
1c86ea22f386214cb7c2c2e9e1dd7853	0.0	101.0	56.0	73.0	0.0	0.0	0.0	0.0	0.0	0.0	0.0	0.0	3.0	0.0
8d88c0f9f177f9ac76e2b8ce1d0f8522	0.0	0.0	15.0	8.0	0.0	0.0	112.0	98.0	0.0	0.0	0.0	0.0	0.0	0.0
1f2c1f1c3ddc37ef715e9b448776512b	0.0	84.0	56.0	65.0	0.0	0.0	0.0	0.0	27.0	0.0	0.0	0.0	0.0	0.0
7d7d2f296602df85f1660a9686cd6b21	0.0	0.0	0.0	0.0	0.0	0.0	0.0	0.0	231.0	0.0	0.0	0.0	0.0	0.0
c9f782ab75366261c9c34ea1ec47e1fa	0.0	0.0	0.0	0.0	0.0	0.0	0.0	0.0	231.0	0.0	0.0	0.0	0.0	0.0
24b578131702a8fd35483b16aeeb93ee	29.0	15.0	8.0	0.0	0.0	0.0	0.0	0.0	0.0	0.0	105.0	22.0	50.0	0.0
595346ce49bf911a55723019ae769524	0.0	0.0	0.0	0.0	0.0	0.0	0.0	0.0	229.0	0.0	0.0	0.0	0.0	0.0
b55792eb365a7f77b7860e7b59b70afc	0.0	0.0	0.0	0.0	0.0	0.0	0.0	0.0	229.0	0.0	0.0	0.0	0.0	0.0
1bc9a1226c3698268be0531dd005d53f	0.0	0.0	0.0	0.0	0.0	0.0	0.0	0.0	228.0	0.0	0.0	0.0	0.0	0.0
5374b2f2cfd2fb1415a1acdb0df716e9	63.0	0.0	0.0	0.0	0.0	46.0	23.0	20.0	0.0	0.0	42.0	17.0	16.0	0.0
16c1e90853ad4b0f2412b26d501b3eb4	0.0	0.0	0.0	0.0	0.0	0.0	0.0	0.0	226.0	0.0	0.0	0.0	0.0	0.0
1fa42aed58e13121d915ab9f79994959	23.0	0.0	0.0	0.0	0.0	30.0	3.0	0.0	0.0	0.0	75.0	59.0	35.0	0.0
bfed5f5c453332ce1a4eba7cf3049085	0.0	80.0	68.0	77.0	0.0	0.0	0.0	0.0	0.0	0.0	0.0	0.0	0.0	0.0
3516215d5db7f6781fe7331aca011932	0.0	71.0	41.0	57.0	0.0	0.0	0.0	32.0	0.0	0.0	24.0	0.0	0.0	0.0
cf93a75ae5605559e801df2c3842fb4c	0.0	0.0	0.0	0.0	0.0	0.0	0.0	0.0	225.0	0.0	0.0	0.0	0.0	0.0
006c1f136efc799fe8ddb0b6c5b55e4c	0.0	115.0	43.0	66.0	0.0	0.0	0.0	0.0	0.0	0.0	0.0	0.0	0.0	0.0
aa035c51043b15490d4558b062a612ae	0.0	81.0	81.0	51.0	0.0	0.0	0.0	11.0	0.0	0.0	0.0	0.0	0.0	0.0
8b1d2ad098c62ae450bd5a9c1c65c980	0.0	0.0	0.0	0.0	0.0	0.0	0.0	29.0	195.0	0.0	0.0	0.0	0.0	0.0
3db571818ce0d32118656f000751d30b	0.0	223.0	0.0	0.0	0.0	0.0	0.0	0.0	0.0	0.0	0.0	0.0	0.0	0.0
2fb3ffb4d2b7ed016967964084eaabbd	0.0	46.0	0.0	0.0	0.0	177.0	0.0	0.0	0.0	0.0	0.0	0.0	0.0	0.0
b70f42becdc3f02cc2a7b6284f8f19f1	0.0	99.0	55.0	60.0	0.0	0.0	0.0	0.0	8.0	0.0	0.0	0.0	0.0	0.0
625b3bc5da0d5b8a1ffda32e4501d0f1	0.0	93.0	50.0	0.0	0.0	0.0	0.0	0.0	79.0	0.0	0.0	0.0	0.0	0.0
df971cbf68b9d91301f557af45c65454	0.0	31.0	21.0	0.0	0.0	20.0	0.0	0.0	43.0	0.0	26.0	23.0	58.0	0.0
e86f39c772caa19380d9ce16b33b7a64	60.0	0.0	0.0	0.0	0.0	14.0	0.0	0.0	0.0	0.0	81.0	25.0	41.0	0.0
b121b6d5ff42412694bab612042ac625	13.0	69.0	31.0	41.0	0.0	7.0	0.0	8.0	0.0	0.0	18.0	14.0	19.0	0.0
c0e7fa5b3a0887f1e2264f73ce391c54	0.0	72.0	37.0	48.0	0.0	0.0	16.0	18.0	0.0	25.0	0.0	0.0	4.0	0.0
34333aca18b9467c8d1c7abcb708c05b	0.0	20.0	0.0	14.0	0.0	17.0	0.0	19.0	133.0	17.0	0.0	0.0	0.0	0.0
e725e4439238bbf832df8a31cd9870a4	0.0	0.0	0.0	0.0	220.0	0.0	0.0	0.0	0.0	0.0	0.0	0.0	0.0	0.0
2c7168ee385176ea4961facb24c63cad	0.0	108.0	59.0	52.0	0.0	0.0	0.0	0.0	0.0	0.0	0.0	0.0	0.0	0.0
689f1824bb6bdee2c08f619da1b57eb4	0.0	0.0	0.0	0.0	219.0	0.0	0.0	0.0	0.0	0.0	0.0	0.0	0.0	0.0
fd91568b2f67f861ab0edbf488dea33b	0.0	0.0	0.0	0.0	0.0	19.0	0.0	0.0	200.0	0.0	0.0	0.0	0.0	0.0
04ceb23cccbf83aad0fcbad8e7953c44	0.0	0.0	0.0	0.0	0.0	0.0	0.0	0.0	219.0	0.0	0.0	0.0	0.0	0.0
cf17888122edc2ddd5c73d972891b6e1	0.0	97.0	60.0	60.0	0.0	0.0	0.0	0.0	0.0	0.0	0.0	0.0	0.0	0.0
fb23b0ce92bbf8096506560aad696a3c	0.0	0.0	0.0	0.0	0.0	0.0	0.0	0.0	217.0	0.0	0.0	0.0	0.0	0.0
0d7d6a39ec308ab07b864a61e273452c	0.0	97.0	54.0	65.0	0.0	0.0	0.0	0.0	0.0	0.0	0.0	0.0	0.0	0.0
74eeb63b7220039b93ea020557d9ee92	0.0	106.0	56.0	53.0	0.0	0.0	0.0	0.0	0.0	0.0	0.0	0.0	0.0	0.0
9734944beb738cd07638c6c9e62255b4	0.0	85.0	60.0	70.0	0.0	0.0	0.0	0.0	0.0	0.0	0.0	0.0	0.0	0.0
62288a087372bef2549351f389a51027	16.0	27.0	15.0	18.0	0.0	51.0	0.0	0.0	0.0	0.0	14.0	14.0	59.0	0.0
c41e38ec0abb37da79acd32fd3cd7c66	0.0	0.0	0.0	0.0	214.0	0.0	0.0	0.0	0.0	0.0	0.0	0.0	0.0	0.0
64a95df2a5e7f1cd700732866d19c3c2	0.0	0.0	0.0	0.0	0.0	0.0	0.0	36.0	88.0	90.0	0.0	0.0	0.0	0.0
9c5ca166ae7b5f9833e77b37e0fb0e18	0.0	107.0	53.0	53.0	0.0	0.0	0.0	0.0	0.0	0.0	0.0	0.0	0.0	0.0
ea7d67034760b4ade779d066575504cb	0.0	52.0	0.0	61.0	0.0	0.0	60.0	40.0	0.0	0.0	0.0	0.0	0.0	0.0
8ea2c4b6024295f229dd2fb57ca261f0	0.0	141.0	71.0	0.0	0.0	0.0	0.0	0.0	0.0	0.0	0.0	0.0	0.0	0.0
f3aa019bd3c92a5235ac673dce00034f	0.0	137.0	40.0	35.0	0.0	0.0	0.0	0.0	0.0	0.0	0.0	0.0	0.0	0.0
fe38288024b02ff1b28b366c422f0173	0.0	0.0	0.0	0.0	0.0	0.0	0.0	0.0	212.0	0.0	0.0	0.0	0.0	0.0
15a6de3981b9c6bed0697e1fb199bc2d	0.0	88.0	60.0	63.0	0.0	0.0	0.0	0.0	0.0	0.0	0.0	0.0	0.0	0.0
31b23df96901a1bd5e1959c8ef4e0331	0.0	0.0	0.0	0.0	0.0	0.0	0.0	0.0	211.0	0.0	0.0	0.0	0.0	0.0
2e85d49e255445ed048781f6292ef0b1	0.0	136.0	0.0	74.0	0.0	0.0	0.0	0.0	0.0	0.0	0.0	0.0	0.0	0.0
8871df4e3272c627a1037c3bc13f234e	0.0	69.0	39.0	51.0	0.0	0.0	15.0	15.0	0.0	21.0	0.0	0.0	0.0	0.0
c11468d35e3e0a4334dd07a92ead7eef	0.0	68.0	22.0	47.0	0.0	0.0	0.0	0.0	9.0	64.0	0.0	0.0	0.0	0.0
4b005828a1cb2add3f80a8d6f4d87519	0.0	0.0	0.0	0.0	0.0	38.0	0.0	0.0	100.0	0.0	72.0	0.0	0.0	0.0
d829bee4984f82ffc2453212157caf96	0.0	0.0	0.0	0.0	0.0	0.0	0.0	0.0	0.0	0.0	0.0	0.0	0.0	209.0
e41ccff6b086bac68198a11d750d1cc7	0.0	149.0	59.0	0.0	0.0	0.0	0.0	0.0	0.0	0.0	0.0	0.0	0.0	0.0
00aad3e0f327002ff6e3cd07a95caede	0.0	85.0	55.0	68.0	0.0	0.0	0.0	0.0	0.0	0.0	0.0	0.0	0.0	0.0
0993dca8b8679c4ba1957be6b7254855	0.0	35.0	31.0	21.0	0.0	0.0	59.0	62.0	0.0	0.0	0.0	0.0	0.0	0.0
1d1ba651814e1415fdf4eab3c393b955	0.0	0.0	0.0	0.0	0.0	0.0	0.0	0.0	208.0	0.0	0.0	0.0	0.0	0.0
9aa08531964cd71d315bf907a78bc077	0.0	95.0	61.0	47.0	0.0	0.0	0.0	0.0	0.0	0.0	0.0	0.0	4.0	0.0
6965beb78aeacec8ded8f3beaf1b44c4	0.0	78.0	47.0	82.0	0.0	0.0	0.0	0.0	0.0	0.0	0.0	0.0	0.0	0.0
cff8dd8d04aab8e5745bcfb0777549b2	0.0	0.0	37.0	0.0	0.0	52.0	46.0	72.0	0.0	0.0	0.0	0.0	0.0	0.0
190b92e29501929df6620af8034174ae	0.0	108.0	35.0	62.0	0.0	0.0	0.0	0.0	0.0	0.0	0.0	0.0	0.0	0.0
b134358da33eeb7ce81bf50b2f4a3cf5	0.0	105.0	43.0	57.0	0.0	0.0	0.0	0.0	0.0	0.0	0.0	0.0	0.0	0.0
9a3af708aa2686e1d6115aeabbcf3cfd	0.0	83.0	42.0	48.0	0.0	0.0	32.0	0.0	0.0	0.0	0.0	0.0	0.0	0.0
e49cf46d5162fbaa331ff4a4b5c711b0	0.0	78.0	62.0	65.0	0.0	0.0	0.0	0.0	0.0	0.0	0.0	0.0	0.0	0.0
b073dc8e93f2961a8cc339b71a3c6f5e	0.0	34.0	0.0	12.0	0.0	0.0	70.0	74.0	0.0	15.0	0.0	0.0	0.0	0.0
6989211ae71ecfc428e4cb387830427a	0.0	0.0	0.0	0.0	0.0	0.0	40.0	0.0	65.0	54.0	29.0	0.0	17.0	0.0
97eb5bfddf2cfed5231c1b5d16b1e2d9	0.0	0.0	0.0	0.0	0.0	49.0	0.0	0.0	155.0	0.0	0.0	0.0	0.0	0.0
a7f8bdf3e357243c716eaa07017279b6	0.0	103.0	53.0	47.0	0.0	0.0	0.0	0.0	0.0	0.0	0.0	0.0	0.0	0.0
649f95fa440c689e0bd75a73e4825255	0.0	77.0	33.0	36.0	0.0	0.0	29.0	28.0	0.0	0.0	0.0	0.0	0.0	0.0
d2012f74e2d4f85905674cd0f891b836	0.0	112.0	44.0	46.0	0.0	0.0	0.0	0.0	0.0	0.0	0.0	0.0	0.0	0.0
6472eb8b1e09f892aca2f23182962903	0.0	66.0	34.0	52.0	0.0	0.0	0.0	0.0	50.0	0.0	0.0	0.0	0.0	0.0
7879c1b3853f3cd41f0f667a8cba469b	0.0	44.0	25.0	0.0	0.0	0.0	33.0	90.0	0.0	10.0	0.0	0.0	0.0	0.0
72d9c32c2a5bccaa34638eb74916e922	39.0	25.0	0.0	21.0	0.0	95.0	0.0	0.0	0.0	0.0	21.0	0.0	0.0	0.0
3c5055ec78b0d3a16f7c4b75f559af91	24.0	6.0	0.0	0.0	0.0	83.0	0.0	0.0	0.0	0.0	0.0	0.0	88.0	0.0
ede7c4645eae753ffcd58b813489e73a	0.0	110.0	49.0	42.0	0.0	0.0	0.0	0.0	0.0	0.0	0.0	0.0	0.0	0.0
dbd500ec9c52f7173d2f8b962c889f0a	0.0	60.0	60.0	81.0	0.0	0.0	0.0	0.0	0.0	0.0	0.0	0.0	0.0	0.0
8f8f29f28429498db407bfdeb68c604d	0.0	42.0	36.0	0.0	0.0	0.0	34.0	70.0	0.0	0.0	19.0	0.0	0.0	0.0
85ed1afb50c77ae459fe37e6c0206ffd	14.0	72.0	35.0	45.0	0.0	0.0	0.0	0.0	0.0	0.0	0.0	15.0	19.0	0.0
552b2e6b06aff5e457765df86c108618	0.0	114.0	45.0	41.0	0.0	0.0	0.0	0.0	0.0	0.0	0.0	0.0	0.0	0.0
4231c0e22d02619ed9ba049d6dc49d00	0.0	84.0	40.0	68.0	0.0	0.0	8.0	0.0	0.0	0.0	0.0	0.0	0.0	0.0
e81f6d9916ef6ba0c290e586b2183b5f	0.0	66.0	65.0	69.0	0.0	0.0	0.0	0.0	0.0	0.0	0.0	0.0	0.0	0.0
053c09f43a8ca677723e10f2650f95aa	0.0	0.0	0.0	0.0	0.0	0.0	0.0	0.0	155.0	45.0	0.0	0.0	0.0	0.0
f8729c883e31feabbf336505335f519e	7.0	64.0	36.0	30.0	0.0	23.0	0.0	0.0	0.0	0.0	18.0	9.0	12.0	0.0
aa11b7fecbbca304e3b36cce12f5bb66	0.0	0.0	0.0	0.0	0.0	0.0	0.0	0.0	199.0	0.0	0.0	0.0	0.0	0.0
6a4d85714aa5465e75d7a920edad7a6b	0.0	0.0	0.0	0.0	0.0	0.0	0.0	0.0	183.0	16.0	0.0	0.0	0.0	0.0
d582d8faad5d33fe149ed4e480d6a6e1	0.0	0.0	0.0	0.0	0.0	0.0	0.0	0.0	60.0	0.0	90.0	0.0	49.0	0.0
64afa46994adcbc4ae47a619b3b4b415	0.0	0.0	0.0	0.0	0.0	37.0	0.0	0.0	161.0	0.0	0.0	0.0	0.0	0.0
84e7ff9bf4762d8524c746622aa60588	0.0	73.0	0.0	37.0	0.0	0.0	0.0	0.0	68.0	19.0	0.0	0.0	0.0	0.0
6bd8bdc08257c42a63097ae67d5590ff	0.0	0.0	0.0	0.0	0.0	0.0	0.0	34.0	56.0	107.0	0.0	0.0	0.0	0.0
02d4662f38331fab99afe76474f5ae03	0.0	0.0	0.0	0.0	0.0	139.0	28.0	29.0	0.0	0.0	0.0	0.0	0.0	0.0
0e73d583415674d05fb8c2778fb9b695	0.0	68.0	48.0	43.0	0.0	17.0	0.0	6.0	0.0	0.0	0.0	13.0	0.0	0.0
50be1cc8e0a17ff2c871418fce496b49	0.0	0.0	0.0	0.0	0.0	0.0	0.0	0.0	195.0	0.0	0.0	0.0	0.0	0.0
3b170b4aea212c1470598e0d3d103288	0.0	118.0	42.0	34.0	0.0	0.0	0.0	0.0	0.0	0.0	0.0	0.0	0.0	0.0
99b9f21cc0088261df7df95d28c71103	0.0	50.0	35.0	54.0	0.0	0.0	0.0	20.0	0.0	35.0	0.0	0.0	0.0	0.0
7945d4b6d82f1ea07fa1a98244886e20	0.0	0.0	0.0	0.0	0.0	0.0	67.0	62.0	28.0	37.0	0.0	0.0	0.0	0.0
ef65bd286a589c2f5a4acd25a60d2fce	0.0	0.0	0.0	0.0	0.0	0.0	0.0	0.0	194.0	0.0	0.0	0.0	0.0	0.0
9879a750c4dcbe94271efc3a64a8dcc6	0.0	88.0	53.0	52.0	0.0	0.0	0.0	0.0	0.0	0.0	0.0	0.0	0.0	0.0
4ffd0d96dcf37921a8bd6d571abf5e38	0.0	0.0	0.0	0.0	0.0	193.0	0.0	0.0	0.0	0.0	0.0	0.0	0.0	0.0
b31d9578151d50a1e93307f56e99ce4e	0.0	57.0	30.0	36.0	0.0	18.0	26.0	25.0	0.0	0.0	0.0	0.0	0.0	0.0
637b9b3f4d1cbb1a10c07817619cdf69	0.0	0.0	0.0	0.0	191.0	0.0	0.0	0.0	0.0	0.0	0.0	0.0	0.0	0.0
65d43491988bfe557da4d86a5ba25dae	0.0	0.0	0.0	0.0	181.0	0.0	0.0	0.0	0.0	0.0	10.0	0.0	0.0	0.0
4846dc7aea1400b11dc3a785dd7daf81	0.0	0.0	0.0	0.0	0.0	0.0	0.0	0.0	123.0	68.0	0.0	0.0	0.0	0.0
4868f68cb08976c69be8ccd94b1df424	0.0	35.0	22.0	16.0	0.0	0.0	79.0	38.0	0.0	0.0	0.0	0.0	0.0	0.0
33730981125ce69a8726bada07ee7ff6	0.0	0.0	0.0	0.0	0.0	0.0	0.0	0.0	190.0	0.0	0.0	0.0	0.0	0.0
3981fa79dd216434100dd249381e3184	0.0	82.0	0.0	0.0	107.0	0.0	0.0	0.0	0.0	0.0	0.0	0.0	0.0	0.0
55ce73379b753a6d229a4febc0b1362d	54.0	27.0	0.0	23.0	0.0	33.0	0.0	0.0	0.0	0.0	29.0	0.0	22.0	0.0
f7affcd94c5fec154f974e1975a4cb40	0.0	78.0	61.0	49.0	0.0	0.0	0.0	0.0	0.0	0.0	0.0	0.0	0.0	0.0
09b2aadbde89fc4e9d2a28a36aaebb4f	0.0	0.0	0.0	0.0	188.0	0.0	0.0	0.0	0.0	0.0	0.0	0.0	0.0	0.0
d0ca72cd6be55912b0fc621baed17f75	0.0	96.0	50.0	41.0	0.0	0.0	0.0	0.0	0.0	0.0	0.0	0.0	0.0	0.0
786d172a2bbeeb5a6537df06c9faf50b	11.0	10.0	7.0	9.0	0.0	85.0	9.0	4.0	0.0	0.0	7.0	12.0	32.0	0.0
80269c215b4be147eb458ca84bf9f0bc	0.0	68.0	63.0	55.0	0.0	0.0	0.0	0.0	0.0	0.0	0.0	0.0	0.0	0.0
b635eb16b78b32111d85dd15df7f8032	0.0	56.0	42.0	0.0	0.0	0.0	0.0	17.0	25.0	31.0	0.0	15.0	0.0	0.0
19c13eb77b68344efcbe25163d903369	0.0	51.0	25.0	36.0	0.0	0.0	23.0	23.0	0.0	28.0	0.0	0.0	0.0	0.0
a56b787e7914d63791c10e9148d1c94c	0.0	0.0	0.0	0.0	0.0	7.0	73.0	3.0	49.0	54.0	0.0	0.0	0.0	0.0
f98522d5a3aaf8ad9b200dd2ae2477e3	0.0	0.0	0.0	0.0	0.0	0.0	0.0	33.0	139.0	14.0	0.0	0.0	0.0	0.0
5fa97937c087ce34a2c5ae09d617b9b1	0.0	0.0	0.0	0.0	0.0	0.0	0.0	0.0	128.0	58.0	0.0	0.0	0.0	0.0
a2c2464a1dbdf270b83a9b89ec2fe815	0.0	97.0	34.0	54.0	0.0	0.0	0.0	0.0	0.0	0.0	0.0	0.0	0.0	0.0
62ddf4d21584dddcc879dd895ea298d8	0.0	27.0	0.0	0.0	0.0	48.0	0.0	0.0	0.0	0.0	54.0	56.0	0.0	0.0
e4bcadbc826ad58a7e63d518951a3e59	0.0	0.0	0.0	0.0	0.0	0.0	0.0	0.0	158.0	27.0	0.0	0.0	0.0	0.0
2dd9e191a81b91117b77df5eac7e6048	0.0	0.0	0.0	0.0	0.0	0.0	0.0	0.0	0.0	0.0	0.0	0.0	0.0	183.0
5295f710a2863493c3fa6f5d104b7f85	0.0	93.0	40.0	49.0	0.0	0.0	0.0	0.0	0.0	0.0	0.0	0.0	0.0	0.0
11095f169166828864d52d5f274cbcbb	0.0	86.0	52.0	44.0	0.0	0.0	0.0	0.0	0.0	0.0	0.0	0.0	0.0	0.0
982541ec56cee3f9152a8fb03c410da9	0.0	73.0	0.0	54.0	0.0	0.0	0.0	0.0	0.0	0.0	25.0	30.0	0.0	0.0
cc52d51ef41eda377f6f26631bdaa7b7	0.0	0.0	0.0	0.0	0.0	0.0	0.0	0.0	151.0	31.0	0.0	0.0	0.0	0.0
2b83c5ea4f51b77705b1ff6883915afb	0.0	58.0	57.0	0.0	0.0	21.0	0.0	0.0	0.0	0.0	0.0	0.0	45.0	0.0
79028721c6cf7ec53c17d90142a8a747	0.0	32.0	0.0	0.0	0.0	0.0	0.0	42.0	45.0	62.0	0.0	0.0	0.0	0.0
2a64f7117c72e249a9c2e5850fd6eb3e	0.0	65.0	0.0	0.0	0.0	0.0	0.0	60.0	0.0	55.0	0.0	0.0	0.0	0.0
108a95c5ec00d86772b454933ff370bc	0.0	61.0	36.0	46.0	0.0	0.0	0.0	0.0	27.0	10.0	0.0	0.0	0.0	0.0
77c2088466297f8fb762e39b8d09ce3e	0.0	0.0	0.0	0.0	0.0	0.0	43.0	137.0	0.0	0.0	0.0	0.0	0.0	0.0
8a78040f2f33e70a2a5cd4cc06229eb9	0.0	0.0	0.0	0.0	0.0	0.0	8.0	0.0	172.0	0.0	0.0	0.0	0.0	0.0
20c6d34f0c0b12c194816b0e8fcffdff	0.0	0.0	0.0	0.0	0.0	0.0	0.0	0.0	180.0	0.0	0.0	0.0	0.0	0.0
559508f3a961b5def8e5b68fcca7ecee	0.0	80.0	59.0	40.0	0.0	0.0	0.0	0.0	0.0	0.0	0.0	0.0	0.0	0.0
7ba641233be0e78ce5ba33168a0f9668	0.0	60.0	28.0	33.0	0.0	58.0	0.0	0.0	0.0	0.0	0.0	0.0	0.0	0.0
23fdc247e14a3de5398cbc82805fe4ac	0.0	29.0	12.0	15.0	0.0	34.0	0.0	0.0	0.0	62.0	19.0	8.0	0.0	0.0
fb2b00a8282741f54559c37f4ce69e20	0.0	0.0	0.0	0.0	0.0	0.0	0.0	0.0	126.0	53.0	0.0	0.0	0.0	0.0
9c5fa4a022eb0f17e550f5416e666d3c	28.0	74.0	29.0	32.0	0.0	0.0	0.0	0.0	0.0	0.0	0.0	0.0	15.0	0.0
cec2a11582d79e69ecc3b65afb8b6e50	0.0	76.0	54.0	48.0	0.0	0.0	0.0	0.0	0.0	0.0	0.0	0.0	0.0	0.0
d81f75adde4397bf405a869d81c3fbb6	0.0	43.0	29.0	37.0	0.0	0.0	34.0	35.0	0.0	0.0	0.0	0.0	0.0	0.0
29e5a85ee31a01a998202d086218e6ed	0.0	26.0	0.0	0.0	0.0	0.0	45.0	67.0	0.0	40.0	0.0	0.0	0.0	0.0
a0f0d092f79107b53ba295b8f1aefb52	0.0	0.0	0.0	0.0	0.0	0.0	0.0	0.0	53.0	125.0	0.0	0.0	0.0	0.0
ce4a7e530cf68cdaa2431fbf14d8adbc	0.0	73.0	60.0	44.0	0.0	0.0	0.0	0.0	0.0	0.0	0.0	0.0	0.0	0.0
d1f379daa0fd84cf84042b4da847008b	0.0	60.0	21.0	29.0	0.0	0.0	0.0	0.0	56.0	11.0	0.0	0.0	0.0	0.0
f861deb66544ba4ec7c03c678f5b06fb	16.0	43.0	38.0	28.0	0.0	20.0	0.0	0.0	0.0	0.0	21.0	9.0	0.0	0.0
bd7e0ad74eda8fa1477cf524f4f19e6f	0.0	86.0	45.0	43.0	0.0	0.0	0.0	0.0	0.0	0.0	0.0	0.0	0.0	0.0
0827399539fe2cb37fe3878086cef65a	0.0	76.0	47.0	35.0	0.0	0.0	0.0	0.0	0.0	0.0	0.0	11.0	5.0	0.0
88f380177c2361f60b7fe930911fec0c	47.0	0.0	0.0	0.0	0.0	27.0	16.0	16.0	0.0	0.0	29.0	10.0	27.0	0.0
c52c131acca367ff613a76978e39fd22	8.0	11.0	10.0	0.0	0.0	44.0	0.0	0.0	0.0	0.0	35.0	34.0	30.0	0.0
10fff1882a677502c11af136cb1ad609	0.0	63.0	26.0	12.0	0.0	70.0	0.0	0.0	0.0	0.0	0.0	0.0	0.0	0.0
25b2721dfbb2bce10d8b1c14bc512884	0.0	0.0	0.0	0.0	0.0	0.0	0.0	0.0	171.0	0.0	0.0	0.0	0.0	0.0
9553e620cb553c2a8a1a9c205490c743	32.0	37.0	24.0	23.0	0.0	24.0	0.0	0.0	0.0	0.0	30.0	0.0	0.0	0.0
a5e4fa1c4fdfceff6877d2ba21ae0b91	0.0	87.0	40.0	43.0	0.0	0.0	0.0	0.0	0.0	0.0	0.0	0.0	0.0	0.0
dbf891b81810bae2731119f803bdd6e6	0.0	12.0	13.0	0.0	0.0	33.0	0.0	39.0	53.0	20.0	0.0	0.0	0.0	0.0
9fd652cebcda9bd75af20843c91b5d52	0.0	0.0	14.0	15.0	0.0	9.0	29.0	53.0	21.0	29.0	0.0	0.0	0.0	0.0
5759360a141bae2e78568f3006c6abad	0.0	0.0	0.0	54.0	116.0	0.0	0.0	0.0	0.0	0.0	0.0	0.0	0.0	0.0
08220c63935e60ddef0830ac0cd3a6c5	0.0	0.0	0.0	0.0	0.0	37.0	0.0	0.0	133.0	0.0	0.0	0.0	0.0	0.0
4d427f9afe095022fd2d296be179f5c7	0.0	0.0	0.0	0.0	0.0	0.0	169.0	0.0	0.0	0.0	0.0	0.0	0.0	0.0
fc7a29d11f1179418bf5cd389879d110	36.0	0.0	0.0	0.0	0.0	0.0	0.0	0.0	0.0	0.0	62.0	30.0	40.0	0.0
c335fa0220ac67d9e083b76aca958520	0.0	76.0	37.0	33.0	0.0	0.0	0.0	0.0	22.0	0.0	0.0	0.0	0.0	0.0
ac07a06fa63c43641e5e465952112451	0.0	42.0	35.0	23.0	0.0	0.0	29.0	39.0	0.0	0.0	0.0	0.0	0.0	0.0
aef36f70050779b27ca467243cc77114	0.0	0.0	0.0	0.0	0.0	0.0	52.0	11.0	34.0	71.0	0.0	0.0	0.0	0.0
c5f20d762874a3296511198ca816696c	0.0	0.0	0.0	0.0	0.0	0.0	15.0	0.0	91.0	62.0	0.0	0.0	0.0	0.0
2af4a274f019e35b4c876f0398d4dcb7	0.0	0.0	0.0	0.0	0.0	0.0	0.0	0.0	168.0	0.0	0.0	0.0	0.0	0.0
769ddbdc5b3772876d91cd2c82c7d3bb	0.0	101.0	35.0	31.0	0.0	0.0	0.0	0.0	0.0	0.0	0.0	0.0	0.0	0.0
5b4d690fee5d5fbaa8443fc4aaff3ea1	0.0	66.0	31.0	70.0	0.0	0.0	0.0	0.0	0.0	0.0	0.0	0.0	0.0	0.0
bb0e961b6dc40424d16c2725ab7635ca	0.0	61.0	48.0	36.0	0.0	4.0	6.0	9.0	0.0	0.0	0.0	2.0	0.0	0.0
7f827a114048d384de0b2805c1ab9264	0.0	39.0	0.0	45.0	0.0	22.0	18.0	35.0	0.0	0.0	0.0	0.0	7.0	0.0
6fca66d1a7042080792760d4d7c79a26	0.0	0.0	0.0	0.0	0.0	0.0	0.0	0.0	166.0	0.0	0.0	0.0	0.0	0.0
b696cd0944d58f6ba6140df1f6757963	0.0	76.0	44.0	45.0	0.0	0.0	0.0	0.0	0.0	0.0	0.0	0.0	0.0	0.0
7995b91bc9c1f87f3b9be95df2ab97c8	0.0	69.0	37.0	41.0	0.0	0.0	18.0	0.0	0.0	0.0	0.0	0.0	0.0	0.0
1888187b67683578abff0e0c4fad3b7e	0.0	54.0	54.0	39.0	0.0	0.0	0.0	18.0	0.0	0.0	0.0	0.0	0.0	0.0
2a286f7414e19e0f90ff9e4d9b6f3fc3	13.0	21.0	16.0	26.0	0.0	0.0	27.0	61.0	0.0	0.0	0.0	0.0	0.0	0.0
9b2cf06ccbe89ec8db84659fcc001a86	0.0	71.0	32.0	56.0	0.0	5.0	0.0	0.0	0.0	0.0	0.0	0.0	0.0	0.0
893dd394ce91af7e54887aeb9cb5108a	0.0	0.0	0.0	0.0	0.0	30.0	15.0	0.0	40.0	57.0	22.0	0.0	0.0	0.0
37b7749fa4021721e8a2189fe19e5596	0.0	0.0	0.0	0.0	0.0	0.0	87.0	77.0	0.0	0.0	0.0	0.0	0.0	0.0
d1c6bea96175d12f8e066e56c5ca3064	20.0	0.0	0.0	0.0	0.0	0.0	0.0	0.0	0.0	0.0	109.0	0.0	34.0	0.0
b551f0ebf320ea166ba7ce6ecd4bda01	0.0	72.0	53.0	38.0	0.0	0.0	0.0	0.0	0.0	0.0	0.0	0.0	0.0	0.0
6fc934428eefe754692f41331c494d72	0.0	27.0	0.0	40.0	0.0	0.0	30.0	53.0	0.0	13.0	0.0	0.0	0.0	0.0
2dc7087fc87a98349d880c5cc9b29f49	0.0	0.0	0.0	0.0	0.0	0.0	0.0	50.0	0.0	113.0	0.0	0.0	0.0	0.0
e85ed9c50db41a8727fe2964ea000712	0.0	0.0	0.0	0.0	0.0	0.0	0.0	0.0	163.0	0.0	0.0	0.0	0.0	0.0
f1e34308d952529287ada31976faec95	0.0	76.0	32.0	30.0	0.0	0.0	0.0	0.0	24.0	0.0	0.0	0.0	0.0	0.0
35697c5610e56607ae29e209bf2e5129	0.0	0.0	0.0	0.0	0.0	86.0	19.0	57.0	0.0	0.0	0.0	0.0	0.0	0.0
2f0074357586c801697a5914e6b555c4	0.0	0.0	0.0	0.0	0.0	0.0	56.0	58.0	0.0	48.0	0.0	0.0	0.0	0.0
159670de120f961b11597b22ba56ea62	0.0	103.0	0.0	58.0	0.0	0.0	0.0	0.0	0.0	0.0	0.0	0.0	0.0	0.0
b65b36ce7d1fa4d7959e051e9355a2ae	0.0	69.0	48.0	44.0	0.0	0.0	0.0	0.0	0.0	0.0	0.0	0.0	0.0	0.0
a33a0c7452e8a8f817c43d21b13d267b	0.0	0.0	0.0	0.0	0.0	0.0	87.0	74.0	0.0	0.0	0.0	0.0	0.0	0.0
5931b5afa4f691e81f9fa835539139d9	0.0	0.0	0.0	0.0	0.0	0.0	8.0	0.0	92.0	61.0	0.0	0.0	0.0	0.0
8852a04cf2a531c9372cba004c41e555	0.0	0.0	0.0	0.0	0.0	0.0	0.0	0.0	0.0	0.0	0.0	0.0	161.0	0.0
2f21f6a0ea51b2b775d21a369d467053	0.0	78.0	40.0	42.0	0.0	0.0	0.0	0.0	0.0	0.0	0.0	0.0	0.0	0.0
8b128e9b732005dae0783c6a3c918bf0	0.0	39.0	29.0	40.0	0.0	0.0	0.0	19.0	0.0	0.0	22.0	11.0	0.0	0.0
91b4504f9c474a96de6161e06fcf73b3	0.0	0.0	0.0	0.0	0.0	0.0	43.0	117.0	0.0	0.0	0.0	0.0	0.0	0.0
24cd8dccb781b543d7141b07affc0699	0.0	0.0	0.0	0.0	0.0	0.0	101.0	58.0	0.0	0.0	0.0	0.0	0.0	0.0
ad300be1f55331a5d564c0d34ff2ab76	0.0	52.0	62.0	44.0	0.0	0.0	0.0	0.0	0.0	0.0	0.0	0.0	0.0	0.0
667d5039052fca0d851cf935aa80cad6	0.0	0.0	0.0	0.0	0.0	15.0	0.0	0.0	0.0	0.0	123.0	0.0	20.0	0.0
b22ef8f2be2540217ff812e9ff613f35	0.0	0.0	0.0	0.0	0.0	0.0	158.0	0.0	0.0	0.0	0.0	0.0	0.0	0.0
bf851acc0ba6630ae1f274e5cd0c5541	10.0	0.0	0.0	3.0	0.0	34.0	0.0	6.0	0.0	0.0	37.0	35.0	32.0	0.0
265b710095b6ac9ebbf24684d221c17a	0.0	0.0	0.0	21.0	0.0	0.0	0.0	0.0	136.0	0.0	0.0	0.0	0.0	0.0
a7fa7d36718ddc71098f55070b6d6067	0.0	0.0	0.0	0.0	0.0	0.0	0.0	0.0	157.0	0.0	0.0	0.0	0.0	0.0
ea0230e129cc01c154dab9563521e212	17.0	26.0	10.0	4.0	0.0	0.0	0.0	0.0	0.0	0.0	38.0	28.0	33.0	0.0
d8fbe4b861328b4086688c42a6207072	0.0	86.0	28.0	42.0	0.0	0.0	0.0	0.0	0.0	0.0	0.0	0.0	0.0	0.0
7bb74f22aed5d0c2283c0a9fa1a44b0d	16.0	0.0	0.0	0.0	0.0	14.0	0.0	7.0	0.0	0.0	21.0	44.0	53.0	0.0
ea19f83fa48512bd3045e26137451d8d	0.0	43.0	29.0	30.0	0.0	0.0	0.0	0.0	53.0	0.0	0.0	0.0	0.0	0.0
649fa0af54a2a990ddc3198dc87d1ea1	0.0	154.0	0.0	0.0	0.0	0.0	0.0	0.0	0.0	0.0	0.0	0.0	0.0	0.0
433b134cd7b6255bd9e47973260b21ec	0.0	83.0	32.0	39.0	0.0	0.0	0.0	0.0	0.0	0.0	0.0	0.0	0.0	0.0
9299765c30bc3a5bd387ce64a24c27bc	0.0	0.0	0.0	0.0	0.0	0.0	0.0	0.0	133.0	21.0	0.0	0.0	0.0	0.0
f5fbb52340d09b53fe82a94f3c3515db	0.0	77.0	32.0	44.0	0.0	0.0	0.0	0.0	0.0	0.0	0.0	0.0	0.0	0.0
00d773da90524e1aafd3b82ecf6b2555	0.0	71.0	40.0	42.0	0.0	0.0	0.0	0.0	0.0	0.0	0.0	0.0	0.0	0.0
27627485c049ab1b0572f4a152a790e1	0.0	71.0	34.0	40.0	0.0	8.0	0.0	0.0	0.0	0.0	0.0	0.0	0.0	0.0
87160d7f67042c668822b6278a16ebe9	0.0	0.0	0.0	0.0	0.0	0.0	0.0	0.0	153.0	0.0	0.0	0.0	0.0	0.0
c8b5f9a1a90fab7daca0fe8a97e71620	16.0	67.0	31.0	38.0	0.0	0.0	0.0	0.0	0.0	0.0	0.0	0.0	0.0	0.0
13955b6048effde4b1740237eda72a0e	0.0	63.0	40.0	49.0	0.0	0.0	0.0	0.0	0.0	0.0	0.0	0.0	0.0	0.0
7ff346973a282aa55de296afdb5d74af	0.0	47.0	40.0	64.0	0.0	0.0	0.0	0.0	0.0	0.0	0.0	0.0	0.0	0.0
a267e8acf8e274fe77241955126b4fc5	0.0	33.0	36.0	22.0	0.0	15.0	45.0	0.0	0.0	0.0	0.0	0.0	0.0	0.0
2282defd621dc77b5c9904f22fe1413d	0.0	0.0	0.0	0.0	0.0	0.0	79.0	0.0	42.0	30.0	0.0	0.0	0.0	0.0
36df4df234c13c0ce7b92f148738ed39	0.0	79.0	32.0	39.0	0.0	0.0	0.0	0.0	0.0	0.0	0.0	0.0	0.0	0.0
9ca551ec35cea91fc120900ca77e9328	0.0	56.0	44.0	33.0	0.0	0.0	8.0	9.0	0.0	0.0	0.0	0.0	0.0	0.0
9d28ce90e03ce937ace5d12b29f033b6	0.0	0.0	0.0	0.0	150.0	0.0	0.0	0.0	0.0	0.0	0.0	0.0	0.0	0.0
3ddb57562ae7aaf6beb185c094eb6c6d	0.0	0.0	0.0	0.0	0.0	10.0	0.0	0.0	140.0	0.0	0.0	0.0	0.0	0.0
f2268488a4bed66be028eb0d92771cc6	0.0	0.0	0.0	0.0	0.0	0.0	0.0	0.0	66.0	84.0	0.0	0.0	0.0	0.0
6abaf4fc69e5fbd76f35e006662629a4	7.0	0.0	0.0	0.0	0.0	12.0	23.0	71.0	0.0	0.0	16.0	0.0	20.0	0.0
b78dff61d01129b13dd92d444fab5925	0.0	85.0	27.0	22.0	0.0	0.0	0.0	0.0	15.0	0.0	0.0	0.0	0.0	0.0
0be1f06a4fa1da9509f59d9b46ea33e2	0.0	0.0	0.0	0.0	149.0	0.0	0.0	0.0	0.0	0.0	0.0	0.0	0.0	0.0
2a3b4944530b261c4c344e5857f20981	29.0	27.0	0.0	0.0	0.0	21.0	0.0	0.0	0.0	0.0	41.0	0.0	30.0	0.0
aac00930695cc0561fceb2e44f1b6946	14.0	0.0	0.0	0.0	0.0	21.0	0.0	0.0	0.0	0.0	43.0	51.0	19.0	0.0
4c2b68c973746046123a559cc605a200	0.0	64.0	42.0	42.0	0.0	0.0	0.0	0.0	0.0	0.0	0.0	0.0	0.0	0.0
4bcb7e0c62886dfe7257857923a77435	0.0	59.0	21.0	27.0	0.0	0.0	0.0	0.0	41.0	0.0	0.0	0.0	0.0	0.0
25f8adaa44337205896af5a208a9be14	0.0	0.0	0.0	0.0	0.0	0.0	34.0	66.0	29.0	19.0	0.0	0.0	0.0	0.0
5766515d4dda4a41a8a4438c26b89ba5	0.0	0.0	0.0	0.0	0.0	0.0	0.0	0.0	148.0	0.0	0.0	0.0	0.0	0.0
9e5c3555df36add3450debac915c57a5	0.0	60.0	47.0	40.0	0.0	0.0	0.0	0.0	0.0	0.0	0.0	0.0	0.0	0.0
8c7e73284af4da78355fb99eb86372f4	0.0	56.0	26.0	31.0	0.0	34.0	0.0	0.0	0.0	0.0	0.0	0.0	0.0	0.0
f9fc5aea750b5f72ccbb386f46281c8b	0.0	53.0	34.0	45.0	0.0	0.0	0.0	15.0	0.0	0.0	0.0	0.0	0.0	0.0
cbacd87f1602d07851b107bf323308ea	0.0	0.0	0.0	0.0	0.0	0.0	0.0	0.0	147.0	0.0	0.0	0.0	0.0	0.0
a738568b261166a672bdd2c51055fff7	0.0	69.0	0.0	23.0	0.0	0.0	0.0	0.0	54.0	0.0	0.0	0.0	0.0	0.0
5bcd2e6effff2618091d415704254b11	0.0	69.0	34.0	27.0	0.0	16.0	0.0	0.0	0.0	0.0	0.0	0.0	0.0	0.0
4e6488dfc93f2eefe477c4511d0e8a49	0.0	0.0	0.0	0.0	0.0	0.0	0.0	0.0	146.0	0.0	0.0	0.0	0.0	0.0
315fae925226ac44af01d992c1732f74	0.0	0.0	0.0	0.0	0.0	0.0	0.0	0.0	146.0	0.0	0.0	0.0	0.0	0.0
ccb05b5f3a047857f64ca2788d1ca2d7	32.0	0.0	0.0	0.0	0.0	0.0	0.0	0.0	0.0	0.0	56.0	0.0	57.0	0.0
552be18dd6c16f1a24710b847285dfdc	0.0	0.0	0.0	0.0	0.0	27.0	84.0	0.0	0.0	0.0	34.0	0.0	0.0	0.0
be66b909830257bfc1ea6adee4f7acbe	0.0	0.0	0.0	0.0	0.0	0.0	0.0	0.0	145.0	0.0	0.0	0.0	0.0	0.0
e3e7eb7e41dd0e82763088988140aa00	0.0	66.0	35.0	43.0	0.0	0.0	0.0	0.0	0.0	0.0	0.0	0.0	0.0	0.0
baceb1980124d75c32968224afef1058	0.0	43.0	21.0	19.0	0.0	0.0	0.0	0.0	28.0	33.0	0.0	0.0	0.0	0.0
dc01240247edcdc5aacfa26854aed42d	0.0	0.0	0.0	0.0	0.0	0.0	0.0	0.0	133.0	0.0	0.0	0.0	11.0	0.0
7a3120b453e96caf1a1e47ea48aa5f72	0.0	76.0	26.0	33.0	0.0	0.0	0.0	0.0	8.0	0.0	0.0	0.0	0.0	0.0
051adce2c6b7c31058bb38596901ab6b	0.0	66.0	33.0	37.0	0.0	0.0	0.0	0.0	0.0	0.0	0.0	0.0	7.0	0.0
d63f5d03ff1389ed540917017e9f068d	0.0	0.0	0.0	0.0	0.0	0.0	0.0	0.0	143.0	0.0	0.0	0.0	0.0	0.0
4c5df690bcc9914e0758609cb79f0a81	82.0	0.0	0.0	0.0	0.0	0.0	0.0	0.0	0.0	0.0	44.0	0.0	16.0	0.0
14d05bcb6de5774c6a83affe499761f1	0.0	91.0	51.0	0.0	0.0	0.0	0.0	0.0	0.0	0.0	0.0	0.0	0.0	0.0
73f95638ad5e78c543092b62f5631caa	0.0	69.0	25.0	38.0	0.0	10.0	0.0	0.0	0.0	0.0	0.0	0.0	0.0	0.0
5005d32c590d59d6009de223e4e195fb	0.0	36.0	30.0	24.0	0.0	0.0	30.0	22.0	0.0	0.0	0.0	0.0	0.0	0.0
93387834ccf5fad68408c931a47a3e7e	0.0	0.0	0.0	0.0	142.0	0.0	0.0	0.0	0.0	0.0	0.0	0.0	0.0	0.0
08587b58a840186d4040620634a821f3	0.0	0.0	0.0	0.0	0.0	0.0	38.0	34.0	0.0	70.0	0.0	0.0	0.0	0.0
9af04068b06bb560573e49bc91309ead	0.0	0.0	0.0	0.0	0.0	0.0	0.0	0.0	142.0	0.0	0.0	0.0	0.0	0.0
9639c1757d91ce8ac64628fb1edd24c7	0.0	76.0	23.0	42.0	0.0	0.0	0.0	0.0	0.0	0.0	0.0	0.0	0.0	0.0
b0b650670a4b79fc8d1a5355364f95bf	0.0	72.0	32.0	37.0	0.0	0.0	0.0	0.0	0.0	0.0	0.0	0.0	0.0	0.0
f50b4f02eaf8bf49e7e2bf560820b581	0.0	53.0	0.0	42.0	0.0	0.0	23.0	23.0	0.0	0.0	0.0	0.0	0.0	0.0
74229ec139de24afeb51c122897715f6	0.0	0.0	0.0	0.0	0.0	0.0	0.0	0.0	132.0	9.0	0.0	0.0	0.0	0.0
2962c924b313a1159e98b69b3727ae31	0.0	0.0	0.0	0.0	0.0	0.0	0.0	0.0	87.0	54.0	0.0	0.0	0.0	0.0
1a314514be3c0bf8f80e9cbe7e4974fc	0.0	0.0	0.0	0.0	0.0	0.0	0.0	0.0	0.0	0.0	0.0	0.0	0.0	141.0
653334c36340a20181971e05d9b4e110	0.0	89.0	51.0	0.0	0.0	0.0	0.0	0.0	0.0	0.0	0.0	0.0	0.0	0.0
ed3f8d8f47258f6eba170105b4105acb	0.0	51.0	25.0	35.0	0.0	29.0	0.0	0.0	0.0	0.0	0.0	0.0	0.0	0.0
0561595e58252832c3bbdeeb1864ad7c	0.0	0.0	0.0	0.0	0.0	0.0	0.0	0.0	140.0	0.0	0.0	0.0	0.0	0.0
6a24da38d8970dc40fe54b8eed8a835a	0.0	0.0	0.0	0.0	0.0	0.0	0.0	0.0	140.0	0.0	0.0	0.0	0.0	0.0
6a7151f311b8871a509e0624837fb977	0.0	0.0	0.0	0.0	0.0	0.0	0.0	0.0	140.0	0.0	0.0	0.0	0.0	0.0
72143fd9e63fe40c1258948d2f0d79c3	25.0	0.0	0.0	0.0	0.0	0.0	0.0	0.0	0.0	0.0	41.0	34.0	39.0	0.0
457f3b3ec043520e1147d11ebf80e001	0.0	106.0	0.0	32.0	0.0	0.0	0.0	0.0	0.0	0.0	0.0	0.0	0.0	0.0
cf3c422c5a8c0c24b8116a736472ad65	0.0	82.0	56.0	0.0	0.0	0.0	0.0	0.0	0.0	0.0	0.0	0.0	0.0	0.0
2e77e058e77815bc064ecf6d1726f675	0.0	53.0	32.0	0.0	0.0	0.0	21.0	32.0	0.0	0.0	0.0	0.0	0.0	0.0
7318cb1bb15003dad2122444e79f9060	0.0	136.0	0.0	0.0	0.0	0.0	0.0	0.0	0.0	0.0	0.0	0.0	0.0	0.0
d5357fb8e1093142e018837256394d41	0.0	71.0	33.0	26.0	0.0	6.0	0.0	0.0	0.0	0.0	0.0	0.0	0.0	0.0
7415494f1acebf583211d53117eee1cc	0.0	64.0	43.0	29.0	0.0	0.0	0.0	0.0	0.0	0.0	0.0	0.0	0.0	0.0
7de837e8e528b678cf9daf8e46bd7c33	0.0	46.0	40.0	36.0	0.0	0.0	0.0	14.0	0.0	0.0	0.0	0.0	0.0	0.0
04181fa33f1ba893e1e6632e6ff778c5	0.0	0.0	0.0	0.0	0.0	0.0	0.0	0.0	136.0	0.0	0.0	0.0	0.0	0.0
8b59292c473cc561f020fdb02de7c9d1	37.0	0.0	0.0	0.0	0.0	0.0	0.0	0.0	0.0	0.0	44.0	37.0	17.0	0.0
3c72e76ad31299df28daffdf30caf87a	28.0	0.0	0.0	0.0	0.0	21.0	0.0	0.0	18.0	0.0	55.0	0.0	13.0	0.0
538af1474c71b7eae335771f5477df32	0.0	72.0	38.0	25.0	0.0	0.0	0.0	0.0	0.0	0.0	0.0	0.0	0.0	0.0
8cb0b33e40d90f7d0e56f10e56f43c53	0.0	43.0	34.0	50.0	0.0	0.0	0.0	8.0	0.0	0.0	0.0	0.0	0.0	0.0
1a33df6b2a324704a246b754002fc774	0.0	21.0	16.0	25.0	0.0	0.0	33.0	40.0	0.0	0.0	0.0	0.0	0.0	0.0
f5c1b0454aa31d567877d74dd786d3ba	0.0	0.0	0.0	0.0	0.0	0.0	0.0	0.0	135.0	0.0	0.0	0.0	0.0	0.0
0bbdf40a72d2d0ef0213610f9fc17203	0.0	81.0	0.0	0.0	0.0	0.0	0.0	0.0	53.0	0.0	0.0	0.0	0.0	0.0
20ecaf6550b196f2521224bee2139041	0.0	68.0	23.0	26.0	0.0	17.0	0.0	0.0	0.0	0.0	0.0	0.0	0.0	0.0
2ce6c52a5ad1eda3c242d4d5538b8de0	0.0	0.0	0.0	0.0	0.0	0.0	0.0	0.0	134.0	0.0	0.0	0.0	0.0	0.0
0b58099b9e3078580ad1e7d19520c247	0.0	64.0	21.0	37.0	0.0	0.0	0.0	0.0	0.0	11.0	0.0	0.0	0.0	0.0
5d324ba2a6460de903662ef6460eca18	0.0	56.0	42.0	35.0	0.0	0.0	0.0	0.0	0.0	0.0	0.0	0.0	0.0	0.0
cd595c4d4718f235de7afa8a4fb1d827	0.0	0.0	73.0	60.0	0.0	0.0	0.0	0.0	0.0	0.0	0.0	0.0	0.0	0.0
71980433dfb22eb6c2526855a7837f98	0.0	71.0	37.0	24.0	0.0	0.0	0.0	0.0	0.0	0.0	0.0	0.0	0.0	0.0
24e6649cb9c1714d481670d3c9bff7f6	0.0	0.0	0.0	0.0	0.0	0.0	124.0	0.0	0.0	8.0	0.0	0.0	0.0	0.0
9a2a437c19b15de632b0e3c7432cdc35	34.0	0.0	0.0	0.0	0.0	0.0	0.0	0.0	0.0	0.0	60.0	0.0	37.0	0.0
fa96cbd7b2df953f48e159b78c51527d	0.0	57.0	0.0	32.0	0.0	21.0	0.0	0.0	0.0	21.0	0.0	0.0	0.0	0.0
56335ac95e507e0bbb08dc360850bfe5	0.0	53.0	44.0	0.0	0.0	34.0	0.0	0.0	0.0	0.0	0.0	0.0	0.0	0.0
31246acf119a49914ae2da8d60cf726c	0.0	52.0	46.0	33.0	0.0	0.0	0.0	0.0	0.0	0.0	0.0	0.0	0.0	0.0
a269e67aadf451e3fc9b2bdcec1c47ce	0.0	45.0	22.0	29.0	0.0	0.0	7.0	10.0	10.0	8.0	0.0	0.0	0.0	0.0
c10b39469f5596ecbe5292fbaa5f5b88	0.0	54.0	30.0	46.0	0.0	0.0	0.0	0.0	0.0	0.0	0.0	0.0	0.0	0.0
b99548c1eb038812aa57aa185ff2a7ab	0.0	43.0	0.0	0.0	0.0	0.0	60.0	27.0	0.0	0.0	0.0	0.0	0.0	0.0
f45b0acae8bf4d11677e14884390e975	0.0	0.0	0.0	0.0	0.0	0.0	47.0	83.0	0.0	0.0	0.0	0.0	0.0	0.0
7b035b5315755ebcad98d3bfa3928f56	0.0	0.0	0.0	0.0	0.0	0.0	0.0	0.0	0.0	0.0	36.0	26.0	68.0	0.0
881fb5ce578639cae59db7ce9acb6095	0.0	104.0	10.0	15.0	0.0	0.0	0.0	0.0	0.0	0.0	0.0	0.0	0.0	0.0
838f9b15d03dbd6dc65050aac63dd8d0	0.0	0.0	0.0	0.0	0.0	66.0	0.0	0.0	0.0	63.0	0.0	0.0	0.0	0.0
8cd9b064a6cc9526fe836c8c4f6a7c05	0.0	0.0	0.0	0.0	0.0	25.0	0.0	0.0	104.0	0.0	0.0	0.0	0.0	0.0
085cae7bbb63b0fa24f9e4cd9419255b	0.0	0.0	0.0	0.0	0.0	0.0	9.0	63.0	57.0	0.0	0.0	0.0	0.0	0.0
cc6bb642e1ae30ce746a9a72b0fd93f0	0.0	0.0	0.0	0.0	0.0	0.0	0.0	0.0	129.0	0.0	0.0	0.0	0.0	0.0
e9eec47c118871031ea72780484a263f	0.0	0.0	0.0	0.0	0.0	0.0	0.0	0.0	129.0	0.0	0.0	0.0	0.0	0.0
d295e63bf67d549419055c6c0aa8f609	0.0	0.0	0.0	0.0	0.0	0.0	0.0	0.0	129.0	0.0	0.0	0.0	0.0	0.0
07577ac2f00edd30d4a945d21a834d49	0.0	0.0	0.0	0.0	0.0	0.0	0.0	0.0	0.0	0.0	111.0	18.0	0.0	0.0
593954f80633edf4a8e1063d72153532	0.0	72.0	25.0	31.0	0.0	0.0	0.0	0.0	0.0	0.0	0.0	0.0	0.0	0.0
c3b0a40b05cc2274646998eaf7a87ced	0.0	65.0	35.0	28.0	0.0	0.0	0.0	0.0	0.0	0.0	0.0	0.0	0.0	0.0
a736bf8aab84f65b0a7e2cb20966b40f	0.0	41.0	19.0	28.0	0.0	13.0	8.0	0.0	0.0	16.0	3.0	0.0	0.0	0.0
8471dd8e0adf8dd9b11ce7621747787b	0.0	37.0	0.0	45.0	0.0	46.0	0.0	0.0	0.0	0.0	0.0	0.0	0.0	0.0
4702f64292a29e3aa05ae165eced98e7	0.0	32.0	32.0	27.0	0.0	0.0	0.0	0.0	0.0	0.0	37.0	0.0	0.0	0.0
ca4c47b3c0e9c70c308c63c2cafa8e70	13.0	0.0	3.0	0.0	0.0	23.0	9.0	0.0	8.0	3.0	38.0	14.0	16.0	0.0
0b0fdb5262a0f096a9447105cf77fe08	0.0	58.0	33.0	36.0	0.0	0.0	0.0	0.0	0.0	0.0	0.0	0.0	0.0	0.0
d09764ebeef6e9fe64066c1a38994f4e	0.0	44.0	37.0	46.0	0.0	0.0	0.0	0.0	0.0	0.0	0.0	0.0	0.0	0.0
745554da644bf2e85889a1708cb3cf0c	14.0	15.0	6.0	0.0	0.0	23.0	0.0	0.0	0.0	0.0	11.0	0.0	57.0	0.0
768dc8d63f66ad4cf87ed3c3db0d0d9d	0.0	55.0	36.0	35.0	0.0	0.0	0.0	0.0	0.0	0.0	0.0	0.0	0.0	0.0
ca8743ed82235767ff72833de0d48a40	0.0	38.0	0.0	0.0	0.0	0.0	0.0	0.0	0.0	88.0	0.0	0.0	0.0	0.0
b3ce7bc8e93672ace5f4afc92187f7d4	0.0	0.0	0.0	0.0	0.0	48.0	0.0	0.0	0.0	78.0	0.0	0.0	0.0	0.0
5ee51f6a330fe50e259fc2cb3ddc5832	0.0	0.0	0.0	0.0	0.0	0.0	0.0	0.0	107.0	11.0	8.0	0.0	0.0	0.0
a42f6e855ccfccaea1b042a7618b3957	0.0	84.0	0.0	41.0	0.0	0.0	0.0	0.0	0.0	0.0	0.0	0.0	0.0	0.0
bac5fc2fd0e02503618acd2070f44c68	0.0	69.0	41.0	0.0	0.0	0.0	0.0	0.0	0.0	15.0	0.0	0.0	0.0	0.0
bca82bc447bbd86d4a6a93e596e3aabd	0.0	55.0	29.0	36.0	0.0	5.0	0.0	0.0	0.0	0.0	0.0	0.0	0.0	0.0
1a30e774916b909390ea4d931a009ba2	0.0	32.0	15.0	17.0	0.0	0.0	0.0	0.0	61.0	0.0	0.0	0.0	0.0	0.0
1de8c52f52773dd008485284722e4334	0.0	0.0	6.0	0.0	0.0	0.0	12.0	31.0	44.0	32.0	0.0	0.0	0.0	0.0
e8a2bd558eaea71b831812118c6292c0	0.0	0.0	0.0	0.0	0.0	0.0	53.0	68.0	0.0	0.0	4.0	0.0	0.0	0.0
7e19e120b2229b6e1b4a65cf2c8d929a	0.0	0.0	0.0	0.0	0.0	0.0	0.0	0.0	125.0	0.0	0.0	0.0	0.0	0.0
b160e34e023b3320ed3e7857cd9a278a	0.0	0.0	0.0	0.0	0.0	0.0	0.0	0.0	113.0	12.0	0.0	0.0	0.0	0.0
5d39eb337383cf1bef10192bc4cbfe99	0.0	61.0	36.0	27.0	0.0	0.0	0.0	0.0	0.0	0.0	0.0	0.0	0.0	0.0
ab663727e72b91937c7cd9771db9fae6	0.0	0.0	0.0	0.0	0.0	0.0	0.0	0.0	124.0	0.0	0.0	0.0	0.0	0.0
79029fa983ec4eda60117a273a52cfc0	0.0	33.0	42.0	30.0	0.0	0.0	0.0	0.0	0.0	18.0	0.0	0.0	0.0	0.0
ebb55f5b7e1873926e89ecc64280ba00	0.0	18.0	0.0	10.0	0.0	0.0	16.0	24.0	13.0	42.0	0.0	0.0	0.0	0.0
aa1cb1c1a567aea620272a9907ed1cc1	0.0	0.0	0.0	0.0	0.0	56.0	0.0	0.0	0.0	67.0	0.0	0.0	0.0	0.0
8713bd14c097891b0c900a0e78dec5d2	0.0	0.0	0.0	0.0	0.0	0.0	0.0	0.0	123.0	0.0	0.0	0.0	0.0	0.0
9e50c96026de909e7e115e3c1b150515	0.0	0.0	0.0	0.0	0.0	0.0	0.0	0.0	123.0	0.0	0.0	0.0	0.0	0.0
6e6f306a337ba255a7f4a7f8469ff691	0.0	54.0	26.0	0.0	42.0	0.0	0.0	0.0	0.0	0.0	0.0	0.0	0.0	0.0
ac5ea54be12efa1b3206db6b2bf37a71	0.0	40.0	21.0	19.0	0.0	0.0	17.0	18.0	7.0	0.0	0.0	0.0	0.0	0.0
997e6a2a86e0c0af0bd6f50e2dea916f	7.0	52.0	0.0	33.0	0.0	0.0	0.0	19.0	0.0	0.0	0.0	0.0	10.0	0.0
6c3fb343f46983254cdb83e99fa07a49	0.0	88.0	0.0	33.0	0.0	0.0	0.0	0.0	0.0	0.0	0.0	0.0	0.0	0.0
834408b5dea275ad6ac778a97c1414cb	0.0	43.0	18.0	20.0	0.0	7.0	0.0	0.0	33.0	0.0	0.0	0.0	0.0	0.0
c4f7f7d843eca4862537b5052067f2bb	0.0	0.0	0.0	0.0	121.0	0.0	0.0	0.0	0.0	0.0	0.0	0.0	0.0	0.0
e615a60e6317b1b3c479a8a1e6642e4f	0.0	79.0	41.0	0.0	0.0	0.0	0.0	0.0	0.0	0.0	0.0	0.0	0.0	0.0
f07e21e90e145b767a666b1e72d98baf	0.0	61.0	31.0	28.0	0.0	0.0	0.0	0.0	0.0	0.0	0.0	0.0	0.0	0.0
b8cc687162c925fe9d5e4b6662539fdc	0.0	0.0	6.0	0.0	0.0	114.0	0.0	0.0	0.0	0.0	0.0	0.0	0.0	0.0
b4904f0439808df27ecca12b392aafe1	8.0	0.0	29.0	0.0	0.0	0.0	36.0	46.0	0.0	0.0	0.0	0.0	0.0	0.0
d992cc4ebb63a6c108e6f854519e2136	0.0	79.0	40.0	0.0	0.0	0.0	0.0	0.0	0.0	0.0	0.0	0.0	0.0	0.0
31b6359dcd019b1bf1162aa1dc33ea92	0.0	56.0	30.0	33.0	0.0	0.0	0.0	0.0	0.0	0.0	0.0	0.0	0.0	0.0
c4c2bbfdb13e34385138dc259abf9a1f	0.0	50.0	33.0	36.0	0.0	0.0	0.0	0.0	0.0	0.0	0.0	0.0	0.0	0.0
067037be8632291041fbc38dd3ff299f	0.0	45.0	32.0	41.0	0.0	0.0	0.0	0.0	0.0	0.0	0.0	0.0	0.0	0.0
160ce4cc2ef58aa108bf8e0a53b6f570	0.0	0.0	0.0	0.0	0.0	37.0	5.0	0.0	30.0	46.0	0.0	0.0	0.0	0.0
9b8f0e9ad16bb718f2c439b54ead1fab	0.0	0.0	0.0	0.0	0.0	0.0	0.0	0.0	47.0	71.0	0.0	0.0	0.0	0.0
687900f8234b7263e43907dbb7cfdd88	68.0	0.0	0.0	0.0	0.0	0.0	0.0	0.0	0.0	0.0	49.0	0.0	0.0	0.0
ed34818da58ad5cb07e025c0f73b04ab	28.0	22.0	0.0	13.0	0.0	39.0	6.0	0.0	0.0	0.0	0.0	0.0	9.0	0.0
cb7c3f786c3d69022d6b723160f4b239	0.0	77.0	0.0	40.0	0.0	0.0	0.0	0.0	0.0	0.0	0.0	0.0	0.0	0.0
44f53549eb46b84f99167f9f0b2e8440	0.0	53.0	31.0	33.0	0.0	0.0	0.0	0.0	0.0	0.0	0.0	0.0	0.0	0.0
7ab75068242191485a906ed169cd117c	0.0	36.0	26.0	55.0	0.0	0.0	0.0	0.0	0.0	0.0	0.0	0.0	0.0	0.0
df3ad930204fb9ff1b4bef81bfb98d0f	0.0	0.0	0.0	0.0	0.0	11.0	0.0	0.0	106.0	0.0	0.0	0.0	0.0	0.0
316ab9a69727b4c5940cb547baacc25a	0.0	90.0	0.0	0.0	0.0	0.0	0.0	0.0	26.0	0.0	0.0	0.0	0.0	0.0
00c833ccf6bfa9076f0cbf89441c0f88	0.0	65.0	26.0	25.0	0.0	0.0	0.0	0.0	0.0	0.0	0.0	0.0	0.0	0.0
6a5d78b96703c885c911817baa9be2f5	24.0	17.0	8.0	17.0	0.0	41.0	0.0	0.0	0.0	0.0	0.0	0.0	8.0	0.0
a2f776918cbb1365a99740554bd10142	11.0	19.0	13.0	0.0	0.0	0.0	40.0	0.0	0.0	0.0	18.0	0.0	14.0	0.0
afdc4eeab8598f5bfecfff88328c0009	0.0	57.0	30.0	28.0	0.0	0.0	0.0	0.0	0.0	0.0	0.0	0.0	0.0	0.0
0c1a390eee30ee084721a7f220b3792a	0.0	56.0	28.0	31.0	0.0	0.0	0.0	0.0	0.0	0.0	0.0	0.0	0.0	0.0
fcc092d3c156f4855964e539266a0ccd	0.0	55.0	42.0	0.0	0.0	0.0	0.0	0.0	0.0	0.0	18.0	0.0	0.0	0.0
be999fe9d6788b32c7bb7a4267908f2d	0.0	51.0	31.0	33.0	0.0	0.0	0.0	0.0	0.0	0.0	0.0	0.0	0.0	0.0
bcd53bcc70b51bb73378601e6fdba3bc	0.0	29.0	0.0	13.0	0.0	22.0	20.0	26.0	0.0	0.0	0.0	0.0	5.0	0.0
67694546dbbdd9eb31e9772f1ce50fdf	0.0	27.0	17.0	21.0	0.0	0.0	33.0	17.0	0.0	0.0	0.0	0.0	0.0	0.0
a5002d4f78f6246f733ccf1e79535bbc	7.0	53.0	27.0	25.0	0.0	2.0	0.0	0.0	0.0	0.0	0.0	0.0	0.0	0.0
655724c09214381456a8d7d80dae06a5	0.0	64.0	50.0	0.0	0.0	0.0	0.0	0.0	0.0	0.0	0.0	0.0	0.0	0.0
8d6ab43ca565b63dcd67eb08a0df9f8a	0.0	57.0	26.0	31.0	0.0	0.0	0.0	0.0	0.0	0.0	0.0	0.0	0.0	0.0
cb005570d96fb64291458fdecbdceb53	0.0	14.0	13.0	12.0	0.0	0.0	0.0	20.0	23.0	32.0	0.0	0.0	0.0	0.0
bf22db47913a3eef9827e30344eb634b	0.0	12.0	7.0	8.0	0.0	0.0	0.0	10.0	16.0	61.0	0.0	0.0	0.0	0.0
f79937d199dd2a193b6f0d763fab652e	0.0	11.0	0.0	0.0	0.0	0.0	0.0	0.0	103.0	0.0	0.0	0.0	0.0	0.0
ffaaeeedff2c0260533887d9b88a3393	0.0	70.0	0.0	0.0	0.0	0.0	0.0	0.0	43.0	0.0	0.0	0.0	0.0	0.0
e675a31f9c2c84dc0ded8ac54c3076be	0.0	0.0	0.0	48.0	0.0	0.0	0.0	0.0	65.0	0.0	0.0	0.0	0.0	0.0
82103bdfc72fabd660964614818b6b3b	0.0	0.0	0.0	0.0	0.0	0.0	0.0	113.0	0.0	0.0	0.0	0.0	0.0	0.0
8d721866d49ab2f45678c63eb425b4b2	0.0	0.0	0.0	0.0	0.0	0.0	0.0	113.0	0.0	0.0	0.0	0.0	0.0	0.0
b5203ea716509b2a7a9b8b9f70875eb6	0.0	0.0	0.0	0.0	0.0	0.0	0.0	0.0	113.0	0.0	0.0	0.0	0.0	0.0
5a37f59051d37c8d138f2dcd1b6a95dd	40.0	10.0	9.0	0.0	0.0	0.0	0.0	0.0	0.0	0.0	23.0	11.0	19.0	0.0
bdc6b2e04197cd0807b9642cb29259df	0.0	0.0	0.0	0.0	0.0	0.0	22.0	38.0	52.0	0.0	0.0	0.0	0.0	0.0
095d8cb89ebb7ffa004ba2a7bc292d25	0.0	0.0	0.0	0.0	0.0	0.0	0.0	23.0	43.0	46.0	0.0	0.0	0.0	0.0
e645157a8c79181c5ac478ffc3a3e975	0.0	0.0	0.0	0.0	0.0	0.0	0.0	0.0	112.0	0.0	0.0	0.0	0.0	0.0
feceba4a638be31ee4b7e03b883a9305	18.0	0.0	0.0	0.0	0.0	0.0	0.0	0.0	0.0	0.0	30.0	34.0	29.0	0.0
6bd477ff9220d2398e13bf66a5d284a5	0.0	47.0	18.0	23.0	0.0	0.0	10.0	10.0	0.0	3.0	0.0	0.0	0.0	0.0
95684b8a95690b0242ad9dbdaed85565	0.0	45.0	22.0	26.0	0.0	0.0	0.0	18.0	0.0	0.0	0.0	0.0	0.0	0.0
098fa90d9ac4bf30d6eeb7a19862197a	0.0	43.0	0.0	19.0	0.0	0.0	0.0	0.0	49.0	0.0	0.0	0.0	0.0	0.0
8bfbc7b6121f050e5781b87c6518bfac	0.0	24.0	18.0	22.0	0.0	0.0	24.0	23.0	0.0	0.0	0.0	0.0	0.0	0.0
e1c0e69b9f2d7db1ca7d688fb58d7cbc	0.0	46.0	28.0	36.0	0.0	0.0	0.0	0.0	0.0	0.0	0.0	0.0	0.0	0.0
f91201adfe8be6ff17177daa8bb13518	0.0	36.0	20.0	9.0	0.0	0.0	22.0	11.0	12.0	0.0	0.0	0.0	0.0	0.0
13b2f7f357ef51c659e6d54f75b69875	0.0	0.0	0.0	0.0	0.0	0.0	107.0	3.0	0.0	0.0	0.0	0.0	0.0	0.0
0e542bd2e9ce9817fb1d6fdcf877c98d	0.0	0.0	0.0	0.0	0.0	0.0	0.0	20.0	90.0	0.0	0.0	0.0	0.0	0.0
8f813280e8cc1c972cdf97b409fa6840	0.0	0.0	0.0	0.0	0.0	0.0	0.0	0.0	0.0	110.0	0.0	0.0	0.0	0.0
6f59f012689127a6ae40cdd12a948bcf	29.0	27.0	12.0	17.0	0.0	0.0	0.0	0.0	7.0	0.0	17.0	0.0	0.0	0.0
92c0c75c6858840cbc21744f047e2a02	0.0	26.0	26.0	30.0	0.0	0.0	0.0	0.0	13.0	14.0	0.0	0.0	0.0	0.0
e0c04f98628180fd510b9eafb997c987	0.0	0.0	0.0	0.0	0.0	0.0	0.0	0.0	0.0	0.0	0.0	69.0	40.0	0.0
e35724d90c6dbc5e1acae2e4d089dcf6	0.0	51.0	19.0	38.0	0.0	0.0	0.0	0.0	0.0	0.0	0.0	0.0	0.0	0.0
011f6bf791d4b3e83d9f5fd56acc2bd7	0.0	49.0	33.0	24.0	0.0	0.0	0.0	0.0	0.0	0.0	0.0	0.0	2.0	0.0
0629538213ca0e490c4845c4fd3bf1d1	0.0	39.0	36.0	33.0	0.0	0.0	0.0	0.0	0.0	0.0	0.0	0.0	0.0	0.0
d8ffd8801d7054d494cb69851ad23cf1	0.0	27.0	0.0	0.0	0.0	0.0	20.0	17.0	14.0	30.0	0.0	0.0	0.0	0.0
6a869f95f9b2a5c4a169a657dde9591d	0.0	0.0	0.0	0.0	0.0	108.0	0.0	0.0	0.0	0.0	0.0	0.0	0.0	0.0
fffed806c039778551e927d8b0579f48	0.0	0.0	0.0	0.0	0.0	0.0	0.0	0.0	108.0	0.0	0.0	0.0	0.0	0.0
af05c3908f356220a67a327d63372cae	0.0	0.0	0.0	0.0	0.0	0.0	0.0	0.0	108.0	0.0	0.0	0.0	0.0	0.0
29fe824f25e7d5e9feecea8e4ae57736	0.0	53.0	0.0	0.0	0.0	0.0	0.0	0.0	54.0	0.0	0.0	0.0	0.0	0.0
b3ab9de04f409a89e694d048cf3e3c9d	0.0	43.0	28.0	36.0	0.0	0.0	0.0	0.0	0.0	0.0	0.0	0.0	0.0	0.0
7dd385c7897ede8476320623e5456d5e	0.0	33.0	26.0	48.0	0.0	0.0	0.0	0.0	0.0	0.0	0.0	0.0	0.0	0.0
6112d362565c5797eb555106a550d353	0.0	0.0	0.0	0.0	107.0	0.0	0.0	0.0	0.0	0.0	0.0	0.0	0.0	0.0
bc744d60a4606acc8244944a85cd8606	0.0	61.0	45.0	0.0	0.0	0.0	0.0	0.0	0.0	0.0	0.0	0.0	0.0	0.0
2ac7bf01e36a275807caeeb5b9b998e3	0.0	46.0	30.0	30.0	0.0	0.0	0.0	0.0	0.0	0.0	0.0	0.0	0.0	0.0
89c4c5564a288c9db2bba9c0fb8beae9	0.0	0.0	0.0	23.0	0.0	0.0	44.0	39.0	0.0	0.0	0.0	0.0	0.0	0.0
04bda614501535862dc075997aa31ccd	0.0	0.0	0.0	0.0	0.0	28.0	0.0	0.0	0.0	0.0	0.0	0.0	78.0	0.0
2bfdde275966e8b523b8c3c2ef874413	0.0	0.0	0.0	0.0	0.0	0.0	0.0	7.0	57.0	42.0	0.0	0.0	0.0	0.0
681c1740d5917dc84caacdd55ece7ca2	0.0	0.0	0.0	0.0	105.0	0.0	0.0	0.0	0.0	0.0	0.0	0.0	0.0	0.0
75df0a17441b55a6d24452d0cdd7e5e1	0.0	0.0	0.0	0.0	105.0	0.0	0.0	0.0	0.0	0.0	0.0	0.0	0.0	0.0
7b7595f9b76cf1c37a9b7943d54f75c2	0.0	0.0	0.0	0.0	0.0	0.0	0.0	53.0	52.0	0.0	0.0	0.0	0.0	0.0
d0727300556498cf399ed305d0558349	0.0	0.0	0.0	0.0	0.0	0.0	0.0	0.0	105.0	0.0	0.0	0.0	0.0	0.0
d7467f78ef9e51cb5912a49635033df1	0.0	0.0	0.0	0.0	0.0	0.0	0.0	0.0	37.0	68.0	0.0	0.0	0.0	0.0
b36023fc56449cdd4e744a34b01598f8	0.0	0.0	0.0	0.0	0.0	0.0	0.0	0.0	0.0	0.0	82.0	23.0	0.0	0.0
4b5648c8630f90b170d9e716829ec119	0.0	45.0	24.0	0.0	0.0	0.0	0.0	0.0	27.0	8.0	0.0	0.0	0.0	0.0
243dcd8a51535c43d71a74c858b555a7	0.0	38.0	39.0	27.0	0.0	0.0	0.0	0.0	0.0	0.0	0.0	0.0	0.0	0.0
565f215f8267ea06b8cb664483dfccfb	0.0	26.0	9.0	0.0	0.0	0.0	13.0	0.0	0.0	0.0	16.0	22.0	18.0	0.0
ae8fba04ac4db9fc31a26b07b0f21a18	0.0	0.0	0.0	0.0	0.0	12.0	0.0	0.0	8.0	14.0	16.0	0.0	54.0	0.0
82019e955e3bd14d0840e4fb2380a39b	0.0	0.0	0.0	0.0	0.0	0.0	12.0	0.0	22.0	0.0	38.0	0.0	32.0	0.0
6e0546931ed7eab1f41201aabb92be68	0.0	0.0	0.0	0.0	0.0	0.0	0.0	0.0	104.0	0.0	0.0	0.0	0.0	0.0
c35a6b2972c0b43c6d587fb0018a0a66	0.0	0.0	0.0	0.0	0.0	0.0	0.0	0.0	104.0	0.0	0.0	0.0	0.0	0.0
0705282471fdf5b0697d3f3f1b28c818	0.0	44.0	25.0	32.0	0.0	2.0	0.0	0.0	0.0	0.0	0.0	0.0	0.0	0.0
fd5786c34fcd869feecb36f039662457	0.0	0.0	0.0	0.0	0.0	0.0	0.0	0.0	103.0	0.0	0.0	0.0	0.0	0.0
ef08764cb030535660449e8c92b6e1a6	0.0	0.0	0.0	0.0	0.0	0.0	0.0	0.0	103.0	0.0	0.0	0.0	0.0	0.0
7bdf6699818be9b4b699c90dd7ce60fa	0.0	79.0	23.0	0.0	0.0	0.0	0.0	0.0	0.0	0.0	0.0	0.0	0.0	0.0
7c6fc760f57fcf70f9f5c01491cba6d3	0.0	76.0	0.0	0.0	0.0	0.0	0.0	0.0	26.0	0.0	0.0	0.0	0.0	0.0
6b584cc62950edf18667d3ed911d2bfd	0.0	63.0	0.0	0.0	0.0	0.0	0.0	0.0	39.0	0.0	0.0	0.0	0.0	0.0
8c64f0527fa281dc9d8655f753ae4f1a	0.0	24.0	23.0	20.0	0.0	0.0	0.0	0.0	35.0	0.0	0.0	0.0	0.0	0.0
19bd91e8011010e55c1b7885079daab8	0.0	0.0	0.0	0.0	0.0	0.0	0.0	0.0	102.0	0.0	0.0	0.0	0.0	0.0
55c85a40ca1205f25c14d46631b2b7b9	0.0	0.0	0.0	0.0	0.0	0.0	0.0	0.0	101.0	0.0	0.0	0.0	0.0	0.0
07679753a440ed50dc40f7a672484257	0.0	0.0	0.0	0.0	0.0	0.0	0.0	0.0	101.0	0.0	0.0	0.0	0.0	0.0
7abac5763f12322fd437941fc0842a98	0.0	0.0	0.0	0.0	0.0	0.0	0.0	0.0	0.0	0.0	101.0	0.0	0.0	0.0
a8ae107ea5a7173460ef5f4ce01d40a3	0.0	0.0	0.0	0.0	0.0	0.0	0.0	0.0	0.0	0.0	20.0	28.0	53.0	0.0
8c09c10417344faba7f62d7b0e30656a	41.0	0.0	0.0	0.0	0.0	0.0	0.0	0.0	0.0	0.0	23.0	10.0	26.0	0.0
d0cd696a7c6b9b768710befb3dd5f511	0.0	23.0	0.0	16.0	0.0	0.0	19.0	42.0	0.0	0.0	0.0	0.0	0.0	0.0
77aea3ba8a5c4e5ed86e8201d57e0b11	0.0	0.0	0.0	0.0	0.0	0.0	5.0	33.0	24.0	38.0	0.0	0.0	0.0	0.0
518f3dedbe081d948055f9483b6947bc	0.0	0.0	0.0	0.0	0.0	0.0	0.0	0.0	90.0	10.0	0.0	0.0	0.0	0.0
8ff4d64b57d15523b1e0d4727e6ca107	0.0	49.0	20.0	30.0	0.0	0.0	0.0	0.0	0.0	0.0	0.0	0.0	0.0	0.0
17d8fa66eda2c2e41b17f4dc31939958	0.0	44.0	28.0	27.0	0.0	0.0	0.0	0.0	0.0	0.0	0.0	0.0	0.0	0.0
4379fd2009ced9128218c7fa7cdbdda4	0.0	0.0	0.0	0.0	0.0	0.0	0.0	13.0	61.0	25.0	0.0	0.0	0.0	0.0
35f245c1bd802d7b4c23ba7637d38188	0.0	0.0	0.0	0.0	0.0	0.0	0.0	0.0	99.0	0.0	0.0	0.0	0.0	0.0
6ef0ba7972a3d850ab53b4cff1ecc30a	0.0	0.0	0.0	0.0	0.0	0.0	0.0	0.0	0.0	0.0	36.0	34.0	29.0	0.0
92cdfe8ee0b28a6b0d066f1746ab5904	0.0	49.0	0.0	49.0	0.0	0.0	0.0	0.0	0.0	0.0	0.0	0.0	0.0	0.0
bc01b55cbd45e2182405976fb820530f	0.0	41.0	36.0	21.0	0.0	0.0	0.0	0.0	0.0	0.0	0.0	0.0	0.0	0.0
a8750c0839fd0a0af5fde85a6a3d9bfb	0.0	37.0	42.0	19.0	0.0	0.0	0.0	0.0	0.0	0.0	0.0	0.0	0.0	0.0
98f579859fb98a4b2e66d6d492f31fc0	0.0	32.0	0.0	28.0	0.0	0.0	0.0	0.0	38.0	0.0	0.0	0.0	0.0	0.0
38e5384f99ad54a69564ac226c7635c7	0.0	0.0	0.0	98.0	0.0	0.0	0.0	0.0	0.0	0.0	0.0	0.0	0.0	0.0
b8068dace33889eaf4022e0df5427d48	0.0	0.0	0.0	0.0	0.0	0.0	50.0	48.0	0.0	0.0	0.0	0.0	0.0	0.0
29d77e05dea600d020b0254818e1853c	0.0	0.0	0.0	0.0	0.0	0.0	0.0	0.0	98.0	0.0	0.0	0.0	0.0	0.0
5333523b7897eab6203fcb74a1fa8161	0.0	54.0	0.0	43.0	0.0	0.0	0.0	0.0	0.0	0.0	0.0	0.0	0.0	0.0
c1ffec3e68d94c905a648e7664c2d2b3	0.0	29.0	28.0	0.0	0.0	0.0	0.0	0.0	40.0	0.0	0.0	0.0	0.0	0.0
90928be15bfdfac7a5ec59ed2bc88969	0.0	24.0	19.0	11.0	0.0	0.0	16.0	16.0	0.0	11.0	0.0	0.0	0.0	0.0
c37a055679f34a9960a546e8cacf7ba8	0.0	0.0	0.0	0.0	0.0	0.0	0.0	0.0	71.0	26.0	0.0	0.0	0.0	0.0
9d30737a9207c5b11e6993bed6886664	0.0	43.0	24.0	0.0	0.0	0.0	0.0	0.0	0.0	0.0	0.0	29.0	0.0	0.0
c5958508a54927091e736d69e183b4da	0.0	32.0	21.0	22.0	0.0	0.0	0.0	0.0	0.0	0.0	14.0	3.0	4.0	0.0
8ca738a2c88322a5e42c580681ea2c1a	0.0	0.0	0.0	0.0	0.0	0.0	0.0	0.0	96.0	0.0	0.0	0.0	0.0	0.0
7e35ae3ce923de037ae0b4da9db3734f	0.0	48.0	17.0	30.0	0.0	0.0	0.0	0.0	0.0	0.0	0.0	0.0	0.0	0.0
305fdec60d940fa988d4065cbeebf0ca	0.0	18.0	0.0	19.0	0.0	43.0	0.0	0.0	0.0	0.0	10.0	5.0	0.0	0.0
fbf6c6b62a1c9011fd23898ba29bcd14	0.0	0.0	0.0	0.0	95.0	0.0	0.0	0.0	0.0	0.0	0.0	0.0	0.0	0.0
146cc55676f9d0cbe3db888ab82cb662	0.0	0.0	0.0	0.0	0.0	17.0	0.0	0.0	78.0	0.0	0.0	0.0	0.0	0.0
06286452eaf199dd999b205442c434b4	0.0	46.0	0.0	42.0	0.0	0.0	0.0	0.0	0.0	0.0	0.0	6.0	0.0	0.0
8105a6d84aacf46dc7a75f31acbe2580	0.0	37.0	26.0	31.0	0.0	0.0	0.0	0.0	0.0	0.0	0.0	0.0	0.0	0.0
cd6ef2ccd49a082fd0bcbe311e0bb4f0	0.0	0.0	0.0	0.0	94.0	0.0	0.0	0.0	0.0	0.0	0.0	0.0	0.0	0.0
3a3b46147dcbdbe09e348f31da514a32	0.0	0.0	0.0	0.0	0.0	0.0	0.0	0.0	94.0	0.0	0.0	0.0	0.0	0.0
8be0a5fa2a4fe52c974010fa4251e19e	0.0	93.0	0.0	0.0	0.0	0.0	0.0	0.0	0.0	0.0	0.0	0.0	0.0	0.0
28c3ed626715510b7ddfdb86f3016744	0.0	52.0	25.0	0.0	0.0	16.0	0.0	0.0	0.0	0.0	0.0	0.0	0.0	0.0
d4af31f8aa4fd3496869159c09b5d3f3	0.0	17.0	18.0	18.0	0.0	0.0	0.0	0.0	0.0	0.0	21.0	0.0	19.0	0.0
96b439ae50caea8d09730c28a828efc6	0.0	0.0	0.0	0.0	0.0	0.0	0.0	20.0	73.0	0.0	0.0	0.0	0.0	0.0
297350d398d9b3e0f80db94f56bc7c62	0.0	0.0	0.0	0.0	0.0	0.0	0.0	0.0	93.0	0.0	0.0	0.0	0.0	0.0
2f0b5f67958497c0c8c17550513d4cef	0.0	62.0	30.0	0.0	0.0	0.0	0.0	0.0	0.0	0.0	0.0	0.0	0.0	0.0
f239a190b75e3249a236b82b45858f2d	0.0	40.0	21.0	19.0	0.0	0.0	0.0	0.0	12.0	0.0	0.0	0.0	0.0	0.0
788eab5c74943e4432df5819b7d1e4f5	0.0	38.0	35.0	19.0	0.0	0.0	0.0	0.0	0.0	0.0	0.0	0.0	0.0	0.0
6376ea6dab7d0fde3cd66f53b57e1484	0.0	0.0	0.0	0.0	92.0	0.0	0.0	0.0	0.0	0.0	0.0	0.0	0.0	0.0
88dc8d2d69d19a98b3accc3f50d82922	0.0	0.0	0.0	0.0	0.0	0.0	79.0	13.0	0.0	0.0	0.0	0.0	0.0	0.0
4fdc77cf1942e45cbb682c25c334ea4c	0.0	0.0	0.0	0.0	0.0	0.0	13.0	61.0	0.0	18.0	0.0	0.0	0.0	0.0
66259507c8612e2b91a688e949cffe02	0.0	0.0	0.0	0.0	0.0	0.0	0.0	0.0	92.0	0.0	0.0	0.0	0.0	0.0
a1ce4c8606e484d81772c756d7adda9b	0.0	0.0	0.0	0.0	0.0	0.0	0.0	0.0	92.0	0.0	0.0	0.0	0.0	0.0
f3a5a1bd1a38e446b3f3d31106009dd6	0.0	0.0	0.0	0.0	0.0	0.0	0.0	0.0	92.0	0.0	0.0	0.0	0.0	0.0
17447d0b860cb54cccea573e29a433a7	0.0	0.0	0.0	0.0	0.0	0.0	0.0	0.0	47.0	45.0	0.0	0.0	0.0	0.0
a57db23dc5a5d17ed1a34d0a994a1fc8	0.0	0.0	0.0	0.0	0.0	0.0	0.0	0.0	35.0	0.0	57.0	0.0	0.0	0.0
e7bb9262d4a46496167a210fc459688d	0.0	0.0	0.0	0.0	0.0	0.0	0.0	0.0	0.0	0.0	92.0	0.0	0.0	0.0
c344c6c584c663a222c735d50eabb47d	0.0	0.0	0.0	0.0	0.0	0.0	0.0	0.0	0.0	0.0	0.0	73.0	19.0	0.0
670944fc1b5284d03116d9aebd947afd	0.0	63.0	0.0	0.0	0.0	0.0	28.0	0.0	0.0	0.0	0.0	0.0	0.0	0.0
87936ddcccdbf8a98f00aa1b9a07d8ed	0.0	32.0	33.0	26.0	0.0	0.0	0.0	0.0	0.0	0.0	0.0	0.0	0.0	0.0
7a67829240bc3b836b920318f67c4b1a	0.0	0.0	0.0	0.0	0.0	0.0	0.0	0.0	91.0	0.0	0.0	0.0	0.0	0.0
1404c6723372dab5cfe8f58686f32075	0.0	0.0	0.0	0.0	0.0	0.0	0.0	0.0	91.0	0.0	0.0	0.0	0.0	0.0
22aedf9abf7a24a2596726b38435025a	0.0	0.0	0.0	0.0	0.0	0.0	0.0	0.0	91.0	0.0	0.0	0.0	0.0	0.0
c1d9eada909d2d5dbe078f25f1038508	0.0	0.0	0.0	0.0	0.0	0.0	0.0	0.0	0.0	0.0	0.0	0.0	0.0	91.0
800e35a1987c1d984f1cb34a22702c1f	0.0	55.0	35.0	0.0	0.0	0.0	0.0	0.0	0.0	0.0	0.0	0.0	0.0	0.0
bb318602c562f882b371bc9d88d0ce5c	0.0	0.0	12.0	0.0	0.0	0.0	0.0	0.0	37.0	41.0	0.0	0.0	0.0	0.0
2c31849e1e781d2fc1712b57a6a92885	0.0	0.0	0.0	0.0	0.0	0.0	0.0	0.0	90.0	0.0	0.0	0.0	0.0	0.0
173732da6e539c4e1e8cc90f79b55bd9	0.0	0.0	0.0	0.0	0.0	0.0	0.0	0.0	90.0	0.0	0.0	0.0	0.0	0.0
7811b6ee66da4683522fbbfebc0d5224	0.0	0.0	0.0	0.0	0.0	0.0	0.0	0.0	90.0	0.0	0.0	0.0	0.0	0.0
f84f321abce9dde03092c462069e0111	0.0	0.0	0.0	0.0	0.0	0.0	0.0	0.0	0.0	0.0	40.0	23.0	27.0	0.0
b78620b6d0446601dbf2e37dded1bae2	11.0	37.0	16.0	15.0	0.0	10.0	0.0	0.0	0.0	0.0	0.0	0.0	0.0	0.0
fbaefeb0df8b989a5a795130c177831c	0.0	89.0	0.0	0.0	0.0	0.0	0.0	0.0	0.0	0.0	0.0	0.0	0.0	0.0
96ae3e9d4ef1699d9f4349025dd58e8c	0.0	65.0	0.0	0.0	0.0	0.0	24.0	0.0	0.0	0.0	0.0	0.0	0.0	0.0
c3aa11832636cb971c3c9e577c30f881	0.0	0.0	36.0	18.0	0.0	0.0	0.0	0.0	0.0	0.0	5.0	30.0	0.0	0.0
7a1dc43a27918a71f4073c2faad5f13f	0.0	0.0	0.0	0.0	0.0	0.0	0.0	19.0	44.0	26.0	0.0	0.0	0.0	0.0
bf7312663bb8d8c2ef838cc6b788fe48	0.0	0.0	0.0	0.0	0.0	0.0	0.0	0.0	89.0	0.0	0.0	0.0	0.0	0.0
29aed4cf137f94ba1e04cbcbc9a7f00b	0.0	88.0	0.0	0.0	0.0	0.0	0.0	0.0	0.0	0.0	0.0	0.0	0.0	0.0
b7d6cf3f7467ca45087ca083796a0af0	0.0	40.0	28.0	0.0	0.0	20.0	0.0	0.0	0.0	0.0	0.0	0.0	0.0	0.0
eda253fbbfa164d5b5b159a586e84bcf	0.0	38.0	0.0	0.0	0.0	0.0	50.0	0.0	0.0	0.0	0.0	0.0	0.0	0.0
5e540e5399ed4d1cee781d4282a68507	0.0	36.0	27.0	25.0	0.0	0.0	0.0	0.0	0.0	0.0	0.0	0.0	0.0	0.0
99d820559eec1551e7752386d7916c03	0.0	27.0	34.0	27.0	0.0	0.0	0.0	0.0	0.0	0.0	0.0	0.0	0.0	0.0
d70adaf7d3d98a3004a9dcf45f734e64	0.0	0.0	0.0	0.0	0.0	0.0	0.0	0.0	88.0	0.0	0.0	0.0	0.0	0.0
d728ca7d99a8a29d8d689e015c7b7c26	0.0	0.0	0.0	0.0	0.0	0.0	0.0	0.0	88.0	0.0	0.0	0.0	0.0	0.0
a3e349c0dc4e06e199630dcaa5e5b2e4	0.0	0.0	0.0	0.0	0.0	0.0	0.0	0.0	0.0	0.0	0.0	0.0	88.0	0.0
9b27e135979689d70d504c618e9f2138	5.0	52.0	30.0	0.0	0.0	0.0	0.0	0.0	0.0	0.0	0.0	0.0	0.0	0.0
27e159d619cf0d701d1e2c8716eafb14	0.0	53.0	0.0	34.0	0.0	0.0	0.0	0.0	0.0	0.0	0.0	0.0	0.0	0.0
94f24a78e4aa318756fc85e395f3df3c	0.0	29.0	24.0	34.0	0.0	0.0	0.0	0.0	0.0	0.0	0.0	0.0	0.0	0.0
3661925a0f7ce8f3050c372e1b124ad5	0.0	0.0	0.0	0.0	87.0	0.0	0.0	0.0	0.0	0.0	0.0	0.0	0.0	0.0
eae535b10eeeca0d29c5c97e3e0c9abd	0.0	0.0	0.0	0.0	0.0	0.0	0.0	0.0	87.0	0.0	0.0	0.0	0.0	0.0
1a42a89cb9a6a5c503049a45d4fa3130	0.0	0.0	0.0	0.0	0.0	0.0	0.0	0.0	87.0	0.0	0.0	0.0	0.0	0.0
a30303e40a813796d55d05cf4a550231	21.0	0.0	0.0	0.0	0.0	0.0	0.0	0.0	0.0	0.0	0.0	42.0	23.0	0.0
edbafd4bb2335ff703b39312f6da76b1	0.0	86.0	0.0	0.0	0.0	0.0	0.0	0.0	0.0	0.0	0.0	0.0	0.0	0.0
0bcf4d29395fa40a972843fa31ee6d8a	0.0	63.0	23.0	0.0	0.0	0.0	0.0	0.0	0.0	0.0	0.0	0.0	0.0	0.0
c353d088f430a354906ab7e0f14c8c5d	0.0	34.0	21.0	27.0	0.0	0.0	0.0	4.0	0.0	0.0	0.0	0.0	0.0	0.0
c23d221ef4d2c66d2f0bc6d9371d0e9c	0.0	0.0	0.0	0.0	0.0	0.0	0.0	0.0	86.0	0.0	0.0	0.0	0.0	0.0
18e2e7b8bc06ff7d03aa1846beb7848b	0.0	85.0	0.0	0.0	0.0	0.0	0.0	0.0	0.0	0.0	0.0	0.0	0.0	0.0
48ad9b5bbf12b65767448b349b7c6ca6	0.0	0.0	12.0	0.0	0.0	27.0	0.0	0.0	0.0	21.0	25.0	0.0	0.0	0.0
b3b7bd6f53061f87325fe905486dbe74	0.0	0.0	0.0	0.0	85.0	0.0	0.0	0.0	0.0	0.0	0.0	0.0	0.0	0.0
8574ce4a53962d679c8a47abc12033e4	0.0	28.0	0.0	8.0	0.0	0.0	0.0	5.0	0.0	0.0	26.0	0.0	17.0	0.0
41e56aeb5317c0ffdc847bb0bd4544d7	0.0	20.0	27.0	12.0	0.0	0.0	0.0	0.0	0.0	0.0	11.0	3.0	11.0	0.0
107ecdf382f2b6d789d697fc2a10b623	0.0	0.0	0.0	0.0	0.0	84.0	0.0	0.0	0.0	0.0	0.0	0.0	0.0	0.0
5638d8b8d1658ee61e5f5ffa6228c1a7	0.0	0.0	0.0	0.0	0.0	0.0	12.0	0.0	51.0	21.0	0.0	0.0	0.0	0.0
ff98ab846c8f29e5e5f5cce385b28a7b	0.0	0.0	0.0	0.0	0.0	0.0	0.0	0.0	84.0	0.0	0.0	0.0	0.0	0.0
b1e3d80d7cc83963eda491587548e6d5	0.0	0.0	0.0	0.0	0.0	0.0	0.0	0.0	84.0	0.0	0.0	0.0	0.0	0.0
c2ab4fd0ba77d5f7f6be514f1bdd4cc8	0.0	0.0	0.0	0.0	0.0	0.0	0.0	0.0	84.0	0.0	0.0	0.0	0.0	0.0
28bc4d20befe48bd9fc12456d11ad7d5	0.0	0.0	0.0	0.0	0.0	0.0	0.0	0.0	41.0	43.0	0.0	0.0	0.0	0.0
540b4a5d066b0aabd0947d4068b0ee3a	0.0	40.0	15.0	28.0	0.0	0.0	0.0	0.0	0.0	0.0	0.0	0.0	0.0	0.0
05db7360f0cfd0cb15b8802be7b58964	0.0	34.0	15.0	30.0	0.0	0.0	4.0	0.0	0.0	0.0	0.0	0.0	0.0	0.0
ce63ae5ff8e285a1d97f84772d6344f2	0.0	32.0	16.0	16.0	0.0	0.0	0.0	0.0	19.0	0.0	0.0	0.0	0.0	0.0
84f17f89e51942242021b8668202aec6	0.0	31.0	36.0	16.0	0.0	0.0	0.0	0.0	0.0	0.0	0.0	0.0	0.0	0.0
d76cd4f1a17908bca2d51d623b594469	0.0	0.0	28.0	20.0	0.0	0.0	12.0	23.0	0.0	0.0	0.0	0.0	0.0	0.0
4b7560eaea37db0087a28987b1cc6e0b	0.0	0.0	0.0	0.0	0.0	0.0	0.0	30.0	33.0	20.0	0.0	0.0	0.0	0.0
ec8d82ca81b640042cc59f84966cca3c	0.0	0.0	0.0	0.0	0.0	0.0	0.0	3.0	80.0	0.0	0.0	0.0	0.0	0.0
ac2a47483fc2b022dda36267cd67ac80	0.0	0.0	0.0	0.0	0.0	0.0	0.0	0.0	83.0	0.0	0.0	0.0	0.0	0.0
0976b9fe474c38437f03f1dab2eb80c0	0.0	0.0	0.0	0.0	0.0	0.0	0.0	0.0	83.0	0.0	0.0	0.0	0.0	0.0
c5b2a2228f1aef6f2546ed60d43b5c51	0.0	0.0	0.0	0.0	0.0	0.0	0.0	0.0	0.0	83.0	0.0	0.0	0.0	0.0
6d2726a8618a4a00b5a2d8ee65ba0904	22.0	0.0	0.0	0.0	0.0	60.0	0.0	0.0	0.0	0.0	0.0	0.0	0.0	0.0
e661631d2518f3793d6269ccf30dde1c	0.0	45.0	14.0	23.0	0.0	0.0	0.0	0.0	0.0	0.0	0.0	0.0	0.0	0.0
b6c29e44f5719777e53de1a91472c8b4	0.0	38.0	23.0	21.0	0.0	0.0	0.0	0.0	0.0	0.0	0.0	0.0	0.0	0.0
67dab9714532e2e5809db3032111ff86	0.0	25.0	0.0	25.0	0.0	0.0	11.0	0.0	0.0	0.0	21.0	0.0	0.0	0.0
ab52dbacef166ea6bd9ac77895a25a3b	0.0	22.0	0.0	0.0	0.0	0.0	0.0	0.0	60.0	0.0	0.0	0.0	0.0	0.0
4c608070692be694f2714e1505992bac	0.0	0.0	0.0	0.0	82.0	0.0	0.0	0.0	0.0	0.0	0.0	0.0	0.0	0.0
ca8ff83198bba26e7e78f02eceb66779	0.0	0.0	0.0	0.0	0.0	34.0	0.0	0.0	35.0	13.0	0.0	0.0	0.0	0.0
001d49fb339777c4d3f9eda082fdc521	0.0	0.0	0.0	0.0	0.0	0.0	0.0	0.0	82.0	0.0	0.0	0.0	0.0	0.0
f8ae1e290e95e28572ada1e76b839cdd	0.0	56.0	25.0	0.0	0.0	0.0	0.0	0.0	0.0	0.0	0.0	0.0	0.0	0.0
3c97fe3589ece86d7039d209dedf0e9d	0.0	39.0	20.0	22.0	0.0	0.0	0.0	0.0	0.0	0.0	0.0	0.0	0.0	0.0
c2d7fec849de8a148e40b5a6c35cc1c8	0.0	20.0	29.0	0.0	0.0	0.0	0.0	0.0	32.0	0.0	0.0	0.0	0.0	0.0
3e125655918e305a3842a79b6972775f	0.0	0.0	0.0	0.0	0.0	8.0	0.0	0.0	73.0	0.0	0.0	0.0	0.0	0.0
09e941a637a7c8284e4e84853cf5b804	0.0	0.0	0.0	0.0	0.0	0.0	0.0	8.0	49.0	24.0	0.0	0.0	0.0	0.0
4d06ad9c87671acd6ef92de3bb6493a2	0.0	0.0	0.0	0.0	0.0	0.0	0.0	0.0	81.0	0.0	0.0	0.0	0.0	0.0
9f7749b8adac3326ec2b2e6099532a2b	0.0	0.0	0.0	0.0	0.0	0.0	0.0	0.0	0.0	0.0	0.0	81.0	0.0	0.0
89e9892f469729476829d9a26df453f7	10.0	18.0	9.0	12.0	0.0	0.0	0.0	6.0	0.0	0.0	20.0	5.0	0.0	0.0
2e180c84af91886e7de0c8723314e596	0.0	50.0	13.0	17.0	0.0	0.0	0.0	0.0	0.0	0.0	0.0	0.0	0.0	0.0
7f2c18992500c2d1f4006df02e4996b6	0.0	40.0	24.0	16.0	0.0	0.0	0.0	0.0	0.0	0.0	0.0	0.0	0.0	0.0
a0203d8d06f73014af0194ada6f68970	0.0	0.0	0.0	0.0	0.0	0.0	0.0	0.0	80.0	0.0	0.0	0.0	0.0	0.0
5a5337b158b0417cfe528b0bbf960fca	0.0	0.0	0.0	0.0	0.0	0.0	0.0	0.0	80.0	0.0	0.0	0.0	0.0	0.0
d63bc9311b81c42939650494b716b7c7	0.0	0.0	0.0	0.0	0.0	0.0	0.0	0.0	80.0	0.0	0.0	0.0	0.0	0.0
8694aeadd181294daddeab35500fc3ba	0.0	57.0	22.0	0.0	0.0	0.0	0.0	0.0	0.0	0.0	0.0	0.0	0.0	0.0
9c6e2614e9586406f4b6a9dc0fa35c39	0.0	43.0	18.0	18.0	0.0	0.0	0.0	0.0	0.0	0.0	0.0	0.0	0.0	0.0
bdbacd1617b11e320d0247582efd0581	0.0	35.0	11.0	0.0	0.0	0.0	0.0	0.0	0.0	0.0	33.0	0.0	0.0	0.0
688974d66960ec3e549c1a2a80bc05b0	0.0	32.0	23.0	24.0	0.0	0.0	0.0	0.0	0.0	0.0	0.0	0.0	0.0	0.0
4be73cbbba127773139adf95d5c5c1bf	0.0	13.0	0.0	10.0	0.0	19.0	0.0	0.0	0.0	0.0	0.0	37.0	0.0	0.0
1de8d461eb9271ff4c0a9ec27e0aeb03	0.0	11.0	0.0	0.0	0.0	10.0	16.0	11.0	0.0	6.0	18.0	7.0	0.0	0.0
0149c13a46858801cc17e1dbc15437c0	0.0	0.0	0.0	0.0	0.0	0.0	0.0	0.0	79.0	0.0	0.0	0.0	0.0	0.0
d8889747097266a8731c1a890e1378f2	0.0	0.0	0.0	0.0	0.0	0.0	0.0	0.0	79.0	0.0	0.0	0.0	0.0	0.0
c4538ac09d8c02440559daeaafcd095c	0.0	0.0	0.0	0.0	0.0	0.0	0.0	0.0	79.0	0.0	0.0	0.0	0.0	0.0
e7e8628e1a330dcf280ed5a20d96e7ea	0.0	0.0	0.0	0.0	0.0	0.0	0.0	0.0	79.0	0.0	0.0	0.0	0.0	0.0
b67e07843fb89378c95ebcf999b0d585	0.0	0.0	0.0	0.0	0.0	0.0	0.0	0.0	53.0	26.0	0.0	0.0	0.0	0.0
50876498e9c8139169b253a18c5fa132	0.0	0.0	0.0	0.0	0.0	0.0	0.0	0.0	0.0	0.0	22.0	57.0	0.0	0.0
1a9e1b218541ab17bd3b44fcb599d883	0.0	45.0	33.0	0.0	0.0	0.0	0.0	0.0	0.0	0.0	0.0	0.0	0.0	0.0
21088f1206c3a1b9594c7ca350461e9d	0.0	42.0	20.0	16.0	0.0	0.0	0.0	0.0	0.0	0.0	0.0	0.0	0.0	0.0
8be5b208c15b7511751d16fdf7a13be4	0.0	38.0	0.0	40.0	0.0	0.0	0.0	0.0	0.0	0.0	0.0	0.0	0.0	0.0
db5845126f0911a9cbbb4933789b16ff	0.0	26.0	18.0	27.0	0.0	7.0	0.0	0.0	0.0	0.0	0.0	0.0	0.0	0.0
11a0c670fa78234d1e1af0fa2993acc5	0.0	0.0	0.0	0.0	0.0	0.0	0.0	0.0	78.0	0.0	0.0	0.0	0.0	0.0
5afec052157f7768bf459883f118a638	0.0	0.0	0.0	0.0	0.0	0.0	0.0	0.0	78.0	0.0	0.0	0.0	0.0	0.0
056aa9f00b57269231907d97228aff1b	0.0	46.0	14.0	17.0	0.0	0.0	0.0	0.0	0.0	0.0	0.0	0.0	0.0	0.0
3cd4a17c38c1cd155522fd86e18d57a2	0.0	38.0	22.0	17.0	0.0	0.0	0.0	0.0	0.0	0.0	0.0	0.0	0.0	0.0
deef40a69e31639a2389778790f0c370	0.0	31.0	16.0	9.0	0.0	21.0	0.0	0.0	0.0	0.0	0.0	0.0	0.0	0.0
355b943e75d6bc47620d280fb44d09b6	0.0	0.0	0.0	0.0	77.0	0.0	0.0	0.0	0.0	0.0	0.0	0.0	0.0	0.0
d7b4047d9f1357b50df067c3821c58fe	0.0	0.0	0.0	0.0	0.0	0.0	0.0	0.0	66.0	11.0	0.0	0.0	0.0	0.0
b1514260e55f51a24a6e0ca85cbfd428	0.0	49.0	27.0	0.0	0.0	0.0	0.0	0.0	0.0	0.0	0.0	0.0	0.0	0.0
50451a70e9ff33521f2bae20026ae325	0.0	35.0	11.0	25.0	0.0	0.0	0.0	5.0	0.0	0.0	0.0	0.0	0.0	0.0
cadab640e721ebedf3a98194c976aab3	0.0	21.0	0.0	0.0	0.0	0.0	0.0	0.0	55.0	0.0	0.0	0.0	0.0	0.0
72c0694cbe32a649ea374e847c3128ca	0.0	0.0	0.0	0.0	0.0	0.0	47.0	29.0	0.0	0.0	0.0	0.0	0.0	0.0
e87f2dec671854bae47c21738dc2bc9f	0.0	0.0	0.0	0.0	0.0	0.0	0.0	0.0	76.0	0.0	0.0	0.0	0.0	0.0
a65a721d90a7e48010113435818d69be	0.0	0.0	0.0	0.0	0.0	0.0	0.0	0.0	76.0	0.0	0.0	0.0	0.0	0.0
ca019dc1f7991a3f2a30faf861bee144	0.0	0.0	0.0	0.0	0.0	0.0	0.0	0.0	76.0	0.0	0.0	0.0	0.0	0.0
189f03c207a924688e657f0c21d62994	0.0	0.0	0.0	0.0	0.0	0.0	0.0	0.0	62.0	14.0	0.0	0.0	0.0	0.0
d3abe1faede5b7e0d247455636cf04cf	0.0	43.0	16.0	16.0	0.0	0.0	0.0	0.0	0.0	0.0	0.0	0.0	0.0	0.0
b16940ce2aeb7eff42e9597e276356cc	0.0	36.0	22.0	17.0	0.0	0.0	0.0	0.0	0.0	0.0	0.0	0.0	0.0	0.0
2558bc333fb417006fcefd080a265d7c	0.0	36.0	0.0	39.0	0.0	0.0	0.0	0.0	0.0	0.0	0.0	0.0	0.0	0.0
6a79db8271cf2f1264579d0f016f50d9	0.0	20.0	13.0	25.0	0.0	0.0	0.0	0.0	17.0	0.0	0.0	0.0	0.0	0.0
381db3e70aaca7167c53dfdb4421f0e1	0.0	11.0	0.0	64.0	0.0	0.0	0.0	0.0	0.0	0.0	0.0	0.0	0.0	0.0
557626f1cdcad76867354e7512ca5c1a	0.0	0.0	0.0	0.0	0.0	0.0	37.0	38.0	0.0	0.0	0.0	0.0	0.0	0.0
b0238dade6e445fd3558fae596aa02b9	0.0	0.0	0.0	0.0	0.0	0.0	0.0	0.0	75.0	0.0	0.0	0.0	0.0	0.0
a145a0d4401bd6399024a46c933fe0e4	0.0	0.0	0.0	0.0	0.0	0.0	0.0	0.0	75.0	0.0	0.0	0.0	0.0	0.0
647b46bc5fa0fadf81008c9a121c2dd2	0.0	0.0	0.0	0.0	0.0	0.0	0.0	0.0	75.0	0.0	0.0	0.0	0.0	0.0
7a5001defcd84e20fc08dc6edce70749	0.0	0.0	0.0	0.0	0.0	0.0	0.0	0.0	69.0	6.0	0.0	0.0	0.0	0.0
ac74eb9e18ab45ed560fe7ad979e3b0f	0.0	0.0	0.0	0.0	0.0	0.0	0.0	0.0	0.0	0.0	75.0	0.0	0.0	0.0
1081caf84c2880becc0fb26c7cd50375	9.0	22.0	7.0	19.0	0.0	0.0	17.0	0.0	0.0	0.0	0.0	0.0	0.0	0.0
97b802aebea65d5442aee460e98ff942	0.0	45.0	0.0	29.0	0.0	0.0	0.0	0.0	0.0	0.0	0.0	0.0	0.0	0.0
afaab28f537a72577d22fb00949df1f6	0.0	43.0	31.0	0.0	0.0	0.0	0.0	0.0	0.0	0.0	0.0	0.0	0.0	0.0
938feb0428f9b9120bdaa88b50212aaa	0.0	41.0	16.0	17.0	0.0	0.0	0.0	0.0	0.0	0.0	0.0	0.0	0.0	0.0
fe142922b7b51fd41dc43e37a7b91553	0.0	37.0	0.0	6.0	0.0	0.0	6.0	0.0	17.0	8.0	0.0	0.0	0.0	0.0
e84bb7053a763a2a7aca18d3bc471605	0.0	34.0	23.0	17.0	0.0	0.0	0.0	0.0	0.0	0.0	0.0	0.0	0.0	0.0
fd766e1f3f7ec623acb88b66c5b32629	0.0	32.0	20.0	22.0	0.0	0.0	0.0	0.0	0.0	0.0	0.0	0.0	0.0	0.0
cc1b71cea293aea29f3b7ce2cff979d7	0.0	25.0	20.0	29.0	0.0	0.0	0.0	0.0	0.0	0.0	0.0	0.0	0.0	0.0
a3dfb398fac941fb1b568b3e3a5f10e0	0.0	0.0	0.0	0.0	0.0	16.0	24.0	11.0	0.0	0.0	23.0	0.0	0.0	0.0
c4c5b5884fd661baf982557a5559354a	0.0	0.0	0.0	0.0	0.0	15.0	0.0	0.0	59.0	0.0	0.0	0.0	0.0	0.0
6fee57a3194021d6d0f5608ebb3ed0d1	0.0	0.0	0.0	0.0	0.0	0.0	44.0	30.0	0.0	0.0	0.0	0.0	0.0	0.0
834e2b9dc7d4bb1722cdff78dedefd1a	0.0	0.0	0.0	0.0	0.0	0.0	0.0	0.0	0.0	0.0	0.0	74.0	0.0	0.0
d21770e0ebd5bfa0f229a0ede28286ff	19.0	37.0	17.0	0.0	0.0	0.0	0.0	0.0	0.0	0.0	0.0	0.0	0.0	0.0
ea04f2ed70b8a9ae88900506b4bfba03	0.0	47.0	26.0	0.0	0.0	0.0	0.0	0.0	0.0	0.0	0.0	0.0	0.0	0.0
d464aeb9d76d2c31ab25f8a630439a35	0.0	46.0	27.0	0.0	0.0	0.0	0.0	0.0	0.0	0.0	0.0	0.0	0.0	0.0
62eefd6e21210551c20a91a4a49a00fd	0.0	38.0	15.0	20.0	0.0	0.0	0.0	0.0	0.0	0.0	0.0	0.0	0.0	0.0
07b5efe4e9b8fa889bcdafbaa1a898ee	0.0	38.0	19.0	16.0	0.0	0.0	0.0	0.0	0.0	0.0	0.0	0.0	0.0	0.0
2b59b12eab282e1b24f417f0fe94274c	0.0	0.0	0.0	33.0	0.0	0.0	0.0	0.0	40.0	0.0	0.0	0.0	0.0	0.0
f5cb58f5143fec655c2e6449846bba4a	0.0	0.0	0.0	0.0	0.0	42.0	0.0	0.0	0.0	0.0	13.0	0.0	18.0	0.0
5fe8a79baa0e9601bc73ff3938dbf497	0.0	0.0	0.0	0.0	0.0	0.0	0.0	0.0	41.0	0.0	0.0	0.0	32.0	0.0
a1105eb636b7ce53bb27988757ba9a04	0.0	72.0	0.0	0.0	0.0	0.0	0.0	0.0	0.0	0.0	0.0	0.0	0.0	0.0
685e82838c690c9fe4faf534efedc204	0.0	53.0	0.0	19.0	0.0	0.0	0.0	0.0	0.0	0.0	0.0	0.0	0.0	0.0
840ca9f3379bb9dd83d910e9ebafd922	0.0	45.0	11.0	16.0	0.0	0.0	0.0	0.0	0.0	0.0	0.0	0.0	0.0	0.0
cb0a076fb0407d9f3f0171000ec7e90c	0.0	40.0	0.0	32.0	0.0	0.0	0.0	0.0	0.0	0.0	0.0	0.0	0.0	0.0
86e7e9036730017997a58f33c93d55c7	0.0	22.0	0.0	12.0	0.0	0.0	0.0	10.0	28.0	0.0	0.0	0.0	0.0	0.0
85d5b2895bffe228e0f48cebce318476	0.0	0.0	0.0	0.0	0.0	0.0	6.0	0.0	28.0	38.0	0.0	0.0	0.0	0.0
50dad88c23a442292efc4848346a0e8c	0.0	0.0	0.0	0.0	0.0	0.0	0.0	46.0	0.0	26.0	0.0	0.0	0.0	0.0
a49a7c5fdd8eb836614d65f8efbfb4b6	0.0	0.0	0.0	0.0	0.0	0.0	0.0	0.0	72.0	0.0	0.0	0.0	0.0	0.0
bc2fb39def257ffa17773333df88122b	0.0	0.0	0.0	0.0	0.0	0.0	0.0	0.0	72.0	0.0	0.0	0.0	0.0	0.0
880c8193037a4f84292b4adb9171533a	0.0	54.0	17.0	0.0	0.0	0.0	0.0	0.0	0.0	0.0	0.0	0.0	0.0	0.0
cebaa29930136dea0865112cf3583605	0.0	41.0	17.0	13.0	0.0	0.0	0.0	0.0	0.0	0.0	0.0	0.0	0.0	0.0
d10ffe77ef854be5b82b63580147d41d	0.0	30.0	13.0	20.0	0.0	0.0	0.0	5.0	0.0	0.0	3.0	0.0	0.0	0.0
e44ec1313a645c0e18b0a95669b5c1be	0.0	19.0	0.0	0.0	0.0	0.0	7.0	8.0	29.0	8.0	0.0	0.0	0.0	0.0
868e0165fe32a8925b7f20afa5e1dbfc	0.0	0.0	0.0	0.0	71.0	0.0	0.0	0.0	0.0	0.0	0.0	0.0	0.0	0.0
7fbf4a99f476e7db2cbef86297c2527a	0.0	0.0	0.0	0.0	0.0	4.0	0.0	0.0	67.0	0.0	0.0	0.0	0.0	0.0
8e7bcaada3e1a3acd35729a53b027481	0.0	0.0	0.0	0.0	0.0	0.0	0.0	0.0	71.0	0.0	0.0	0.0	0.0	0.0
7dbaa1a3b50c48dcae10b978f4958a89	0.0	0.0	0.0	0.0	0.0	0.0	0.0	0.0	71.0	0.0	0.0	0.0	0.0	0.0
15c1c3c6b3755a72c95a9cdc9ec5ad28	0.0	0.0	0.0	0.0	0.0	0.0	0.0	0.0	0.0	0.0	0.0	71.0	0.0	0.0
6e6f4d1ea594ee839ee0d1d081a0cd5b	3.0	0.0	0.0	0.0	0.0	24.0	10.0	29.0	0.0	0.0	0.0	4.0	0.0	0.0
839896dc619d81db2d18bf5739691a36	0.0	70.0	0.0	0.0	0.0	0.0	0.0	0.0	0.0	0.0	0.0	0.0	0.0	0.0
e9eb44c3de98f0db34aafa03331d1a39	0.0	44.0	16.0	10.0	0.0	0.0	0.0	0.0	0.0	0.0	0.0	0.0	0.0	0.0
64db8404bb5d297d9e37f6fb3ad2010c	0.0	39.0	12.0	19.0	0.0	0.0	0.0	0.0	0.0	0.0	0.0	0.0	0.0	0.0
ede684fe9fbe6404a21995c912a5862b	0.0	0.0	34.0	36.0	0.0	0.0	0.0	0.0	0.0	0.0	0.0	0.0	0.0	0.0
452004bfc4981f8d4a913fce0860a8c8	0.0	0.0	0.0	0.0	70.0	0.0	0.0	0.0	0.0	0.0	0.0	0.0	0.0	0.0
7d217addfd80cb5393d81dae5f160367	0.0	0.0	0.0	0.0	70.0	0.0	0.0	0.0	0.0	0.0	0.0	0.0	0.0	0.0
4cf91110ab84f70072d3049a6f1215ce	0.0	0.0	0.0	0.0	0.0	54.0	0.0	0.0	0.0	0.0	10.0	0.0	6.0	0.0
54163dcbe4ea5f5c8f4c2041f3221136	0.0	0.0	0.0	0.0	0.0	0.0	0.0	0.0	61.0	9.0	0.0	0.0	0.0	0.0
34aa6c5419744d81f8075eade565b9ea	15.0	0.0	29.0	0.0	0.0	0.0	0.0	0.0	0.0	0.0	25.0	0.0	0.0	0.0
329f692a592e619363ad944c9f337e99	0.0	61.0	0.0	8.0	0.0	0.0	0.0	0.0	0.0	0.0	0.0	0.0	0.0	0.0
4f8d723af22a17f6fb2fc77695e50478	0.0	58.0	0.0	0.0	0.0	0.0	11.0	0.0	0.0	0.0	0.0	0.0	0.0	0.0
db30bfa14b0cd36a31d9d1bd5aae464f	0.0	44.0	0.0	0.0	0.0	16.0	0.0	0.0	0.0	0.0	3.0	6.0	0.0	0.0
09fa1db71e04ce4cd7861ad04b994826	0.0	38.0	31.0	0.0	0.0	0.0	0.0	0.0	0.0	0.0	0.0	0.0	0.0	0.0
fc0381c6cdd4fe790bbd0b7a15d0bad0	0.0	36.0	16.0	17.0	0.0	0.0	0.0	0.0	0.0	0.0	0.0	0.0	0.0	0.0
bce01652cc5cb47aa66ddf13931362da	0.0	28.0	15.0	17.0	0.0	0.0	9.0	0.0	0.0	0.0	0.0	0.0	0.0	0.0
90dfecb460635dce34e7e68f3b48d7c3	0.0	18.0	0.0	16.0	0.0	0.0	0.0	0.0	28.0	0.0	0.0	0.0	7.0	0.0
2d764b109a11f2c5ca30f0bb59e5d9b6	0.0	0.0	39.0	30.0	0.0	0.0	0.0	0.0	0.0	0.0	0.0	0.0	0.0	0.0
595e3f9fc0e7b5f94481938cb8d2e13d	0.0	0.0	28.0	29.0	0.0	12.0	0.0	0.0	0.0	0.0	0.0	0.0	0.0	0.0
b9c0071a4a0d01910f452316a66b5504	0.0	0.0	0.0	0.0	0.0	30.0	26.0	0.0	0.0	13.0	0.0	0.0	0.0	0.0
2fe63a06a460d592fc3dcbe61daf76ba	0.0	0.0	0.0	0.0	0.0	0.0	0.0	0.0	69.0	0.0	0.0	0.0	0.0	0.0
81c28960ad28db5d3ee44a4a9422e128	0.0	0.0	0.0	0.0	0.0	0.0	0.0	0.0	61.0	8.0	0.0	0.0	0.0	0.0
fcb9d94e96f59759dcb5d195b08194eb	0.0	0.0	0.0	0.0	0.0	0.0	0.0	0.0	60.0	9.0	0.0	0.0	0.0	0.0
4c54bc88e7a006615f92a623f22d83f9	0.0	68.0	0.0	0.0	0.0	0.0	0.0	0.0	0.0	0.0	0.0	0.0	0.0	0.0
5fc7e6ef6a5cfda515cd05468202e6bf	0.0	68.0	0.0	0.0	0.0	0.0	0.0	0.0	0.0	0.0	0.0	0.0	0.0	0.0
c1ee0c7bd2a5652c66779004eebac27c	0.0	52.0	0.0	16.0	0.0	0.0	0.0	0.0	0.0	0.0	0.0	0.0	0.0	0.0
fd8bc24249627703cab895d1b8109c57	0.0	32.0	10.0	15.0	0.0	0.0	0.0	0.0	11.0	0.0	0.0	0.0	0.0	0.0
46069e64d3e77fef53e74bc3f1f037c0	0.0	32.0	25.0	11.0	0.0	0.0	0.0	0.0	0.0	0.0	0.0	0.0	0.0	0.0
5b890ae51bd10d65f26ef81fd3579f7e	0.0	19.0	0.0	18.0	0.0	0.0	0.0	31.0	0.0	0.0	0.0	0.0	0.0	0.0
a21fc26b0d5f89da6136be69e1380e65	0.0	0.0	0.0	0.0	68.0	0.0	0.0	0.0	0.0	0.0	0.0	0.0	0.0	0.0
ce42c209b5ecb70cb225c560cf5f9366	0.0	0.0	0.0	0.0	0.0	0.0	0.0	0.0	68.0	0.0	0.0	0.0	0.0	0.0
662380f2b6f56586220b1d15f7da48f8	0.0	0.0	0.0	0.0	0.0	0.0	0.0	0.0	0.0	0.0	0.0	68.0	0.0	0.0
114903237acb8b72b598e66b8cfd9707	24.0	0.0	0.0	0.0	0.0	27.0	0.0	0.0	0.0	16.0	0.0	0.0	0.0	0.0
00127c947978d94064c88b00340c48e4	0.0	67.0	0.0	0.0	0.0	0.0	0.0	0.0	0.0	0.0	0.0	0.0	0.0	0.0
1f582b58a39968c91ff3f3c2d6405e01	0.0	33.0	18.0	16.0	0.0	0.0	0.0	0.0	0.0	0.0	0.0	0.0	0.0	0.0
6615f072555946b71daf9ffb35165f74	0.0	32.0	16.0	19.0	0.0	0.0	0.0	0.0	0.0	0.0	0.0	0.0	0.0	0.0
9311721dbd02cbe64c33d0223aff2ec7	0.0	26.0	23.0	18.0	0.0	0.0	0.0	0.0	0.0	0.0	0.0	0.0	0.0	0.0
d68f525366c1dfdc0984a90b89867e95	0.0	26.0	18.0	23.0	0.0	0.0	0.0	0.0	0.0	0.0	0.0	0.0	0.0	0.0
b7a07939d4875f2d87d9a355a769398a	0.0	26.0	8.0	33.0	0.0	0.0	0.0	0.0	0.0	0.0	0.0	0.0	0.0	0.0
b2e124c33efae55b5917ca10bedaca06	0.0	0.0	26.0	41.0	0.0	0.0	0.0	0.0	0.0	0.0	0.0	0.0	0.0	0.0
abab274ac41811f11c506a82ad9cb9d1	0.0	0.0	0.0	0.0	0.0	0.0	0.0	0.0	67.0	0.0	0.0	0.0	0.0	0.0
18530d3a6625499fe053c53923541441	0.0	0.0	0.0	0.0	0.0	0.0	0.0	0.0	38.0	29.0	0.0	0.0	0.0	0.0
5513b02952faf7f0a9b40c7a5eaab2aa	0.0	41.0	0.0	25.0	0.0	0.0	0.0	0.0	0.0	0.0	0.0	0.0	0.0	0.0
a27f7ed774aa19d64402a2e223fa4146	0.0	28.0	10.0	0.0	0.0	28.0	0.0	0.0	0.0	0.0	0.0	0.0	0.0	0.0
652189e2b12b784b904537c41260bfa6	0.0	0.0	0.0	0.0	0.0	0.0	13.0	35.0	0.0	18.0	0.0	0.0	0.0	0.0
db9eecf8306b14682074e5332d07306a	0.0	0.0	0.0	0.0	0.0	0.0	0.0	0.0	66.0	0.0	0.0	0.0	0.0	0.0
aef0c11cff884a5e04166129fac0ba78	0.0	0.0	0.0	0.0	0.0	0.0	0.0	0.0	66.0	0.0	0.0	0.0	0.0	0.0
7f945a4d8cf0505a3cac0dc02815b09a	0.0	0.0	0.0	0.0	0.0	0.0	0.0	0.0	66.0	0.0	0.0	0.0	0.0	0.0
c2df4f2ca8d6cfb22c527e420abc9c7c	0.0	0.0	0.0	0.0	0.0	0.0	0.0	0.0	66.0	0.0	0.0	0.0	0.0	0.0
cee15aadf10b9cf987099007d11b489f	0.0	0.0	0.0	0.0	0.0	0.0	0.0	0.0	66.0	0.0	0.0	0.0	0.0	0.0
ef6b3ab6c6bef357dae19bdefd3df6eb	22.0	0.0	0.0	0.0	0.0	22.0	0.0	0.0	0.0	0.0	11.0	0.0	10.0	0.0
c2d2407a6a3fe62616cb3cd837468d5f	4.0	19.0	0.0	22.0	0.0	9.0	0.0	0.0	0.0	0.0	3.0	0.0	8.0	0.0
091170abb20a86c5fcf5b7e7979aa281	0.0	27.0	19.0	19.0	0.0	0.0	0.0	0.0	0.0	0.0	0.0	0.0	0.0	0.0
a04b601c3aab72f258b8668a4fed76a4	0.0	0.0	26.0	39.0	0.0	0.0	0.0	0.0	0.0	0.0	0.0	0.0	0.0	0.0
285bfcf58e6f5f2669ba8a2efb4ed898	0.0	0.0	0.0	0.0	0.0	13.0	0.0	0.0	0.0	41.0	11.0	0.0	0.0	0.0
9117c10a38db3805db93f4a1312648ae	0.0	0.0	0.0	0.0	0.0	0.0	0.0	0.0	65.0	0.0	0.0	0.0	0.0	0.0
02b215b61d48b2c254fd40b36603d80d	0.0	0.0	0.0	0.0	0.0	0.0	0.0	0.0	56.0	9.0	0.0	0.0	0.0	0.0
90aca794c7e30b8a77e87f13ffc9a5cc	0.0	64.0	0.0	0.0	0.0	0.0	0.0	0.0	0.0	0.0	0.0	0.0	0.0	0.0
1ff9a6e12e87230d78503120af626507	0.0	31.0	33.0	0.0	0.0	0.0	0.0	0.0	0.0	0.0	0.0	0.0	0.0	0.0
cfd9a5b9d95deeac5395a6ecbefcf7a0	0.0	29.0	9.0	26.0	0.0	0.0	0.0	0.0	0.0	0.0	0.0	0.0	0.0	0.0
5d9f8d99036f4dcd80a88b9ebddd01e9	0.0	21.0	24.0	19.0	0.0	0.0	0.0	0.0	0.0	0.0	0.0	0.0	0.0	0.0
59364744507fc064189cc76039389725	0.0	0.0	0.0	0.0	64.0	0.0	0.0	0.0	0.0	0.0	0.0	0.0	0.0	0.0
9bdcfd7f710d722cd09afd800cf580f3	0.0	0.0	0.0	0.0	0.0	6.0	17.0	0.0	41.0	0.0	0.0	0.0	0.0	0.0
49295cd5555beb1967621c37127ef86e	0.0	0.0	0.0	0.0	0.0	0.0	35.0	29.0	0.0	0.0	0.0	0.0	0.0	0.0
875323affec03ddd73e936f888fac408	0.0	0.0	0.0	0.0	0.0	0.0	0.0	0.0	64.0	0.0	0.0	0.0	0.0	0.0
a3ddccc10b27de590463f3fffd971766	0.0	0.0	0.0	0.0	0.0	0.0	0.0	0.0	64.0	0.0	0.0	0.0	0.0	0.0
b54f2bc11a015936658c0a48a3272701	0.0	0.0	0.0	0.0	0.0	0.0	0.0	0.0	64.0	0.0	0.0	0.0	0.0	0.0
d16453ff3f55394eae657c53098f7983	0.0	0.0	0.0	0.0	0.0	0.0	0.0	0.0	64.0	0.0	0.0	0.0	0.0	0.0
9912705b17e1f43b29329c993ff0bb5d	0.0	0.0	0.0	0.0	0.0	0.0	0.0	0.0	64.0	0.0	0.0	0.0	0.0	0.0
f6098e76342dba0e2b1c09e56b69ab58	0.0	0.0	0.0	0.0	0.0	0.0	0.0	0.0	51.0	13.0	0.0	0.0	0.0	0.0
525d21cbb3e57bc95345ffee7eccc02f	0.0	0.0	0.0	0.0	0.0	0.0	0.0	0.0	49.0	15.0	0.0	0.0	0.0	0.0
1338e4019753274936ef0ce2a3188c9d	0.0	41.0	22.0	0.0	0.0	0.0	0.0	0.0	0.0	0.0	0.0	0.0	0.0	0.0
e5e78baf5242a06bb692cb67ca33e0c8	0.0	32.0	11.0	15.0	0.0	5.0	0.0	0.0	0.0	0.0	0.0	0.0	0.0	0.0
a1d83433e07f97fd446f7ff512e44fc6	0.0	0.0	0.0	0.0	63.0	0.0	0.0	0.0	0.0	0.0	0.0	0.0	0.0	0.0
1f2c5cee479756b4c1d168271ca131d5	0.0	0.0	0.0	0.0	63.0	0.0	0.0	0.0	0.0	0.0	0.0	0.0	0.0	0.0
bfe9a8191ec9959c26c941a593f7099b	0.0	0.0	0.0	0.0	0.0	5.0	0.0	0.0	58.0	0.0	0.0	0.0	0.0	0.0
407af3f279fd058b8c3c98f55b466ac0	0.0	0.0	0.0	0.0	0.0	0.0	0.0	0.0	63.0	0.0	0.0	0.0	0.0	0.0
581600b81676b283c0f8b9ce9e1bf365	0.0	0.0	0.0	0.0	0.0	0.0	0.0	0.0	63.0	0.0	0.0	0.0	0.0	0.0
19ef24ebb904f7bac700ad897a8a63d8	0.0	0.0	0.0	0.0	0.0	0.0	0.0	0.0	16.0	47.0	0.0	0.0	0.0	0.0
13f40a76be08f92d0fc1420618c13eed	0.0	62.0	0.0	0.0	0.0	0.0	0.0	0.0	0.0	0.0	0.0	0.0	0.0	0.0
7437cd20a064cce555c460bad3f7dc90	0.0	62.0	0.0	0.0	0.0	0.0	0.0	0.0	0.0	0.0	0.0	0.0	0.0	0.0
cae922fc2f026c29b1b08332484f6a88	0.0	62.0	0.0	0.0	0.0	0.0	0.0	0.0	0.0	0.0	0.0	0.0	0.0	0.0
36ecebe2b77035b9d647a629501786a8	0.0	46.0	0.0	16.0	0.0	0.0	0.0	0.0	0.0	0.0	0.0	0.0	0.0	0.0
436d908febeb7a9c67879b27be16ff64	0.0	44.0	18.0	0.0	0.0	0.0	0.0	0.0	0.0	0.0	0.0	0.0	0.0	0.0
51e371ec276da92f57b556aa33a60f57	0.0	37.0	25.0	0.0	0.0	0.0	0.0	0.0	0.0	0.0	0.0	0.0	0.0	0.0
41e6c0b55654af1d5cd503359fb77d18	0.0	37.0	25.0	0.0	0.0	0.0	0.0	0.0	0.0	0.0	0.0	0.0	0.0	0.0
52ac7f5154090ed4a3e06cfee0d6a43a	0.0	27.0	12.0	23.0	0.0	0.0	0.0	0.0	0.0	0.0	0.0	0.0	0.0	0.0
de0d4f1686c3073a5cdd32c818c469ef	0.0	26.0	15.0	21.0	0.0	0.0	0.0	0.0	0.0	0.0	0.0	0.0	0.0	0.0
7eead715e53728a40aeb5424f043f4b8	0.0	26.0	15.0	21.0	0.0	0.0	0.0	0.0	0.0	0.0	0.0	0.0	0.0	0.0
a87828c66373f2f98c6c62447aca380b	0.0	25.0	16.0	21.0	0.0	0.0	0.0	0.0	0.0	0.0	0.0	0.0	0.0	0.0
c9098d06784a3bfa5003de9905262c41	0.0	24.0	23.0	15.0	0.0	0.0	0.0	0.0	0.0	0.0	0.0	0.0	0.0	0.0
514e3e07ccbf14d3f8584457ccb2d3b8	0.0	22.0	22.0	18.0	0.0	0.0	0.0	0.0	0.0	0.0	0.0	0.0	0.0	0.0
19c834fa014dd89a5fd8ddb3563e40b7	0.0	21.0	0.0	41.0	0.0	0.0	0.0	0.0	0.0	0.0	0.0	0.0	0.0	0.0
45976687d77be870c66bcf354f4da764	0.0	13.0	10.0	0.0	0.0	0.0	0.0	0.0	39.0	0.0	0.0	0.0	0.0	0.0
824d1cc1619a128a3dc45077c76b4a12	0.0	0.0	0.0	0.0	0.0	40.0	0.0	0.0	0.0	0.0	22.0	0.0	0.0	0.0
c416b63bd3509a6df8d6212932fd916e	0.0	0.0	0.0	0.0	0.0	0.0	62.0	0.0	0.0	0.0	0.0	0.0	0.0	0.0
71e3146b9f994cef2f3fb4577a188aa3	0.0	0.0	0.0	0.0	0.0	0.0	48.0	14.0	0.0	0.0	0.0	0.0	0.0	0.0
ef14c74a76414a3c7a569157e07e086b	0.0	0.0	0.0	0.0	0.0	0.0	0.0	0.0	62.0	0.0	0.0	0.0	0.0	0.0
3b75371c9bbc5ca9cde3bb4d2c240afd	0.0	0.0	0.0	0.0	0.0	0.0	0.0	0.0	62.0	0.0	0.0	0.0	0.0	0.0
a3fd582e3c6b747be66e34bd67a690c4	0.0	0.0	0.0	0.0	0.0	0.0	0.0	0.0	62.0	0.0	0.0	0.0	0.0	0.0
40f03404f784dbfb7416525222e6ab20	0.0	0.0	0.0	0.0	0.0	0.0	0.0	0.0	62.0	0.0	0.0	0.0	0.0	0.0
6fa8ced4cb1765617169e21dcf17a7eb	0.0	0.0	0.0	0.0	0.0	0.0	0.0	0.0	46.0	16.0	0.0	0.0	0.0	0.0
43f8d1ced946461f54ea0b5b7001d5d6	0.0	61.0	0.0	0.0	0.0	0.0	0.0	0.0	0.0	0.0	0.0	0.0	0.0	0.0
a63615ad072f1bd5ccd2b976f9f4ff1e	0.0	37.0	9.0	15.0	0.0	0.0	0.0	0.0	0.0	0.0	0.0	0.0	0.0	0.0
db4c2638a991af20508d4bba096b3e86	0.0	35.0	0.0	0.0	0.0	0.0	0.0	0.0	22.0	4.0	0.0	0.0	0.0	0.0
58b9be214f4da2b20a836153d014f9d5	0.0	24.0	20.0	17.0	0.0	0.0	0.0	0.0	0.0	0.0	0.0	0.0	0.0	0.0
3bcd53dd16ed587ab1107e84b335a89a	0.0	24.0	0.0	0.0	0.0	0.0	0.0	0.0	37.0	0.0	0.0	0.0	0.0	0.0
892e9832d3478002686181f4b0cea815	0.0	17.0	0.0	10.0	0.0	0.0	17.0	17.0	0.0	0.0	0.0	0.0	0.0	0.0
fec12509e371e79ba6c32e59055ed75a	0.0	16.0	16.0	0.0	0.0	0.0	0.0	0.0	0.0	0.0	23.0	0.0	6.0	0.0
bfea0939d1f0f2540672f484c49e8e96	0.0	0.0	0.0	4.0	0.0	13.0	21.0	14.0	0.0	0.0	9.0	0.0	0.0	0.0
5622abca6c62c927baed2427fb1f6650	0.0	0.0	0.0	0.0	0.0	0.0	13.0	0.0	41.0	7.0	0.0	0.0	0.0	0.0
9ef3321ad20cadc72156cab66b72a316	0.0	0.0	0.0	0.0	0.0	0.0	0.0	0.0	61.0	0.0	0.0	0.0	0.0	0.0
6cf01384259a1701a13c6557498a24ec	0.0	0.0	0.0	0.0	0.0	0.0	0.0	0.0	61.0	0.0	0.0	0.0	0.0	0.0
40fa96a2f7fc7b939f5eb0d52d7e5b3c	0.0	0.0	0.0	0.0	0.0	0.0	0.0	0.0	61.0	0.0	0.0	0.0	0.0	0.0
09784c389e1cb7008ba45da7b913851e	0.0	26.0	0.0	8.0	0.0	0.0	0.0	0.0	26.0	0.0	0.0	0.0	0.0	0.0
fd3e907759e6ec1831fd216eacdacf4d	0.0	0.0	0.0	0.0	0.0	0.0	60.0	0.0	0.0	0.0	0.0	0.0	0.0	0.0
d7eb65469eb45a0d002c0255314c9c22	0.0	0.0	0.0	0.0	0.0	0.0	13.0	0.0	0.0	0.0	18.0	8.0	21.0	0.0
9c6f9d1d33d8327e8dc5e00c3d9a69ad	0.0	0.0	0.0	0.0	0.0	0.0	0.0	0.0	60.0	0.0	0.0	0.0	0.0	0.0
762facf339b485a7d82a2f3fdef5d772	0.0	0.0	0.0	0.0	0.0	0.0	0.0	0.0	41.0	19.0	0.0	0.0	0.0	0.0
b8ad21aa3920853ae96430ad555e216d	0.0	0.0	0.0	0.0	0.0	0.0	0.0	0.0	36.0	24.0	0.0	0.0	0.0	0.0
ec2c7af590612040cedd3a8551fa49e0	0.0	0.0	0.0	0.0	0.0	0.0	0.0	0.0	33.0	27.0	0.0	0.0	0.0	0.0
c1f02e79ae302282a645e394eea8719b	0.0	59.0	0.0	0.0	0.0	0.0	0.0	0.0	0.0	0.0	0.0	0.0	0.0	0.0
800fab4ca14570f468457ef91a717694	0.0	33.0	9.0	17.0	0.0	0.0	0.0	0.0	0.0	0.0	0.0	0.0	0.0	0.0
2da31e61296f678bb466e1ae0593e33d	0.0	18.0	0.0	0.0	0.0	0.0	0.0	0.0	0.0	0.0	0.0	41.0	0.0	0.0
ac230d63edea9a0391933964f09f3e41	0.0	0.0	32.0	0.0	0.0	0.0	27.0	0.0	0.0	0.0	0.0	0.0	0.0	0.0
473014d4e7ff420d47a6612995b60f9f	0.0	0.0	0.0	0.0	0.0	0.0	15.0	33.0	0.0	11.0	0.0	0.0	0.0	0.0
9fa6193b5168ade620b5f09a51e463a4	0.0	0.0	0.0	0.0	0.0	0.0	0.0	0.0	59.0	0.0	0.0	0.0	0.0	0.0
08c468a337d238bc58c66027078dbee4	0.0	0.0	0.0	0.0	0.0	0.0	0.0	0.0	59.0	0.0	0.0	0.0	0.0	0.0
ffaec69347c1784e91a8049c6f3bf5eb	0.0	0.0	0.0	0.0	0.0	0.0	0.0	0.0	59.0	0.0	0.0	0.0	0.0	0.0
d2eda8eafb3d6774ab7d703bb5fdc023	0.0	0.0	0.0	0.0	0.0	0.0	0.0	0.0	0.0	0.0	59.0	0.0	0.0	0.0
16754e060d0b7f7ac8a08754e1a6c7bd	0.0	33.0	25.0	0.0	0.0	0.0	0.0	0.0	0.0	0.0	0.0	0.0	0.0	0.0
1a92fdf17261a5da47d5ebd39971fada	0.0	31.0	0.0	27.0	0.0	0.0	0.0	0.0	0.0	0.0	0.0	0.0	0.0	0.0
a0ed29caacedb63d450cdf3bbd1a3864	0.0	27.0	31.0	0.0	0.0	0.0	0.0	0.0	0.0	0.0	0.0	0.0	0.0	0.0
865ae6d4631de8bcb1fefd2bf28c8555	0.0	24.0	0.0	0.0	0.0	0.0	0.0	0.0	34.0	0.0	0.0	0.0	0.0	0.0
b82d78b5f5ba0b610f9a04c6eb9065fa	0.0	24.0	12.0	22.0	0.0	0.0	0.0	0.0	0.0	0.0	0.0	0.0	0.0	0.0
08bdc6c81f6b9daab3d132b54e1d45bc	0.0	23.0	20.0	15.0	0.0	0.0	0.0	0.0	0.0	0.0	0.0	0.0	0.0	0.0
f5fc388c9bb3ff88b6a19cce90590803	0.0	9.0	10.0	23.0	0.0	0.0	0.0	0.0	16.0	0.0	0.0	0.0	0.0	0.0
556d2892f2a8b8847a3247fcb0841b53	0.0	0.0	0.0	0.0	0.0	12.0	0.0	0.0	46.0	0.0	0.0	0.0	0.0	0.0
a8224b6247565e74c698e548463b3cd1	0.0	0.0	0.0	0.0	0.0	0.0	0.0	30.0	0.0	0.0	28.0	0.0	0.0	0.0
6654bd9f1a514a228dfcaef6013d28eb	0.0	0.0	0.0	0.0	0.0	0.0	0.0	0.0	58.0	0.0	0.0	0.0	0.0	0.0
f84a5455a4f6fb3979f21796cdff4da4	0.0	0.0	0.0	0.0	0.0	0.0	0.0	0.0	58.0	0.0	0.0	0.0	0.0	0.0
720f64d78f0164a7aa937387f9faf2b4	0.0	0.0	0.0	0.0	0.0	0.0	0.0	0.0	58.0	0.0	0.0	0.0	0.0	0.0
c72ae89740de69b27a9c1f186ea27377	0.0	0.0	0.0	0.0	0.0	0.0	0.0	0.0	58.0	0.0	0.0	0.0	0.0	0.0
8eed5182cc89ed9ef2a1ab886d8e0070	0.0	0.0	0.0	0.0	0.0	0.0	0.0	0.0	58.0	0.0	0.0	0.0	0.0	0.0
78b7ac98c7f188d863ae007fab0fd389	0.0	0.0	0.0	0.0	0.0	0.0	0.0	0.0	58.0	0.0	0.0	0.0	0.0	0.0
0e9117749e4d5b37df4fe678490445fc	0.0	0.0	0.0	0.0	0.0	0.0	0.0	0.0	0.0	0.0	58.0	0.0	0.0	0.0
890753fe38fcb22a3042e57041edb808	13.0	0.0	0.0	0.0	0.0	7.0	0.0	18.0	0.0	0.0	19.0	0.0	0.0	0.0
21b583c7b7d815dfd99cbce7a56b796d	12.0	0.0	0.0	0.0	0.0	0.0	0.0	0.0	0.0	0.0	27.0	18.0	0.0	0.0
f888d91bad20670ba7f1eeecfcd31a40	11.0	0.0	0.0	0.0	0.0	0.0	9.0	0.0	0.0	0.0	23.0	14.0	0.0	0.0
e56bb914617f3fc68b105288f79a2eb4	0.0	57.0	0.0	0.0	0.0	0.0	0.0	0.0	0.0	0.0	0.0	0.0	0.0	0.0
79c49e189ae707db300cac94c6bf540f	0.0	46.0	0.0	11.0	0.0	0.0	0.0	0.0	0.0	0.0	0.0	0.0	0.0	0.0
9a33e27ab678e68adcffeadf645778c5	0.0	38.0	19.0	0.0	0.0	0.0	0.0	0.0	0.0	0.0	0.0	0.0	0.0	0.0
ce72168fbf5e3e014ce3bb524e664041	0.0	36.0	0.0	21.0	0.0	0.0	0.0	0.0	0.0	0.0	0.0	0.0	0.0	0.0
ac826c4a947a02b279867002cf83d56d	0.0	33.0	12.0	12.0	0.0	0.0	0.0	0.0	0.0	0.0	0.0	0.0	0.0	0.0
918ea954339d229e66f7116d095dce2c	0.0	30.0	13.0	0.0	0.0	0.0	14.0	0.0	0.0	0.0	0.0	0.0	0.0	0.0
e5a24a227b11359b23ee950caa1ac776	0.0	22.0	15.0	15.0	0.0	5.0	0.0	0.0	0.0	0.0	0.0	0.0	0.0	0.0
6945d94103ada823c2811f2b81c56ba0	0.0	0.0	0.0	57.0	0.0	0.0	0.0	0.0	0.0	0.0	0.0	0.0	0.0	0.0
90db6d233a33b6db59e3a8cb3b9b0120	0.0	0.0	0.0	0.0	0.0	0.0	32.0	0.0	0.0	25.0	0.0	0.0	0.0	0.0
0969bc99ad073cd087e0857e57c20c18	0.0	0.0	0.0	0.0	0.0	0.0	0.0	14.0	24.0	19.0	0.0	0.0	0.0	0.0
4cb756ec0ea24abc1c6fb0551378566e	0.0	0.0	0.0	0.0	0.0	0.0	0.0	0.0	57.0	0.0	0.0	0.0	0.0	0.0
2bd75e53d48ac996a3774448d28745bb	0.0	0.0	0.0	0.0	0.0	0.0	0.0	0.0	57.0	0.0	0.0	0.0	0.0	0.0
89f1ecc993ca206daba83844424f35aa	0.0	0.0	0.0	0.0	0.0	0.0	0.0	0.0	57.0	0.0	0.0	0.0	0.0	0.0
8ef2dc359f5b2023e470a760141492e7	0.0	0.0	0.0	0.0	0.0	0.0	0.0	0.0	57.0	0.0	0.0	0.0	0.0	0.0
32ba6de1a90e72f93e2ed5145741e007	0.0	0.0	0.0	0.0	0.0	0.0	0.0	0.0	0.0	0.0	0.0	19.0	38.0	0.0
9cf24ad9887eff6ca510f3629e38c25a	11.0	0.0	0.0	0.0	0.0	0.0	9.0	0.0	0.0	0.0	36.0	0.0	0.0	0.0
e5a8a34ac5b27a6516d9d564a646c6c2	0.0	56.0	0.0	0.0	0.0	0.0	0.0	0.0	0.0	0.0	0.0	0.0	0.0	0.0
ad1a5678434a190d1f53e6b8363bb5b1	0.0	30.0	16.0	10.0	0.0	0.0	0.0	0.0	0.0	0.0	0.0	0.0	0.0	0.0
8dad0c1c5161fadae000eb16491dd5b1	0.0	27.0	12.0	10.0	0.0	0.0	7.0	0.0	0.0	0.0	0.0	0.0	0.0	0.0
2c32110719f7d792854a239ac426a5fd	0.0	24.0	0.0	20.0	0.0	0.0	12.0	0.0	0.0	0.0	0.0	0.0	0.0	0.0
4483f869be0838ec1f160f254d720d7d	0.0	17.0	22.0	17.0	0.0	0.0	0.0	0.0	0.0	0.0	0.0	0.0	0.0	0.0
876b81ac207219d09733f203834b91b4	0.0	16.0	13.0	4.0	0.0	0.0	0.0	0.0	8.0	0.0	9.0	0.0	6.0	0.0
ed177737a3371ad479c0e08e3a4bea00	0.0	0.0	0.0	56.0	0.0	0.0	0.0	0.0	0.0	0.0	0.0	0.0	0.0	0.0
9ce72469885fe81ee26ff6163d7e835d	0.0	0.0	0.0	0.0	0.0	0.0	9.0	30.0	0.0	0.0	0.0	0.0	17.0	0.0
ec6d7720a567783ce36f5b4cb55ba243	0.0	0.0	0.0	0.0	0.0	0.0	0.0	0.0	56.0	0.0	0.0	0.0	0.0	0.0
3319b5f314e4f6ed69baba36d826fdde	0.0	0.0	0.0	0.0	0.0	0.0	0.0	0.0	56.0	0.0	0.0	0.0	0.0	0.0
186d0654d798385d8eb82958f4d049d3	0.0	0.0	0.0	0.0	0.0	0.0	0.0	0.0	56.0	0.0	0.0	0.0	0.0	0.0
4e9c34253aea88c40ae66daf9db12221	0.0	0.0	0.0	0.0	0.0	0.0	0.0	0.0	24.0	32.0	0.0	0.0	0.0	0.0
ebd5144c34cae7bbc09285631d8188f1	0.0	36.0	19.0	0.0	0.0	0.0	0.0	0.0	0.0	0.0	0.0	0.0	0.0	0.0
da1f16923f026a53418b194806d791a4	0.0	27.0	13.0	15.0	0.0	0.0	0.0	0.0	0.0	0.0	0.0	0.0	0.0	0.0
2c4f634407889b0598484538486e4f39	0.0	23.0	0.0	21.0	0.0	11.0	0.0	0.0	0.0	0.0	0.0	0.0	0.0	0.0
5b9a650710e7f198e4be4a316a0ddfed	0.0	0.0	55.0	0.0	0.0	0.0	0.0	0.0	0.0	0.0	0.0	0.0	0.0	0.0
61d96b86c674ec6276984c9be7a81efc	0.0	0.0	0.0	0.0	55.0	0.0	0.0	0.0	0.0	0.0	0.0	0.0	0.0	0.0
2f00d0f988d61ee8862a84ac7bb82b55	0.0	0.0	0.0	0.0	0.0	55.0	0.0	0.0	0.0	0.0	0.0	0.0	0.0	0.0
088bc2e5228101932e94ad30c2f7b3ec	0.0	0.0	0.0	0.0	0.0	15.0	0.0	0.0	0.0	0.0	22.0	6.0	12.0	0.0
57c5ddf2c3e4ab7ef19f3aace20a0cf5	0.0	0.0	0.0	0.0	0.0	0.0	38.0	0.0	11.0	0.0	6.0	0.0	0.0	0.0
26c8b60072b16c06c645529e4f838e9f	0.0	0.0	0.0	0.0	0.0	0.0	0.0	0.0	55.0	0.0	0.0	0.0	0.0	0.0
070fc272903ae7ea02e3a26448029004	0.0	0.0	0.0	0.0	0.0	0.0	0.0	0.0	55.0	0.0	0.0	0.0	0.0	0.0
0a614db7734bed5fcde820a51fbae094	0.0	0.0	0.0	0.0	0.0	0.0	0.0	0.0	55.0	0.0	0.0	0.0	0.0	0.0
2d01d04d66396d050d5b6d252a43531d	0.0	0.0	0.0	0.0	0.0	0.0	0.0	0.0	45.0	10.0	0.0	0.0	0.0	0.0
7867e91f25046facbfb2a4b80f71d200	0.0	0.0	0.0	0.0	0.0	0.0	0.0	0.0	37.0	18.0	0.0	0.0	0.0	0.0
a1e8fa809b56df27637499c27b93fc46	16.0	0.0	0.0	0.0	0.0	0.0	26.0	0.0	0.0	0.0	0.0	12.0	0.0	0.0
47b044e0190a4ae1e85d51a971527e1f	0.0	54.0	0.0	0.0	0.0	0.0	0.0	0.0	0.0	0.0	0.0	0.0	0.0	0.0
de62ce36cc9535898769812313168bca	0.0	54.0	0.0	0.0	0.0	0.0	0.0	0.0	0.0	0.0	0.0	0.0	0.0	0.0
9785251a62c6a93e91793642068bdf66	0.0	32.0	22.0	0.0	0.0	0.0	0.0	0.0	0.0	0.0	0.0	0.0	0.0	0.0
5d2c9965718d1254c00a642f570eb604	0.0	20.0	16.0	16.0	0.0	0.0	0.0	0.0	0.0	0.0	0.0	0.0	2.0	0.0
ac8875b881d40ba97fea78ed76b19171	0.0	7.0	0.0	8.0	0.0	0.0	24.0	15.0	0.0	0.0	0.0	0.0	0.0	0.0
71bcdc484096ad3cc79612519c3285c6	0.0	0.0	34.0	20.0	0.0	0.0	0.0	0.0	0.0	0.0	0.0	0.0	0.0	0.0
0eb614e2451c8e46b20c2543a31a3c5e	0.0	0.0	0.0	0.0	0.0	0.0	0.0	13.0	22.0	19.0	0.0	0.0	0.0	0.0
849b0d6a65ddb6493cf5bbf1e320e25e	0.0	0.0	0.0	0.0	0.0	0.0	0.0	0.0	54.0	0.0	0.0	0.0	0.0	0.0
a5b9c91cd57937870aeb2c4aa0a10f21	0.0	0.0	0.0	0.0	0.0	0.0	0.0	0.0	54.0	0.0	0.0	0.0	0.0	0.0
3d49fcdd3c81d71847ae6539731de560	0.0	0.0	0.0	0.0	0.0	0.0	0.0	0.0	54.0	0.0	0.0	0.0	0.0	0.0
38eb18bdb8fc24ba2666bc99f04719ba	0.0	53.0	0.0	0.0	0.0	0.0	0.0	0.0	0.0	0.0	0.0	0.0	0.0	0.0
1ac5ffb8ab7695bbf0d53d5b670b291b	0.0	33.0	0.0	20.0	0.0	0.0	0.0	0.0	0.0	0.0	0.0	0.0	0.0	0.0
0b973aa57c7bdce18f3ea59405fe0d73	0.0	29.0	0.0	0.0	0.0	0.0	0.0	0.0	24.0	0.0	0.0	0.0	0.0	0.0
6a73ff6da66246b05ba9821293a224a0	0.0	27.0	0.0	26.0	0.0	0.0	0.0	0.0	0.0	0.0	0.0	0.0	0.0	0.0
12843593fb0df551e683b8c8a4ce6531	0.0	24.0	10.0	19.0	0.0	0.0	0.0	0.0	0.0	0.0	0.0	0.0	0.0	0.0
b3ec5bb8feef18d17028da683f6cb1cb	0.0	22.0	16.0	15.0	0.0	0.0	0.0	0.0	0.0	0.0	0.0	0.0	0.0	0.0
63543c460c52a2c95dbfcabcf59457e5	0.0	20.0	11.0	0.0	0.0	0.0	0.0	0.0	22.0	0.0	0.0	0.0	0.0	0.0
401737046ef9a02d23fc8fef9b37ab84	0.0	16.0	14.0	0.0	0.0	0.0	10.0	13.0	0.0	0.0	0.0	0.0	0.0	0.0
87bab316a549839ca18d38a885d46a13	0.0	0.0	24.0	0.0	0.0	0.0	0.0	0.0	0.0	0.0	29.0	0.0	0.0	0.0
42f9a719a6a351c76723d5c870cf4e09	0.0	0.0	0.0	12.0	0.0	28.0	0.0	0.0	0.0	0.0	0.0	13.0	0.0	0.0
b18f1f84920beb1f900033dc1c693d65	0.0	0.0	0.0	0.0	0.0	0.0	28.0	25.0	0.0	0.0	0.0	0.0	0.0	0.0
1e6654f887bae772df119fbc75958b8f	0.0	0.0	0.0	0.0	0.0	0.0	0.0	0.0	53.0	0.0	0.0	0.0	0.0	0.0
309ce21a343e2e4ccb11b441b93ef17f	0.0	0.0	0.0	0.0	0.0	0.0	0.0	0.0	53.0	0.0	0.0	0.0	0.0	0.0
b05de1c33dd8ab164fdccddd170a0560	0.0	0.0	0.0	0.0	0.0	0.0	0.0	0.0	24.0	29.0	0.0	0.0	0.0	0.0
e4304c9496921fcf8a88c1ef30dfd0eb	13.0	0.0	0.0	0.0	0.0	22.0	0.0	0.0	0.0	0.0	17.0	0.0	0.0	0.0
b8cd22e81b4cfb2c2a2ee02bca88492f	0.0	52.0	0.0	0.0	0.0	0.0	0.0	0.0	0.0	0.0	0.0	0.0	0.0	0.0
b9ed3b466563cb6b64bd9a2b86bb20e9	0.0	36.0	0.0	0.0	0.0	16.0	0.0	0.0	0.0	0.0	0.0	0.0	0.0	0.0
cbba34799497be98a39395794340fc6a	0.0	35.0	0.0	0.0	0.0	0.0	0.0	17.0	0.0	0.0	0.0	0.0	0.0	0.0
5ccdc3c4f52d65912ffd3afb34b4fe26	0.0	35.0	0.0	17.0	0.0	0.0	0.0	0.0	0.0	0.0	0.0	0.0	0.0	0.0
0cd8acaf21d7292540e4c9e84cb40e6b	0.0	35.0	17.0	0.0	0.0	0.0	0.0	0.0	0.0	0.0	0.0	0.0	0.0	0.0
92c76bea3e6b4c9dfb510226e54815fb	0.0	34.0	0.0	18.0	0.0	0.0	0.0	0.0	0.0	0.0	0.0	0.0	0.0	0.0
dfb0757e032a5b93e20f9dce17c62a3e	0.0	30.0	0.0	22.0	0.0	0.0	0.0	0.0	0.0	0.0	0.0	0.0	0.0	0.0
8b91e95fc7649cbb43ecf979740fd816	0.0	0.0	0.0	0.0	0.0	0.0	0.0	0.0	40.0	12.0	0.0	0.0	0.0	0.0
92d3eb99a9f086d659e5683dd52dd0d1	0.0	0.0	0.0	0.0	0.0	0.0	0.0	0.0	0.0	0.0	52.0	0.0	0.0	0.0
e2b58e4fe453a8e5b26795a775c3a713	0.0	0.0	0.0	0.0	0.0	0.0	0.0	0.0	0.0	0.0	0.0	28.0	24.0	0.0
40839b1d3d50c55fd3302f1a520b1984	0.0	51.0	0.0	0.0	0.0	0.0	0.0	0.0	0.0	0.0	0.0	0.0	0.0	0.0
b965243d7f12d471bae431c2f4184d6b	0.0	51.0	0.0	0.0	0.0	0.0	0.0	0.0	0.0	0.0	0.0	0.0	0.0	0.0
8a8895d160b2fda424ad5446e9bf8f4e	0.0	0.0	0.0	11.0	0.0	0.0	0.0	0.0	40.0	0.0	0.0	0.0	0.0	0.0
dd675320dd3d457b3e271d13b4a60dcf	0.0	0.0	0.0	0.0	0.0	0.0	0.0	0.0	51.0	0.0	0.0	0.0	0.0	0.0
32181b006051d0c53a829c211710b508	0.0	0.0	0.0	0.0	0.0	0.0	0.0	0.0	51.0	0.0	0.0	0.0	0.0	0.0
6ebbc25491053ea76666ce2cc074fc3e	0.0	0.0	0.0	0.0	0.0	0.0	0.0	0.0	51.0	0.0	0.0	0.0	0.0	0.0
c01d4a999753cd0e4f0e185ce838fa4a	0.0	0.0	0.0	0.0	0.0	0.0	0.0	0.0	38.0	13.0	0.0	0.0	0.0	0.0
b1784514a68399b897146cf688f3c22d	0.0	0.0	0.0	0.0	0.0	0.0	0.0	0.0	0.0	0.0	0.0	21.0	30.0	0.0
a5b5dbcca99ca3ba17b44d4026501eea	15.0	4.0	7.0	13.0	0.0	0.0	0.0	0.0	0.0	0.0	4.0	0.0	7.0	0.0
47b21eb962cf4d9fdefec484c7c45aec	0.0	34.0	0.0	16.0	0.0	0.0	0.0	0.0	0.0	0.0	0.0	0.0	0.0	0.0
92bb3dd6d26104536193e526e1ca38da	0.0	32.0	0.0	18.0	0.0	0.0	0.0	0.0	0.0	0.0	0.0	0.0	0.0	0.0
5aa06271cda61e50c94de3eb995f00b9	0.0	23.0	18.0	9.0	0.0	0.0	0.0	0.0	0.0	0.0	0.0	0.0	0.0	0.0
99a6ff7d9d475d02f0c2f93c46ae765e	0.0	17.0	12.0	21.0	0.0	0.0	0.0	0.0	0.0	0.0	0.0	0.0	0.0	0.0
306d6eec212185710bef284b13a0e997	0.0	0.0	0.0	0.0	0.0	0.0	0.0	0.0	50.0	0.0	0.0	0.0	0.0	0.0
edc21c81d006f606ea024552d60526ac	0.0	0.0	0.0	0.0	0.0	0.0	0.0	0.0	50.0	0.0	0.0	0.0	0.0	0.0
301ca05e6677d58e8e5d62e9028e7131	0.0	0.0	0.0	0.0	0.0	0.0	0.0	0.0	50.0	0.0	0.0	0.0	0.0	0.0
dc17a99d06059905b9fe7239b0b6072a	0.0	0.0	0.0	0.0	0.0	0.0	0.0	0.0	50.0	0.0	0.0	0.0	0.0	0.0
570d8814b3ec9bdebcddb166aac22f06	0.0	0.0	0.0	0.0	0.0	0.0	0.0	0.0	0.0	50.0	0.0	0.0	0.0	0.0
f174710e39f2bc85585ff6abcca3bb8d	0.0	49.0	0.0	0.0	0.0	0.0	0.0	0.0	0.0	0.0	0.0	0.0	0.0	0.0
ff596e25490a25a29dab024f137de54d	0.0	34.0	15.0	0.0	0.0	0.0	0.0	0.0	0.0	0.0	0.0	0.0	0.0	0.0
0bf55614093f148c13c1ee118c0daf0c	0.0	32.0	0.0	17.0	0.0	0.0	0.0	0.0	0.0	0.0	0.0	0.0	0.0	0.0
ab707e337730a5692b7b3ee9322d6ea1	0.0	31.0	0.0	18.0	0.0	0.0	0.0	0.0	0.0	0.0	0.0	0.0	0.0	0.0
eec0aaed4fd4ad45bc2a6e611d30047b	0.0	23.0	9.0	17.0	0.0	0.0	0.0	0.0	0.0	0.0	0.0	0.0	0.0	0.0
36e7c37c4525fca54ea0202f2382d995	0.0	21.0	14.0	14.0	0.0	0.0	0.0	0.0	0.0	0.0	0.0	0.0	0.0	0.0
08ef88d441539434a8c1d377cf9670b8	0.0	21.0	18.0	10.0	0.0	0.0	0.0	0.0	0.0	0.0	0.0	0.0	0.0	0.0
279d14ec944b0dbd3dadce663353b028	0.0	19.0	0.0	9.0	0.0	0.0	0.0	0.0	18.0	0.0	0.0	0.0	3.0	0.0
7fc0ce0be4f56c3472daebd134a2abf7	0.0	14.0	9.0	13.0	0.0	0.0	0.0	0.0	13.0	0.0	0.0	0.0	0.0	0.0
8e1b760d3b5601514264d1ed406eb693	0.0	0.0	0.0	0.0	0.0	0.0	0.0	49.0	0.0	0.0	0.0	0.0	0.0	0.0
cb63d14a1996b7e6436643e034231939	0.0	0.0	0.0	0.0	0.0	0.0	0.0	0.0	49.0	0.0	0.0	0.0	0.0	0.0
b674a1eaef6c2e57abc4304d24dd5948	0.0	0.0	0.0	0.0	0.0	0.0	0.0	0.0	49.0	0.0	0.0	0.0	0.0	0.0
156b17643f8da261e1220bc51e6c3b26	0.0	0.0	0.0	0.0	0.0	0.0	0.0	0.0	49.0	0.0	0.0	0.0	0.0	0.0
8da648919aa2af8037650e06ab35849e	0.0	0.0	0.0	0.0	0.0	0.0	0.0	0.0	49.0	0.0	0.0	0.0	0.0	0.0
acd8c84742f4192addd7ec40827b4506	0.0	0.0	0.0	0.0	0.0	0.0	0.0	0.0	49.0	0.0	0.0	0.0	0.0	0.0
d9fada36ba52a8d5a42106b08d4354c0	0.0	0.0	0.0	0.0	0.0	0.0	0.0	0.0	10.0	39.0	0.0	0.0	0.0	0.0
1ef09e0f9fd2dc4eb876af0d3b453c57	0.0	0.0	0.0	0.0	0.0	0.0	0.0	0.0	0.0	49.0	0.0	0.0	0.0	0.0
8a59efbf4b0608c3604eed13b9593142	0.0	48.0	0.0	0.0	0.0	0.0	0.0	0.0	0.0	0.0	0.0	0.0	0.0	0.0
4ea907f1ee2b2c119ced3414b8eb8396	0.0	32.0	0.0	16.0	0.0	0.0	0.0	0.0	0.0	0.0	0.0	0.0	0.0	0.0
c67fa1e9d3e2c645133df3977cec83c1	0.0	32.0	0.0	16.0	0.0	0.0	0.0	0.0	0.0	0.0	0.0	0.0	0.0	0.0
2bc6b13ef6a2cef2b40e748afa53b813	0.0	32.0	0.0	16.0	0.0	0.0	0.0	0.0	0.0	0.0	0.0	0.0	0.0	0.0
d0899992f60808f2fef9f1ca53df899d	0.0	30.0	0.0	18.0	0.0	0.0	0.0	0.0	0.0	0.0	0.0	0.0	0.0	0.0
3ece7d1ce7d4b0942ae7eba7f3cf1903	0.0	14.0	0.0	4.0	0.0	0.0	22.0	0.0	0.0	0.0	8.0	0.0	0.0	0.0
30d64ffa1204046993838d9681f3b416	0.0	0.0	15.0	9.0	0.0	0.0	0.0	0.0	0.0	0.0	9.0	10.0	5.0	0.0
bb503d3199a1c1954772cb7ff61f00f6	0.0	0.0	0.0	0.0	0.0	0.0	0.0	38.0	0.0	10.0	0.0	0.0	0.0	0.0
e8e135298bdc3984e7752cfa88df74e7	0.0	0.0	0.0	0.0	0.0	0.0	0.0	0.0	48.0	0.0	0.0	0.0	0.0	0.0
8fcccc1c1e1e5e8980e6cbff26f6432c	0.0	0.0	0.0	0.0	0.0	0.0	0.0	0.0	48.0	0.0	0.0	0.0	0.0	0.0
4606e5a8b45cd256c0e043c41198e57e	0.0	47.0	0.0	0.0	0.0	0.0	0.0	0.0	0.0	0.0	0.0	0.0	0.0	0.0
7bc70d3a6e756853350b0b6a3f59848d	0.0	47.0	0.0	0.0	0.0	0.0	0.0	0.0	0.0	0.0	0.0	0.0	0.0	0.0
cb18c549f989b7f6ab08ed416698beb0	0.0	24.0	11.0	12.0	0.0	0.0	0.0	0.0	0.0	0.0	0.0	0.0	0.0	0.0
16264f57467997c722ac84dcaae565a3	0.0	21.0	4.0	8.0	0.0	0.0	14.0	0.0	0.0	0.0	0.0	0.0	0.0	0.0
48db1f196c5ec6b68bf2ad42bc849769	0.0	16.0	8.0	23.0	0.0	0.0	0.0	0.0	0.0	0.0	0.0	0.0	0.0	0.0
355cfbd49b27a4bb84d54f98aa1905c0	0.0	0.0	0.0	0.0	0.0	0.0	9.0	0.0	30.0	8.0	0.0	0.0	0.0	0.0
ae97a7cdcb030bd931696acd8d5df2db	0.0	0.0	0.0	0.0	0.0	0.0	0.0	0.0	47.0	0.0	0.0	0.0	0.0	0.0
b0bd50e5e9c8472f08a66999e93a48d9	0.0	0.0	0.0	0.0	0.0	0.0	0.0	0.0	47.0	0.0	0.0	0.0	0.0	0.0
bd54cfb7422d8948a39b8a8e359901fd	0.0	0.0	0.0	0.0	0.0	0.0	0.0	0.0	47.0	0.0	0.0	0.0	0.0	0.0
49489b8412e4735b780aecda6e2c9fa1	0.0	0.0	0.0	0.0	0.0	0.0	0.0	0.0	28.0	19.0	0.0	0.0	0.0	0.0
65c914641b6484f56b9325fbb2e63ce7	0.0	0.0	0.0	0.0	0.0	0.0	0.0	0.0	25.0	22.0	0.0	0.0	0.0	0.0
cce2a68033a6689230b963cc96a9530c	0.0	46.0	0.0	0.0	0.0	0.0	0.0	0.0	0.0	0.0	0.0	0.0	0.0	0.0
c8df37785236d9856bbf3dceac097be6	0.0	46.0	0.0	0.0	0.0	0.0	0.0	0.0	0.0	0.0	0.0	0.0	0.0	0.0
bd56dc01bd297a6b260efb46e3ee1806	0.0	46.0	0.0	0.0	0.0	0.0	0.0	0.0	0.0	0.0	0.0	0.0	0.0	0.0
752618de8c655033b311788feb2afa4e	0.0	46.0	0.0	0.0	0.0	0.0	0.0	0.0	0.0	0.0	0.0	0.0	0.0	0.0
7c91eba752f2423ffc615aed18342744	0.0	46.0	0.0	0.0	0.0	0.0	0.0	0.0	0.0	0.0	0.0	0.0	0.0	0.0
1d379cd10d0141a4cbdc5d169d25d847	0.0	37.0	0.0	9.0	0.0	0.0	0.0	0.0	0.0	0.0	0.0	0.0	0.0	0.0
ba6759f631da7f1e396aa9d559da00f9	0.0	15.0	0.0	0.0	0.0	0.0	16.0	15.0	0.0	0.0	0.0	0.0	0.0	0.0
33adddf40d4b173202ce8070166dac4a	0.0	0.0	0.0	0.0	46.0	0.0	0.0	0.0	0.0	0.0	0.0	0.0	0.0	0.0
6a7c3ab4e8ff002fe14491a79f839536	0.0	0.0	0.0	0.0	0.0	0.0	9.0	18.0	0.0	19.0	0.0	0.0	0.0	0.0
4efcf059dd4624bc3296c84c0756b749	0.0	0.0	0.0	0.0	0.0	0.0	0.0	0.0	46.0	0.0	0.0	0.0	0.0	0.0
a7215022a361f1aecf7c1f98c3653902	0.0	0.0	0.0	0.0	0.0	0.0	0.0	0.0	46.0	0.0	0.0	0.0	0.0	0.0
5722b8a8df241260daca18251ec9e853	0.0	0.0	0.0	0.0	0.0	0.0	0.0	0.0	46.0	0.0	0.0	0.0	0.0	0.0
02b5977c21ceffcbe7f5263d650b933d	0.0	0.0	0.0	0.0	0.0	0.0	0.0	0.0	35.0	11.0	0.0	0.0	0.0	0.0
ea0a0ead04c6957a36da07d0dea2dca1	17.0	0.0	0.0	0.0	0.0	0.0	0.0	0.0	0.0	0.0	28.0	0.0	0.0	0.0
5580f3772d40d551c93350308204f10f	0.0	45.0	0.0	0.0	0.0	0.0	0.0	0.0	0.0	0.0	0.0	0.0	0.0	0.0
3d17bfd8b300570cc88874e52f6fb63f	0.0	45.0	0.0	0.0	0.0	0.0	0.0	0.0	0.0	0.0	0.0	0.0	0.0	0.0
ca6c2b3b469c08212142e8821c65882a	0.0	45.0	0.0	0.0	0.0	0.0	0.0	0.0	0.0	0.0	0.0	0.0	0.0	0.0
fe768443c9b0ee4e2b95d85eb68db3ae	0.0	45.0	0.0	0.0	0.0	0.0	0.0	0.0	0.0	0.0	0.0	0.0	0.0	0.0
4a57f4d105e888560b56093316510c9c	0.0	45.0	0.0	0.0	0.0	0.0	0.0	0.0	0.0	0.0	0.0	0.0	0.0	0.0
ceb7960ef4a99cbdd96604c6d6254a76	0.0	36.0	0.0	0.0	0.0	0.0	9.0	0.0	0.0	0.0	0.0	0.0	0.0	0.0
19ebf8fc76849cd406bf13dcfca70fa1	0.0	31.0	14.0	0.0	0.0	0.0	0.0	0.0	0.0	0.0	0.0	0.0	0.0	0.0
ca8df77d95337d048d425cd6d2002444	0.0	31.0	0.0	14.0	0.0	0.0	0.0	0.0	0.0	0.0	0.0	0.0	0.0	0.0
38b5e7e22e1b9b0e026240c9f40d9b3e	0.0	30.0	15.0	0.0	0.0	0.0	0.0	0.0	0.0	0.0	0.0	0.0	0.0	0.0
0e4cad379666cbaed3deef593cd41d55	0.0	19.0	9.0	17.0	0.0	0.0	0.0	0.0	0.0	0.0	0.0	0.0	0.0	0.0
e98465c4c0b9ee88ab0cb46f5ee40523	0.0	0.0	45.0	0.0	0.0	0.0	0.0	0.0	0.0	0.0	0.0	0.0	0.0	0.0
e8ff036989b9003977bb99a178e3f309	0.0	0.0	45.0	0.0	0.0	0.0	0.0	0.0	0.0	0.0	0.0	0.0	0.0	0.0
3d075260fe5b468fed63154a1080f15c	0.0	0.0	0.0	45.0	0.0	0.0	0.0	0.0	0.0	0.0	0.0	0.0	0.0	0.0
8c4c999c1b37d6925f4e45a5b98472e4	0.0	0.0	0.0	45.0	0.0	0.0	0.0	0.0	0.0	0.0	0.0	0.0	0.0	0.0
0de2767a3e50ecef68a9e2422836ba0c	0.0	0.0	0.0	15.0	0.0	30.0	0.0	0.0	0.0	0.0	0.0	0.0	0.0	0.0
f983e30ff9f8a213f8ad1a99212d94be	0.0	0.0	0.0	0.0	45.0	0.0	0.0	0.0	0.0	0.0	0.0	0.0	0.0	0.0
69e246e02e661768bf784bb8798f5ad4	0.0	0.0	0.0	0.0	0.0	45.0	0.0	0.0	0.0	0.0	0.0	0.0	0.0	0.0
29254eec7349e5fc07b1931919e19d1a	0.0	0.0	0.0	0.0	0.0	0.0	0.0	45.0	0.0	0.0	0.0	0.0	0.0	0.0
1878c877726ea800913b57df800be272	0.0	0.0	0.0	0.0	0.0	0.0	0.0	0.0	45.0	0.0	0.0	0.0	0.0	0.0
72ef7c7b728d294c29f0d2dbc4ba4dab	0.0	0.0	0.0	0.0	0.0	0.0	0.0	0.0	45.0	0.0	0.0	0.0	0.0	0.0
ead26be4a0163584b095189733c03d44	0.0	0.0	0.0	0.0	0.0	0.0	0.0	0.0	45.0	0.0	0.0	0.0	0.0	0.0
45bc4b1f7e3dd1333df677fd3e370f61	0.0	0.0	0.0	0.0	0.0	0.0	0.0	0.0	45.0	0.0	0.0	0.0	0.0	0.0
8bc601dcb7b65c470ddf1ad2d2842fe2	0.0	0.0	0.0	0.0	0.0	0.0	0.0	0.0	45.0	0.0	0.0	0.0	0.0	0.0
9081d07933e02e7c60eabed5e45b6873	0.0	0.0	0.0	0.0	0.0	0.0	0.0	0.0	45.0	0.0	0.0	0.0	0.0	0.0
226147a8ae79bc352f677d21f2d12431	0.0	0.0	0.0	0.0	0.0	0.0	0.0	0.0	39.0	6.0	0.0	0.0	0.0	0.0
69fceb31f02e166779b531dadb9b71c1	0.0	0.0	0.0	0.0	0.0	0.0	0.0	0.0	37.0	8.0	0.0	0.0	0.0	0.0
88cf13bba1da635d18a1d1cedad86082	0.0	0.0	0.0	0.0	0.0	0.0	0.0	0.0	0.0	45.0	0.0	0.0	0.0	0.0
c76bccd2d3e5b0865a0fe67e1348fcc3	0.0	44.0	0.0	0.0	0.0	0.0	0.0	0.0	0.0	0.0	0.0	0.0	0.0	0.0
3e5cb68356aeac941d25db9cab6a9d3d	0.0	29.0	0.0	15.0	0.0	0.0	0.0	0.0	0.0	0.0	0.0	0.0	0.0	0.0
6b4e03645f2bad59dc8cebb9aee76394	0.0	25.0	19.0	0.0	0.0	0.0	0.0	0.0	0.0	0.0	0.0	0.0	0.0	0.0
06d1ffdc854cf06cc92499e05f90de8a	0.0	18.0	21.0	0.0	0.0	0.0	0.0	0.0	0.0	0.0	0.0	0.0	5.0	0.0
0e2098e9ad6f2c074f933979c885f68a	0.0	0.0	13.0	31.0	0.0	0.0	0.0	0.0	0.0	0.0	0.0	0.0	0.0	0.0
e1cbc3cee0ba0b586ff885b119451b1a	0.0	0.0	0.0	44.0	0.0	0.0	0.0	0.0	0.0	0.0	0.0	0.0	0.0	0.0
54f9d45ebe3c73f54132b2f1eb066039	0.0	0.0	0.0	0.0	0.0	0.0	22.0	22.0	0.0	0.0	0.0	0.0	0.0	0.0
f5dceaa232a9d10abfab64ad8fc14b0a	0.0	0.0	0.0	0.0	0.0	0.0	0.0	0.0	44.0	0.0	0.0	0.0	0.0	0.0
f671cd8eb68392b28f2ea0dfa4cc194b	0.0	0.0	0.0	0.0	0.0	0.0	0.0	0.0	44.0	0.0	0.0	0.0	0.0	0.0
d4212f58a340965b3f711bd1bdbd28e8	0.0	0.0	0.0	0.0	0.0	0.0	0.0	0.0	44.0	0.0	0.0	0.0	0.0	0.0
e5584a38336b44ee9c9c098a6a7864a2	0.0	0.0	0.0	0.0	0.0	0.0	0.0	0.0	44.0	0.0	0.0	0.0	0.0	0.0
53fad28d1b848930e35f2c2ebcc7d4ef	0.0	0.0	0.0	0.0	0.0	0.0	0.0	0.0	44.0	0.0	0.0	0.0	0.0	0.0
edfd9fe7b9fc7af35fba481211003097	0.0	0.0	0.0	0.0	0.0	0.0	0.0	0.0	44.0	0.0	0.0	0.0	0.0	0.0
3d69e2f84a880e7bf9b2123f9a806acd	0.0	0.0	0.0	0.0	0.0	0.0	0.0	0.0	0.0	44.0	0.0	0.0	0.0	0.0
1313b1c9e9a4988c70898ca07f37c7fe	9.0	10.0	6.0	0.0	0.0	0.0	0.0	0.0	0.0	0.0	0.0	7.0	11.0	0.0
27d1b866883a2cc4b5749097f6ce3d7e	0.0	43.0	0.0	0.0	0.0	0.0	0.0	0.0	0.0	0.0	0.0	0.0	0.0	0.0
39726629611d3912ae41062c03f0cf97	0.0	43.0	0.0	0.0	0.0	0.0	0.0	0.0	0.0	0.0	0.0	0.0	0.0	0.0
2156b77c163ac6bbc4ea9b72490e8985	0.0	43.0	0.0	0.0	0.0	0.0	0.0	0.0	0.0	0.0	0.0	0.0	0.0	0.0
6b9141106e764b5efbfa24fdb03b8b79	0.0	31.0	5.0	7.0	0.0	0.0	0.0	0.0	0.0	0.0	0.0	0.0	0.0	0.0
2e1969d6a15b6a3ed55240cac89a77f8	0.0	31.0	12.0	0.0	0.0	0.0	0.0	0.0	0.0	0.0	0.0	0.0	0.0	0.0
162a7d89d905ba12e46574700439b980	0.0	27.0	0.0	16.0	0.0	0.0	0.0	0.0	0.0	0.0	0.0	0.0	0.0	0.0
5a664d985f3dcc955bb7dcad2a5b91eb	0.0	27.0	16.0	0.0	0.0	0.0	0.0	0.0	0.0	0.0	0.0	0.0	0.0	0.0
3d482dcb010eacc5fb4c9f0325f2d908	0.0	24.0	0.0	0.0	0.0	0.0	0.0	0.0	0.0	0.0	10.0	0.0	9.0	0.0
9c998be17149f21bb94bf3bf5130a2a1	0.0	15.0	12.0	16.0	0.0	0.0	0.0	0.0	0.0	0.0	0.0	0.0	0.0	0.0
e04bf9bca3b5f7fe8bb6e05777338b7e	0.0	0.0	4.0	0.0	0.0	0.0	0.0	0.0	39.0	0.0	0.0	0.0	0.0	0.0
f2eff3a47f180afdd2c546f63588c3b2	0.0	0.0	0.0	0.0	0.0	0.0	15.0	28.0	0.0	0.0	0.0	0.0	0.0	0.0
ba80298023386286f71f3c1bfa75ed8a	0.0	0.0	0.0	0.0	0.0	0.0	0.0	10.0	33.0	0.0	0.0	0.0	0.0	0.0
22176c6ef2be76fad9e45aa024aaa8ab	0.0	0.0	0.0	0.0	0.0	0.0	0.0	0.0	43.0	0.0	0.0	0.0	0.0	0.0
c7bcdefe125c80f5a56d1d8f4ac1bdd0	0.0	0.0	0.0	0.0	0.0	0.0	0.0	0.0	43.0	0.0	0.0	0.0	0.0	0.0
a5cd27eb78f1b7c414a41baa6655c5d2	0.0	0.0	0.0	0.0	0.0	0.0	0.0	0.0	43.0	0.0	0.0	0.0	0.0	0.0
011ce27f894fc63df55dcb462941c3f1	14.0	0.0	0.0	0.0	0.0	0.0	0.0	0.0	0.0	0.0	12.0	0.0	16.0	0.0
6ef30ad70950c7994898405da4aa1f2a	0.0	42.0	0.0	0.0	0.0	0.0	0.0	0.0	0.0	0.0	0.0	0.0	0.0	0.0
61ed9644ae561c23f152a3561adaceca	0.0	42.0	0.0	0.0	0.0	0.0	0.0	0.0	0.0	0.0	0.0	0.0	0.0	0.0
1f906f391e9dc1e56e636e4bac62937d	0.0	35.0	0.0	7.0	0.0	0.0	0.0	0.0	0.0	0.0	0.0	0.0	0.0	0.0
e48f0e109e5ddbaa08a3004c2cf4172b	0.0	27.0	15.0	0.0	0.0	0.0	0.0	0.0	0.0	0.0	0.0	0.0	0.0	0.0
f1e3e754059e7ec0180fb5256253ea82	0.0	21.0	21.0	0.0	0.0	0.0	0.0	0.0	0.0	0.0	0.0	0.0	0.0	0.0
e98974c14927237cdeee890c86479e3a	0.0	0.0	0.0	0.0	42.0	0.0	0.0	0.0	0.0	0.0	0.0	0.0	0.0	0.0
29e71c36f2ddedff337716fd2fe8cb96	0.0	0.0	0.0	0.0	0.0	26.0	16.0	0.0	0.0	0.0	0.0	0.0	0.0	0.0
67204202460e53da77f78e860e415f9c	0.0	0.0	0.0	0.0	0.0	0.0	42.0	0.0	0.0	0.0	0.0	0.0	0.0	0.0
4aee55505cab8a81806cccbb5aae1a40	0.0	0.0	0.0	0.0	0.0	0.0	0.0	0.0	42.0	0.0	0.0	0.0	0.0	0.0
e564a15845c40c47c09a28c00d05e88c	0.0	0.0	0.0	0.0	0.0	0.0	0.0	0.0	42.0	0.0	0.0	0.0	0.0	0.0
1b1d9576a5390f3660c0ab3b3a241b2c	0.0	0.0	0.0	0.0	0.0	0.0	0.0	0.0	42.0	0.0	0.0	0.0	0.0	0.0
f781754964ed145b04b9facac570fc02	18.0	0.0	0.0	0.0	0.0	0.0	0.0	0.0	0.0	0.0	12.0	0.0	11.0	0.0
d6f2b3ca8202cecaa473d2b4ce596340	0.0	41.0	0.0	0.0	0.0	0.0	0.0	0.0	0.0	0.0	0.0	0.0	0.0	0.0
d54a397cc3a738a89098c92aea66f12a	0.0	41.0	0.0	0.0	0.0	0.0	0.0	0.0	0.0	0.0	0.0	0.0	0.0	0.0
93fbcb9f788e2456c357d7d7ef6211f6	0.0	27.0	0.0	14.0	0.0	0.0	0.0	0.0	0.0	0.0	0.0	0.0	0.0	0.0
a5f64f6b6dd6888e3f7dc4129bc632a6	0.0	26.0	0.0	15.0	0.0	0.0	0.0	0.0	0.0	0.0	0.0	0.0	0.0	0.0
25b4497ba35af1ad00af77169cc79f52	0.0	26.0	0.0	15.0	0.0	0.0	0.0	0.0	0.0	0.0	0.0	0.0	0.0	0.0
0d34e514b2d0d3a14fbfa27a9717f5ae	0.0	23.0	18.0	0.0	0.0	0.0	0.0	0.0	0.0	0.0	0.0	0.0	0.0	0.0
[truncated: 2,499 more rows]

## Sheet: Illumina - Taxonomy
490f7022ae9936cc74482d629b706226	Bacteria	Proteobacteria	Alphaproteobacteria	Rhodobacterales	Rhodobacteraceae	Rhodobacter
84ea3564fd34c5377c4305b340f0c16f	Bacteria	Proteobacteria	Alphaproteobacteria	Rickettsiales	Pelagibacteraceae
9cfa52be027c8fa57d197b21dd7a958c	Bacteria	Actinobacteria	Actinobacteria	Actinomycetales	ACK-M1
5afc2a9c279a0e72cb96fb88e116f994	Bacteria	Cyanobacteria	Synechococcophycideae	Synechococcales	Synechococcaceae	Synechococcus
ab3c8788d244ad9a77a7a48ae03ad6d3	Bacteria	Verrucomicrobia	[Spartobacteria]	[Chthoniobacterales]	[Chthoniobacteraceae]	CandidatusXiphinematobacter
304a41c1c7d84b9f7049e0cba0f63300	Bacteria	Cyanobacteria	Synechococcophycideae	Synechococcales	Synechococcaceae	Synechococcus
cfb98993000a7864ecd250723d57b8db	Bacteria	Bacteroidetes	Sphingobacteriia	Sphingobacteriales	NS11-12
3f456a18968cea5c5e549e281f0f5808	Bacteria	Actinobacteria	Actinobacteria	Actinomycetales	ACK-M1
81703e7ea9070f5db356c359ddd4731e	Bacteria	Actinobacteria	Actinobacteria	Actinomycetales	ACK-M1
330511b25fce830f4ad4b90a0e70a290	Bacteria	Bacteroidetes	Flavobacteriia	Flavobacteriales	Flavobacteriaceae
5f510cf434513fffae3da23d8a55ced4	Bacteria	Cyanobacteria	Chloroplast	Cryptophyta
b96ea0d3eaa1a062c1e8411c138f7e28	Bacteria	Cyanobacteria	Chloroplast	Stramenopiles
6733f6b277ed40ca5dff3c82728ba9fc	Bacteria	Proteobacteria	Betaproteobacteria	Methylophilales	Methylophilaceae
4d65f65496c3d0238ebf74738245e526	Bacteria	Bacteroidetes	Flavobacteriia	Flavobacteriales	Cryomorphaceae
6267512d7ea98a0da430e5a6f96698e6	Bacteria	Actinobacteria	Actinobacteria	Actinomycetales	ACK-M1
f34cdcd73e535507d29c29b19d01f658	Bacteria	Proteobacteria	Betaproteobacteria	Burkholderiales	Comamonadaceae	Rhodoferax
7737a411e7f276fae1d2c38a6188f723	Bacteria	Proteobacteria	Betaproteobacteria	Burkholderiales	Comamonadaceae	RS62
9f5bf0bf0fa780be0b7ab197316e91c4	Bacteria	Proteobacteria	Betaproteobacteria	Burkholderiales	Oxalobacteraceae	Polynucleobacter
4fecdb809342a4fcf200afffd42ca2e3	Bacteria	Bacteroidetes	Flavobacteriia	Flavobacteriales	Cryomorphaceae	Fluviicola
db87d8c209a9995704ccb38c98e0543e	Bacteria	Actinobacteria	Acidimicrobiia	Acidimicrobiales	C111
01514b1eefaab7c2b75c8a9d0f1c85e6	Bacteria	Cyanobacteria	Chloroplast	Cryptophyta
79882a047a01ea067efc1c77bb2ade6c	Bacteria	Actinobacteria	Thermoleophilia	Solirubrobacterales
087e50a409374f400614f96d9c161f62	Bacteria	Actinobacteria	Acidimicrobiia	Acidimicrobiales	C111
3eeb4a6278652363d350b5391ebeb470	Bacteria	Proteobacteria	Betaproteobacteria	Burkholderiales	Comamonadaceae
fb800d4d7cd0a8e0da07b414fcf21b8c	Bacteria	Bacteroidetes	Cytophagia	Cytophagales	Cyclobacteriaceae
a51911fb468aee7787ca8edf2ad66641	Bacteria	Actinobacteria	Actinobacteria	Actinomycetales	ACK-M1
b632a177daad11d134247ee04ab8b120	Bacteria	Bacteroidetes	[Saprospirae]	[Saprospirales]	Chitinophagaceae	Sediminibacterium
57f316f2b8bb8cd1fcfdfe2c557148f0	Bacteria	Proteobacteria	Betaproteobacteria	Burkholderiales	Comamonadaceae	RS62
25cb02fb17426d878afd69a79572b858	Bacteria	Proteobacteria	Betaproteobacteria	Burkholderiales	Comamonadaceae	Polaromonas
277ffccb015bf789cd6557b264b38610	Bacteria	Actinobacteria	Actinobacteria	Actinomycetales
f698bc60e827ed25fbba1b6bc4745a33	Bacteria	Cyanobacteria	Chloroplast	Stramenopiles
4bd8e846b0a7a6637cd52a50348cdada	Bacteria	Bacteroidetes	Flavobacteriia	Flavobacteriales	Cryomorphaceae
192809e72bf78b432b207e54e8b066cf	Bacteria	Planctomycetes	Planctomycetia	Gemmatales	Gemmataceae
05d385f8260362e624138cae31e3f909	Bacteria	Actinobacteria	Actinobacteria	Actinomycetales
6b94959874b693c3304e68c57cefd287	Bacteria	Actinobacteria	Actinobacteria	Actinomycetales	ACK-M1
8ceae18ee0348d694b1a6f77def3b22e	Bacteria	Proteobacteria	Epsilonproteobacteria	Campylobacterales	Campylobacteraceae	Arcobacter
85d24879ef98292c5c0f93b992f197f1	Bacteria	Actinobacteria	Acidimicrobiia	Acidimicrobiales	C111
705e5a5b929be7a7acfda7721bb4b79c	Bacteria	Proteobacteria	Betaproteobacteria	Burkholderiales	Alcaligenaceae
061c2cebcbacd895f0e1ac79d30dc18b	Bacteria
1b9bc3fe984ec89289cffb01a3a3e8a5	Bacteria	Cyanobacteria	Synechococcophycideae	Synechococcales	Synechococcaceae	Synechococcus
ca527f2b2b745a618c4c486f18a1de58	Bacteria	Actinobacteria	Actinobacteria	Actinomycetales	Mycobacteriaceae	Mycobacterium
dc3835d12dc9edc210bddff9c66bf356	Bacteria	Bacteroidetes	[Saprospirae]	[Saprospirales]	Saprospiraceae	Aquirestis	calciphila
330bfd0f6aa329b6004a231c38608d9f	Bacteria	Proteobacteria	Betaproteobacteria	Burkholderiales	Alcaligenaceae
cd3252d96bdb1efe5fc05bc00a9d9309	Bacteria	Actinobacteria	Actinobacteria	Actinomycetales	ACK-M1
fe7b5b769375b837bb6d4bfa6dee234f	Bacteria	Bacteroidetes	[Saprospirae]	[Saprospirales]	Chitinophagaceae	Sediminibacterium
9737b23542e3ae0dac40d87694aa5ea5	Bacteria	Actinobacteria	Actinobacteria	Actinomycetales
4112eeace57200636aefa80277a9968b	Bacteria	Proteobacteria	Betaproteobacteria	Burkholderiales	Comamonadaceae
0e43a5ae231c465cac40fead7eb4f508	Bacteria	Proteobacteria	Alphaproteobacteria	Sphingomonadales
ace853cd3b53581a90639a4cdf0ff326	Bacteria	Proteobacteria	Gammaproteobacteria	Alteromonadales	Shewanellaceae	Shewanella
e959f2d4b8fd92b6dd19e4244fb46f0a	Bacteria	Proteobacteria	Betaproteobacteria	Burkholderiales	Comamonadaceae	Rhodoferax
bf0fc57d701c5060d650485ca2bca7b0	Bacteria	Cyanobacteria	Chloroplast	Stramenopiles
149722b13ecbe65895965ca5ab16d1cb	Bacteria	Actinobacteria	Thermoleophilia	Gaiellales
9100c673ddb0128f63023d0c6d423792	Bacteria	Proteobacteria	Betaproteobacteria	MWH-UniP1
c4b5b0d584a7b6b6019f42b4eb607d91	Bacteria	Actinobacteria	Actinobacteria	Actinomycetales
7f79adb6f17ca8c8dec3d655e2206dd6	Bacteria	Bacteroidetes	Sphingobacteriia	Sphingobacteriales
af27577de5edb10c09f7fc19b9ca45ca	Bacteria	Proteobacteria	Alphaproteobacteria	Rhodobacterales	Rhodobacteraceae	Rhodobacter
9c253b045234173540111db036e207ba	Bacteria	Planctomycetes	Phycisphaerae	Phycisphaerales
9711a7623ac2b145da2624b49032e793	Bacteria	Proteobacteria	Gammaproteobacteria	Alteromonadales	Alteromonadaceae	HTCC2207
18a735528faa18075b5756ea18638874	Bacteria	Verrucomicrobia	[Spartobacteria]	[Chthoniobacterales]	[Chthoniobacteraceae]	CandidatusXiphinematobacter
9428beb80a1d1a2031c5b1f67560ceb0	Bacteria	Cyanobacteria	Chloroplast	Stramenopiles
3fcfca31f74f1fc0ec1337c4694b7bed	Bacteria	Bacteroidetes	Sphingobacteriia	Sphingobacteriales	Sphingobacteriaceae
76b3702714054274614f58000038c1be	Bacteria	Planctomycetes	Phycisphaerae	Phycisphaerales
01b83ab7847cd02b3473612a31395619	Bacteria	Cyanobacteria	Chloroplast	Chlorophyta
96cdc2598420800428c9781e8fd9819e	Bacteria	Bacteroidetes	Flavobacteriia	Flavobacteriales	Cryomorphaceae	Fluviicola
2daba14542270de8af1a229f9c1d8e96	Bacteria	Bacteroidetes	[Saprospirae]	[Saprospirales]
49363be39f4e73fc08154c4e95e73321	Bacteria	Actinobacteria	Actinobacteria	Actinomycetales	ACK-M1
0b60e65624fab50047f1eb1eb04002d1	Bacteria	Bacteroidetes	Flavobacteriia	Flavobacteriales	Cryomorphaceae
8735f92a7f18db944bc862777fbd3222	Bacteria	Proteobacteria	Betaproteobacteria	Burkholderiales	Comamonadaceae
3bb0bf5132b0f988573de9bd6059b22c	Bacteria	Proteobacteria	Betaproteobacteria	Burkholderiales	Comamonadaceae
e1664fbc297a312ba966923bfe185845	Bacteria	Bacteroidetes	Cytophagia	Cytophagales	Cytophagaceae
efe4682d2b4dabc0aee6bf43744f54c4	Bacteria	Actinobacteria	Acidimicrobiia	Acidimicrobiales	C111
c2e86c06a23f4cdd47e03f9ce22fe0f9	Bacteria	Actinobacteria	Acidimicrobiia	Acidimicrobiales	C111
62a845538d745dad19f77539227b3d83	Bacteria	Bacteroidetes	Flavobacteriia	Flavobacteriales	Cryomorphaceae
2dedf60782b3991cc0db7a015431a814	Bacteria	Actinobacteria	Acidimicrobiia	Acidimicrobiales	EB1017
837dffe8e58c86fd74dbee41cfc3991c	Bacteria	Proteobacteria
d6c6048d165a11a47c4c89fef20660a0	Bacteria	Proteobacteria	Betaproteobacteria	Methylophilales	Methylophilaceae
5ca616cdf71cd33902079e3cfcfbf60e	Bacteria	Proteobacteria	Betaproteobacteria	Burkholderiales	Alcaligenaceae
67ef9811465d4828d3b291ca4a5ca547	Bacteria	Cyanobacteria	Chloroplast	Cryptophyta
235a89f255d93a7570269a56c53dba64	Bacteria	Proteobacteria	Betaproteobacteria	Burkholderiales	Oxalobacteraceae	Polynucleobacter
61cb5f960b0ec2c7ab4d041f7c3f6cd8	Bacteria	Verrucomicrobia	Opitutae	[Cerasicoccales]	[Cerasicoccaceae]
fbcf8acf6ce9cf047ffdc988e35d13b3	Bacteria	Bacteroidetes	Sphingobacteriia	Sphingobacteriales
592f70fe9f5b7b42dd5d0eb961faa1f0	Bacteria	Cyanobacteria	Chloroplast	Chlorophyta	Chlamydomonadaceae
7c338eeece15edbfcf8ed52c568f6fc2	Bacteria	Proteobacteria	Gammaproteobacteria	Oceanospirillales	Halomonadaceae	CandidatusPortiera
df5a202cb8b5dd965d25b663c02af8d0	Bacteria	Cyanobacteria	Chloroplast	Haptophyceae
22d0bcd522f4d062db4886edef1ee30d	Bacteria	Proteobacteria	Gammaproteobacteria	Alteromonadales	HTCC2188	HTCC
b744eae1244325f606575483df0de67e	Bacteria	Proteobacteria	Alphaproteobacteria	Rickettsiales	Pelagibacteraceae
d483745fc51127093fcf524e1f1e3a34	Bacteria	Proteobacteria	Alphaproteobacteria	Rickettsiales
f7d481c6e4ae9e0ac296fe40603965f7	Bacteria	Bacteroidetes	Flavobacteriia	Flavobacteriales	Cryomorphaceae	Fluviicola
59da0ed6c4b6626c26b73745b1a3ef93	Bacteria	Armatimonadetes	Armatimonadia	Armatimonadales	Armatimonadaceae	CL0-1
690c48464d506b0e07bf7bdf6ccc0758	Bacteria	Bacteroidetes	Sphingobacteriia	Sphingobacteriales
91c17131cd04751c175243c37e94f7eb	Bacteria	Cyanobacteria	Chloroplast	Chlorophyta	Trebouxiophyceae
7b5ed1a5dbfdd60ca5370a26acabe326	Bacteria	Bacteroidetes	Flavobacteriia	Flavobacteriales	Flavobacteriaceae	Polaribacter
a03e297d34ac672d673b3253093914e4	Bacteria	Bacteroidetes	Sphingobacteriia	Sphingobacteriales
3592eff80384863b43da83f854567aeb	Bacteria	Bacteroidetes	Flavobacteriia	Flavobacteriales	Flavobacteriaceae	Polaribacter
241e8502021e383416a9408a45e63307	Bacteria	Bacteroidetes	Flavobacteriia	Flavobacteriales	Flavobacteriaceae	Flavobacterium
b1692e6de05b138f31d05ac33d4291f0	Bacteria	Cyanobacteria	Chloroplast
347716bb5136891ef74d6eb5d119e41a	Bacteria	Planctomycetes	Phycisphaerae	Phycisphaerales
a381f0333e4b087bbf5bf606bcb0a631	Bacteria	Actinobacteria	Actinobacteria	Actinomycetales	ACK-M1
4bd1bf5ab58039b778e18136f3ed1296	Bacteria	Cyanobacteria	Chloroplast	Chlorophyta	Trebouxiophyceae
b9ec925948ce85275d7f971e588f0b39	Bacteria	Proteobacteria	Alphaproteobacteria	Rhodobacterales	Rhodobacteraceae	Octadecabacter
ab976ca8b7323b4369470c5f3fd9a1fd	Bacteria	Proteobacteria	Alphaproteobacteria	Rhizobiales
4c3d8f073704bb3fa8bd79097324ee60	Bacteria	Bacteroidetes	Cytophagia	Cytophagales	Flammeovirgaceae
2b72428ebbcbfc529a8aecf2ea37157c	Bacteria	Actinobacteria	Actinobacteria	Actinomycetales
37762c5e9b1d5a5233d6caeef3660d6a	Bacteria	Actinobacteria	Acidimicrobiia	Acidimicrobiales
372df4811c66c481c68b34dd7d0ada33	Archaea	Crenarchaeota	Thaumarchaeota	Cenarchaeales	Cenarchaeaceae	Nitrosopumilus
02302e176d74b8b7d3342ea21dda7e5c	Bacteria	Proteobacteria	Gammaproteobacteria	Pseudomonadales	Moraxellaceae	Perlucidibaca
c39ea129388a077989abed2081b5fe88	Bacteria	Bacteroidetes	Cytophagia	Cytophagales	Cytophagaceae
22c618253124240b804cbc9c8371ea99	Bacteria	Actinobacteria	Thermoleophilia	Gaiellales
9adf9d24e5509b5ddba1d46d1e3952e4	Bacteria	Cyanobacteria	Synechococcophycideae	Synechococcales	Synechococcaceae	Synechococcus
94dcde6fbc8f38682f5f79321b020d22	Bacteria	Cyanobacteria	Synechococcophycideae	Synechococcales	Synechococcaceae	Synechococcus
89c76625e45ab0499f29cc2dc2beb69c	Bacteria	Chloroflexi	SL56
69456b706bb8d9b1987c13d809e8293e	Bacteria	Planctomycetes	Planctomycetia	Pirellulales	Pirellulaceae
53b227995a6a99a320f4efd39444e8ff	Bacteria	Bacteroidetes	Flavobacteriia	Flavobacteriales
4b9a9d8c4e661b02fad5ef87318e4020	Bacteria	Proteobacteria	Gammaproteobacteria	Oceanospirillales	Halomonadaceae	CandidatusPortiera
4bb8585142837115b245fbb620caaade	Bacteria	Proteobacteria	Alphaproteobacteria	Rickettsiales	mitochondria
2950abe3815428547c4eb7d9002a4c91	Bacteria	Actinobacteria	Actinobacteria	Actinomycetales	ACK-M1
07cddda789bdbbb862ad9c5e73d5824a	Bacteria	Proteobacteria	Betaproteobacteria	Methylophilales	Methylophilaceae
fe8c8a9a5a0157c514051708618ce535	Bacteria	Actinobacteria	Thermoleophilia	Solirubrobacterales
7857d3187944415a804e443783213d31	Bacteria	Proteobacteria	Gammaproteobacteria	Alteromonadales	HTCC2188	HTCC
7e8a6238d2b8e06fe07982db5f2dc2db	Bacteria	Proteobacteria	Alphaproteobacteria	Rickettsiales	Rickettsiaceae
dcda68119d2e24090194c9af5a818225	Bacteria	Proteobacteria	Alphaproteobacteria	Rhodobacterales	Rhodobacteraceae	Loktanella	vestfoldensis
476222b970d79ce648d99e7bb76b179d	Bacteria	Proteobacteria	Betaproteobacteria
720b43663d61f720cbda595a52767410	Bacteria	Cyanobacteria	Chloroplast	Stramenopiles
e2640b890e73b29c5474b346e4969b40	Bacteria	Bacteroidetes	Flavobacteriia	Flavobacteriales	NS9
be88e4d3065c7635dda8d854e93850ed	Bacteria	Actinobacteria	Acidimicrobiia	Acidimicrobiales	C111
9c886d46813a724862c055b0ed46e86d	Bacteria	Bacteroidetes	Flavobacteriia	Flavobacteriales	Flavobacteriaceae
54d9aba369f5b002ebed85fb76fcaf37	Bacteria	Proteobacteria	Betaproteobacteria	Methylophilales	Methylophilaceae
3627e37d11dd40b3e371fd11005fdad5	Bacteria	Cyanobacteria	Chloroplast	Haptophyceae
9bcce5172733b3fabf82e21069348ead	Bacteria	Proteobacteria	Alphaproteobacteria	Rickettsiales	mitochondria
1f93c77d645099d4e473c8ae649b23bf	Bacteria	Actinobacteria	Actinobacteria	Actinomycetales	Microbacteriaceae	CandidatusAquiluna	rubra
53b0bf16a3ebf64cb2ca3854a7853e91	Bacteria	Cyanobacteria	Chloroplast	Stramenopiles
754165389d1d58c2eec530e907fc5d65	Bacteria	Proteobacteria	Alphaproteobacteria	Rhizobiales
64edc344889f4279a1292afbe81dc043	Bacteria	Proteobacteria	Alphaproteobacteria	Rickettsiales	Pelagibacteraceae
ed039cbff88ddc9dbed020e880caaea0	Bacteria	Proteobacteria	Alphaproteobacteria	Rhizobiales
d1f2256dc0ed8d7d9458ed3b48f3cd2b	Bacteria	Proteobacteria	Gammaproteobacteria	Alteromonadales	211ds20
2ffc5bba8b56d331697fbd2db663fa69	Bacteria	Bacteroidetes	Sphingobacteriia	Sphingobacteriales
6f2244e5f9b507cb5df5a817ae1a8302	Bacteria	Verrucomicrobia	[Pedosphaerae]	[Pedosphaerales]	R4-41B
4776b32231aaee630aea9908de58a4d9	Bacteria	Actinobacteria	Actinobacteria	Actinomycetales
f02a8fc112896c014ac061ca2f27d6df	Bacteria	Actinobacteria	Acidimicrobiia	Acidimicrobiales	C111
2a720f2bb26470ac9599bebf608757ac	Bacteria	Bacteroidetes	Sphingobacteriia	Sphingobacteriales
2e0d5aa5dfe9a5326f50bb114d95978e	Bacteria	Cyanobacteria	Chloroplast	Stramenopiles
a85dac4b1f219056bae0918512ed5d8c	Bacteria	Proteobacteria	Gammaproteobacteria
c71fe9fd229a8546223bb74bbc54d0e8	Bacteria	Cyanobacteria	Chloroplast	Stramenopiles
a71c2b364419addf3c4a76844f1355fc	Bacteria	Proteobacteria	Betaproteobacteria	Burkholderiales	Comamonadaceae
bc9a99e95c42d814dbaeab935b2ba74c	Bacteria	Proteobacteria	Alphaproteobacteria	Rhodobacterales	Rhodobacteraceae	Rhodobacter
6b235822a9e52c63e60c1bd0601cb114	Bacteria	Bacteroidetes	Flavobacteriia	Flavobacteriales	Flavobacteriaceae	Flavobacterium
398b27b58cd45cd00d44f536a9411b08	Bacteria	Cyanobacteria	Chloroplast	Stramenopiles
14c7203af15e1859f6bcec4b477bcf42	Bacteria
56bc9f369fcdaac3138a359ab8bc49fe	Bacteria	Verrucomicrobia	Opitutae	[Cerasicoccales]	[Cerasicoccaceae]
70c039d8c51974900eb441e93620c97e	Bacteria	Cyanobacteria	Chloroplast	Stramenopiles
a09f9686e65622421296cf7ea7e92ae8	Bacteria	Gemmatimonadetes	Gemmatimonadetes	Gemmatimonadales	Gemmatimonadaceae	Gemmatimonas
f472eb6b56eccc5ffe281514e21802cd	Bacteria	Actinobacteria	Thermoleophilia	Gaiellales
9fe7a391fdc7d72d95b66fd3a1a5374c	Bacteria	Proteobacteria	Gammaproteobacteria	Alteromonadales	HTCC2188	HTCC
dd8229814f2d127e61ac92c5d275db8b	Bacteria	Proteobacteria	Betaproteobacteria	Burkholderiales	Comamonadaceae
5a2850d155835c025a77f54a5af01085	Bacteria	Bacteroidetes	Sphingobacteriia	Sphingobacteriales
f68c45909b99408dc34d145a2e374c45	Bacteria	Proteobacteria	Alphaproteobacteria	Rhizobiales
b9a72d442d7089ce53a873348fbe5071	Bacteria	Proteobacteria	Alphaproteobacteria	Sphingomonadales
2b171e4c26f481ddc20506b79877b519	Bacteria	Bacteroidetes	Flavobacteriia	Flavobacteriales	Cryomorphaceae	Fluviicola
4cfe5b5468150f8a54cf003ea4c15603	Bacteria	Proteobacteria	Gammaproteobacteria	Pseudomonadales	Moraxellaceae	Perlucidibaca
1311edfd06cb369478fd4ac2410a3bfd	Bacteria	Verrucomicrobia	[Spartobacteria]	[Chthoniobacterales]	[Chthoniobacteraceae]	CandidatusXiphinematobacter
3667bdb79bae37e87cc801ab34639b3e	Bacteria	Actinobacteria	Actinobacteria	Actinomycetales	ACK-M1
64d5abc702e5bcac2f33490e754bc457	Bacteria	Proteobacteria	Alphaproteobacteria	Rhodospirillales	Rhodospirillaceae	Reyranella	massiliensis
dd8d49ec775b64c5c0eaf87db986b38f	Bacteria	Bacteroidetes	Flavobacteriia	Flavobacteriales	Flavobacteriaceae	Flavobacterium
c53c03c968989613d1d10495e9b56d34	Bacteria	Bacteroidetes	Flavobacteriia	Flavobacteriales	Cryomorphaceae	Fluviicola
e750785f4ec0290b5b57ccbb9f86296c	Bacteria	Bacteroidetes	Flavobacteriia	Flavobacteriales	Cryomorphaceae	Fluviicola
ab227be65b5b39e154a826b5bb43d3c9	Bacteria	Bacteroidetes	[Saprospirae]	[Saprospirales]	Chitinophagaceae
4f6f8827a79e2de7326ca13eff5bdee8	Bacteria	Cyanobacteria	Chloroplast	Chlorophyta
466c2c4cb06ba39543c40a74c027008a	Bacteria	Actinobacteria	Actinobacteria	Actinomycetales	ACK-M1
a8128bcc0a94531fd5366f0c2fa30a96	Bacteria	Actinobacteria	Acidimicrobiia	Acidimicrobiales	C111
79ee2fe49b49eb577ecba4f586c0f124	Bacteria	Proteobacteria	Gammaproteobacteria	Oceanospirillales	Halomonadaceae	CandidatusPortiera
2bbe9ffa11b7f8f8f39949efd572622e	Bacteria	Actinobacteria	Acidimicrobiia	Acidimicrobiales	C111
e90365ed36204bee79d12dd8e193b677	Bacteria	Bacteroidetes	Flavobacteriia	Flavobacteriales	Flavobacteriaceae	Sediminicola
0f46c35d6629feaffa5e8f4b256e255b	Bacteria	Bacteroidetes	Flavobacteriia	Flavobacteriales	Flavobacteriaceae	Sediminicola
699b9ea66bef1f4ca49569657137341e	Bacteria	Bacteroidetes	Flavobacteriia	Flavobacteriales	Cryomorphaceae	Fluviicola
f2d693689c88ce5d49a45b49e0dccff1	Bacteria	Bacteroidetes	Flavobacteriia	Flavobacteriales	Flavobacteriaceae	Flavobacterium
1278e1fcb113cc302b185f3d4c4d94fe	Bacteria	Proteobacteria	Betaproteobacteria	Burkholderiales	Oxalobacteraceae
e8973ae029146677bed22be938cfec90	Bacteria	Bacteroidetes	[Rhodothermi]	[Rhodothermales]	Rhodothermaceae
90bf8c4ae78fcbc99cc9fc3be8d5ec87	Bacteria	Proteobacteria	Alphaproteobacteria	Rickettsiales	mitochondria	Thalassiosira	pseudonana
219a620aa72de55cbcdf5d38d6b93f86	Bacteria	Proteobacteria	Betaproteobacteria	Burkholderiales	Oxalobacteraceae	Polynucleobacter
a317a16b6d8047221b2fd8083bdfc0d8	Bacteria	Cyanobacteria	Chloroplast	Stramenopiles
2190dbbf36ecbe4bc58d62a9799c4c80	Bacteria	Bacteroidetes	Flavobacteriia	Flavobacteriales	Flavobacteriaceae	Ulvibacter
854cc9b373a82386b5aacf9af821798f	Bacteria	Cyanobacteria	Synechococcophycideae	Synechococcales	Synechococcaceae	Synechococcus
32f5ea2fe62977464afbb999b65e93d5	Bacteria	Actinobacteria	Actinobacteria	Actinomycetales	ACK-M1
badeae06f9f02ed7567ab02f37fc1612	Bacteria	Proteobacteria	Gammaproteobacteria	Alteromonadales	HTCC2188	HTCC
af80fb33e72fbb41c8e546e18ecc5acc	Bacteria	Cyanobacteria	Chloroplast	Chlorophyta	Trebouxiophyceae
93ffe58972bc33cd2395402c7cbfa380	Bacteria	Planctomycetes	Planctomycetia	Planctomycetales	Planctomycetaceae	Planctomyces
a46aeb4fd6ec88c28aa09dca8394b9be	Bacteria	Proteobacteria	TA18	PHOS-HD29
fb2dab56bf8047ade734c2fceccb49e4	Bacteria	Proteobacteria	Alphaproteobacteria	Rickettsiales	Pelagibacteraceae
2c674dd5dcc493fc0bad82c12f46397e	Bacteria	Proteobacteria	Alphaproteobacteria	Rickettsiales	Pelagibacteraceae
f9efe2e7cd51a9bce0239e5b139cb8fd	Bacteria	Cyanobacteria	Synechococcophycideae	Synechococcales	Synechococcaceae	Synechococcus
b7a2bc450146ff938fb3354ecc36444a	Bacteria	Proteobacteria	Betaproteobacteria	Methylophilales	Methylophilaceae
c4855f5652577f7141c9facef8b3e81f	Bacteria	Actinobacteria	Acidimicrobiia	Acidimicrobiales	Microthrixaceae
f5241871c9883eefa0989204886bf44e	Bacteria	Cyanobacteria	Chloroplast	Chlorophyta
55d3702709ba500b340b50ed178d15c8	Bacteria	Bacteroidetes	Flavobacteriia	Flavobacteriales	Cryomorphaceae	Fluviicola
2c079e24dc2f522c954ee445ac382624	Bacteria	Proteobacteria	Alphaproteobacteria	Rhodobacterales	Rhodobacteraceae	Rhodobacter
2822e32ad2c4d2fc9fb2d048c3d5a69b	Bacteria	Proteobacteria	Gammaproteobacteria	Oceanospirillales
3f04bd2a359b976892faa13fcb4de619	Bacteria	Actinobacteria	Actinobacteria	Actinomycetales	Microbacteriaceae	CandidatusRhodoluna
daffef7d90ce96421af461c0b75a97e9	Bacteria	Cyanobacteria	Chloroplast	Stramenopiles
aed191bac0b1c3264208a084af848bed	Bacteria	Proteobacteria	Betaproteobacteria	Burkholderiales	Comamonadaceae	Rhodoferax
cc60bdef4ebf7d009dec4be91269d442	Bacteria	Acidobacteria	Acidobacteria-6	iii1-15	RB40
63f71034e0a3b1e9b5f3fe25d094318d	Bacteria	Proteobacteria	Betaproteobacteria	Burkholderiales	Comamonadaceae
7628495872b6e72d1ab2310ace27b205	Bacteria	Cyanobacteria	Chloroplast	Stramenopiles
c58b8d27af57c37c4de34c3251b33601	Bacteria	Actinobacteria	Actinobacteria	Actinomycetales
5fbb8d16aa790e4cda6e53d9870c4656	Bacteria	Proteobacteria	Deltaproteobacteria	Myxococcales	OM27
56710e7205e713d843b6a64b63b4803d	Bacteria	Actinobacteria	Actinobacteria	Actinomycetales	ACK-M1
b899be5a0112fa5d46fea0ba45e66145	Bacteria	Bacteroidetes	Sphingobacteriia	Sphingobacteriales
0b14bc545295abb80247367673eb0d6f	Bacteria	Proteobacteria	Betaproteobacteria	Burkholderiales	Alcaligenaceae
fef3018fe3a9e60d9c24d53e887095a4	Bacteria	Proteobacteria	Betaproteobacteria	Burkholderiales	Comamonadaceae
fe4fa25ebd9180ab8ae225854891a5da	Bacteria	Bacteroidetes	Flavobacteriia	Flavobacteriales	Cryomorphaceae
6a55f886612aa1730cc76226061b6115	Bacteria	Planctomycetes	Phycisphaerae	Phycisphaerales
a431a69105441cdff4d23466d64ce786	Bacteria	Bacteroidetes	Flavobacteriia	Flavobacteriales	Cryomorphaceae	Fluviicola
6254d2326e6493ce4a0f590d5d325432	Bacteria	Bacteroidetes	Flavobacteriia	Flavobacteriales	Cryomorphaceae	Fluviicola
b4918ca05ca56eb640aa8aabf485ef04	Bacteria	Bacteroidetes	[Saprospirae]	[Saprospirales]	Chitinophagaceae
b93f2eb95b3fe4d5223c577dbc47756a	Bacteria	Proteobacteria	Betaproteobacteria
4ae83d74ad719968841b2be6d950de3f	Bacteria	Bacteroidetes	Flavobacteriia	Flavobacteriales	NS9
6533bf8927fde081ee036603a98b8fa4	Bacteria	Proteobacteria	Gammaproteobacteria
efe87d5e34411be2f29ab51fb34989c7	Bacteria	Bacteroidetes	Sphingobacteriia	Sphingobacteriales
91fd8961af37b5fd26c713305041544e	Bacteria	Bacteroidetes	Flavobacteriia	Flavobacteriales	Cryomorphaceae	Fluviicola
c1b4d4f034152d964a49c3f6559274ac	Bacteria	Cyanobacteria	Nostocophycideae	Nostocales	Nostocaceae	Dolichospermum
d41f6177db9a23f2c043d85c86823523	Bacteria	Bacteroidetes	Flavobacteriia	Flavobacteriales	Flavobacteriaceae	Flavobacterium
659da96ce96645ffaa90c3a772b4c97a	Bacteria	Proteobacteria	Betaproteobacteria	Burkholderiales	Oxalobacteraceae	Herminiimonas
5bbe2d8886da4e2af831748a63755b68	Bacteria	Verrucomicrobia	Opitutae	[Cerasicoccales]	[Cerasicoccaceae]
3b945aa6a66a6c2fe1c2cd13c0c2bfcd	Bacteria	Bacteroidetes	Flavobacteriia	Flavobacteriales	Flavobacteriaceae	Flavobacterium
3679631e2f2a3285f3be035d8d7cfc9a	Bacteria	Proteobacteria	Gammaproteobacteria	Alteromonadales	OM60
0dcaa4f89596268dd359d8b6c0e4e8f2	Bacteria	Proteobacteria	Alphaproteobacteria	Rhizobiales	Hyphomicrobiaceae	Rhodoplanes
b9017d425673e37963cfad9092c5b03e	Bacteria	Proteobacteria	Alphaproteobacteria	Rhodospirillales	Rhodospirillaceae
e747694a818ae82e58f977992c196fd0	Bacteria	Proteobacteria	Alphaproteobacteria	Rhodospirillales	Rhodospirillaceae
936c86f9ef8bd8238d01bd10f4d9c104	Bacteria	Verrucomicrobia	[Pedosphaerae]	[Pedosphaerales]
94720ea07668026aeed059a444b7e90d	Bacteria	Proteobacteria	Gammaproteobacteria	Alteromonadales	211ds20
66aea48c437ecdb4264f889c5f3cb5c9	Bacteria	Proteobacteria	Deltaproteobacteria
508e4d4db7e2c0220a19fafa294e0670	Bacteria	Proteobacteria	Betaproteobacteria	Methylophilales	Methylophilaceae
90c7c8146d5214896d639ec0a8e367ef	Bacteria	Proteobacteria	Alphaproteobacteria	Rickettsiales	mitochondria	Thalassiosira	pseudonana
e411ec81a83e1d49a5107bae7397fc50	Bacteria	Bacteroidetes	Flavobacteriia	Flavobacteriales	Flavobacteriaceae	Flavobacterium	frigidarium
f36ea145be9e036f9307bc28da74da86	Bacteria	Proteobacteria	Deltaproteobacteria	Myxococcales	OM27
e6e89dda427b5c446437d2403ad335e5	Bacteria	Cyanobacteria	Chloroplast	Stramenopiles
05e6f0c7be392dabdf7361d575a66819	Bacteria	Bacteroidetes	[Saprospirae]	[Saprospirales]	Chitinophagaceae	Sediminibacterium
4f9298e2f05a5248fcaca0636d0b0aeb	Bacteria	Cyanobacteria	Chloroplast	Haptophyceae
584dbd9cf4b609aecf37caf15ee9ebab	Bacteria	Proteobacteria	Betaproteobacteria	Burkholderiales	Comamonadaceae
fbd9b6f2c3b29c16b2445d716b7919ae	Bacteria	Proteobacteria	Gammaproteobacteria	Alteromonadales	Shewanellaceae	Shewanella
eb46c2125c13f968c394a6327e7d72cf	Bacteria	Bacteroidetes	Flavobacteriia	Flavobacteriales	Flavobacteriaceae	Lutibacter	litoralis
afc0eeec83a181be740331928d883362	Bacteria	Actinobacteria	Acidimicrobiia	Acidimicrobiales	C111
1ba1c6fba5cf7d1a4c6e3caef9e4c813	Bacteria	Proteobacteria	Betaproteobacteria
9910b78ecfcab8367a1b3ae162fb4cee	Bacteria	Planctomycetes	Planctomycetia	Gemmatales	Isosphaeraceae
4c4d23dffc21585b37b8b3084ff91b4c	Bacteria	Proteobacteria	Betaproteobacteria	Methylophilales	Methylophilaceae
9af3467db68cf6063627304cecd46a65	Bacteria	Proteobacteria	Gammaproteobacteria	Pseudomonadales	Pseudomonadaceae	Pseudomonas
22500a4c3a9efe21bfa984a2b95b24e1	Bacteria	Proteobacteria	Alphaproteobacteria	Rickettsiales	mitochondria
7ed766b10cea20bbbb4c1e8423d126f3	Bacteria	Proteobacteria	Gammaproteobacteria	Alteromonadales	HTCC2188	HTCC
b308a57733f11a4c2a93ab783cea4776	Bacteria	Proteobacteria	Gammaproteobacteria
8b08139d6eb5d7a849dff1bd579727d7	Bacteria	Proteobacteria	Betaproteobacteria	Burkholderiales	Comamonadaceae	RS62
ff5a61445b5934a14903e4c8e17edcca	Bacteria	Cyanobacteria	Chloroplast	Haptophyceae
901333b252d1a327085a7859cb820d8c	Bacteria	Proteobacteria	Gammaproteobacteria	Alteromonadales	211ds20
c197bfccc6da06a321f59bc2c96c7162	Bacteria	Proteobacteria	Alphaproteobacteria	Sphingomonadales
68b18e327874b4a4c1d6e69b2a00af10	Bacteria	Actinobacteria	Actinobacteria	Actinomycetales	ACK-M1
f4801b7a68515d9005fa572ee6afdf41	Bacteria	Proteobacteria	Betaproteobacteria	Burkholderiales	Oxalobacteraceae	Ralstonia
4f5d5c70f37db3c66d86b59a75e416ee	Bacteria	Proteobacteria	Alphaproteobacteria
a120ace2823a953a1a8cc10dd9d805e8	Bacteria	Proteobacteria	Gammaproteobacteria	Xanthomonadales	Xanthomonadaceae
2a4ba3d8829bb1be5f70251b3e387bb1	Bacteria	Chloroflexi	Chloroflexi	[Roseiflexales]
35bd358990986aceb5a8073f44b61e7f	Bacteria	Cyanobacteria	Chloroplast	Stramenopiles
595475f75ce3dacb86e7e42ecf971996	Bacteria	Planctomycetes	Phycisphaerae	Phycisphaerales
3fc227a79c6a108319409a05f87103f3	Bacteria	Bacteroidetes	[Rhodothermi]	[Rhodothermales]	Rhodothermaceae
9fc783bad0acc7e1cbbc51c0bbf9abd0	Bacteria	Bacteroidetes	Flavobacteriia	Flavobacteriales	Flavobacteriaceae	Flavobacterium
9bff57fd6b18040dfd67407bba81b94f	Bacteria	Proteobacteria	Gammaproteobacteria	Legionellales	Legionellaceae
22938df8e232d3f31729d9558a99c5cc	Bacteria	Actinobacteria	Actinobacteria	Actinomycetales	ACK-M1
9d0016d8de4b10b574d714d45aae6143	Archaea	Crenarchaeota	Thaumarchaeota	Cenarchaeales	Cenarchaeaceae	Nitrosopumilus
891c0f70ac9a35521db778bce7b12098	Bacteria	Cyanobacteria	Chloroplast	Stramenopiles
d9a05f2abab9fa1b399975cc3af9531a	Bacteria	Proteobacteria	Gammaproteobacteria	Alteromonadales	211ds20
9ead5ebb35a7c48356c2045918e3c953	Bacteria	Bacteroidetes	Flavobacteriia	Flavobacteriales	Flavobacteriaceae	Polaribacter
57e601205e8eb547bbbc0811bcf4afbd	Bacteria	Proteobacteria	Betaproteobacteria	Methylophilales	Methylophilaceae
aefa91f56a06801ca0624bd8a87d7ea9	Bacteria	Actinobacteria	Acidimicrobiia	Acidimicrobiales	EB1017
6158b1c3d46520276957e059c88a7a8f	Bacteria	Cyanobacteria	Chloroplast	Stramenopiles
361415f522e4c1e777562df222d2309b	Bacteria	Proteobacteria	Betaproteobacteria	MWH-UniP1
c3c77a60bf78b5495110b7be950f306c	Bacteria	Bacteroidetes	Cytophagia	Cytophagales	Cytophagaceae	Leadbetterella
4aa00c458d1dcf7c916ebbe17e00b3e7	Bacteria	Bacteroidetes	Sphingobacteriia	Sphingobacteriales	Sphingobacteriaceae
a75e45f67efe8186c0b9e9344b8d4d01	Bacteria	Proteobacteria	Alphaproteobacteria	Rickettsiales	mitochondria
ea377d5e27377eae2eb3de55f61ee3df	Bacteria	Bacteroidetes	[Saprospirae]	[Saprospirales]	Chitinophagaceae
ebfaffa75248ba00c7147d3c29829949	Bacteria	Verrucomicrobia	[Spartobacteria]	[Chthoniobacterales]	[Chthoniobacteraceae]	CandidatusXiphinematobacter
9a66017e03fdedda6651d86eb37a299f	Bacteria	Actinobacteria	Actinobacteria	Actinomycetales	Mycobacteriaceae	Mycobacterium
df641954cccdb1e6313ef6d80c4e99ed	Bacteria	Proteobacteria	Alphaproteobacteria	Rhodospirillales	Acetobacteraceae
c4dcef41373aba45b59042b08a812760	Bacteria	Proteobacteria	Betaproteobacteria	Burkholderiales	Oxalobacteraceae	Polynucleobacter
6c04fda77ffab719b8fc0280eee58e6b	Bacteria	Planctomycetes	Planctomycetia	Pirellulales	Pirellulaceae
ec0f8ae90d57024be7786b39bfa4fd35	Bacteria	Bacteroidetes	Flavobacteriia	Flavobacteriales	Cryomorphaceae	Fluviicola
2872e7cab81214aa8d18054fa4e095a1	Bacteria	Proteobacteria	Gammaproteobacteria	Alteromonadales	125ds10
2b4e6ccd11a78681bceaffed2053907f	Bacteria	Bacteroidetes	Flavobacteriia	Flavobacteriales
74c52060c151dc32f291fb0919bafc61	Bacteria	Chlorobi	OPB56
0fa1fef562d807dbf53ae07898c47396	Bacteria	Bacteroidetes	Flavobacteriia	Flavobacteriales
a080a409c3444a2a2ebd1d7716b1b32f	Bacteria	Proteobacteria	Alphaproteobacteria	Sphingomonadales
3ab7c0cfe8b6d8894bd243b70ab4a8e7	Bacteria	Cyanobacteria	Chloroplast	Cryptophyta
2c070f4880cc78c48ec292dd9c89b597	Bacteria	Proteobacteria	Alphaproteobacteria	Caulobacterales	Caulobacteraceae
b28d50f8401c6660191fcf0576c96b5a	Bacteria	Bacteroidetes	Flavobacteriia	Flavobacteriales	Flavobacteriaceae
71be5754288b27bba2fba6be9dbde596	Bacteria	Bacteroidetes	Flavobacteriia	Flavobacteriales	Flavobacteriaceae	Sediminicola
ce6e58a79ba6c93d36f15c8b437f7ce9	Bacteria	Bacteroidetes	Flavobacteriia	Flavobacteriales	Flavobacteriaceae	Flavobacterium
7dd273cfe05a5c5e224f299f760201cf	Bacteria	Proteobacteria	Gammaproteobacteria	Pseudomonadales	Pseudomonadaceae
81e4d0cfd0a3c3f0298bb897e22715d0	Bacteria	Bacteroidetes	Flavobacteriia	Flavobacteriales	Cryomorphaceae	Fluviicola
d8d24bfd1fe2616ed4d1100a7cb56940	Bacteria	Bacteroidetes	Flavobacteriia	Flavobacteriales	Flavobacteriaceae
a4e7c4029a5970db9ae5de9cb1b8ced9	Bacteria	Planctomycetes	Planctomycetia	Pirellulales	Pirellulaceae
755afc7ffddcfd5e093ea2222f4affd6	Bacteria	Verrucomicrobia	Opitutae	Opitutales	Opitutaceae	Opitutus
335fc1282f07d47856fa84e621f939db	Bacteria	Actinobacteria	Acidimicrobiia	Acidimicrobiales	C111
5f90e5e7aad12d9e54489149dae680a5	Bacteria	Bacteroidetes	[Saprospirae]	[Saprospirales]	Chitinophagaceae
99e433a3ce4d5290445f668df2c9147e	Bacteria	Proteobacteria	Gammaproteobacteria	Pseudomonadales	Pseudomonadaceae	Pseudomonas	fragi
42016433985454f3186dde297fc37eb6	Bacteria	Cyanobacteria	Chloroplast	Stramenopiles
8e1161b45335e125da5a572c1b2cea64	Bacteria	Proteobacteria	Deltaproteobacteria	Myxococcales
f3568df8761f514321bcc3925853154c	Bacteria	Actinobacteria	Actinobacteria	Actinomycetales
2b3e3f7cf214cb5c2056486c550b3cb5	Bacteria	Bacteroidetes	Sphingobacteriia	Sphingobacteriales
a07da86a91a8a246c06196fae2f4966d	Bacteria	Actinobacteria	Actinobacteria	Actinomycetales	ACK-M1
9486da0dfc61a6cc41f58f2c399de20d	Bacteria	Actinobacteria	Actinobacteria	Actinomycetales	Microbacteriaceae
3df65496fb0a02b5389f4df626a903b2	Bacteria	Verrucomicrobia	Opitutae	Opitutales	Opitutaceae	Opitutus
4c637ed47902beff54e1a95c7fc37515	Bacteria	Proteobacteria	Betaproteobacteria
a3ae3c687963932fa954dcfe04ea8f17	Bacteria	Bacteroidetes	Flavobacteriia	Flavobacteriales	Flavobacteriaceae	Flavobacterium	gelidilacus
70f086828189cd2b21299d41e077a74a	Bacteria	Proteobacteria	Alphaproteobacteria	Rhodospirillales	Rhodospirillaceae
ca0aa217c5865942af9060f5358eee66	Bacteria	Cyanobacteria	Chloroplast	Stramenopiles
aeb1918413f803c42baa9f398d9f83e8	Bacteria	Actinobacteria	Actinobacteria	Actinomycetales
e50a50d4bd03e9347d5caf3397469f60	Bacteria	Bacteroidetes	[Saprospirae]	[Saprospirales]
3b7613a1bb56a34bcfa73ebf8ece3711	Bacteria
6cbe27b7fc5eed8d6daed17ae455f1d6	Bacteria	Proteobacteria	Gammaproteobacteria	Alteromonadales	Alteromonadaceae	HTCC2207
86b999cc481d92c39c2d7e0643fb25ce	Bacteria	Bacteroidetes	Flavobacteriia	Flavobacteriales	Flavobacteriaceae	Flavobacterium
225881b1a09cd74a675e753c7d6482e1	Bacteria	Proteobacteria	Alphaproteobacteria	Kiloniellales	Kiloniellaceae
00d4306620fb956f4cb8ea6616da13a3	Bacteria	Proteobacteria	Alphaproteobacteria	Rhizobiales
089da56ed68b4e0f43fdabce794074f1	Bacteria	Proteobacteria	Gammaproteobacteria	Alteromonadales	Shewanellaceae	Shewanella
9f81b529f0ed2f9bfbccee49b97187d3	Bacteria	Actinobacteria	Acidimicrobiia	Acidimicrobiales
145c6114e80075523d389e650ee349e4	Bacteria	Bacteroidetes	Flavobacteriia	Flavobacteriales	Flavobacteriaceae	Flavobacterium
23fb1025702cf06ee85466ea509b3f50	Bacteria	Acidobacteria	Holophagae	Holophagales	Holophagaceae
874731b48143abc716350a66f6ceb7aa	Bacteria	Cyanobacteria	Chloroplast	Haptophyceae
705f5d0a989ba0710a478c1374551909	Bacteria	Bacteroidetes	Flavobacteriia	Flavobacteriales	Cryomorphaceae	Crocinitomix
6c420927d268a57526df90a00625bc32	Bacteria	Actinobacteria	Acidimicrobiia	Acidimicrobiales	C111
84776907a1d77f7ba9ef074fbb2eb86f	Bacteria	Proteobacteria	Alphaproteobacteria	Rhizobiales
a9d1fa63d4896a301891704f37fb9884	Bacteria	Actinobacteria	Actinobacteria	Actinomycetales
c18423578bc01b00706b60cd784c3425	Bacteria	Proteobacteria	Gammaproteobacteria	Xanthomonadales	Sinobacteraceae
1b41f15408c9065eddd877a379aedba6	Bacteria	Bacteroidetes	Sphingobacteriia	Sphingobacteriales
104b747159f842223580038683e5dba4	Bacteria	Verrucomicrobia	[Pedosphaerae]	[Pedosphaerales]
43ef5237004d4c4358fd7997fab872a5	Bacteria	Proteobacteria	Alphaproteobacteria	Ellin329
bb74771a0d5cfcba20b946048ec4b879	Bacteria	Proteobacteria	Gammaproteobacteria	Chromatiales	Ectothiorhodospiraceae
d09a5a2f3481593ed3f4ad877ed08536	Bacteria	Proteobacteria	Betaproteobacteria	Burkholderiales	Oxalobacteraceae	Herminiimonas
0268ddf17919bc857a54e4a1655a4e4b	Bacteria	Proteobacteria	Alphaproteobacteria	Rhodospirillales	Acetobacteraceae
f9491c3e6b9696bee439b98d32336180	Bacteria	Bacteroidetes	Flavobacteriia	Flavobacteriales	Flavobacteriaceae	Flavobacterium
281d156b28a525dea188a61aea8b1f2d	Bacteria
b9fd36e399248ace31c2d286d1a1fcd2	Bacteria	Proteobacteria	Betaproteobacteria	Nitrosomonadales	Nitrosomonadaceae
9ec4187530f3b9073db8875e9551e385	Bacteria	Cyanobacteria	Chloroplast	Chlorophyta
5fbdd4b82169ee0ae6c572e71a79049b	Bacteria	Proteobacteria	Gammaproteobacteria	Xanthomonadales	Sinobacteraceae
224f8177d924045c9b5cd04c250edd08	Bacteria	Proteobacteria	Gammaproteobacteria	Alteromonadales	OM60
1492f53f9e14475a2b6a7695baa93d06	Bacteria	Bacteroidetes	[Rhodothermi]	[Rhodothermales]	Rhodothermaceae
06f6280d6271d356d5e61d6bce8be759	Bacteria	Bacteroidetes	Flavobacteriia	Flavobacteriales	Cryomorphaceae	Fluviicola
ad0bf88826aba1a9b2612db50a8c91f0	Bacteria	Bacteroidetes	Cytophagia	Cytophagales	Flammeovirgaceae
93f8d28139be91da38fc73f86f32b5c2	Bacteria	Fibrobacteres	Fibrobacteria	258ds10
4e0639b49b93717ffde253f8bbab880f	Bacteria	Proteobacteria	Alphaproteobacteria	Rhodospirillales	Acetobacteraceae
6743d86267388e74225887defac3e471	Bacteria	Verrucomicrobia	[Pedosphaerae]	[Pedosphaerales]	R4-41B
fc7b257064027e1bc2b6fbfb4584677d	Bacteria	Proteobacteria	Betaproteobacteria	Burkholderiales	Comamonadaceae	Methylibium
596dfd6a0a6b17cc5d46a65ab07e5c33	Bacteria	Proteobacteria	Alphaproteobacteria	Rhodospirillales	Rhodospirillaceae
b4a21b48ca6397ec82217703c164adc9	Bacteria	Cyanobacteria	Chloroplast
d201cbacd1c567ff782a4fefb0caf09b	Bacteria	Planctomycetes	Planctomycetia	Pirellulales	Pirellulaceae
84563fa64fdf865a9854bd2fc11450b1	Bacteria	Proteobacteria	Betaproteobacteria	Burkholderiales	Oxalobacteraceae	Polynucleobacter
e76e73dc0167eaad9acd3336d3a6fe57	Bacteria	Bacteroidetes	Sphingobacteriia	Sphingobacteriales
f053778ac11218db2855b879731e41f6	Bacteria	Proteobacteria	Alphaproteobacteria	Rhodobacterales	Rhodobacteraceae	Loktanella	salsilacus
317999165c74566a95b22617a6932402	Bacteria	Cyanobacteria	Chloroplast	Stramenopiles
88524108706087f7c75e79d6c10c9c61	Bacteria	Bacteroidetes	Flavobacteriia	Flavobacteriales	Flavobacteriaceae	Flavobacterium	succinicans
7359790b9124fa0457b49a6c8d6cd57c	Bacteria	Proteobacteria	Alphaproteobacteria	Rhizobiales
074c72cc39b32c1386dfb891ef361509	Bacteria	Actinobacteria	Actinobacteria	Actinomycetales	ACK-M1
e22e50214b91228bf962da281ca23afb	Bacteria
d101599ee1ddf18f6cfde88752489fcd	Bacteria	Proteobacteria	Betaproteobacteria
2a7705179723c601c792f55602636bda	Bacteria
0263d79ba5568fc313b909925a8607ec	Bacteria	Proteobacteria	Betaproteobacteria	Burkholderiales	Comamonadaceae
8b2b5a2cfd551d398c5ae65f22271372	Bacteria	Proteobacteria	Alphaproteobacteria	Caulobacterales	Caulobacteraceae
81bcadac8d516ce6d9b9e274ebd9561f	Bacteria	Bacteroidetes	Flavobacteriia	Flavobacteriales	Cryomorphaceae	Fluviicola
e4278f7eb9e1d1595866d1c4440c78c9	Bacteria	Bacteroidetes	Flavobacteriia	Flavobacteriales	Flavobacteriaceae	Flavobacterium	frigidarium
8620388bca4ee0e81199264d30247d88	Bacteria	Proteobacteria	Gammaproteobacteria	Thiotrichales	Piscirickettsiaceae
25ec277575c4c38dc280e1a28c0fbc15	Bacteria	Bacteroidetes	Flavobacteriia	Flavobacteriales	Cryomorphaceae	Fluviicola
0e1a21f014887edc560531b0c9d0e691	Bacteria	Proteobacteria	Alphaproteobacteria	Rhizobiales
1fa4aecbb95f7fee5facfcbe397fb379	Bacteria	Actinobacteria	Thermoleophilia	Solirubrobacterales
9f0f4c5f556233fdb591ff98530d9506	Bacteria	Bacteroidetes	Sphingobacteriia	Sphingobacteriales	Sphingobacteriaceae	Pedobacter	daechungensis
ddc675e112b72bef9bd8bbdd384c64f6	Bacteria	Verrucomicrobia	[Methylacidiphilae]	Methylacidiphilales	LD19
d2d01dc861fd4b0a6572489b26e9eb1a	Bacteria	Proteobacteria	Epsilonproteobacteria	Campylobacterales	Campylobacteraceae	Arcobacter
b0ee5152837e6dd4bac2d3a08b1207f3	Bacteria	Bacteroidetes	Flavobacteriia	Flavobacteriales	Flavobacteriaceae	Flavobacterium	succinicans
4c461166a8c0f8ac6b2d1cf41ed478fd	Bacteria	Bacteroidetes	Flavobacteriia	Flavobacteriales	Cryomorphaceae	Fluviicola
9810504f08e9da99f8d56cab749e6b6c	Bacteria	Proteobacteria	Deltaproteobacteria	Bdellovibrionales	Bacteriovoracaceae	Peredibacter	starrii
883db5d084c1d946916056f5e3a64bd6	Bacteria	Actinobacteria	Actinobacteria	Actinomycetales	Mycobacteriaceae	Mycobacterium
7563eca03e9945c9920f665331059704	Bacteria	Proteobacteria	Alphaproteobacteria	Rhodospirillales	Rhodospirillaceae
c505f27afd1308b68eeaff609f036bf4	Bacteria	Cyanobacteria	Synechococcophycideae	Synechococcales	Synechococcaceae	Synechococcus
b968fc1f8ed4d7fbacac9d1f3a23ffc4	Bacteria	Acidobacteria	Solibacteres	Solibacterales	PAUC26f
1b3f00da8c05b987c2ade5f7ea1fbf6f	Bacteria	Bacteroidetes	Flavobacteriia	Flavobacteriales	Cryomorphaceae	Fluviicola
9593085a56448844ffca0c8957199b47	Bacteria	Proteobacteria	Gammaproteobacteria	Xanthomonadales	Xanthomonadaceae
53a7a37e2eaf51d5e4b53d03edeb116c	Bacteria	Proteobacteria	Alphaproteobacteria
d9b0f02cba77a6a94a04906170cc9563	Bacteria	Planctomycetes	Planctomycetia	Pirellulales	Pirellulaceae
fcacc1a798bb0322e8cd110c6d8d1011	Bacteria	Proteobacteria	Alphaproteobacteria	Ellin329
f22dbe466ab7a6820a3fa8f0c23529d6	Bacteria	Proteobacteria	Gammaproteobacteria	Pseudomonadales	Moraxellaceae	Alkanindiges
323e559473b0f1ae7b6c063c047e4e64	Bacteria	Proteobacteria	Deltaproteobacteria	Bdellovibrionales	Bacteriovoracaceae	Peredibacter	starrii
30ada6e0a5a8b8bd031ed8d03236519a	Bacteria	Actinobacteria	Acidimicrobiia	Acidimicrobiales	C111
50c1adc394d69456bab0180bd2d25d57	Bacteria	Bacteroidetes	[Saprospirae]	[Saprospirales]	Chitinophagaceae	Sediminibacterium
a9360c0a1300c954aefbdaeb9109d345	Bacteria	Cyanobacteria	Chloroplast	Stramenopiles
11b50e80047289f589868d85531954f4	Bacteria	Bacteroidetes	Flavobacteriia	Flavobacteriales	Cryomorphaceae	Fluviicola
8dcdccf3d92d187cae8c1655a78b8bd8	Bacteria	Cyanobacteria	Chloroplast	Stramenopiles
fecd0294f7ecdb7bc5c54d01e9f541f0	Bacteria	Actinobacteria	Thermoleophilia	Gaiellales
eff34b14b4ece9f2c89cdbb1e0bbcd81	Bacteria	Proteobacteria	Betaproteobacteria	Rhodocyclales	Rhodocyclaceae
e990c276fbc1c79a05390fbf6840daf2	Bacteria	Proteobacteria	Betaproteobacteria	Burkholderiales	Comamonadaceae
eac71bc503da96a4e254a9d4252e75f4	Bacteria	Actinobacteria	Actinobacteria	Actinomycetales	ACK-M1
53b547b6b5c21d5372846bb3cab09f72	Bacteria	Proteobacteria	Alphaproteobacteria	Rhizobiales
23d2311e0bad97ba4f0f594a781a47fa	Bacteria	Actinobacteria	Acidimicrobiia	Acidimicrobiales
efbe1f58b1e2984ddc53a64f047d94ff	Bacteria	Proteobacteria	Betaproteobacteria	Burkholderiales	Oxalobacteraceae	Janthinobacterium	lividum
96499df64e068853b5d8715148bb1476	Bacteria	Actinobacteria	Actinobacteria	Actinomycetales	ACK-M1
74a23a7905ecbc979af2c844d6586ae1	Bacteria	Bacteroidetes	Flavobacteriia	Flavobacteriales	Cryomorphaceae	Fluviicola
6021bddead0c1155ea2c3f71bbd21cb8	Bacteria	Firmicutes	Erysipelotrichi	Erysipelotrichales	Erysipelotrichaceae
b256952de889272b156f03a2be125fab	Bacteria	Proteobacteria	Gammaproteobacteria	Alteromonadales	211ds20
77bcde7c5c86bfffc9b75c9de5a560b8	Bacteria	Proteobacteria	Betaproteobacteria
1c0a41b245b48aa722208b4c004c6596	Bacteria	Actinobacteria	Actinobacteria	Actinomycetales	Mycobacteriaceae	Mycobacterium
715a2269cda2a7f6a00e92ab001c8fdb	Bacteria	Proteobacteria	Gammaproteobacteria	Alteromonadales	211ds20
f4373152f6615c1d09aadd2357be986a	Bacteria	Cyanobacteria	Chloroplast	Stramenopiles
1e1535265ac4e69a39e5e28aa8665a55	Bacteria	Bacteroidetes	Flavobacteriia	Flavobacteriales
1515800f8d179fd9c4c343fabe898d9a	Bacteria	Proteobacteria	Alphaproteobacteria	Rhodospirillales	Rhodospirillaceae
d8b62aa17ccf107f192abf242452db50	Bacteria	Actinobacteria	Actinobacteria	Actinomycetales
788e450d1af26126c6217582a3e194ed	Bacteria	Proteobacteria	Alphaproteobacteria	Rickettsiales	Pelagibacteraceae
61803a9c5c16718a20951547b2d2dc4f	Bacteria	Bacteroidetes	Cytophagia	Cytophagales	Cytophagaceae	Leadbetterella
177d2176a3368f43cc132f9e34a9405c	Bacteria	Planctomycetes	Planctomycetia	Pirellulales	Pirellulaceae
9176a4011d0b5a7a3fe654f25319091e	Bacteria	Proteobacteria	Alphaproteobacteria	Rickettsiales
86a602d45fae6ac205481af201a89281	Bacteria	Verrucomicrobia	Verrucomicrobiae	Verrucomicrobiales	Verrucomicrobiaceae	Luteolibacter
4d0a36c5a51e221dfa0b92956bc29a67	Bacteria	Bacteroidetes	[Saprospirae]	[Saprospirales]	Chitinophagaceae	Sediminibacterium
c67744b93c1aac731ad718596675f25e	Bacteria	Proteobacteria	Alphaproteobacteria	Rhodobacterales	Hyphomonadaceae	Hyphomonas
dc9e4749ecece058eaefcae0b5e4adf3	Bacteria	Proteobacteria	Gammaproteobacteria	Alteromonadales	Shewanellaceae	Shewanella
e8aeb250cad9a898bdd9d0e1184ea167	Bacteria	Bacteroidetes	Cytophagia	Cytophagales	Flammeovirgaceae	Reichenbachiella
83233b11607e6ceeca0bb04473bdb798	Bacteria	Proteobacteria	Deltaproteobacteria	Bdellovibrionales	Bacteriovoracaceae	Peredibacter	starrii
6228d4a227f9be888bdd0fb45c0a6130	Bacteria	Proteobacteria	Alphaproteobacteria
d36b3b611aa93a2b40910492cef121d2	Bacteria	Cyanobacteria	Chloroplast	Haptophyceae
030ea93a2442cc89dba2162bc1244368	Bacteria	Bacteroidetes	Flavobacteriia	Flavobacteriales	Cryomorphaceae
68b19236ddb8fc16d035a06ae6b296b8	Bacteria	Chlorobi	OPB56
8cff7bc3fb5f7586f26e4837583cb108	Bacteria	Proteobacteria	Gammaproteobacteria	Alteromonadales	OM60
8eca9f01875c37563054a2ce6358de53	Bacteria	Proteobacteria	Alphaproteobacteria	Rickettsiales	mitochondria
25113574da75009664fe57dcc858c184	Bacteria	Bacteroidetes	Flavobacteriia	Flavobacteriales	Flavobacteriaceae	Flavobacterium	frigidarium
f048e796110007f74363c16ae29f9eaf	Bacteria	Cyanobacteria	Chloroplast	Stramenopiles
299cd0a15535a512e163064720e52049	Bacteria	Bacteroidetes	Sphingobacteriia	Sphingobacteriales
9130ba5d659e6338e841ef4c65deba28	Bacteria	Actinobacteria	Actinobacteria	Actinomycetales	ACK-M1
eefff0223ce7d1107aac1de39297e175	Bacteria	Verrucomicrobia	Opitutae	Opitutales	Opitutaceae
90aa9af64338436aa5817c4861fdd4b0	Bacteria	Planctomycetes	Planctomycetia	Planctomycetales	Planctomycetaceae	Planctomyces
3e1a26e59596ea4b27910d21a7f2685f	Bacteria	Verrucomicrobia	Verrucomicrobiae	Verrucomicrobiales	Verrucomicrobiaceae	Luteolibacter
5a5620cf1d95d4626397b5fe71892e0a	Bacteria	Verrucomicrobia	Verrucomicrobiae	Verrucomicrobiales	Verrucomicrobiaceae	Verrucomicrobium
02a021a4a33ccd51f4b020422088397b	Bacteria	Bacteroidetes	Flavobacteriia	Flavobacteriales	Flavobacteriaceae	Flavobacterium
1e892adf45bea4cbc34c94b4df1a7f87	Bacteria	Bacteroidetes	Sphingobacteriia	Sphingobacteriales	NS11-12
15d33303de8a2df0d68b1f0c198e38e4	Bacteria	Bacteroidetes	Cytophagia	Cytophagales	Cytophagaceae	Leadbetterella
75ba6f1992139fb3fe848d91a1721d29	Bacteria	Proteobacteria	Alphaproteobacteria	Ellin329
d23f0c0c17f5cd175eb55b714d094393	Bacteria	Bacteroidetes	Sphingobacteriia	Sphingobacteriales	Sphingobacteriaceae	Pedobacter
811eb9d850c96de0234a2000f731c2e5	Bacteria	Proteobacteria	Gammaproteobacteria	Oceanospirillales	Halomonadaceae	CandidatusPortiera
3b29656fafebe2fbca061ed249f7fdf6	Bacteria	Proteobacteria	Gammaproteobacteria	Alteromonadales	OM60
5b328106196bf21a3329ee24296278b0	Bacteria	Bacteroidetes	Flavobacteriia	Flavobacteriales	Flavobacteriaceae	Flavobacterium
7987aaa1343fa88df0c87e81b3f26c41	Bacteria	Actinobacteria	Actinobacteria	Actinomycetales	Microbacteriaceae	CandidatusRhodoluna
6b08b339298c086bfac594e0044a1107	Bacteria	Proteobacteria	Gammaproteobacteria	Legionellales	Legionellaceae	Legionella
f2d4e9e8e9bc07e40b9d21ab8d86f4c9	Bacteria	Proteobacteria	Betaproteobacteria	Burkholderiales	Comamonadaceae
5183d97b2862d0ab4cacfd081ab5d0fe	Bacteria	Proteobacteria	Alphaproteobacteria	Rickettsiales	Rickettsiaceae
f246c43c55c157fc80e9fed0198044cb	Bacteria	Proteobacteria	Gammaproteobacteria	Alteromonadales	211ds20
d3a5ff055babaeeea425e69e726c5255	Bacteria	Bacteroidetes	Sphingobacteriia	Sphingobacteriales	Sphingobacteriaceae
ab6933b6130d806e6db6980c3b8ed0fa	Bacteria	Verrucomicrobia	[Pedosphaerae]	[Pedosphaerales]	R4-41B
02d22cf5cd8f11940eceb737041f682c	Bacteria	Bacteroidetes	Sphingobacteriia	Sphingobacteriales
19bf0c1b9f4d2805e5df22736695b103	Bacteria	Verrucomicrobia	Verrucomicrobiae	Verrucomicrobiales	Verrucomicrobiaceae	Prosthecobacter
307ddec3c7707da5e8a62de70cab1274	Bacteria	Proteobacteria	Gammaproteobacteria	Alteromonadales	OM60
ef26130c65d1473e1cb861510769ced0	Bacteria	Planctomycetes	Planctomycetia	Pirellulales	Pirellulaceae
7876a5906e5be58d068237cd0b6ebb3c	Bacteria	Proteobacteria	Gammaproteobacteria	Xanthomonadales	Sinobacteraceae
54f6e509d190e327d144a3ae92e1e73a	Bacteria	Proteobacteria	Alphaproteobacteria	Rickettsiales
7cdbc15174302c59a8ceeb73fbb34a93	Bacteria	Proteobacteria	Alphaproteobacteria	Rickettsiales	mitochondria
1f2be97caa9599dc6fd1521953734180	Bacteria	Actinobacteria	Acidimicrobiia	Acidimicrobiales	C111
289a6cadbce19316f21ed2f7133f940d	Bacteria	Bacteroidetes	Cytophagia	Cytophagales	Cyclobacteriaceae
769469d3afeada5190f45352f848faf0	Bacteria	Proteobacteria	Alphaproteobacteria	Sphingomonadales	Sphingomonadaceae	Novosphingobium
43e3f9686e7c3bfcc879e76488e5b8eb	Bacteria	Actinobacteria	Acidimicrobiia	Acidimicrobiales	C111
c191261eecdb2363498ade5aaa7c186a	Bacteria	Proteobacteria	Alphaproteobacteria
f7e80d8a8a88ee12a62cbb6b04b1bdac	Bacteria	Proteobacteria	Alphaproteobacteria	Rickettsiales	Pelagibacteraceae
c45486e332113011f595d0edd05e6fc1	Bacteria	Verrucomicrobia	[Methylacidiphilae]	Methylacidiphilales	LD19
711287bfc8816a864204f4cb9a694d81	Bacteria	Proteobacteria	Alphaproteobacteria
66e82bd4fc1592273c395aebba662763	Bacteria	Proteobacteria	Gammaproteobacteria	Thiotrichales	Piscirickettsiaceae
4e88579530afedc3ba64c33a96a9e9d6	Bacteria	Bacteroidetes	Sphingobacteriia	Sphingobacteriales
c9232b7bd92e5d869d1770f7f4050ca2	Bacteria	Cyanobacteria	Chloroplast	Chlorophyta	Mamiellaceae
4d5467aeaa75e026c74956f5af397574	Bacteria	Cyanobacteria	Chloroplast	Cryptophyta
dea20621e5551f748e3311e0e6d41f33	Bacteria	Proteobacteria	Alphaproteobacteria	Rickettsiales	mitochondria
049c81252a518dddbb32501bf03f514a	Bacteria	Bacteroidetes	Sphingobacteriia	Sphingobacteriales	Sphingobacteriaceae
107273e73071282e4d0f4a0b46548da5	Bacteria	Proteobacteria	Gammaproteobacteria	Aeromonadales	Aeromonadaceae
91df70c958165f68ade772bfabcb826a	Bacteria	Gemmatimonadetes	Gemmatimonadetes	KD8-87
6828d9045ff96d05afe4b80767b46542	Bacteria	Actinobacteria	Actinobacteria	Actinomycetales
9d99b12f8381b775f7edd3648e9eb685	Bacteria	Proteobacteria	Gammaproteobacteria	Alteromonadales	211ds20
ddd1e6d12c9918e209d5e13b78176d9f	Bacteria	Proteobacteria	Alphaproteobacteria	Rhodospirillales	Rhodospirillaceae
455daf5f34bb6ce383f8c63ed5e803cf	Bacteria	Proteobacteria	Alphaproteobacteria	Rhizobiales
f672aa3aea2d03f0b297739022e9b716	Bacteria	Proteobacteria	Betaproteobacteria	Burkholderiales	Comamonadaceae	Rubrivivax
1a4f7d19c258bccf264fb13efefe3786	Bacteria	Cyanobacteria	Chloroplast	Stramenopiles
6dbcac935416e6abf7de146d2c3480d8	Bacteria	Cyanobacteria	Chloroplast	Stramenopiles
9e560c6d4561a75e2ec7194da5e942eb	Bacteria	Bacteroidetes	Flavobacteriia	Flavobacteriales	Cryomorphaceae
2a19a73c06d11bf6d14d021db39165ea	Bacteria	Acidobacteria	Acidobacteria-6	iii1-15	RB40
8741b8bca3a0450b2d57b22df7472681	Bacteria	Proteobacteria	Alphaproteobacteria	Rhodospirillales	Rhodospirillaceae
9e6c74996690d3c5e03f3c1ab168a2b9	Bacteria	Proteobacteria	Alphaproteobacteria	Ellin329
f9e864a4b56320d9a9d165537511a13a	Bacteria	Proteobacteria	Gammaproteobacteria	Methylococcales	Crenotrichaceae	Crenothrix
700ffbf9345fbe312a574a0db27d6634	Bacteria	Actinobacteria	Actinobacteria	Actinomycetales	ACK-M1
de217d3df0f64871d6e5bb9d105aeee4	Bacteria	Verrucomicrobia	Opitutae	Opitutales	Opitutaceae	Opitutus
abd34643df4e48940286e05ff8518132	Bacteria	Proteobacteria	Betaproteobacteria	Burkholderiales	Oxalobacteraceae
a10603a4e83ecc0232d9def2a1ec368c	Bacteria	Cyanobacteria	Chloroplast	Stramenopiles
263b10740ac9469073d6c544f895b9d0	Bacteria	Chlamydiae	Chlamydiia	Chlamydiales	Parachlamydiaceae	CandidatusProtochlamydia
03509702bb8b191d22709cd052e4612a	Bacteria	Proteobacteria	Betaproteobacteria	Burkholderiales	Oxalobacteraceae	Polynucleobacter
77ba425e2961f299d8d7b83922702d85	Bacteria	Cyanobacteria	Chloroplast	Stramenopiles
b596f176ec080cf5ed86e74b889fc0cf	Bacteria	Proteobacteria	Alphaproteobacteria	Rickettsiales	Pelagibacteraceae
db4abe68382f1a544c6d2c2645a33bda	Bacteria	Gemmatimonadetes	Gemmatimonadetes	KD8-87
61130f51b6bcbf8a0951ab51792f7f5b	Bacteria	Proteobacteria	Gammaproteobacteria	Alteromonadales	Colwelliaceae
f0b0b948f6334a8c1fe7355e7412efbd	Bacteria
489b6644c4208ce92217ef4ad8f646e7	Bacteria	Cyanobacteria	Chloroplast	Haptophyceae
3122109a0af5929c4284ed3b1c81d754	Bacteria	Bacteroidetes	Flavobacteriia	Flavobacteriales	Cryomorphaceae
026b68ad384fbb3f5bb0f6769b1b4fce	Bacteria	Proteobacteria	Betaproteobacteria	Burkholderiales	Oxalobacteraceae
7f862d47af52669cc0105ef893caaf4e	Bacteria	Proteobacteria	Alphaproteobacteria	Rickettsiales	mitochondria	Thalassiosira	pseudonana
642d71d15ee5a8398071748ae5081d4d	Bacteria	Verrucomicrobia	Verrucomicrobiae	Verrucomicrobiales	Verrucomicrobiaceae	Luteolibacter
a630681ba72a80c92a426efb3e574ab2	Bacteria	Bacteroidetes	Flavobacteriia	Flavobacteriales	Flavobacteriaceae
08d4568b79f9cb57259541d3aee781eb	Bacteria	Cyanobacteria	Chloroplast	Stramenopiles
b220c13a0d6740ff5da2e45ed5bfb950	Bacteria	Cyanobacteria	Oscillatoriophycideae	Oscillatoriales	Phormidiaceae	Planktothrix
714be112323a3bc4355501d0ddac0251	Bacteria	Proteobacteria	Gammaproteobacteria
339a3f77df2144a14813a65bf44d8463	Bacteria	Proteobacteria	Alphaproteobacteria	Rhodospirillales	Rhodospirillaceae
5380732d6372b0e846e11622d86bba79	Bacteria	Proteobacteria	Gammaproteobacteria	Pseudomonadales	Pseudomonadaceae
2cbae23f14af7a963b78d65269f4e0c1	Bacteria	Bacteroidetes	Sphingobacteriia	Sphingobacteriales
0b36c352632cb1346cdc7d73f9fb376c	Bacteria	Proteobacteria	Gammaproteobacteria	Pseudomonadales	Pseudomonadaceae	Pseudomonas
f3db585586bae012e49c0880af1aac8b	Bacteria	Actinobacteria	Actinobacteria	Actinomycetales	ACK-M1
6502fcacc541cb84fa90daae75026392	Bacteria	Actinobacteria	Actinobacteria	Actinomycetales
31c10dc8f10983cc9325a87798f94806	Bacteria	Verrucomicrobia	[Pedosphaerae]	[Pedosphaerales]	R4-41B
d7348b86110af99c20176a0c0aa0697a	Bacteria	Cyanobacteria	4C0d-2	MLE1-12
8305d9d9d69fa0ba570c9f0a123d1c2c	Bacteria	Proteobacteria	Alphaproteobacteria	Rhodospirillales	Rhodospirillaceae
c5efb064be95f78eedc44aa3fea8efb6	Bacteria	Proteobacteria	Deltaproteobacteria	MIZ46
80b6df7798b22dde6f51dd49a7a4a48d	Bacteria	Proteobacteria	Alphaproteobacteria	Rhodobacterales	Rhodobacteraceae	Rhodobacter
f0bc65c62a99017dcd039d76236bd653	Bacteria	Proteobacteria	Alphaproteobacteria	Caulobacterales	Caulobacteraceae
d1846621d56307859a8d6c6bf12e33cd	Bacteria	Verrucomicrobia	Opitutae	[Cerasicoccales]	[Cerasicoccaceae]
711f081c1bf01659d13ef033a77941a9	Bacteria	Proteobacteria	Alphaproteobacteria	Rickettsiales
02e2f53ad22208ea596141447c3d6d3f	Bacteria	Proteobacteria	Alphaproteobacteria	Rhodobacterales	Rhodobacteraceae	Rhodobacter
2525cce7e0f7a01030af16fbe7465cb9	Bacteria	Bacteroidetes	Flavobacteriia	Flavobacteriales	Cryomorphaceae	Fluviicola
71dab74886a66f8d105ae7b9011af1c1	Bacteria	Cyanobacteria	Chloroplast	Stramenopiles
feae08080074243344a12135bb67ed48	Bacteria	Verrucomicrobia	[Pedosphaerae]	[Pedosphaerales]	auto67_4W
396b3787848ca962a7fd5027d414a602	Bacteria	Proteobacteria	Gammaproteobacteria	Oceanospirillales
cdfb2c9e02e4f387c02256cafdcbeeec	Bacteria	Proteobacteria	Gammaproteobacteria	Legionellales	Coxiellaceae	Rickettsiella
87129c2dfca144e9853262940180cb49	Bacteria	Proteobacteria	Alphaproteobacteria
6eeac56016f0c8eb423b94d70b212340	Bacteria	Acidobacteria	Acidobacteria-6	iii1-15	mb2424
92be318f0f07d5cfc6ecc0d2d1e8ab0f	Bacteria	Bacteroidetes	Flavobacteriia	Flavobacteriales
764f1165154214933a36f43cae05bff2	Bacteria	Proteobacteria	Alphaproteobacteria	Rickettsiales
ad53576cccb4fb7af5597cb3f5168ab2	Bacteria	Proteobacteria	Betaproteobacteria	Burkholderiales	Comamonadaceae	Limnohabitans	curvus
dd361ff8e55a94f564c69d4c902931ba	Bacteria	Bacteroidetes	Flavobacteriia	Flavobacteriales	Flavobacteriaceae	Flavobacterium
19ea34eba18e85f90f1c035f1f190c8c	Bacteria	Proteobacteria	Alphaproteobacteria	Caulobacterales	Caulobacteraceae
86bf6ba2593a73582d40e0f60762cff8	Bacteria	Proteobacteria	Gammaproteobacteria	Legionellales	Legionellaceae
f4e36f5140f1efd71dcfe632bde1be99	Bacteria	Bacteroidetes	Flavobacteriia	Flavobacteriales	Flavobacteriaceae	Flavobacterium
143fe92e7da7f83aaf362fc2eaf565b1	Bacteria	Verrucomicrobia	Verrucomicrobiae	Verrucomicrobiales	Verrucomicrobiaceae	Prosthecobacter
f43dadc62dfeb01a5dc6bab930da8fe2	Bacteria	Proteobacteria	Betaproteobacteria
12f93fd9b3c0aaf8cde51e7bf0f74809	Bacteria	Gemmatimonadetes	Gemm-2
e7fdc3a6161ae359357405b792272287	Bacteria	Chlorobi	OPB56
945184b6386c192c0066e0a98a154780	Bacteria	Proteobacteria	Gammaproteobacteria	Enterobacteriales	Enterobacteriaceae
67bd9a9de6811d380d06bb849bb989d3	Bacteria	Cyanobacteria	Chloroplast	Stramenopiles
e416d0916760d2fc17b616e2ac3ad855	Bacteria	Proteobacteria	Betaproteobacteria	Methylophilales	Methylophilaceae	Methylotenera	mobilis
12821ca4320ce987692671ed49698823	Bacteria	Proteobacteria	Gammaproteobacteria	Oceanospirillales
369d9ec37fe21575c7ed2d201ab49e41	Bacteria	Bacteroidetes	[Saprospirae]	[Saprospirales]	Saprospiraceae
d3e4200682dd7d4ec88c791ce99de418	Bacteria	Proteobacteria	Alphaproteobacteria	Sphingomonadales	Erythrobacteraceae	Lutibacterium
be04e5a5f333faeeb89b7922cc154ccb	Bacteria	Actinobacteria	Actinobacteria	Actinomycetales	Mycobacteriaceae	Mycobacterium
ce62e47609239ad800a10538cfbcdfe3	Bacteria	Cyanobacteria	Chloroplast	Stramenopiles
fdf458a8bf75577b46f6dd9ea350de51	Bacteria	Proteobacteria	Alphaproteobacteria	Rickettsiales
37039d713cf162569fff657df0aa3db7	Bacteria	Verrucomicrobia	Verrucomicrobiae	Verrucomicrobiales	Verrucomicrobiaceae
c06ccd1f7d57566ef669942328b1a946	Bacteria	Proteobacteria	Gammaproteobacteria	Pseudomonadales	Pseudomonadaceae	Pseudomonas
9302518dc0f83dcb8115a0da465ef86b	Bacteria	Proteobacteria	Alphaproteobacteria	Rickettsiales	mitochondria
66804a3c3e40f8572119e3c624478909	Bacteria	Cyanobacteria	Chloroplast	Stramenopiles
a8461aebe29fae1d18b7b06fbb80ebcd	Bacteria	Bacteroidetes	[Saprospirae]	[Saprospirales]	Saprospiraceae
e5175a883565c1a9e1cb62921bbd4fb0	Bacteria	Cyanobacteria	Chloroplast	Stramenopiles
534392c0b002e6d28584cd12cfcf23c4	Bacteria	Cyanobacteria	Chloroplast	Stramenopiles
6076eddd6fff7320e876df06d707d7b5	Bacteria	Proteobacteria	Alphaproteobacteria	Rickettsiales	mitochondria
a53dd8e7d632f06f64bd3bd4747b2a72	Bacteria	Proteobacteria	Gammaproteobacteria	Oceanospirillales	Halomonadaceae	CandidatusPortiera
e8bf5aff39fc303f8c5d4c6a8dd71ffc	Bacteria	Bacteroidetes	Flavobacteriia	Flavobacteriales
9ce7e697367499c26f59258e4719af51	Bacteria	Bacteroidetes	Cytophagia	Cytophagales	Flammeovirgaceae
d43a95f7bdbfd687e0e997ad06ca2547	Bacteria	Proteobacteria	Gammaproteobacteria	Alteromonadales	OM60
6bd27c79f2f053d5c5f10f9d3fe0f7a9	Bacteria	Acidobacteria	Acidobacteria-6	iii1-15
9a6e6795ff9455c12a7edc9ac9101298	Bacteria	Proteobacteria	Alphaproteobacteria	Rhodospirillales	Rhodospirillaceae
3f19af34207a13e1bd370800c384243e	Bacteria	TM6
edcfb96c9964f3f9dc6f0621861a0b2f	Bacteria	Cyanobacteria	Chloroplast	Stramenopiles
ee60fa74cfed85fc1b068ec55c4c914f	Bacteria	Cyanobacteria	Chloroplast	Stramenopiles
0a714b58e2dff1c534b4be7a8550bec3	Bacteria	Proteobacteria	Deltaproteobacteria	Bdellovibrionales	Bacteriovoracaceae	Peredibacter	starrii
63f795bac9c53369ac0fc7b5ad0310dd	Bacteria	Bacteroidetes	[Saprospirae]	[Saprospirales]	Saprospiraceae	Saprospira
1c2b8892a0d7f828d72808cd01cfd199	Bacteria	Proteobacteria	Alphaproteobacteria	Rhizobiales	Hyphomicrobiaceae	Devosia
76a2e443105acc53d3461f176f38148c	Bacteria	Proteobacteria	Gammaproteobacteria	Alteromonadales	Alteromonadaceae	Cellvibrio
9c3845dea934dab61f85a6661507fa24	Bacteria	Proteobacteria	Deltaproteobacteria	MBNT15
72ff06d7d5fb8729cf51f402d70f9053	Bacteria	Verrucomicrobia	Opitutae	Opitutales	Opitutaceae
7594f38f59d8e84fb104aa1c0b78b56d	Bacteria	Proteobacteria	Alphaproteobacteria	Rhodospirillales	Acetobacteraceae
9ffc43ec363946c10b7c3c0ee609e8ee	Bacteria
baf2f45784ce24686cf168244270132f	Bacteria	Proteobacteria	Alphaproteobacteria	Kiloniellales	Kiloniellaceae
ba5cb035ede71fd21372ed91d9d5b40c	Bacteria	Proteobacteria	Alphaproteobacteria	Rickettsiales
14d0116054d2e60f03267fb780c98c18	Bacteria	Actinobacteria	Nitriliruptoria	Nitriliruptorales	Nitriliruptoraceae
14d871012c77b1e91a346e28d30b8883	Bacteria	Proteobacteria	Alphaproteobacteria
695261201aac8d5f147674e275b4dc18	Bacteria	Bacteroidetes	Flavobacteriia	Flavobacteriales	Cryomorphaceae	Fluviicola
715ed60e859700522eb8ce8e0b100611	Bacteria	Proteobacteria	Alphaproteobacteria	Rickettsiales	Pelagibacteraceae
680aa3a44fcc29b335a83fc9cb7ca987	Bacteria	Cyanobacteria	Chloroplast	Cryptophyta
7580ff42ec296410fd9b751933c26164	Bacteria	Actinobacteria	Acidimicrobiia	Acidimicrobiales	C111
100c2a43ee71e19b2d15def65bbbddf1	Bacteria	Cyanobacteria	Chloroplast
772e09779f3ebd9b6b51126873c0378a	Bacteria	Proteobacteria	Alphaproteobacteria	Rickettsiales	mitochondria	Ochromonas	danica
fc27c909d92c30000f2fce40bdda1cf7	Bacteria	Verrucomicrobia	Opitutae	Puniceicoccales	Puniceicoccaceae	Coraliomargarita
c0b60f6bcb93682457555eb02b53d965	Bacteria	Bacteroidetes	Flavobacteriia	Flavobacteriales	Cryomorphaceae	Fluviicola
669a8cbc4c3018bdd25d7ae1afd409d1	Bacteria	Proteobacteria	Alphaproteobacteria	Rickettsiales	mitochondria
7e403a048ec8502d08dc87d27ebd86c0	Bacteria	Actinobacteria	Acidimicrobiia	Acidimicrobiales	C111
dbbb18489236a080a92626787e624382	Bacteria	Proteobacteria	Gammaproteobacteria	Alteromonadales	Alteromonadaceae
735e9fc92ac3c0978c6ebf1e8ba4f84b	Bacteria	Actinobacteria	Actinobacteria
a21c7012860561e8cf070207974bdc9e	Bacteria	Proteobacteria	Alphaproteobacteria	Rhodospirillales	Rhodospirillaceae
18327f6bf95c7830dd035c9a80f2c944	Bacteria	Cyanobacteria	Chloroplast	Stramenopiles
1906cebeebf6a1d245e871f13bdf7284	Bacteria	Gemmatimonadetes	Gemmatimonadetes	KD8-87
0450b28abc45714f2c2e3b2f30bbb4cf	Bacteria	Bacteroidetes	Flavobacteriia	Flavobacteriales	Flavobacteriaceae
8b7ba0417c04b1d8884a0d23fd739807	Bacteria	Proteobacteria	Alphaproteobacteria	Rickettsiales	mitochondria
2a0e81bcec476d431d9a3c840cc7c882	Bacteria	Proteobacteria	Alphaproteobacteria	Rickettsiales	mitochondria
b4154677c5f887540c422878cd57bc88	Bacteria	Proteobacteria	Alphaproteobacteria
c9eeb9179e405b1fd7846a8aefb864d1	Bacteria	Bacteroidetes	Flavobacteriia	Flavobacteriales	Cryomorphaceae	Fluviicola
ffd660f96ba6668b2d8d86fc4e150862	Bacteria	Bacteroidetes	Sphingobacteriia	Sphingobacteriales
3c8a9630951999d2b809868618b05848	Bacteria	Proteobacteria	Alphaproteobacteria	Rhodobacterales	Rhodobacteraceae
dd3feb8bca4f233f9df1a182c90ff495	Bacteria	Cyanobacteria	Chloroplast	Stramenopiles
07f99fb784f40642f9713e217b9008d1	Bacteria	Proteobacteria	Alphaproteobacteria	Rickettsiales
722d90b4d8cd75783d8f72dba7d98990	Bacteria	Planctomycetes	vadinHA49
f50ad61a58c377f95b85f92d99bef694	Bacteria	Proteobacteria	Gammaproteobacteria	Alteromonadales	Alteromonadaceae
8c2b832dd5491a40a79aea2525e54341	Bacteria	Proteobacteria	Gammaproteobacteria	Alteromonadales	OM60
d71daaac8e969973bdcb093d80cb2120	Bacteria	Bacteroidetes	Flavobacteriia	Flavobacteriales	Flavobacteriaceae	Flavobacterium
4d41a4ed03379c7d2cefbecb9f1f5445	Bacteria	Proteobacteria	Betaproteobacteria
33089d0f8706717f3ed8584f42026164	Bacteria	Proteobacteria	Betaproteobacteria	Thiobacterales	Thiobacteraceae
270460c5276511b5f9bde34023fbfd3f	Bacteria	Verrucomicrobia	Verrucomicrobiae	Verrucomicrobiales	Verrucomicrobiaceae
9ab3a54e5cefa6a766fde0d8c304769f	Bacteria	Bacteroidetes	Sphingobacteriia	Sphingobacteriales
761e987e9cff3fbfbe5298dd19dacc3e	Bacteria	Proteobacteria	Alphaproteobacteria	Rhizobiales	Hyphomicrobiaceae	Hyphomicrobium
bc210d595c23db321d9394bdc0162ab4	Bacteria	Proteobacteria	Alphaproteobacteria	Rhizobiales
e0f851834109c7fbf1a1c8b6d9fd4687	Bacteria	Proteobacteria	Alphaproteobacteria	Rhodospirillales	Acetobacteraceae
d50ddb56e7b32ca8f542f01ae9c7196a	Bacteria	Verrucomicrobia	Opitutae	[Cerasicoccales]	[Cerasicoccaceae]
878e76530d10cbd94c7a7ceeebd7eba5	Bacteria	Proteobacteria	Betaproteobacteria
87f7b9254c4136c088ed7078e9d32241	Bacteria	Cyanobacteria	Chloroplast	Stramenopiles
ec5abb0a31e9b17a634c132fdf72b153	Bacteria	Bacteroidetes	Flavobacteriia	Flavobacteriales	Flavobacteriaceae	Flavobacterium	frigidarium
ad72127c01dac114c005c83404612b5d	Bacteria	Proteobacteria	Alphaproteobacteria	Caulobacterales	Caulobacteraceae	Mycoplana
4856e07a21f6a60b639fa9c694687d95	Bacteria	Proteobacteria	Alphaproteobacteria	Sphingomonadales	Sphingomonadaceae	Sphingobium
3004b5b1b795ff372412e90d6b1295a7	Bacteria	Proteobacteria	Alphaproteobacteria	Rhodobacterales	Rhodobacteraceae
1edf5cee5aa0c3e759f03fcc77271155	Bacteria	Proteobacteria	Alphaproteobacteria	Rickettsiales
d51ab712dd66c71a0e5570a034b61dea	Bacteria	Proteobacteria	Alphaproteobacteria	Rhizobiales
9f6e210f6ea7ccc38fb144d2b0698a8d	Bacteria	Proteobacteria	Alphaproteobacteria	Rickettsiales	mitochondria
5ad0530de437d66995ad035ce72ceeb0	Bacteria	Bacteroidetes	Flavobacteriia	Flavobacteriales	Cryomorphaceae	Fluviicola
6bd4d5b61cc05486913af0cc23381e54	Bacteria	Bacteroidetes	Flavobacteriia	Flavobacteriales	Cryomorphaceae
67e25ce18a309457db1ac4e730de7bf8	Bacteria	Proteobacteria	Gammaproteobacteria	Pseudomonadales	Moraxellaceae	Psychrobacter
7cab98bbf9568338722f9e5a53737169	Bacteria	Proteobacteria	Gammaproteobacteria	Legionellales	Legionellaceae
f5e83ee563824551767adec435300d1f	Bacteria	Cyanobacteria	Chloroplast	Stramenopiles
e6d2abb15c6e15681bc4c11068d7808a	Bacteria	Proteobacteria	Gammaproteobacteria	Thiotrichales	Piscirickettsiaceae
607e292fa24dbfaf2cc3a23b6d7b1b4e	Bacteria	Proteobacteria	Alphaproteobacteria	Rickettsiales	mitochondria
962149fa071b9d07582495ab76c42154	Bacteria	Gemmatimonadetes	Gemmatimonadetes	Gemmatimonadales	Gemmatimonadaceae	Gemmatimonas
a0c91714eb1a5d265a8f05101d8020a5	Bacteria	Proteobacteria	Gammaproteobacteria	Alteromonadales	OM60
7661ccccb867f328950058a8c099463e	Bacteria	Cyanobacteria	Chloroplast	Haptophyceae
5bf1031d39b4a422151f681aa873fd86	Bacteria	Proteobacteria	Gammaproteobacteria	Alteromonadales	Alteromonadaceae
97f11250c8f8468350d64d2e1fcc05ff	Bacteria	Proteobacteria	Alphaproteobacteria	Rhizobiales
31fb49d7319338818e5c561cc3e8f134	Bacteria	Proteobacteria	Alphaproteobacteria	Rickettsiales	Rickettsiaceae
5546125333287c44ae1727f3d5b96eb6	Bacteria	Proteobacteria	Gammaproteobacteria	Legionellales	Legionellaceae	Legionella
1bd9ea3619c2c802312dae4d6701513f	Bacteria	Proteobacteria
f9c1c7de158ab4d555ec46bec26478f1	Bacteria	Bacteroidetes	Flavobacteriia	Flavobacteriales	Flavobacteriaceae	Flavobacterium
01c071fe83cce6cf3f04cb51a16f6cf9	Bacteria	Cyanobacteria	Chloroplast	Chlorophyta	Mamiellaceae
70958f929499a0204b0f4f6051dd5072	Bacteria	Proteobacteria	Alphaproteobacteria	Rhodospirillales	Rhodospirillaceae
6dcaed843ae909db228fd7825d3a8864	Bacteria	PAUC34f
2aee17e668dd944e7792d625ec479fcf	Bacteria	Proteobacteria	Alphaproteobacteria	Rhodospirillales	Rhodospirillaceae
63afe8e6aac58bf0d670a82ca5bc574c	Bacteria	Proteobacteria	Gammaproteobacteria	Enterobacteriales	Enterobacteriaceae
6b9e593a501170ae935ff05e92512021	Bacteria	Proteobacteria	Alphaproteobacteria	Rickettsiales	mitochondria
d5df79e90f8f402a66e74da0a6c47a11	Bacteria	Actinobacteria	Actinobacteria	Actinomycetales	Microbacteriaceae	CandidatusAquiluna	rubra
f9806851ff6c92491e477eaefc0f9a38	Bacteria	Proteobacteria	Alphaproteobacteria	Rickettsiales
04bfa26b3209850428c4ae09b1d4f4b8	Bacteria	Proteobacteria	Alphaproteobacteria	Rhizobiales
ed796c2d7980f60f0d56d04fb6083cc3	Bacteria	Proteobacteria	Betaproteobacteria	Burkholderiales	Alcaligenaceae
63eb15027711090a0a263be7532edebd	Bacteria	Bacteroidetes	[Saprospirae]	[Saprospirales]	Chitinophagaceae	Sediminibacterium
e7ad1e3a46810d8669c95fef31579271	Bacteria	Bacteroidetes	Bacteroidia	Bacteroidales
98af7ce2441e1836a5fc973fd831b5f6	Bacteria	Proteobacteria	Gammaproteobacteria	Oceanospirillales	Halomonadaceae	CandidatusPortiera
593bde65164a2609a7ff0133cd975900	Bacteria	Cyanobacteria	Chloroplast	Stramenopiles
aad1265ce3697aba33e05e954262a240	Bacteria	Proteobacteria	Gammaproteobacteria	[Marinicellales]	[Marinicellaceae]
d0d7d96f0a1bfcb444ca981d70b68dd9	Bacteria	Cyanobacteria	Synechococcophycideae	Synechococcales	Synechococcaceae	Synechococcus
eb89407ff0b336f24ed047144563dd50	Bacteria	Actinobacteria	Actinobacteria	Actinomycetales
710ce684c65361504403d8cd2d841fa8	Bacteria	Actinobacteria	Actinobacteria
8693216da01a75f2a374a093665476ec	Bacteria	Proteobacteria	Alphaproteobacteria	Rhodospirillales	Rhodospirillaceae
fb9358e4192b4e3fb1a6210327ee6ff2	Bacteria	Proteobacteria	Alphaproteobacteria	Sphingomonadales	Sphingomonadaceae	Novosphingobium
0b95de0e43a3e4c87341ce6625c37107	Bacteria	Cyanobacteria	4C0d-2	MLE1-12
36ce1c251a308c0f7a6be03f20ecf070	Bacteria	Proteobacteria	Betaproteobacteria	Burkholderiales	Comamonadaceae
72c63bca07d9dfb5f8d1afa93e78da18	Bacteria	Proteobacteria	Alphaproteobacteria	Rhodospirillales	Rhodospirillaceae
687e1d94d2bfc46843a21e7706df067e	Bacteria	Cyanobacteria	Chloroplast
4ad8b6d4eedc32b7b87887de737c75e7	Bacteria	Verrucomicrobia	[Pedosphaerae]	[Pedosphaerales]	R4-41B
0b1de418940c4cbe3debb10167758e8f	Bacteria	Proteobacteria
af30685ec187ce235db722de69a498a6	Bacteria	Proteobacteria	Gammaproteobacteria	Alteromonadales	211ds20
57a028186bafb0607e11c25759123652	Bacteria	Actinobacteria	Actinobacteria	Actinomycetales	Microbacteriaceae
79c9235ff041fe76f6dc89a18c5a222a	Bacteria	Bacteroidetes	[Saprospirae]	[Saprospirales]	Chitinophagaceae
81d3646d7769dcb18f836cb2e849f76e	Bacteria	Bacteroidetes	Flavobacteriia	Flavobacteriales	Cryomorphaceae	Fluviicola
836a3884be034c3109f25ca107f5fd0f	Bacteria	Bacteroidetes	Bacteroidia	Bacteroidales
f8aeec3c1ff0f4e7e1c829e4db0618d9	Bacteria	Proteobacteria	Gammaproteobacteria	Pseudomonadales	Pseudomonadaceae	Pseudomonas	veronii
4a2b40b6fd08afc1486f306ec8083f2a	Bacteria	Proteobacteria	Alphaproteobacteria	Rickettsiales
803e9dc8e8c4c4fd8c7e399c8eb89a5c	Bacteria	Bacteroidetes	Flavobacteriia	Flavobacteriales
6107feed8d202981b5e39e244bb4b3cc	Bacteria	Actinobacteria	Actinobacteria	Actinomycetales
09de3dde6c465b74bcb8e6f8a478e4e0	Bacteria	Actinobacteria	Actinobacteria	Actinomycetales	Nocardiaceae	Rhodococcus	fascians
7eb1e4ce120d3349868baed5b44dab1a	Bacteria	Bacteroidetes	[Saprospirae]	[Saprospirales]	Chitinophagaceae
ab490fa500fee3d905e96b58698a458d	Bacteria	Bacteroidetes	Flavobacteriia	Flavobacteriales	Cryomorphaceae	Fluviicola
9860b6ac5a594b06bf4a81c4fbd0b444	Bacteria	Proteobacteria	Alphaproteobacteria	Rickettsiales	mitochondria
8a319f2031debadb73f2bd35fb2dc81e	Bacteria	Cyanobacteria	Chloroplast	Stramenopiles
d3c5b787f0ca71a9b39ff87ee8733a30	Bacteria	Bacteroidetes	Bacteroidia	Bacteroidales
465507064110c3c6effce50e45589224	Bacteria	Chlamydiae	Chlamydiia	Chlamydiales	Rhabdochlamydiaceae	CandidatusRhabdochlamydia
9663d0de58de2e4a43a4ca065517dc5a	Bacteria	Verrucomicrobia	[Pedosphaerae]	[Pedosphaerales]
f68086e9e9292831ce6ee3f2203e6941	Bacteria
1c3bae25df9dffaf2d84ed4c96d7c732	Bacteria	Proteobacteria	Betaproteobacteria
c4b94e3febac5895c6cdede30ba1a333	Bacteria	Proteobacteria	Alphaproteobacteria	Rhodospirillales	Rhodospirillaceae
0b867bdc982ffa6946c7317e1535f5d8	Bacteria	Proteobacteria	Deltaproteobacteria	Myxococcales
cfe9468afec04aa6a53affeb5965852c	Bacteria	Bacteroidetes	Flavobacteriia	Flavobacteriales	Flavobacteriaceae	Flavobacterium	gelidilacus
987027dc44208ccada49fa8ca6ab884a	Bacteria	Proteobacteria	Betaproteobacteria
82898097131cfe8495c02958a0ecf808	Bacteria	Proteobacteria	Gammaproteobacteria	Pseudomonadales	Pseudomonadaceae	Pseudomonas
5958fd2b7ec972907e061e8f4d0c49b8	Bacteria	Acidobacteria	RB25
c8487b182705eaad35c8578b81969d20	Bacteria	Proteobacteria	Alphaproteobacteria	Rhodobacterales	Rhodobacteraceae
c2d7bdee98e583cd4c751ab1c5b79a42	Bacteria	Proteobacteria	Alphaproteobacteria	Rickettsiales
6443898054518f4a3520abd88ae8a640	Bacteria	Actinobacteria	Actinobacteria	Actinomycetales
72cfb5d7d1b5ad5021e66ce783b47570	Bacteria	Verrucomicrobia	Verrucomicrobiae	Verrucomicrobiales	Verrucomicrobiaceae	Luteolibacter
1b616fbb0f3fed9781ee8b4ca66e6b2e	Bacteria	Proteobacteria	Deltaproteobacteria	Desulfobacterales	Nitrospinaceae	Nitrospina
5395cf9d11c88c5a47b933b199fb99bb	Bacteria	Bacteroidetes	Flavobacteriia	Flavobacteriales	Cryomorphaceae	Fluviicola
a2055b3390cdb59e8f4cdb9701fca01b	Bacteria	Verrucomicrobia	[Pedosphaerae]	[Pedosphaerales]
216dcb08cda10e8b3b1349aef3c76620	Bacteria	Proteobacteria	Gammaproteobacteria	Oceanospirillales	Halomonadaceae	CandidatusPortiera
a88f20e5316581a013745e290c1b0fe3	Bacteria	Verrucomicrobia	[Spartobacteria]	[Chthoniobacterales]	[Chthoniobacteraceae]	CandidatusXiphinematobacter
77496d8edbb6b7575c1b80604525d2f2	Bacteria	Bacteroidetes	Cytophagia	Cytophagales	Cytophagaceae
7637218982e4f4ffcd749c743f7a0fbc	Bacteria	Proteobacteria	Gammaproteobacteria	Chromatiales
e75b64d9a241f71d7874c5b4e6007719	Bacteria	Proteobacteria	Alphaproteobacteria	Rickettsiales	mitochondria
26dbef51cdba97c1f8b84a235ea06f3c	Bacteria	Proteobacteria	Alphaproteobacteria	Sphingomonadales	Sphingomonadaceae	Sphingomonas	wittichii
80047f897e7e3514c11be04138f27b8f	Bacteria	Proteobacteria	Alphaproteobacteria	Rickettsiales	mitochondria
db32dd77878a4d7c2b52a2ea4a1941f8	Bacteria	Proteobacteria	Betaproteobacteria	Nitrosomonadales	Nitrosomonadaceae
34b93394ad2057aa52c4ca717f1bf4a1	Bacteria	Proteobacteria	Deltaproteobacteria	Myxococcales
d039c7965ba3b0c0d787496636a9f468	Bacteria	Bacteroidetes	Cytophagia	Cytophagales	Cytophagaceae
e94f54359c805136a42c50ed84bcba23	Bacteria	Proteobacteria	Alphaproteobacteria	Rickettsiales	mitochondria
8f23fdcf6f94f67605d968b6e4a61a01	Bacteria	Actinobacteria	Actinobacteria	Actinomycetales	ACK-M1
b912f358c8bc46e3ec07af22b44a1aa4	Bacteria	Proteobacteria	Alphaproteobacteria	Rickettsiales	mitochondria
d8d7cf4435278fa08ae44159e7f1e544	Bacteria
58fb1313483b75a94469368eafbc28f8	Bacteria	Bacteroidetes	Cytophagia	Cytophagales	Cytophagaceae
0bcc144085d17cb32ece4848809d7fb1	Bacteria	Cyanobacteria	Chloroplast	Stramenopiles
8f5c445dc468dce73bc506e65c82cdf7	Bacteria	Cyanobacteria	Chloroplast	Stramenopiles
07018685767d59b63be478c31e512db2	Bacteria	Proteobacteria	Gammaproteobacteria	Alteromonadales	HTCC2188	HTCC
f36c50279a8fa1c121cb9dda1ab1cb42	Bacteria	Proteobacteria	Betaproteobacteria	Burkholderiales	Comamonadaceae
723d06bab6225f80c683c38c5610799b	Bacteria	Planctomycetes	Phycisphaerae	Phycisphaerales
13df026429287ac25e3892dd1c4483b3	Bacteria	Proteobacteria	Gammaproteobacteria	Chromatiales
857c31050a6706553523ba04ae510fde	Bacteria	Bacteroidetes	[Rhodothermi]	[Rhodothermales]	[Balneolaceae]
c3dc89741dfcf91fff80a6b385f9a10e	Bacteria	Bacteroidetes	Sphingobacteriia	Sphingobacteriales
8612a638846acf832935cb932a1f0398	Bacteria	Bacteroidetes	Flavobacteriia	Flavobacteriales	[Weeksellaceae]	Cloacibacterium
449491972236441cb634b0303c6b74a0	Bacteria	Cyanobacteria	Chloroplast	Cryptophyta
65e5d5b5c6c7001ef5c3b8f58ce2047b	Bacteria	Proteobacteria	Alphaproteobacteria
4e2d0baae4086a5f74e74e70bb12bf03	Bacteria	Cyanobacteria	Chloroplast	Stramenopiles
3acc95393d89441707460df278134bd5	Bacteria	Proteobacteria	Gammaproteobacteria	Thiotrichales	Piscirickettsiaceae
308bd483d130fe0ef774c3838b8fe46a	Bacteria	Proteobacteria	Alphaproteobacteria	Rhodospirillales	Rhodospirillaceae
c6010dd96bfef3e20e29984215a5508f	Bacteria	Bacteroidetes	Flavobacteriia	Flavobacteriales	Flavobacteriaceae	Flavobacterium
f025e1b7e9951d68b76e3d575a3be226	Bacteria	Proteobacteria	Alphaproteobacteria	Sphingomonadales	Erythrobacteraceae
d375f4663bd181ca833f256d6abae8f6	Bacteria	Proteobacteria	Alphaproteobacteria	Rickettsiales	mitochondria
eda2b8bb3725cfac8bb7a085428ae7b4	Bacteria	OD1
71095e2bbc44786d745a841fc64ef190	Bacteria	Bacteroidetes	[Saprospirae]	[Saprospirales]	Chitinophagaceae	Sediminibacterium
c45a73594d5ea1eeeee56c28b31ceb63	Bacteria	Cyanobacteria	Chloroplast	Stramenopiles
47c761ef12da459ce4a632c552e1a5c3	Bacteria	OD1
9ac3bb1d7dedb08a012692a6f536b5af	Bacteria	Proteobacteria	Alphaproteobacteria	Sphingomonadales	Sphingomonadaceae	Sphingomonas
59122b542440ef71e3074678098192d1	Bacteria	Proteobacteria	Betaproteobacteria	Procabacteriales	Procabacteriaceae
0527eb4b511f4ad7ed923ef86068c981	Bacteria	Cyanobacteria	Chloroplast	Stramenopiles
d350ed02e3e8ac5ff62590f2f6fa3906	Bacteria	Proteobacteria	Gammaproteobacteria
233f4984b368c629dce62662fbf10513	Bacteria	Cyanobacteria	Chloroplast	Chlorophyta
49b1e29a932665ef776025099e70c23e	Bacteria
3509d7fff229ce1ed02e36c4ce288fe8	Bacteria	Proteobacteria
5c6f10d1eeb49f3720372509d7542313	Bacteria	Proteobacteria	Betaproteobacteria	MND1
d813664e2a131ccc9f5ea2c5ae96c139	Bacteria	Cyanobacteria	Chloroplast	Cryptophyta
7dbf8044196ea8cc894577991fee5afb	Bacteria	Chlorobi	Ignavibacteria	Ignavibacteriales	Ignavibacteriaceae
21b6def07419f4dddd70dadd154b5a3a	Bacteria	Cyanobacteria	Chloroplast	Stramenopiles
c28ae5263c92190509c617f64332269c	Bacteria	Chloroflexi	Anaerolineae	Caldilineales	Caldilineaceae
f34ad18a6fc24f4f3ab71cdf6680dc09	Bacteria	Proteobacteria	Betaproteobacteria
07b272bad289b3175196afb876ba70e7	Bacteria	Cyanobacteria	Chloroplast	Stramenopiles
76953c5e4dc735db92129b596f2160e9	Bacteria	Actinobacteria	Thermoleophilia	Solirubrobacterales
da9a696622460e4818764ff29ce9c87c	Bacteria	Cyanobacteria	Chloroplast	Stramenopiles
8486668584650c491a5e6ffb7ada8c4f	Bacteria	Verrucomicrobia	Opitutae	[Cerasicoccales]	[Cerasicoccaceae]
60f6746a820cc1155b3b222db1bbd247	Bacteria	Proteobacteria	Betaproteobacteria	Burkholderiales	Comamonadaceae	Hydrogenophaga
e215e862bc4bc45d1db165e07ba72a81	Bacteria	Bacteroidetes	Flavobacteriia	Flavobacteriales	Cryomorphaceae	Fluviicola
05b18ec772b1068d4e5af85a64eaed0f	Bacteria	Actinobacteria	Actinobacteria	Actinomycetales	Dermabacteraceae	Brachybacterium
f10f9afa09df303dbb43cc1d1dae205e	Bacteria	Proteobacteria
650f09b32e9acb89e816a96dc7d76e43	Bacteria	Proteobacteria	Alphaproteobacteria	Rhodospirillales	Acetobacteraceae
3cdd6aee5bd569a7d3cbdfe1307bd666	Bacteria	Proteobacteria	Betaproteobacteria	SC-I-84
0814abf2c6d50d8eeea04ae5872d00d2	Bacteria	Planctomycetes	Planctomycetia	Planctomycetales	Planctomycetaceae	Planctomyces
09aabdf92e4b2fbc188048a4fc58c4f0	Bacteria	Proteobacteria	Betaproteobacteria	Thiobacterales	Thiobacteraceae
75dd2f40598063c73360638a0493c913	Bacteria	Proteobacteria	Gammaproteobacteria	Alteromonadales
9373b7e134e498fc1eb3041203f51dfa	Bacteria	Proteobacteria	Deltaproteobacteria	Desulfuromonadales	Desulfuromonadaceae
3b6fd7be1d9b5827f77b4942a55be2e3	Bacteria	Proteobacteria	Alphaproteobacteria	Sphingomonadales	Sphingomonadaceae
1727bd8544639e521c5efff9f8c225a6	Bacteria	Proteobacteria	Deltaproteobacteria	Myxococcales	0319-6G20
ca1cc06fc59a7f6e68b18299f108897e	Bacteria	GN02	BD1-5
1cb3558d8e931cbfe4138dc6111e0892	Bacteria	Planctomycetes	Planctomycetia	Planctomycetales	Planctomycetaceae	Planctomyces
ae67bceddae447e7dade752a5a28d6f3	Bacteria	Bacteroidetes	Sphingobacteriia	Sphingobacteriales
282d970c7e74112691085e63921dbcfd	Bacteria	Bacteroidetes	[Saprospirae]	[Saprospirales]	Chitinophagaceae	Sediminibacterium
5253d98d25bc51baaf939f468ca8ef59	Bacteria	Bacteroidetes	Sphingobacteriia	Sphingobacteriales	Sphingobacteriaceae	Pedobacter	composti
7957945c5dd5768b643dc5b17194dc91	Bacteria	Cyanobacteria	4C0d-2	MLE1-12
abb3d31ed1c1f986ddb94d51af8e67ef	Bacteria	Proteobacteria	Betaproteobacteria	Burkholderiales	Oxalobacteraceae
cdcc3afd3d944a689480601359e3c039	Bacteria	Verrucomicrobia	Opitutae	Opitutales	Opitutaceae	Opitutus
c86c982e36ad59e0888e175fdf963e8c	Bacteria	Bacteroidetes	Cytophagia	Cytophagales	Cytophagaceae
cbde5fe4b37d4fa108f6e609ad159a6e	Bacteria	Proteobacteria	Gammaproteobacteria	Legionellales	Legionellaceae
c4e16e2ca85ff9eb360fd895f75227ca	Bacteria	Planctomycetes	Planctomycetia	Gemmatales	Isosphaeraceae
13c58fc74653f2e7e76a6cbc7de4b77f	Bacteria	Proteobacteria	Gammaproteobacteria	Thiotrichales	Piscirickettsiaceae
a5c95d5f2fc8a4037c6c735708c253bd	Bacteria	Bacteroidetes	[Saprospirae]	[Saprospirales]	Saprospiraceae
74d9e554e4535a1e96c2b94b843d05a8	Bacteria	Proteobacteria	Deltaproteobacteria	Bdellovibrionales	Bacteriovoracaceae	Peredibacter	starrii
67a9f679e9205f94c0c3b17c512e5cc1	Bacteria	Proteobacteria
9e3e6a1c58d9855cfe90dccf262ac1df	Bacteria	Cyanobacteria	Oscillatoriophycideae	Chroococcales	Gomphosphaeriaceae	Snowella
79cb0502666fb336451226c33970ec67	Bacteria	Bacteroidetes	[Saprospirae]	[Saprospirales]	Chitinophagaceae	Sediminibacterium
96cc3f44dde7538806818159372afdf5	Bacteria	Bacteroidetes	Flavobacteriia	Flavobacteriales	Cryomorphaceae	Fluviicola
382df3e0baaef58683f1815a6dd0082f	Bacteria	Planctomycetes	Planctomycetia	Gemmatales	Isosphaeraceae
bf8ce7fa47bc4d1c476efc8a0290ee9b	Bacteria	Proteobacteria	TA18	PHOS-HD29
b09354fcb7e062e6a690bdaf8360306f	Bacteria	Proteobacteria	Alphaproteobacteria	Rhizobiales	Bradyrhizobiaceae	Bradyrhizobium
edab60a0874cc7cdbd6b175d7c0e57da	Bacteria	Actinobacteria	Actinobacteria	Actinomycetales	Microbacteriaceae	CandidatusRhodoluna
ad8664f21c744d16b06f829014b5511c	Bacteria	Actinobacteria	Actinobacteria	Actinomycetales	Mycobacteriaceae	Mycobacterium
70b7e370ff035670872a65fb072d6cb2	Bacteria	Proteobacteria	Alphaproteobacteria	Rhizobiales
c56d12a1a6c69c8fd5e83bc51aa7b741	Bacteria	Proteobacteria	Alphaproteobacteria
02502365f831e3f6a47f1bb38b6a7dce	Bacteria	Proteobacteria	Alphaproteobacteria
940f895b77a891622360a59a2bc48a9a	Bacteria	Actinobacteria	Actinobacteria	Actinomycetales
7ae58cef0c604ff91fb871b3ad579da0	Bacteria	Proteobacteria	Alphaproteobacteria	Sphingomonadales	Sphingomonadaceae	Novosphingobium
8219cb35411cc09621c59ce542f56618	Bacteria	Bacteroidetes	Flavobacteriia	Flavobacteriales	Cryomorphaceae
f9117bde133ad80998f6d4424a51f659	Bacteria	Verrucomicrobia	Verrucomicrobiae	Verrucomicrobiales	Verrucomicrobiaceae	Luteolibacter
cf3381318906e1e08f58bca905636dc0	Bacteria	Proteobacteria	Alphaproteobacteria	Rhizobiales
de9ecb6e0b12682e550a5a26d10a1c34	Bacteria	Verrucomicrobia	[Pedosphaerae]	[Pedosphaerales]	R4-41B
9cfbccc48b63a139f7c2f3aa3cd75667	Bacteria	Bacteroidetes	Flavobacteriia	Flavobacteriales	Flavobacteriaceae	Psychroserpens
69f3971f2ea9b2410b6a782509755591	Bacteria	Proteobacteria	Alphaproteobacteria	Rhizobiales	Hyphomicrobiaceae
4bfc8d33ec5b05c7f11f6b8968679c7a	Bacteria	Acidobacteria	Acidobacteria-6	CCU21
b42b86c7b8ea96e0b8b3a46d2a795433	Bacteria	Proteobacteria	Betaproteobacteria	Burkholderiales	Comamonadaceae
345c308f76539edd9e91d297e2d97c13	Bacteria	Proteobacteria	Alphaproteobacteria	Caulobacterales	Caulobacteraceae	Phenylobacterium
a5a863de56cfdae30ea31ce2e5bbab46	Bacteria	Proteobacteria	Gammaproteobacteria	Alteromonadales	Shewanellaceae	Shewanella
d6efd2da2728fd74ded268122ee05036	Bacteria	Proteobacteria	Alphaproteobacteria	Sphingomonadales	Sphingomonadaceae	Sphingomonas
a9cdace376f468b22ea7bac7de7e029c	Bacteria	Proteobacteria	Deltaproteobacteria	MBNT15
31f20c3931224b09384294ad9a2bd3b3	Bacteria	Proteobacteria	Gammaproteobacteria	Chromatiales
325ca3f3ba51640e49bf61e7fc6a24f4	Bacteria	Actinobacteria	Actinobacteria	Actinomycetales	Microbacteriaceae	Clavibacter
88f5f318c8c42662f58fbe678485cd75	Bacteria	Verrucomicrobia	[Spartobacteria]	[Chthoniobacterales]	[Chthoniobacteraceae]	CandidatusXiphinematobacter
c454a1f3380b1ddd6d5497ea28a26b0b	Bacteria	Proteobacteria	Betaproteobacteria	Burkholderiales	Oxalobacteraceae
ae813b782cc38d6d1866bf9a15c0355f	Bacteria	Proteobacteria	Alphaproteobacteria	Rickettsiales	mitochondria
83eced49693cd485eea432d2f3a8b572	Bacteria	Bacteroidetes	Flavobacteriia	Flavobacteriales	Flavobacteriaceae	Flavobacterium
6497a6287c5db2488adee4ea8e39ab10	Bacteria	Bacteroidetes	Bacteroidia	Bacteroidales
67015d16d2d2b9d49384ca6ef960dea1	Bacteria	Cyanobacteria	Chloroplast	Haptophyceae
55bfce25a2269818de17ac30199fc72a	Bacteria	Proteobacteria	Betaproteobacteria	Ellin6067
1ab00f6d5c276854565f999600a5f108	Bacteria	Actinobacteria	Actinobacteria	Actinomycetales	Mycobacteriaceae	Mycobacterium
64b4d0d88bb5c47e2f9c3ca4c04d03dc	Bacteria	Proteobacteria	Alphaproteobacteria	Rhodospirillales	Rhodospirillaceae
7a10f4c4c85b1e821ae02f9273f98afd	Bacteria	Actinobacteria	Actinobacteria	Actinomycetales
ef51a1358e07f6a2e28b05a19cfbf8b2	Bacteria	Proteobacteria	Alphaproteobacteria	Rickettsiales	mitochondria
c282af9d460ccf513c084fcf13656bf9	Bacteria	Cyanobacteria	Chloroplast
f883d7351501cf6935a4f9273c6d7f24	Bacteria	Proteobacteria	Alphaproteobacteria	Rhodospirillales	Rhodospirillaceae
17f62a7d2532a6ae25abffb699db3cc4	Bacteria	Verrucomicrobia	[Pedosphaerae]	[Pedosphaerales]	R4-41B
17043869c4ff2e6f92adf95b4310c53c	Bacteria	Proteobacteria	Gammaproteobacteria	Xanthomonadales	Sinobacteraceae
8c57fa8754336850c1b38cbc182c4ffd	Bacteria	Cyanobacteria	Chloroplast	Stramenopiles
037a28cd59b092dbfef24cef2f396b0e	Bacteria	Proteobacteria	Alphaproteobacteria	Rickettsiales
ddcc20fc60ff84b4e1b67934b3a00546	Bacteria	Proteobacteria	Betaproteobacteria	Burkholderiales	Comamonadaceae	Hydrogenophaga
ff3e944de3075f244c9daf2a420e26d1	Bacteria	Proteobacteria	Betaproteobacteria	Burkholderiales	Oxalobacteraceae	Polynucleobacter
d19c6a81f5ab45c83b556c3d9d51da6d	Bacteria	Bacteroidetes	Flavobacteriia	Flavobacteriales	Flavobacteriaceae	Lutibacter	maritimus
22c1deea013eea2c8cd10547e7fd70ef	Bacteria	Cyanobacteria	Chloroplast	Stramenopiles
b07d70c74fd722dd06caec8bf7b26bff	Bacteria	Proteobacteria	Alphaproteobacteria	Rhodospirillales	Rhodospirillaceae
b232ac13d7342a28beee14b435c98358	Bacteria	Proteobacteria	Alphaproteobacteria	Rhodobacterales	Rhodobacteraceae	Anaerospora
38dc6e6ae2d9af2eeb74e523f1bcd437	Bacteria	Proteobacteria	Alphaproteobacteria
5b9106f4a290708b7321aa04a4e935af	Bacteria	Proteobacteria	Alphaproteobacteria	Rhizobiales
8a6f5547b287222c15d9e9d8eca5ac1e	Bacteria	Actinobacteria	Acidimicrobiia	Acidimicrobiales	C111
f6ad51de5a7c63bd889ebaebc7b84857	Bacteria	Proteobacteria	Betaproteobacteria	Burkholderiales	Comamonadaceae	Hydrogenophaga
0e4324eee7005e82de8f34a668a35d53	Archaea	Crenarchaeota	Thaumarchaeota	Cenarchaeales	Cenarchaeaceae	Nitrosopumilus
2e193e82e7000acd47ce00bdd77ed4e0	Bacteria	Actinobacteria	Actinobacteria	Actinomycetales	Microbacteriaceae	Clavibacter
0ea6bee08c087805c6ca5e638c12a71f	Bacteria	Proteobacteria	Betaproteobacteria	Methylophilales	Methylophilaceae
013d1fc9469940670d2e3b52068bbb6b	Bacteria	Bacteroidetes	Flavobacteriia	Flavobacteriales	Cryomorphaceae
cd93017c92a76a9ce9abbee5f54f88bb	Bacteria	Bacteroidetes	Flavobacteriia	Flavobacteriales	Flavobacteriaceae	Flavobacterium	succinicans
4ab35edd468094d16b50cd1556275c8d	Bacteria	Proteobacteria	Gammaproteobacteria	Chromatiales
d1e7069c930bb4790713681f06f84cf0	Bacteria	Proteobacteria	Gammaproteobacteria	Alteromonadales	[Chromatiaceae]	Rheinheimera
1446f495c3da2bfa613e77f7edf77f72	Bacteria
2412eebd6bfdfa9814e463b5c3043e8b	Bacteria	Proteobacteria	Gammaproteobacteria	Oceanospirillales	Oceanospirillaceae	Marinomonas	primoryensis
69523997146ff118c5658b480510e7b3	Bacteria	Proteobacteria	Alphaproteobacteria	Rickettsiales
88775cd81f1570321d972c1c88061ff1	Bacteria	Bacteroidetes	[Saprospirae]	[Saprospirales]	Saprospiraceae	Saprospira
c6298915b36c9ac93677f11eea0764eb	Bacteria	Proteobacteria	Deltaproteobacteria	Myxococcales	OM27
56c2fedf17d023b0469224f4ffdd046f	Bacteria	Acidobacteria	Acidobacteria-6	iii1-15
f0dce73a394fa43b468405fad5c5e748	Bacteria	Bacteroidetes	[Saprospirae]	[Saprospirales]	Chitinophagaceae
8a29946a1040a8af540f534c4644e6f5	Bacteria	Proteobacteria	Alphaproteobacteria	Rickettsiales	mitochondria
1933ac7e5faf6244d1cfacf7e2f962b0	Bacteria	OP3	BD4-9
90722a58387204d92de2be9d7daab6a2	Bacteria	Proteobacteria	Betaproteobacteria	Burkholderiales	Comamonadaceae	Hydrogenophaga
0512cccd93ceea4af339c6e6456465d2	Bacteria	Proteobacteria	Betaproteobacteria
bcabff9be0f297148813fb9dcd0c93ef	Bacteria	Proteobacteria	Betaproteobacteria
55b238b944275a16d41e7399b13dfa15	Bacteria	Cyanobacteria	Chloroplast	Stramenopiles
ec9562edcf3986f9a56ee377d8ff737c	Bacteria	Cyanobacteria	Chloroplast	Streptophyta
f936ac6dc5b21068d7aea3a97ff775e8	Bacteria	Proteobacteria	Gammaproteobacteria	Alteromonadales	OM60
cc3cdd2ff9769ffe23e1c9cb097e0af8	Bacteria	Proteobacteria	Betaproteobacteria	Burkholderiales	Oxalobacteraceae	Herbaspirillum
74b662c142668b23b8fae60b716af76c	Bacteria	Bacteroidetes	Flavobacteriia	Flavobacteriales	Flavobacteriaceae
900afa963e27408f431a968c0a29c4ba	Bacteria	Proteobacteria	Gammaproteobacteria	Thiotrichales	Piscirickettsiaceae
7e6dee0ebad6cb9bcdf484114033a30d	Bacteria	Bacteroidetes	Flavobacteriia	Flavobacteriales	Flavobacteriaceae	Flavobacterium	gelidilacus
710b9870d9a9c16e9a8eb010ad4a7cbd	Bacteria	Actinobacteria	Thermoleophilia	Solirubrobacterales	Conexibacteraceae
d4c8ec9d7d027a51faafcc9acd9edb69	Bacteria	Proteobacteria	Alphaproteobacteria
c9b6f06a64809b4085cf1c5c680fc62b	Bacteria	Proteobacteria	Betaproteobacteria	Burkholderiales	Comamonadaceae	Rhodoferax
f6edbcb91f18c1dcc550ce2c68333165	Bacteria	Actinobacteria	Actinobacteria	Actinomycetales	Geodermatophilaceae	Blastococcus	aggregatus
bb426a91f236f89ee90b5b07a464e120	Bacteria	Actinobacteria	Acidimicrobiia	Acidimicrobiales
bcba47620c299fd34809f143e3d26dff	Bacteria	Proteobacteria	Alphaproteobacteria	Sphingomonadales	Sphingomonadaceae	Sphingomonas
d376f78439bd2ec56f8e1f2f71147c13	Bacteria	Proteobacteria	Gammaproteobacteria
577707b744c7ba478e046823f93146d5	Bacteria	Proteobacteria	Betaproteobacteria
23c1c4d01ab4fb1dddd34b83a4416376	Bacteria	Proteobacteria	Deltaproteobacteria
700b589b56bfcb6392274cb26dd2166b	Bacteria	Proteobacteria	Alphaproteobacteria	Rhizobiales
33d7317d54fe41bced73dd2f497c12ec	Bacteria	Cyanobacteria	Oscillatoriophycideae	Chroococcales	Gomphosphaeriaceae	Snowella
3ad1c8aad6bdd6f9f60902f08beaf0b1	Bacteria	Actinobacteria	Acidimicrobiia	Acidimicrobiales	JdFBGBact
1d1d68c0261030f6885f385754f10174	Bacteria	Bacteroidetes	Flavobacteriia	Flavobacteriales	Flavobacteriaceae	Flavobacterium
9a637c01babe1d28facfb62c374874bc	Bacteria	Proteobacteria	Alphaproteobacteria	Rickettsiales	mitochondria
4c3c91a07e2685ea9eef6c712380549c	Bacteria	Proteobacteria	Betaproteobacteria	Burkholderiales	Oxalobacteraceae	Polynucleobacter
702af9e944edfd5a1a7f0dce0d566376	Bacteria	Actinobacteria	Actinobacteria	Actinomycetales	Microbacteriaceae	Salinibacterium
52c6965b0eda3f37cf7a46a78356edbe	Bacteria	Proteobacteria	Alphaproteobacteria	Rickettsiales	mitochondria
f48c022844a775795128c58013301654	Bacteria	Actinobacteria	Actinobacteria
d91d91ddd239d382e64507aae73eba4b	Bacteria	Proteobacteria	Betaproteobacteria	Rhodocyclales	Rhodocyclaceae	Dechloromonas
e72f92e8de7165d23a81dbec02f9d423	Bacteria	Proteobacteria	Alphaproteobacteria	Rickettsiales	mitochondria
39f58ec1f86a4ae433c06e4340c8fac5	Bacteria	Acidobacteria	Acidobacteria-6	iii1-15	RB40
dcc197c66e2fdaa809c1e04f7a79a2fe	Bacteria	Cyanobacteria	Synechococcophycideae	Synechococcales	Synechococcaceae	Synechococcus
a0b35aedeea2cace833506fabd52cf22	Bacteria	Proteobacteria	Alphaproteobacteria	Rickettsiales	mitochondria
610eb56165a4d8090511c5088511b048	Bacteria	Proteobacteria	Gammaproteobacteria	Alteromonadales	HTCC2188	HTCC
f8a49510b4163d28e29b74db43c539e6	Bacteria	Actinobacteria	Thermoleophilia	Gaiellales
09ae24f2154f672b30052e73e7e8d7c1	Bacteria	Cyanobacteria	Synechococcophycideae	Synechococcales	Synechococcaceae	Synechococcus
6c5f4144f390fce344fcab88a797638a	Bacteria	Proteobacteria	Alphaproteobacteria	Rhizobiales	Hyphomicrobiaceae
7c7460390452e22396912b94d42642e8	Bacteria	Proteobacteria	Gammaproteobacteria	Oceanospirillales	Oceanospirillaceae	Oleibacter
62b0b243d6b3b2b15948054bc600ff86	Bacteria	Chloroflexi	Chloroflexi	[Roseiflexales]
46ca097e633fe69ec90772cf148a72eb	Bacteria	Actinobacteria	Actinobacteria	Actinomycetales
10bb7eb297db0e9a203c4323762c87ed	Bacteria	Gemmatimonadetes	Gemm-1
1543a48392363e033ba5b2e1e9ac1e93	Bacteria	Proteobacteria	Gammaproteobacteria
443172e38bca6c516500f7f810a4ef50	Bacteria	Chloroflexi	SL56
765f91d156a1d9a9a8180bc02aafbf7f	Bacteria	Cyanobacteria	Chloroplast	Haptophyceae
58a9a501230a08491f94325868b26299	Bacteria	Proteobacteria	Gammaproteobacteria	Pseudomonadales	Pseudomonadaceae	Pseudomonas	stutzeri
92f1720367db58c68a96eceb9feb416a	Bacteria	Proteobacteria	Alphaproteobacteria	Rhizobiales	Methylobacteriaceae
436736dde2bcafb6b17fa5381329e9ca	Bacteria	Proteobacteria	Gammaproteobacteria	Xanthomonadales	Sinobacteraceae
9f269a0987e15d2b6f41bbec7f233e88	Bacteria	Proteobacteria	Gammaproteobacteria	HTCC2188	HTCC2089
6610735ba168bdf1d466050e4e227c0d	Bacteria	Bacteroidetes	Sphingobacteriia	Sphingobacteriales	Sphingobacteriaceae
37cad84cf57dea2dbad0da5d9fcad2fb	Bacteria	Proteobacteria	Alphaproteobacteria	Rickettsiales	mitochondria
f909a207ac57c17e832480a9b164c19b	Bacteria	Proteobacteria	Alphaproteobacteria	Rickettsiales	mitochondria
8f0fb68673a8b3c26f3fd210e29b7916	Bacteria	Firmicutes	Clostridia	Clostridiales	Clostridiaceae	Clostridium	bowmanii
c98d9ae5d974e23928a936d21e604323	Bacteria	Proteobacteria	Alphaproteobacteria	Sphingomonadales
99d5712f7b5b20171e7046d1d1186331	Bacteria	Proteobacteria	Alphaproteobacteria	Sphingomonadales
916adc5619fafc4705b3e937d5b00c6f	Bacteria	Bacteroidetes	Flavobacteriia	Flavobacteriales	Flavobacteriaceae	Flavobacterium
2860312edd448a1de2b94e472b9f1b51	Bacteria	Proteobacteria	Alphaproteobacteria	Rickettsiales	mitochondria
c06350a9c4427385d5bf910c5dadfc3c	Bacteria	Proteobacteria	Gammaproteobacteria	Alteromonadales	OM60
2ffd05a34a92a4901d63abfe18c264d6	Bacteria	Bacteroidetes	Flavobacteriia	Flavobacteriales	Cryomorphaceae	Fluviicola
b16910a4e04ea09cd5bce372d115a10b	Bacteria	Actinobacteria	Actinobacteria	Actinomycetales	ACK-M1
95f82cfe7a438d00e5e7af0ebf52c9fe	Bacteria	Cyanobacteria	Chloroplast	Stramenopiles
b9751f16879fbd474ae7a3a059a9f474	Bacteria	Bacteroidetes	Flavobacteriia	Flavobacteriales	Flavobacteriaceae	Ulvibacter
d653e4ddf98c6834bdd4324c24e5fb8f	Bacteria	Proteobacteria	Alphaproteobacteria	Rhodobacterales	Rhodobacteraceae
c088396d71712aba811fd51c7b83534b	Bacteria	Proteobacteria	Gammaproteobacteria	Legionellales
5d8f19bbabf4227a7d99ebc882d993f0	Bacteria	Proteobacteria	Alphaproteobacteria	Rickettsiales	mitochondria	Thalassiosira	pseudonana
d25731d4d609a3643ee40045287257f8	Bacteria	Proteobacteria	Gammaproteobacteria	Alteromonadales	Alteromonadaceae	Glaciecola
cd4fc6287749bbabcb079d540d89dc87	Bacteria	Proteobacteria	Gammaproteobacteria	Alteromonadales	HTCC2188	HTCC
80ca1090765a8e58b2a5180c58baa604	Bacteria	Bacteroidetes	Bacteroidia	Bacteroidales	SB-1
ed1455c9a364b63d9be173cf9a3817b0	Bacteria	Bacteroidetes	Flavobacteriia	Flavobacteriales	Flavobacteriaceae	Lutimonas
f4c57297ecefe75f7cae850c489ca750	Bacteria	Bacteroidetes	[Saprospirae]	[Saprospirales]	Chitinophagaceae
9e72af45764ecb6f17a458c5e2fb0b6b	Bacteria	Proteobacteria	Alphaproteobacteria	Rickettsiales	mitochondria	Ochromonas	danica
7a15ac03906245390100dcecd53238bf	Bacteria	Proteobacteria	Alphaproteobacteria	Rickettsiales
c0acc4ddeccf14732fdc726efab91028	Bacteria	Cyanobacteria	Chloroplast	Stramenopiles
c2181f02977d58628c40382be3eeabba	Bacteria	Cyanobacteria	Chloroplast	Haptophyceae
3869dc7384c37c3be20dcd2a9096f9d7	Bacteria	Bacteroidetes	Sphingobacteriia	Sphingobacteriales
3c4ffc8f8aa1409f603d60c75c15f4da	Bacteria	Proteobacteria	Alphaproteobacteria	Rhodospirillales	Rhodospirillaceae
10dbbe438378754c4dc5e77443b7fac4	Bacteria	Proteobacteria	Gammaproteobacteria	Chromatiales
4b64dd88805bc3dca176c6e917c92d81	Bacteria	Bacteroidetes	Flavobacteriia	Flavobacteriales	Flavobacteriaceae	Polaribacter
f74ba015e3912fcbf88576b4087c3768	Bacteria	Proteobacteria	Alphaproteobacteria	Sphingomonadales	Erythrobacteraceae
a309894898a7793786d3b7c13333485b	Bacteria	Bacteroidetes	Cytophagia	Cytophagales	Cyclobacteriaceae
472fd29d55be6fe1316a92bb23d1857a	Bacteria	Cyanobacteria	Chloroplast	Haptophyceae
7f34fe80594ff46667b6f3875fddb600	Bacteria	Proteobacteria	Alphaproteobacteria	Rhizobiales	Hyphomicrobiaceae	Devosia
03a72d91e2413b179b28d3213d7a92e0	Bacteria	Proteobacteria	Alphaproteobacteria	Rickettsiales	Rickettsiaceae
2cb427e2b256a4cd6e31f81aea61504c	Bacteria	Chlamydiae	Chlamydiia	Chlamydiales	Rhabdochlamydiaceae	CandidatusRhabdochlamydia
a69958341403f7152aa170f480d0a7e9	Bacteria	Actinobacteria	Actinobacteria	Actinomycetales	ACK-M1
68262884f1021c896f8e1bf7348d773c	Bacteria	Bacteroidetes	Flavobacteriia	Flavobacteriales	Flavobacteriaceae	Flavobacterium	succinicans
1aa45332969575442e0a457ef371669d	Bacteria	Verrucomicrobia	Verrucomicrobiae	Verrucomicrobiales	Verrucomicrobiaceae	Luteolibacter
0f7c6e7aabc6a32e7f6b49b2fd6a93d7	Bacteria	Proteobacteria	Gammaproteobacteria	Thiotrichales	Thiotrichaceae
0dc98f662b7492a2061f24cdea722c26	Bacteria	Gemmatimonadetes	Gemmatimonadetes	KD8-87
b8bdd0dae8ff5da16ea443841b5d2c6a	Bacteria	Proteobacteria	Alphaproteobacteria	Rickettsiales
13b824ccea6f6378796b5fe2f9bd11cf	Bacteria	Cyanobacteria	Chloroplast	Chlorophyta	Chlamydomonadaceae
9c4a434082361719d0dc2c38a43d550a	Bacteria
fc01a1ca3c8df6b32c69a756ec138664	Bacteria	Bacteroidetes	Flavobacteriia	Flavobacteriales	Flavobacteriaceae	Polaribacter	irgensii
914645dec731f7174d373f9d82c80b02	Bacteria	Verrucomicrobia	Verrucomicrobiae	Verrucomicrobiales	Verrucomicrobiaceae
f7bd4b7d813733af14ea4b4f89f4a4b8	Bacteria	Proteobacteria	Gammaproteobacteria	Legionellales	Legionellaceae
8a2f090113b826e153aa126c6b55d3f6	Bacteria	Cyanobacteria	Chloroplast	Haptophyceae
3baeee42f677c920c9bf090ff4125055	Bacteria	Bacteroidetes	Cytophagia	Cytophagales	Cytophagaceae
7e614336ec9a71f8cc89152851e682c7	Bacteria	ZB3	BS119
27aeff481683020385ff79cf659baf92	Bacteria	Chlamydiae	Chlamydiia	Chlamydiales
50d762f02390b5833833f98f837fecd7	Bacteria	Proteobacteria	Alphaproteobacteria	Rickettsiales	mitochondria
583b482e1dd4729c78aa63d63f81cf0b	Bacteria	Verrucomicrobia	Verruco-5	WCHB1-41
f8a9a10d4f2b7c2b95db9e16403bfb22	Bacteria	Cyanobacteria	Chloroplast	Stramenopiles
e2a35867731fb073463f823bb3f063d2	Bacteria	Proteobacteria	Deltaproteobacteria	Desulfuromonadales	Geobacteraceae	Geobacter
51c416a37530c952ad1938a7c5ebd444	Bacteria	Proteobacteria
8e003aeb00a49a919dab9864ad556801	Bacteria	Verrucomicrobia	Opitutae	Opitutales	Opitutaceae	Opitutus
1cb1cab4e83db881e4cc221cb4a980f7	Bacteria	Actinobacteria	Acidimicrobiia	Acidimicrobiales	C111
bec33d0c3f5112b44bf3dfba1ef65ed8	Bacteria	Acidobacteria	Acidobacteria-6	iii1-15
7ac90ea3e5fdd45312965cbfd70cff27	Bacteria	Verrucomicrobia	Verrucomicrobiae	Verrucomicrobiales	Verrucomicrobiaceae	Luteolibacter
ad9e0017fee8f1eaaf3c142b2c9fa459	Bacteria	Proteobacteria	Alphaproteobacteria	Rhodobacterales	Hyphomonadaceae
f65d982c96404c2a79b6a0e675a6af5d	Bacteria	Verrucomicrobia	[Pedosphaerae]	[Pedosphaerales]
87f8a839205a6461ec19bec252bb48c1	Bacteria	Proteobacteria	Gammaproteobacteria	Thiotrichales	Piscirickettsiaceae
caf4c05eda5d71ded23f2c64959ee6b3	Bacteria	ZB3	BS119
8814cdd0ce4e7f01c1902dcc2347d9b7	Bacteria	Bacteroidetes	Sphingobacteriia	Sphingobacteriales
4e13a88e53218d14be546cb458cf87cf	Bacteria	Planctomycetes	Planctomycetia	Planctomycetales	Planctomycetaceae	Planctomyces
17e46263eeb06de48449fa8ffa6d9f47	Bacteria	Proteobacteria	Alphaproteobacteria	Rickettsiales	mitochondria
e8b0b0af1c23369fa523cfd66c26f510	Bacteria	Proteobacteria	Gammaproteobacteria	[Marinicellales]	[Marinicellaceae]
f3405d9cc91b3f721f4a4415cc1cf8a3	Bacteria	Proteobacteria	Gammaproteobacteria	Thiotrichales	Piscirickettsiaceae
623ce97df3f111e94b57649bb2b1991a	Bacteria	Verrucomicrobia	Opitutae	Opitutales	Opitutaceae
4287f9128329cdf3a30826b67cc0126c	Bacteria	Cyanobacteria	Chloroplast	Chlorophyta
d391582e27329b0ca8a006738a29c181	Bacteria	Cyanobacteria	Chloroplast	Stramenopiles
8538a382a5e13c35187932b61abc532d	Bacteria	Cyanobacteria	Chloroplast	Stramenopiles
9cd4e1e55a4fdbae9eb8e3d2db6d0212	Bacteria	Bacteroidetes	[Saprospirae]	[Saprospirales]	Chitinophagaceae	Sediminibacterium
c1ba9460c7bf03aa48206243533697a9	Bacteria	Proteobacteria	Betaproteobacteria
8bb2644d07ddab844c3ce80e74d8bba2	Bacteria	Verrucomicrobia	[Pedosphaerae]	[Pedosphaerales]
0b99f7d067cddf06d2039288eda2a691	Bacteria	Proteobacteria	Gammaproteobacteria	Pseudomonadales	Moraxellaceae	Psychrobacter
8ee10737806b5bd2a3fcafa88f711d69	Bacteria	Bacteroidetes	Flavobacteriia	Flavobacteriales	Flavobacteriaceae	Flavobacterium
dfd94e04bf9a45dfc4562795263e3a03	Bacteria	Cyanobacteria	Chloroplast	Stramenopiles
59157b8db2b0c3722a41ed9cf693e3f2	Bacteria	Bacteroidetes	Sphingobacteriia	Sphingobacteriales
ef2c7c1430fae635534a935a2087f313	Bacteria	Proteobacteria	Gammaproteobacteria
24123f1ed7bffb358f47b0eacfb43e98	Bacteria	Cyanobacteria	Chloroplast	Cryptophyta
750ba0e2bb9fe55d1cbb3b4eaadc1981	Bacteria	Bacteroidetes	[Saprospirae]	[Saprospirales]	Chitinophagaceae
5938bbfab01cc4b328e1c4e65706275f	Bacteria	Cyanobacteria	Chloroplast	Stramenopiles
aa8553ebd7e5dcc37bd9437e0cbe425e	Bacteria	Proteobacteria	Gammaproteobacteria
bf62cd58a0a3329c5022a80d3a4c2f6e	Bacteria	Proteobacteria	Gammaproteobacteria	[Marinicellales]	[Marinicellaceae]
636a046a3ed2530d0422ad32c1560a66	Bacteria	Proteobacteria	Deltaproteobacteria	Bdellovibrionales	Bacteriovoracaceae
e0275fca226f94283c0ec3cf6a287821	Bacteria	Verrucomicrobia	Opitutae	[Cerasicoccales]	[Cerasicoccaceae]
7595d99589b8d35449028f5e44a1a435	Unassigned
91cbf4ce8dd6a6f20cebc29b3909cfca	Bacteria	Proteobacteria	Gammaproteobacteria	Alteromonadales	HTCC2188
25cf61fa563b397ce79c93fa98e7f5a7	Bacteria	Proteobacteria	Alphaproteobacteria	Rhodobacterales	Rhodobacteraceae
f120ef7fdc1d1bc82a59ee02f4fa3683	Bacteria	Verrucomicrobia	[Spartobacteria]	[Chthoniobacterales]	[Chthoniobacteraceae]
090a5b13b50ccc3fa1caef9c6daa17f0	Bacteria	Proteobacteria	Alphaproteobacteria	Rhodobacterales	Rhodobacteraceae
6b4e78e334dcca7ef87fe0d91b937ad6	Bacteria	Planctomycetes	Planctomycetia	Pirellulales	Pirellulaceae
d7728d32ed060398d36f0ea1cfbb8c01	Bacteria	Proteobacteria	Gammaproteobacteria	Legionellales	Coxiellaceae	Rickettsiella
990098b8f9616094236616556889b3ef	Bacteria	Bacteroidetes	Sphingobacteriia	Sphingobacteriales
4a4da2ad9a52d30c32a1e699059d4d8b	Bacteria	Bacteroidetes	Flavobacteriia	Flavobacteriales	Cryomorphaceae	Fluviicola
ad111e8ef39632eb13661b941216973f	Bacteria	Cyanobacteria	Chloroplast	Chlorophyta
f06226a7bc73b72e49227c5f8b849a8f	Bacteria	Bacteroidetes	Cytophagia	Cytophagales	Cytophagaceae	Cytophaga
4302e172532d4c691b53ee5030ebc127	Bacteria	Proteobacteria	Alphaproteobacteria	Ellin329
1c86ea22f386214cb7c2c2e9e1dd7853	Bacteria	Proteobacteria	Alphaproteobacteria
8d88c0f9f177f9ac76e2b8ce1d0f8522	Bacteria	OD1	ABY1
1f2c1f1c3ddc37ef715e9b448776512b	Bacteria	Bacteroidetes	[Saprospirae]	[Saprospirales]	Chitinophagaceae
7d7d2f296602df85f1660a9686cd6b21	Bacteria	Cyanobacteria	Chloroplast	Stramenopiles
c9f782ab75366261c9c34ea1ec47e1fa	Bacteria	Actinobacteria	Actinobacteria	Actinomycetales	ACK-M1
24b578131702a8fd35483b16aeeb93ee	Bacteria	Proteobacteria	Betaproteobacteria
595346ce49bf911a55723019ae769524	Bacteria	Chloroflexi	Chloroflexi	[Roseiflexales]
b55792eb365a7f77b7860e7b59b70afc	Bacteria	Cyanobacteria	Chloroplast	Stramenopiles
1bc9a1226c3698268be0531dd005d53f	Bacteria	Bacteroidetes	Sphingobacteriia	Sphingobacteriales
5374b2f2cfd2fb1415a1acdb0df716e9	Bacteria	Proteobacteria	Gammaproteobacteria	Legionellales
16c1e90853ad4b0f2412b26d501b3eb4	Bacteria	Cyanobacteria	Chloroplast	Stramenopiles
1fa42aed58e13121d915ab9f79994959	Bacteria	Bacteroidetes	Flavobacteriia	Flavobacteriales	Cryomorphaceae
bfed5f5c453332ce1a4eba7cf3049085	Bacteria	Proteobacteria	Gammaproteobacteria	Alteromonadales	HTCC2188
3516215d5db7f6781fe7331aca011932	Bacteria	Proteobacteria	Gammaproteobacteria	Legionellales	Legionellaceae
cf93a75ae5605559e801df2c3842fb4c	Bacteria	Proteobacteria	Alphaproteobacteria	Sphingomonadales	Sphingomonadaceae	Novosphingobium
006c1f136efc799fe8ddb0b6c5b55e4c	Bacteria	Proteobacteria	Betaproteobacteria	Burkholderiales	Comamonadaceae	Methylibium
aa035c51043b15490d4558b062a612ae	Bacteria	Cyanobacteria	Chloroplast	Stramenopiles
8b1d2ad098c62ae450bd5a9c1c65c980	Bacteria	Actinobacteria	Actinobacteria	Actinomycetales	Microbacteriaceae	Planktoluna	difficilis
3db571818ce0d32118656f000751d30b	Bacteria	Proteobacteria	Betaproteobacteria
2fb3ffb4d2b7ed016967964084eaabbd	Bacteria	Bacteroidetes	Flavobacteriia	Flavobacteriales	Cryomorphaceae
b70f42becdc3f02cc2a7b6284f8f19f1	Bacteria	Proteobacteria	Betaproteobacteria	Nitrosomonadales	Nitrosomonadaceae
625b3bc5da0d5b8a1ffda32e4501d0f1	Bacteria	Actinobacteria	Thermoleophilia	Gaiellales	Gaiellaceae
df971cbf68b9d91301f557af45c65454	Bacteria
e86f39c772caa19380d9ce16b33b7a64	Bacteria	Proteobacteria	Gammaproteobacteria	Xanthomonadales	Sinobacteraceae
b121b6d5ff42412694bab612042ac625	Bacteria	Proteobacteria	Alphaproteobacteria	Rhodospirillales	Rhodospirillaceae
c0e7fa5b3a0887f1e2264f73ce391c54	Bacteria	Proteobacteria	Alphaproteobacteria	Rhodospirillales	Rhodospirillaceae
34333aca18b9467c8d1c7abcb708c05b	Bacteria	Actinobacteria	Actinobacteria	Actinomycetales	ACK-M1
e725e4439238bbf832df8a31cd9870a4	Bacteria	Proteobacteria	Gammaproteobacteria	Alteromonadales	Shewanellaceae	Shewanella
2c7168ee385176ea4961facb24c63cad	Bacteria	Proteobacteria	Alphaproteobacteria	Rickettsiales	mitochondria	Thalassiosira	pseudonana
689f1824bb6bdee2c08f619da1b57eb4	Bacteria	Proteobacteria	Betaproteobacteria	Burkholderiales	Comamonadaceae
fd91568b2f67f861ab0edbf488dea33b	Bacteria	Actinobacteria	Acidimicrobiia	Acidimicrobiales
04ceb23cccbf83aad0fcbad8e7953c44	Bacteria	Proteobacteria	Betaproteobacteria	Burkholderiales	Comamonadaceae
cf17888122edc2ddd5c73d972891b6e1	Bacteria	Proteobacteria	Alphaproteobacteria	Sphingomonadales
fb23b0ce92bbf8096506560aad696a3c	Bacteria	Proteobacteria	Alphaproteobacteria	Rhizobiales
0d7d6a39ec308ab07b864a61e273452c	Bacteria	Proteobacteria	Deltaproteobacteria	Desulfobacterales	Desulfobulbaceae
74eeb63b7220039b93ea020557d9ee92	Bacteria	Bacteroidetes	[Saprospirae]	[Saprospirales]	Saprospiraceae
9734944beb738cd07638c6c9e62255b4	Bacteria	Lentisphaerae	[Lentisphaeria]	Lentisphaerales	Arctic95B-10
62288a087372bef2549351f389a51027	Bacteria	Proteobacteria	Alphaproteobacteria	Rickettsiales
c41e38ec0abb37da79acd32fd3cd7c66	Bacteria	Actinobacteria	Actinobacteria	Actinomycetales	Corynebacteriaceae	Corynebacterium
64a95df2a5e7f1cd700732866d19c3c2	Bacteria	Actinobacteria	Actinobacteria	Actinomycetales	Microbacteriaceae
9c5ca166ae7b5f9833e77b37e0fb0e18	Bacteria	Proteobacteria	Gammaproteobacteria	Alteromonadales	Alteromonadaceae
ea7d67034760b4ade779d066575504cb	Bacteria	Proteobacteria	Betaproteobacteria	MND1
8ea2c4b6024295f229dd2fb57ca261f0	Bacteria	Proteobacteria	Gammaproteobacteria	[Marinicellales]	[Marinicellaceae]
f3aa019bd3c92a5235ac673dce00034f	Bacteria	Proteobacteria	Gammaproteobacteria	HTCC2188	HTCC2089
fe38288024b02ff1b28b366c422f0173	Bacteria	Actinobacteria	Actinobacteria	Actinomycetales	ACK-M1
15a6de3981b9c6bed0697e1fb199bc2d	Bacteria	Proteobacteria	Betaproteobacteria	Ellin6067
31b23df96901a1bd5e1959c8ef4e0331	Bacteria	Proteobacteria	Deltaproteobacteria	Bdellovibrionales	Bacteriovoracaceae
2e85d49e255445ed048781f6292ef0b1	Bacteria	Proteobacteria	Gammaproteobacteria	[Marinicellales]	[Marinicellaceae]
8871df4e3272c627a1037c3bc13f234e	Bacteria	ZB3	BS119
c11468d35e3e0a4334dd07a92ead7eef	Bacteria	Cyanobacteria	Chloroplast	Haptophyceae
4b005828a1cb2add3f80a8d6f4d87519	Bacteria	Proteobacteria	Alphaproteobacteria	Sphingomonadales	Sphingomonadaceae	Novosphingobium
d829bee4984f82ffc2453212157caf96	Bacteria	Proteobacteria	Alphaproteobacteria	Rhizobiales	Bradyrhizobiaceae	Bradyrhizobium
e41ccff6b086bac68198a11d750d1cc7	Bacteria	Proteobacteria	Gammaproteobacteria	Alteromonadales	OM60
00aad3e0f327002ff6e3cd07a95caede	Bacteria	Proteobacteria	Alphaproteobacteria	Rhodobacterales	Rhodobacteraceae	Loktanella	salsilacus
0993dca8b8679c4ba1957be6b7254855	Bacteria	Proteobacteria	Deltaproteobacteria	FAC87
1d1ba651814e1415fdf4eab3c393b955	Bacteria	Actinobacteria	Actinobacteria	Actinomycetales	Microbacteriaceae	CandidatusRhodoluna
9aa08531964cd71d315bf907a78bc077	Bacteria	Proteobacteria	Gammaproteobacteria	Vibrionales	Pseudoalteromonadaceae	Pseudoalteromonas
6965beb78aeacec8ded8f3beaf1b44c4	Bacteria	Proteobacteria	Gammaproteobacteria	Alteromonadales	HTCC2188
cff8dd8d04aab8e5745bcfb0777549b2	Bacteria	Cyanobacteria	Chloroplast	Chlorophyta
190b92e29501929df6620af8034174ae	Bacteria	Bacteroidetes	[Rhodothermi]	[Rhodothermales]	Rhodothermaceae
b134358da33eeb7ce81bf50b2f4a3cf5	Bacteria	Bacteroidetes	Flavobacteriia	Flavobacteriales	Cryomorphaceae
9a3af708aa2686e1d6115aeabbcf3cfd	Bacteria	Nitrospirae	Nitrospira	Nitrospirales	Nitrospiraceae	Nitrospira
e49cf46d5162fbaa331ff4a4b5c711b0	Bacteria	Bacteroidetes	Flavobacteriia	Flavobacteriales	Flavobacteriaceae	Flavobacterium	gelidilacus
b073dc8e93f2961a8cc339b71a3c6f5e	Bacteria	Actinobacteria	Acidimicrobiia	Acidimicrobiales
6989211ae71ecfc428e4cb387830427a	Bacteria	Cyanobacteria	Chloroplast	Stramenopiles
97eb5bfddf2cfed5231c1b5d16b1e2d9	Bacteria	Planctomycetes	Planctomycetia	Pirellulales	Pirellulaceae
a7f8bdf3e357243c716eaa07017279b6	Bacteria	Bacteroidetes	Flavobacteriia	Flavobacteriales	Flavobacteriaceae	Ulvibacter
649f95fa440c689e0bd75a73e4825255	Bacteria	Planctomycetes	Planctomycetia	Planctomycetales	Planctomycetaceae	Planctomyces
d2012f74e2d4f85905674cd0f891b836	Bacteria	Proteobacteria	Gammaproteobacteria	Thiotrichales	Piscirickettsiaceae
6472eb8b1e09f892aca2f23182962903	Bacteria	Proteobacteria	Alphaproteobacteria	Rhizobiales	Bradyrhizobiaceae
7879c1b3853f3cd41f0f667a8cba469b	Bacteria	Actinobacteria	Actinobacteria	Actinomycetales	Mycobacteriaceae	Mycobacterium
72d9c32c2a5bccaa34638eb74916e922	Bacteria	Bacteroidetes	[Saprospirae]	[Saprospirales]	Saprospiraceae
3c5055ec78b0d3a16f7c4b75f559af91	Bacteria	Cyanobacteria	Chloroplast	Cryptophyta
ede7c4645eae753ffcd58b813489e73a	Bacteria	Bacteroidetes	Cytophagia	Cytophagales	Cytophagaceae
dbd500ec9c52f7173d2f8b962c889f0a	Bacteria	Actinobacteria	Acidimicrobiia	Acidimicrobiales
8f8f29f28429498db407bfdeb68c604d	Bacteria	Proteobacteria	Gammaproteobacteria	Legionellales	Legionellaceae
85ed1afb50c77ae459fe37e6c0206ffd	Bacteria	Proteobacteria	Gammaproteobacteria	Alteromonadales	Alteromonadaceae	Cellvibrio
552b2e6b06aff5e457765df86c108618	Bacteria	Proteobacteria	Gammaproteobacteria	Xanthomonadales	Xanthomonadaceae	Dokdonella
4231c0e22d02619ed9ba049d6dc49d00	Bacteria	Verrucomicrobia	Verrucomicrobiae	Verrucomicrobiales	Verrucomicrobiaceae	MSBL3
e81f6d9916ef6ba0c290e586b2183b5f	Bacteria	Nitrospirae	Nitrospira	Nitrospirales	Nitrospiraceae
053c09f43a8ca677723e10f2650f95aa	Bacteria	Proteobacteria	Alphaproteobacteria	Rhizobiales	Hyphomicrobiaceae
f8729c883e31feabbf336505335f519e	Bacteria	Planctomycetes	Planctomycetia	Planctomycetales	Planctomycetaceae	Planctomyces
aa11b7fecbbca304e3b36cce12f5bb66	Bacteria	Proteobacteria	Alphaproteobacteria	Sphingomonadales	Sphingomonadaceae	Novosphingobium
6a4d85714aa5465e75d7a920edad7a6b	Bacteria	Cyanobacteria	Chloroplast	Stramenopiles
d582d8faad5d33fe149ed4e480d6a6e1	Bacteria	Proteobacteria
64afa46994adcbc4ae47a619b3b4b415	Bacteria	Proteobacteria	Betaproteobacteria
84e7ff9bf4762d8524c746622aa60588	Bacteria	OP3	PBS-25
6bd8bdc08257c42a63097ae67d5590ff	Bacteria	Verrucomicrobia	Verrucomicrobiae	Verrucomicrobiales	Verrucomicrobiaceae
02d4662f38331fab99afe76474f5ae03	Bacteria	Proteobacteria	Alphaproteobacteria	Rickettsiales	mitochondria
0e73d583415674d05fb8c2778fb9b695	Bacteria	Chlamydiae	Chlamydiia	Chlamydiales	Simkaniaceae
50be1cc8e0a17ff2c871418fce496b49	Bacteria	Verrucomicrobia	Opitutae	Opitutales	Opitutaceae	Opitutus
3b170b4aea212c1470598e0d3d103288	Bacteria	Proteobacteria	Gammaproteobacteria	Alteromonadales	Alteromonadaceae	Simiduia
99b9f21cc0088261df7df95d28c71103	Bacteria	Proteobacteria	Deltaproteobacteria	Spirobacillales
7945d4b6d82f1ea07fa1a98244886e20	Bacteria	Proteobacteria	Betaproteobacteria	Burkholderiales	Oxalobacteraceae	Collimonas
ef65bd286a589c2f5a4acd25a60d2fce	Bacteria	Verrucomicrobia	Opitutae	Opitutales	Opitutaceae	Opitutus
9879a750c4dcbe94271efc3a64a8dcc6	Bacteria	Proteobacteria	Alphaproteobacteria	Rhodospirillales	Rhodospirillaceae
4ffd0d96dcf37921a8bd6d571abf5e38	Bacteria	Proteobacteria	Betaproteobacteria	Burkholderiales	Comamonadaceae
b31d9578151d50a1e93307f56e99ce4e	Bacteria	Proteobacteria	Alphaproteobacteria	Rhizobiales	Hyphomicrobiaceae
637b9b3f4d1cbb1a10c07817619cdf69	Bacteria	Proteobacteria	Gammaproteobacteria	Pseudomonadales	Pseudomonadaceae	Pseudomonas	veronii
65d43491988bfe557da4d86a5ba25dae	Bacteria	Firmicutes	Bacilli	Bacillales	Staphylococcaceae	Staphylococcus
4846dc7aea1400b11dc3a785dd7daf81	Bacteria	Cyanobacteria	Chloroplast	Stramenopiles
4868f68cb08976c69be8ccd94b1df424	Bacteria	Verrucomicrobia	Verrucomicrobiae	Verrucomicrobiales	Verrucomicrobiaceae	Luteolibacter
33730981125ce69a8726bada07ee7ff6	Bacteria	Proteobacteria	Gammaproteobacteria	Xanthomonadales	Sinobacteraceae
3981fa79dd216434100dd249381e3184	Bacteria	Bacteroidetes	Cytophagia	Cytophagales	Flammeovirgaceae
55ce73379b753a6d229a4febc0b1362d	Bacteria	Bacteroidetes	Flavobacteriia	Flavobacteriales	Flavobacteriaceae	Polaribacter
f7affcd94c5fec154f974e1975a4cb40	Bacteria	Proteobacteria	Gammaproteobacteria	[Marinicellales]	[Marinicellaceae]
09b2aadbde89fc4e9d2a28a36aaebb4f	Bacteria	Proteobacteria	Alphaproteobacteria	Rhizobiales	Rhizobiaceae	Agrobacterium
d0ca72cd6be55912b0fc621baed17f75	Bacteria	Verrucomicrobia	[Pedosphaerae]
786d172a2bbeeb5a6537df06c9faf50b	Bacteria	ZB3	BS119
80269c215b4be147eb458ca84bf9f0bc	Bacteria	Proteobacteria	Alphaproteobacteria	Rickettsiales	mitochondria	Thalassiosira	pseudonana
b635eb16b78b32111d85dd15df7f8032	Bacteria	Proteobacteria	Alphaproteobacteria	Rickettsiales	mitochondria
19c13eb77b68344efcbe25163d903369	Bacteria	Verrucomicrobia	Opitutae	Opitutales	Opitutaceae	Opitutus
a56b787e7914d63791c10e9148d1c94c	Bacteria
f98522d5a3aaf8ad9b200dd2ae2477e3	Bacteria	Cyanobacteria	Chloroplast	Stramenopiles
5fa97937c087ce34a2c5ae09d617b9b1	Bacteria	Verrucomicrobia	[Pedosphaerae]	[Pedosphaerales]	auto67_4W
a2c2464a1dbdf270b83a9b89ec2fe815	Bacteria	Bacteroidetes	Flavobacteriia	Flavobacteriales
62ddf4d21584dddcc879dd895ea298d8	Bacteria	Proteobacteria	Gammaproteobacteria	Legionellales	Legionellaceae
e4bcadbc826ad58a7e63d518951a3e59	Bacteria	Bacteroidetes	Flavobacteriia	Flavobacteriales	Cryomorphaceae	Fluviicola
2dd9e191a81b91117b77df5eac7e6048	Bacteria	Proteobacteria	Alphaproteobacteria	Caulobacterales	Caulobacteraceae	Caulobacter	henricii
5295f710a2863493c3fa6f5d104b7f85	Bacteria	Proteobacteria	Gammaproteobacteria	Chromatiales
11095f169166828864d52d5f274cbcbb	Bacteria	Proteobacteria	Alphaproteobacteria	Rhodobacterales	Rhodobacteraceae
982541ec56cee3f9152a8fb03c410da9	Bacteria	Proteobacteria	Alphaproteobacteria	Rhodobacterales	Rhodobacteraceae
cc52d51ef41eda377f6f26631bdaa7b7	Bacteria	Verrucomicrobia	Opitutae	Opitutales	Opitutaceae	Opitutus
2b83c5ea4f51b77705b1ff6883915afb	Bacteria	Proteobacteria	Alphaproteobacteria	Rickettsiales	mitochondria
79028721c6cf7ec53c17d90142a8a747	Bacteria	Cyanobacteria	Chloroplast	Stramenopiles
2a64f7117c72e249a9c2e5850fd6eb3e	Bacteria	Proteobacteria	Alphaproteobacteria	Sphingomonadales	Sphingomonadaceae	Novosphingobium
108a95c5ec00d86772b454933ff370bc	Bacteria	Gemmatimonadetes	Gemmatimonadetes	KD8-87
77c2088466297f8fb762e39b8d09ce3e	Bacteria	Proteobacteria	Alphaproteobacteria	Rickettsiales	mitochondria
8a78040f2f33e70a2a5cd4cc06229eb9	Bacteria	Cyanobacteria	Chloroplast	Cryptophyta
20c6d34f0c0b12c194816b0e8fcffdff	Bacteria	Proteobacteria	Betaproteobacteria	Burkholderiales	Comamonadaceae
559508f3a961b5def8e5b68fcca7ecee	Bacteria	Actinobacteria	Acidimicrobiia	Acidimicrobiales
7ba641233be0e78ce5ba33168a0f9668	Bacteria	Proteobacteria	Betaproteobacteria	Procabacteriales	Procabacteriaceae
23fdc247e14a3de5398cbc82805fe4ac	Bacteria	Bacteroidetes	Flavobacteriia	Flavobacteriales	Cryomorphaceae
fb2b00a8282741f54559c37f4ce69e20	Bacteria	Cyanobacteria	Synechococcophycideae	Synechococcales	Synechococcaceae	Synechococcus
9c5fa4a022eb0f17e550f5416e666d3c	Bacteria	Bacteroidetes	Cytophagia	Cytophagales	Cytophagaceae	Leadbetterella
cec2a11582d79e69ecc3b65afb8b6e50	Bacteria	Chloroflexi	SAR202
d81f75adde4397bf405a869d81c3fbb6	Bacteria	Bacteroidetes	[Saprospirae]	[Saprospirales]
29e5a85ee31a01a998202d086218e6ed	Bacteria	Proteobacteria	Alphaproteobacteria
a0f0d092f79107b53ba295b8f1aefb52	Bacteria	Cyanobacteria	Chloroplast	Stramenopiles
ce4a7e530cf68cdaa2431fbf14d8adbc	Bacteria	Proteobacteria	Betaproteobacteria	Rhodocyclales	Rhodocyclaceae	CandidatusAccumulibacter
d1f379daa0fd84cf84042b4da847008b	Bacteria	Bacteroidetes	Cytophagia	Cytophagales	Cytophagaceae
f861deb66544ba4ec7c03c678f5b06fb	Bacteria	Bacteroidetes	Cytophagia	Cytophagales	Flammeovirgaceae	Roseivirga
bd7e0ad74eda8fa1477cf524f4f19e6f	Bacteria	Actinobacteria	Acidimicrobiia	Acidimicrobiales	C111
0827399539fe2cb37fe3878086cef65a	Bacteria	Proteobacteria
88f380177c2361f60b7fe930911fec0c	Bacteria	Firmicutes	Bacilli	Lactobacillales	Carnobacteriaceae	Carnobacterium	viridans
c52c131acca367ff613a76978e39fd22	Bacteria	Cyanobacteria	Chloroplast	Chlorophyta
10fff1882a677502c11af136cb1ad609	Bacteria	Bacteroidetes	[Saprospirae]	[Saprospirales]	Saprospiraceae
25b2721dfbb2bce10d8b1c14bc512884	Bacteria	Actinobacteria	Actinobacteria	Actinomycetales	Microbacteriaceae
9553e620cb553c2a8a1a9c205490c743	Bacteria	Proteobacteria	Gammaproteobacteria	Legionellales	Legionellaceae
a5e4fa1c4fdfceff6877d2ba21ae0b91	Bacteria	Proteobacteria	Alphaproteobacteria	Rhodobacterales	Hyphomonadaceae
dbf891b81810bae2731119f803bdd6e6	Bacteria	Proteobacteria	Alphaproteobacteria	Sphingomonadales	Sphingomonadaceae	Zymomonas
9fd652cebcda9bd75af20843c91b5d52	Bacteria	Proteobacteria	Alphaproteobacteria	Rhizobiales
5759360a141bae2e78568f3006c6abad	Bacteria	Proteobacteria	Gammaproteobacteria	Pseudomonadales	Pseudomonadaceae
08220c63935e60ddef0830ac0cd3a6c5	Bacteria	Actinobacteria	Actinobacteria	Actinomycetales	Microbacteriaceae	CandidatusRhodoluna
4d427f9afe095022fd2d296be179f5c7	Bacteria	Bacteroidetes	Flavobacteriia	Flavobacteriales	Flavobacteriaceae	Flavobacterium
fc7a29d11f1179418bf5cd389879d110	Bacteria	Proteobacteria	Gammaproteobacteria	Enterobacteriales	Enterobacteriaceae
c335fa0220ac67d9e083b76aca958520	Bacteria	Proteobacteria	Alphaproteobacteria	Rhizobiales	Hyphomicrobiaceae
ac07a06fa63c43641e5e465952112451	Bacteria	Proteobacteria	Gammaproteobacteria	Alteromonadales	HTCC2188
aef36f70050779b27ca467243cc77114	Bacteria	Proteobacteria	Alphaproteobacteria	Rickettsiales	mitochondria
c5f20d762874a3296511198ca816696c	Bacteria	Cyanobacteria	Chloroplast	Stramenopiles
2af4a274f019e35b4c876f0398d4dcb7	Bacteria	Spirochaetes	Spirochaetes	Spirochaetales	Spirochaetaceae	Spirochaeta	aurantia
769ddbdc5b3772876d91cd2c82c7d3bb	Bacteria	Proteobacteria	Gammaproteobacteria	Chromatiales	Chromatiaceae
5b4d690fee5d5fbaa8443fc4aaff3ea1	Bacteria	Proteobacteria	Alphaproteobacteria	Sphingomonadales	Sphingomonadaceae	Novosphingobium
bb0e961b6dc40424d16c2725ab7635ca	Bacteria	Verrucomicrobia	Opitutae
7f827a114048d384de0b2805c1ab9264	Bacteria	Bacteroidetes	Flavobacteriia	Flavobacteriales	Flavobacteriaceae
6fca66d1a7042080792760d4d7c79a26	Bacteria	Cyanobacteria	Chloroplast	Stramenopiles
b696cd0944d58f6ba6140df1f6757963	Bacteria	Bacteroidetes	Flavobacteriia	Flavobacteriales	Cryomorphaceae	Fluviicola
7995b91bc9c1f87f3b9be95df2ab97c8	Bacteria	Proteobacteria	Gammaproteobacteria	Chromatiales
1888187b67683578abff0e0c4fad3b7e	Bacteria	TM6	SJA-4
2a286f7414e19e0f90ff9e4d9b6f3fc3	Bacteria	Proteobacteria	Gammaproteobacteria	Legionellales	Legionellaceae
9b2cf06ccbe89ec8db84659fcc001a86	Bacteria	Proteobacteria	Alphaproteobacteria
893dd394ce91af7e54887aeb9cb5108a	Bacteria
37b7749fa4021721e8a2189fe19e5596	Bacteria	Chlamydiae	Chlamydiia	Chlamydiales	Rhabdochlamydiaceae	CandidatusRhabdochlamydia
d1c6bea96175d12f8e066e56c5ca3064	Bacteria	Proteobacteria	Alphaproteobacteria	Rickettsiales	mitochondria
b551f0ebf320ea166ba7ce6ecd4bda01	Bacteria	Proteobacteria	Gammaproteobacteria	Alteromonadales
6fc934428eefe754692f41331c494d72	Bacteria	Proteobacteria	Alphaproteobacteria	Caulobacterales	Caulobacteraceae
2dc7087fc87a98349d880c5cc9b29f49	Bacteria	Proteobacteria	Alphaproteobacteria	Caulobacterales	Caulobacteraceae	Phenylobacterium
e85ed9c50db41a8727fe2964ea000712	Bacteria	Cyanobacteria	Chloroplast	Stramenopiles
f1e34308d952529287ada31976faec95	Bacteria	Bacteroidetes	Cytophagia	Cytophagales	Cytophagaceae
35697c5610e56607ae29e209bf2e5129	Bacteria	Proteobacteria	Alphaproteobacteria	Rhodobacterales	Rhodobacteraceae	Rhodobacter
2f0074357586c801697a5914e6b555c4	Bacteria	Proteobacteria	Betaproteobacteria	Ellin6067
159670de120f961b11597b22ba56ea62	Bacteria	Gemmatimonadetes	Gemm-1
b65b36ce7d1fa4d7959e051e9355a2ae	Bacteria	Chlamydiae	Chlamydiia	Chlamydiales	Rhabdochlamydiaceae	CandidatusRhabdochlamydia
a33a0c7452e8a8f817c43d21b13d267b	Bacteria	Actinobacteria	Acidimicrobiia	Acidimicrobiales	C111
5931b5afa4f691e81f9fa835539139d9	Bacteria	Proteobacteria	Gammaproteobacteria	Legionellales	Coxiellaceae	Rickettsiella
8852a04cf2a531c9372cba004c41e555	Bacteria	Proteobacteria
2f21f6a0ea51b2b775d21a369d467053	Bacteria	Bacteroidetes	Flavobacteriia	Flavobacteriales	Flavobacteriaceae	Lutibacter
8b128e9b732005dae0783c6a3c918bf0	Bacteria	Proteobacteria	Gammaproteobacteria	Legionellales	Legionellaceae
91b4504f9c474a96de6161e06fcf73b3	Bacteria	Chlamydiae	Chlamydiia	Chlamydiales	Parachlamydiaceae
24cd8dccb781b543d7141b07affc0699	Bacteria	Cyanobacteria	Chloroplast	Cryptophyta
ad300be1f55331a5d564c0d34ff2ab76	Bacteria	Proteobacteria	Gammaproteobacteria
667d5039052fca0d851cf935aa80cad6	Bacteria	Proteobacteria	Alphaproteobacteria	Rickettsiales	mitochondria
b22ef8f2be2540217ff812e9ff613f35	Bacteria	Actinobacteria	Actinobacteria	Actinomycetales	ACK-M1
bf851acc0ba6630ae1f274e5cd0c5541	Bacteria	Proteobacteria	Alphaproteobacteria	Rickettsiales	mitochondria
265b710095b6ac9ebbf24684d221c17a	Bacteria	Proteobacteria	Epsilonproteobacteria	Campylobacterales	Helicobacteraceae	Sulfuricurvum	kujiense
a7fa7d36718ddc71098f55070b6d6067	Bacteria	Proteobacteria	Alphaproteobacteria	Caulobacterales	Caulobacteraceae
ea0230e129cc01c154dab9563521e212	Bacteria	Proteobacteria	Alphaproteobacteria	Rhodospirillales	Rhodospirillaceae
d8fbe4b861328b4086688c42a6207072	Bacteria	Proteobacteria	Gammaproteobacteria	[Marinicellales]	[Marinicellaceae]
7bb74f22aed5d0c2283c0a9fa1a44b0d	Bacteria	Proteobacteria	Alphaproteobacteria	Rickettsiales	mitochondria
ea19f83fa48512bd3045e26137451d8d	Bacteria	Actinobacteria	Thermoleophilia	Gaiellales	Gaiellaceae
649fa0af54a2a990ddc3198dc87d1ea1	Bacteria	Proteobacteria	Betaproteobacteria	Burkholderiales	Comamonadaceae
433b134cd7b6255bd9e47973260b21ec	Bacteria	Bacteroidetes	[Saprospirae]	[Saprospirales]
9299765c30bc3a5bd387ce64a24c27bc	Bacteria	Fibrobacteres	Fibrobacteria	258ds10
f5fbb52340d09b53fe82a94f3c3515db	Bacteria	Bacteroidetes	Flavobacteriia	Flavobacteriales	Flavobacteriaceae	Cellulophaga	pacifica
00d773da90524e1aafd3b82ecf6b2555	Bacteria	Bacteroidetes	[Saprospirae]	[Saprospirales]	Saprospiraceae
27627485c049ab1b0572f4a152a790e1	Bacteria	Bacteroidetes	[Saprospirae]	[Saprospirales]	Saprospiraceae
87160d7f67042c668822b6278a16ebe9	Bacteria	Bacteroidetes	Flavobacteriia	Flavobacteriales	Flavobacteriaceae	Flavobacterium
c8b5f9a1a90fab7daca0fe8a97e71620	Bacteria	Verrucomicrobia	Verrucomicrobiae	Verrucomicrobiales	Verrucomicrobiaceae	Verrucomicrobium
13955b6048effde4b1740237eda72a0e	Bacteria	Bacteroidetes	Cytophagia	Cytophagales	Cytophagaceae	Cytophaga
7ff346973a282aa55de296afdb5d74af	Bacteria	Actinobacteria	Actinobacteria	Actinomycetales	Micrococcaceae	Arthrobacter
a267e8acf8e274fe77241955126b4fc5	Bacteria	Cyanobacteria	Chloroplast	Stramenopiles
2282defd621dc77b5c9904f22fe1413d	Bacteria	Cyanobacteria	Chloroplast	Stramenopiles
36df4df234c13c0ce7b92f148738ed39	Bacteria	Proteobacteria	Gammaproteobacteria	Chromatiales	Ectothiorhodospiraceae
9ca551ec35cea91fc120900ca77e9328	Bacteria	Proteobacteria	Gammaproteobacteria	Methylococcales
9d28ce90e03ce937ace5d12b29f033b6	Bacteria	Proteobacteria	Alphaproteobacteria	Rhizobiales	Brucellaceae	Ochrobactrum	intermedium
3ddb57562ae7aaf6beb185c094eb6c6d	Bacteria	Bacteroidetes	[Saprospirae]	[Saprospirales]	Chitinophagaceae
f2268488a4bed66be028eb0d92771cc6	Bacteria
6abaf4fc69e5fbd76f35e006662629a4	Bacteria	Cyanobacteria	Chloroplast	Stramenopiles
b78dff61d01129b13dd92d444fab5925	Bacteria	Proteobacteria	Deltaproteobacteria	NB1-j	MND4
0be1f06a4fa1da9509f59d9b46ea33e2	Bacteria	Proteobacteria	Betaproteobacteria	Rhodocyclales	Rhodocyclaceae
2a3b4944530b261c4c344e5857f20981	Bacteria	Bacteroidetes	Flavobacteriia	Flavobacteriales	Cryomorphaceae	Fluviicola
aac00930695cc0561fceb2e44f1b6946	Bacteria	Proteobacteria	Alphaproteobacteria	Rickettsiales	mitochondria
4c2b68c973746046123a559cc605a200	Bacteria	Bacteroidetes	Flavobacteriia	Flavobacteriales	Cryomorphaceae	Fluviicola
4bcb7e0c62886dfe7257857923a77435	Bacteria	Actinobacteria	Thermoleophilia	Gaiellales
25f8adaa44337205896af5a208a9be14	Bacteria	Proteobacteria	Betaproteobacteria	Burkholderiales	Oxalobacteraceae	Polynucleobacter
5766515d4dda4a41a8a4438c26b89ba5	Bacteria	Bacteroidetes	[Saprospirae]	[Saprospirales]	Chitinophagaceae
9e5c3555df36add3450debac915c57a5	Bacteria	Proteobacteria	Alphaproteobacteria
8c7e73284af4da78355fb99eb86372f4	Bacteria	Proteobacteria	Alphaproteobacteria	Sphingomonadales	Erythrobacteraceae	Erythrobacter	seohaensis
f9fc5aea750b5f72ccbb386f46281c8b	Bacteria	Acidobacteria	Acidobacteria-6	iii1-15
cbacd87f1602d07851b107bf323308ea	Bacteria	Cyanobacteria	Chloroplast	Chlorophyta	Trebouxiophyceae
a738568b261166a672bdd2c51055fff7	Bacteria	Proteobacteria	Betaproteobacteria	Burkholderiales	Comamonadaceae	Rhodoferax
5bcd2e6effff2618091d415704254b11	Bacteria	Bacteroidetes	[Saprospirae]	[Saprospirales]	Saprospiraceae
4e6488dfc93f2eefe477c4511d0e8a49	Bacteria	Proteobacteria	Betaproteobacteria	Burkholderiales	Comamonadaceae	Hydrogenophaga
315fae925226ac44af01d992c1732f74	Bacteria	Planctomycetes	Planctomycetia	Gemmatales	Gemmataceae	Gemmata
ccb05b5f3a047857f64ca2788d1ca2d7	Bacteria	Cyanobacteria	Chloroplast	Stramenopiles
552be18dd6c16f1a24710b847285dfdc	Bacteria	Proteobacteria	Gammaproteobacteria	Oceanospirillales	Halomonadaceae	CandidatusPortiera
be66b909830257bfc1ea6adee4f7acbe	Bacteria	Chlamydiae	Chlamydiia	Chlamydiales	Parachlamydiaceae
e3e7eb7e41dd0e82763088988140aa00	Bacteria	Actinobacteria	Thermoleophilia	Solirubrobacterales	Patulibacteraceae
baceb1980124d75c32968224afef1058	Bacteria
dc01240247edcdc5aacfa26854aed42d	Bacteria	Cyanobacteria	Chloroplast	Stramenopiles
7a3120b453e96caf1a1e47ea48aa5f72	Bacteria	Actinobacteria	Actinobacteria	Actinomycetales
051adce2c6b7c31058bb38596901ab6b	Bacteria	Proteobacteria	Alphaproteobacteria
d63f5d03ff1389ed540917017e9f068d	Bacteria	Proteobacteria	Betaproteobacteria	Burkholderiales
4c5df690bcc9914e0758609cb79f0a81	Bacteria	Proteobacteria	Alphaproteobacteria	Rickettsiales	mitochondria
14d05bcb6de5774c6a83affe499761f1	Bacteria	Proteobacteria	Gammaproteobacteria	Xanthomonadales	Xanthomonadaceae	Thermomonas
73f95638ad5e78c543092b62f5631caa	Bacteria	Bacteroidetes	[Saprospirae]	[Saprospirales]	Saprospiraceae
5005d32c590d59d6009de223e4e195fb	Bacteria	Proteobacteria	Alphaproteobacteria
93387834ccf5fad68408c931a47a3e7e	Bacteria	Proteobacteria	Alphaproteobacteria	Rhizobiales	Rhizobiaceae	Shinella
08587b58a840186d4040620634a821f3	Bacteria	Planctomycetes	Planctomycetia	Pirellulales	Pirellulaceae
9af04068b06bb560573e49bc91309ead	Bacteria	Cyanobacteria	Chloroplast	Stramenopiles
9639c1757d91ce8ac64628fb1edd24c7	Bacteria	Proteobacteria	Gammaproteobacteria	Alteromonadales	Alteromonadaceae	Cellvibrio
b0b650670a4b79fc8d1a5355364f95bf	Bacteria	Bacteroidetes	Bacteroidia	Bacteroidales
f50b4f02eaf8bf49e7e2bf560820b581	Bacteria	Proteobacteria	Gammaproteobacteria	Chromatiales
74229ec139de24afeb51c122897715f6	Bacteria	Cyanobacteria	Chloroplast	Stramenopiles
2962c924b313a1159e98b69b3727ae31	Bacteria	Actinobacteria	Actinobacteria	Actinomycetales	Microbacteriaceae
1a314514be3c0bf8f80e9cbe7e4974fc	Bacteria	Cyanobacteria	4C0d-2	MLE1-12
653334c36340a20181971e05d9b4e110	Bacteria	Proteobacteria	Betaproteobacteria	Burkholderiales	Comamonadaceae	Rhodoferax
ed3f8d8f47258f6eba170105b4105acb	Bacteria	Proteobacteria	Alphaproteobacteria	Rhizobiales	Phyllobacteriaceae
0561595e58252832c3bbdeeb1864ad7c	Bacteria	Actinobacteria	Actinobacteria	Actinomycetales	ACK-M1
6a24da38d8970dc40fe54b8eed8a835a	Bacteria	Actinobacteria	Actinobacteria	Actinomycetales	Microbacteriaceae	CandidatusRhodoluna
6a7151f311b8871a509e0624837fb977	Bacteria	Cyanobacteria	Chloroplast	Stramenopiles
72143fd9e63fe40c1258948d2f0d79c3	Bacteria	Proteobacteria	Alphaproteobacteria	Rickettsiales	Pelagibacteraceae
457f3b3ec043520e1147d11ebf80e001	Bacteria	Proteobacteria	Betaproteobacteria
cf3c422c5a8c0c24b8116a736472ad65	Bacteria	Proteobacteria	Gammaproteobacteria	[Marinicellales]	[Marinicellaceae]
2e77e058e77815bc064ecf6d1726f675	Bacteria	TM6	SJA-4
7318cb1bb15003dad2122444e79f9060	Bacteria	Bacteroidetes	[Saprospirae]	[Saprospirales]	Saprospiraceae
d5357fb8e1093142e018837256394d41	Bacteria	Proteobacteria	Deltaproteobacteria	Desulfarculales	Desulfarculaceae
7415494f1acebf583211d53117eee1cc	Bacteria	Proteobacteria	Alphaproteobacteria	Rickettsiales	mitochondria	Thalassiosira	pseudonana
7de837e8e528b678cf9daf8e46bd7c33	Bacteria	Proteobacteria	Gammaproteobacteria
04181fa33f1ba893e1e6632e6ff778c5	Bacteria	Cyanobacteria	Chloroplast	Chlorophyta
8b59292c473cc561f020fdb02de7c9d1	Bacteria	Proteobacteria	Alphaproteobacteria	Rickettsiales	mitochondria
3c72e76ad31299df28daffdf30caf87a	Bacteria	Proteobacteria
538af1474c71b7eae335771f5477df32	Bacteria	Proteobacteria	Betaproteobacteria
8cb0b33e40d90f7d0e56f10e56f43c53	Bacteria	Chloroflexi	TK17
1a33df6b2a324704a246b754002fc774	Bacteria	Proteobacteria	Gammaproteobacteria	Thiotrichales	Piscirickettsiaceae
f5c1b0454aa31d567877d74dd786d3ba	Bacteria	Bacteroidetes	Sphingobacteriia	Sphingobacteriales
0bbdf40a72d2d0ef0213610f9fc17203	Bacteria	Proteobacteria	Gammaproteobacteria	Alteromonadales	OM60
20ecaf6550b196f2521224bee2139041	Bacteria	Bacteroidetes	Cytophagia	Cytophagales	Cyclobacteriaceae
2ce6c52a5ad1eda3c242d4d5538b8de0	Bacteria	Proteobacteria	Gammaproteobacteria	Xanthomonadales	Sinobacteraceae
0b58099b9e3078580ad1e7d19520c247	Bacteria	Proteobacteria	Betaproteobacteria	Burkholderiales	Oxalobacteraceae	Polynucleobacter	cosmopolitanus
5d324ba2a6460de903662ef6460eca18	Bacteria	Bacteroidetes	Cytophagia	Cytophagales	Flammeovirgaceae
cd595c4d4718f235de7afa8a4fb1d827	Bacteria	Cyanobacteria	Chloroplast	Stramenopiles
71980433dfb22eb6c2526855a7837f98	Bacteria	Bacteroidetes	Flavobacteriia	Flavobacteriales	Flavobacteriaceae	Ulvibacter
24e6649cb9c1714d481670d3c9bff7f6	Bacteria	Proteobacteria
9a2a437c19b15de632b0e3c7432cdc35	Bacteria	Proteobacteria	Alphaproteobacteria	Rhodobacterales	Rhodobacteraceae
fa96cbd7b2df953f48e159b78c51527d	Bacteria	Proteobacteria	Alphaproteobacteria	Caulobacterales	Caulobacteraceae	Mycoplana
56335ac95e507e0bbb08dc360850bfe5	Bacteria	Cyanobacteria	Chloroplast	Stramenopiles
31246acf119a49914ae2da8d60cf726c	Bacteria	Proteobacteria	Alphaproteobacteria	Rickettsiales
a269e67aadf451e3fc9b2bdcec1c47ce	Bacteria	Planctomycetes	Phycisphaerae	Phycisphaerales
c10b39469f5596ecbe5292fbaa5f5b88	Bacteria	Chloroflexi	SAR202
b99548c1eb038812aa57aa185ff2a7ab	Bacteria	Proteobacteria	Alphaproteobacteria	Rickettsiales
f45b0acae8bf4d11677e14884390e975	Bacteria
7b035b5315755ebcad98d3bfa3928f56	Bacteria	Proteobacteria	Alphaproteobacteria	Rickettsiales	mitochondria
881fb5ce578639cae59db7ce9acb6095	Bacteria	Cyanobacteria	Chloroplast
838f9b15d03dbd6dc65050aac63dd8d0	Bacteria	Proteobacteria	Alphaproteobacteria	Rhodobacterales	Hyphomonadaceae
8cd9b064a6cc9526fe836c8c4f6a7c05	Bacteria	Bacteroidetes	Sphingobacteriia	Sphingobacteriales
085cae7bbb63b0fa24f9e4cd9419255b	Bacteria	Actinobacteria	Actinobacteria	Actinomycetales
cc6bb642e1ae30ce746a9a72b0fd93f0	Bacteria	Proteobacteria	Gammaproteobacteria	Methylococcales	Crenotrichaceae	Crenothrix
e9eec47c118871031ea72780484a263f	Bacteria	Actinobacteria	Actinobacteria	Actinomycetales	Microbacteriaceae	Planktoluna	difficilis
d295e63bf67d549419055c6c0aa8f609	Bacteria	Cyanobacteria	Chloroplast	Stramenopiles
07577ac2f00edd30d4a945d21a834d49	Bacteria	Proteobacteria	Alphaproteobacteria	Rickettsiales
593954f80633edf4a8e1063d72153532	Bacteria	Proteobacteria	Betaproteobacteria	SC-I-84
c3b0a40b05cc2274646998eaf7a87ced	Bacteria	Bacteroidetes	Sphingobacteriia	Sphingobacteriales
a736bf8aab84f65b0a7e2cb20966b40f	Bacteria	Planctomycetes	OM190	CL500-15
8471dd8e0adf8dd9b11ce7621747787b	Bacteria	Proteobacteria	Gammaproteobacteria	Legionellales
4702f64292a29e3aa05ae165eced98e7	Bacteria	Proteobacteria	Gammaproteobacteria	Legionellales	Legionellaceae
ca4c47b3c0e9c70c308c63c2cafa8e70	Bacteria
0b0fdb5262a0f096a9447105cf77fe08	Bacteria	Proteobacteria	Alphaproteobacteria	Rhodobacterales	Rhodobacteraceae	Octadecabacter
d09764ebeef6e9fe64066c1a38994f4e	Bacteria	Proteobacteria	Alphaproteobacteria	Rhodospirillales	Rhodospirillaceae
745554da644bf2e85889a1708cb3cf0c	Bacteria	Proteobacteria	Gammaproteobacteria	Legionellales
768dc8d63f66ad4cf87ed3c3db0d0d9d	Bacteria	TM6	SJA-4
ca8743ed82235767ff72833de0d48a40	Bacteria	Actinobacteria	Actinobacteria	Actinomycetales	Microbacteriaceae	Clavibacter
b3ce7bc8e93672ace5f4afc92187f7d4	Bacteria	Cyanobacteria	Chloroplast	Chlorophyta
5ee51f6a330fe50e259fc2cb3ddc5832	Bacteria	Cyanobacteria	Chloroplast	Chlorophyta	Trebouxiophyceae
a42f6e855ccfccaea1b042a7618b3957	Bacteria	Bacteroidetes	Flavobacteriia	Flavobacteriales	Cryomorphaceae	Fluviicola
bac5fc2fd0e02503618acd2070f44c68	Bacteria	Proteobacteria	Gammaproteobacteria	[Marinicellales]	[Marinicellaceae]
bca82bc447bbd86d4a6a93e596e3aabd	Bacteria	Bacteroidetes	Flavobacteriia	Flavobacteriales	Cryomorphaceae
1a30e774916b909390ea4d931a009ba2	Bacteria	Bacteroidetes	[Saprospirae]	[Saprospirales]	Saprospiraceae
1de8c52f52773dd008485284722e4334	Bacteria	Actinobacteria	Acidimicrobiia	Acidimicrobiales	C111
e8a2bd558eaea71b831812118c6292c0	Bacteria	Proteobacteria	Alphaproteobacteria	Rickettsiales	Rickettsiaceae
7e19e120b2229b6e1b4a65cf2c8d929a	Bacteria	Proteobacteria	Gammaproteobacteria	Legionellales	Coxiellaceae	Aquicella
b160e34e023b3320ed3e7857cd9a278a	Bacteria	Proteobacteria	Alphaproteobacteria	Rickettsiales	mitochondria
5d39eb337383cf1bef10192bc4cbfe99	Bacteria	Proteobacteria	Alphaproteobacteria	Rhodobacterales	Rhodobacteraceae	Rhodobacter
ab663727e72b91937c7cd9771db9fae6	Bacteria	Actinobacteria	Actinobacteria	Actinomycetales	Microbacteriaceae	Clavibacter
79029fa983ec4eda60117a273a52cfc0	Bacteria	Proteobacteria	Alphaproteobacteria	Caulobacterales	Caulobacteraceae	Caulobacter	henricii
ebb55f5b7e1873926e89ecc64280ba00	Bacteria	Planctomycetes	Planctomycetia	Planctomycetales	Planctomycetaceae	Planctomyces
aa1cb1c1a567aea620272a9907ed1cc1	Bacteria	Bacteroidetes	Sphingobacteriia	Sphingobacteriales
8713bd14c097891b0c900a0e78dec5d2	Bacteria	Bacteroidetes	[Saprospirae]	[Saprospirales]	Chitinophagaceae
9e50c96026de909e7e115e3c1b150515	Bacteria	Cyanobacteria	Chloroplast	Chlorophyta
6e6f306a337ba255a7f4a7f8469ff691	Bacteria	Proteobacteria	Gammaproteobacteria	Alteromonadales	Alteromonadaceae	Cellvibrio
ac5ea54be12efa1b3206db6b2bf37a71	Bacteria	Gemmatimonadetes	Gemm-2
997e6a2a86e0c0af0bd6f50e2dea916f	Bacteria	Proteobacteria	Alphaproteobacteria
6c3fb343f46983254cdb83e99fa07a49	Bacteria	Proteobacteria	Alphaproteobacteria	Rhodobacterales	Rhodobacteraceae	Rhodobacter
834408b5dea275ad6ac778a97c1414cb	Bacteria	Proteobacteria	Alphaproteobacteria	Rhodobacterales	Hyphomonadaceae	Woodsholea	maritima
c4f7f7d843eca4862537b5052067f2bb	Bacteria	Proteobacteria	Alphaproteobacteria	Rhizobiales	Methylobacteriaceae	Methylobacterium
e615a60e6317b1b3c479a8a1e6642e4f	Bacteria	Proteobacteria	Gammaproteobacteria	Alteromonadales	OM60
f07e21e90e145b767a666b1e72d98baf	Bacteria	Planctomycetes	Planctomycetia	Planctomycetales	Planctomycetaceae	Planctomyces
b8cc687162c925fe9d5e4b6662539fdc	Bacteria	Proteobacteria	Alphaproteobacteria	Rickettsiales	mitochondria
b4904f0439808df27ecca12b392aafe1	Bacteria	Proteobacteria	Alphaproteobacteria	Rickettsiales
d992cc4ebb63a6c108e6f854519e2136	Bacteria	Proteobacteria	Alphaproteobacteria	Sphingomonadales
31b6359dcd019b1bf1162aa1dc33ea92	Bacteria	Bacteroidetes	[Saprospirae]	[Saprospirales]	Saprospiraceae
c4c2bbfdb13e34385138dc259abf9a1f	Bacteria	Cyanobacteria	Chloroplast
067037be8632291041fbc38dd3ff299f	Bacteria	OP3	BD4-9
160ce4cc2ef58aa108bf8e0a53b6f570	Bacteria	Bacteroidetes	Flavobacteriia	Flavobacteriales	Cryomorphaceae
9b8f0e9ad16bb718f2c439b54ead1fab	Bacteria	Proteobacteria	Alphaproteobacteria	Rhodospirillales	Acetobacteraceae	Roseomonas	frigidaquae
687900f8234b7263e43907dbb7cfdd88	Bacteria	Proteobacteria	Alphaproteobacteria	Rickettsiales
ed34818da58ad5cb07e025c0f73b04ab	Bacteria	Bacteroidetes	[Saprospirae]	[Saprospirales]	Saprospiraceae
cb7c3f786c3d69022d6b723160f4b239	Bacteria	Proteobacteria	Gammaproteobacteria	Thiotrichales	Piscirickettsiaceae
44f53549eb46b84f99167f9f0b2e8440	Bacteria	Proteobacteria	Alphaproteobacteria	Rickettsiales	mitochondria
7ab75068242191485a906ed169cd117c	Bacteria	Proteobacteria	Alphaproteobacteria	Rickettsiales	mitochondria
df3ad930204fb9ff1b4bef81bfb98d0f	Bacteria	Actinobacteria	Actinobacteria	Actinomycetales
316ab9a69727b4c5940cb547baacc25a	Bacteria	Gemmatimonadetes	Gemm-2
00c833ccf6bfa9076f0cbf89441c0f88	Bacteria	Proteobacteria	Gammaproteobacteria	Oceanospirillales	Oceanospirillaceae
6a5d78b96703c885c911817baa9be2f5	Bacteria	Bacteroidetes	[Saprospirae]	[Saprospirales]	Saprospiraceae
a2f776918cbb1365a99740554bd10142	Bacteria	Proteobacteria	Alphaproteobacteria	Rickettsiales	Rickettsiaceae
afdc4eeab8598f5bfecfff88328c0009	Bacteria	Bacteroidetes	Bacteroidia	Bacteroidales	SB-1
0c1a390eee30ee084721a7f220b3792a	Bacteria	Chlorobi	Ignavibacteria	Ignavibacteriales	Ignavibacteriaceae
fcc092d3c156f4855964e539266a0ccd	Bacteria	Chlamydiae	Chlamydiia	Chlamydiales
be999fe9d6788b32c7bb7a4267908f2d	Bacteria	Verrucomicrobia	Verrucomicrobiae	Verrucomicrobiales	Verrucomicrobiaceae	Rubritalea
bcd53bcc70b51bb73378601e6fdba3bc	Bacteria	Proteobacteria	Alphaproteobacteria	Rickettsiales	Rickettsiaceae	Rickettsia
67694546dbbdd9eb31e9772f1ce50fdf	Bacteria	Chloroflexi	Ellin6529
a5002d4f78f6246f733ccf1e79535bbc	Bacteria	Bacteroidetes	Sphingobacteriia	Sphingobacteriales
655724c09214381456a8d7d80dae06a5	Bacteria	Proteobacteria	Betaproteobacteria	Burkholderiales	Comamonadaceae
8d6ab43ca565b63dcd67eb08a0df9f8a	Bacteria	Proteobacteria	Gammaproteobacteria	Thiotrichales	Piscirickettsiaceae
cb005570d96fb64291458fdecbdceb53	Bacteria	Proteobacteria	Alphaproteobacteria	Rickettsiales	mitochondria
bf22db47913a3eef9827e30344eb634b	Bacteria	Proteobacteria	Deltaproteobacteria	Myxococcales	OM27
f79937d199dd2a193b6f0d763fab652e	Bacteria	Actinobacteria	Acidimicrobiia	Acidimicrobiales
ffaaeeedff2c0260533887d9b88a3393	Bacteria	Proteobacteria	Deltaproteobacteria	Syntrophobacterales	Syntrophaceae	Desulfobacca
e675a31f9c2c84dc0ded8ac54c3076be	Bacteria	Bacteroidetes	Bacteroidia	Bacteroidales
82103bdfc72fabd660964614818b6b3b	Bacteria	Cyanobacteria	Chloroplast	Cryptophyta
8d721866d49ab2f45678c63eb425b4b2	Bacteria	Proteobacteria	Alphaproteobacteria	Rhodospirillales	Rhodospirillaceae
b5203ea716509b2a7a9b8b9f70875eb6	Bacteria	Cyanobacteria	Chloroplast	Stramenopiles
5a37f59051d37c8d138f2dcd1b6a95dd	Bacteria	Bacteroidetes	[Saprospirae]	[Saprospirales]	Saprospiraceae
bdc6b2e04197cd0807b9642cb29259df	Bacteria	Proteobacteria	Alphaproteobacteria	Rhizobiales	Hyphomicrobiaceae	Rhodoplanes
095d8cb89ebb7ffa004ba2a7bc292d25	Bacteria	Planctomycetes	Planctomycetia	Planctomycetales	Planctomycetaceae	Planctomyces
e645157a8c79181c5ac478ffc3a3e975	Bacteria	Proteobacteria	Alphaproteobacteria	Ellin329
feceba4a638be31ee4b7e03b883a9305	Bacteria	Bacteroidetes	Flavobacteriia	Flavobacteriales
6bd477ff9220d2398e13bf66a5d284a5	Bacteria	Bacteroidetes
95684b8a95690b0242ad9dbdaed85565	Bacteria	Proteobacteria	Gammaproteobacteria	Legionellales	Legionellaceae
098fa90d9ac4bf30d6eeb7a19862197a	Bacteria	Bacteroidetes	Cytophagia	Cytophagales	Cytophagaceae
8bfbc7b6121f050e5781b87c6518bfac	Bacteria	Proteobacteria	Alphaproteobacteria	Rhodospirillales	Rhodospirillaceae
e1c0e69b9f2d7db1ca7d688fb58d7cbc	Bacteria	Proteobacteria	Epsilonproteobacteria	Campylobacterales	Helicobacteraceae
f91201adfe8be6ff17177daa8bb13518	Bacteria	Proteobacteria	Deltaproteobacteria	Syntrophobacterales	Syntrophobacteraceae
13b2f7f357ef51c659e6d54f75b69875	Bacteria	Cyanobacteria	Chloroplast
0e542bd2e9ce9817fb1d6fdcf877c98d	Bacteria	Cyanobacteria	Chloroplast	Stramenopiles
8f813280e8cc1c972cdf97b409fa6840	Bacteria	Verrucomicrobia	Verrucomicrobiae	Verrucomicrobiales	Verrucomicrobiaceae	Prosthecobacter
6f59f012689127a6ae40cdd12a948bcf	Bacteria	Bacteroidetes	[Saprospirae]	[Saprospirales]	Saprospiraceae
92c0c75c6858840cbc21744f047e2a02	Bacteria	Planctomycetes	Planctomycetia	Pirellulales	Pirellulaceae
e0c04f98628180fd510b9eafb997c987	Bacteria	Cyanobacteria	Chloroplast	Haptophyceae
e35724d90c6dbc5e1acae2e4d089dcf6	Bacteria	Proteobacteria	Gammaproteobacteria	HTCC2188	HTCC2089
011f6bf791d4b3e83d9f5fd56acc2bd7	Bacteria	AncK6
0629538213ca0e490c4845c4fd3bf1d1	Bacteria	TM6	SJA-4
d8ffd8801d7054d494cb69851ad23cf1	Bacteria	Proteobacteria	Alphaproteobacteria	Rhodospirillales	Rhodospirillaceae	Magnetospirillum
6a869f95f9b2a5c4a169a657dde9591d	Bacteria	Proteobacteria	Alphaproteobacteria	Rickettsiales
fffed806c039778551e927d8b0579f48	Bacteria	Proteobacteria	Alphaproteobacteria	Rickettsiales	mitochondria
af05c3908f356220a67a327d63372cae	Bacteria	Cyanobacteria	Chloroplast	Stramenopiles
29fe824f25e7d5e9feecea8e4ae57736	Bacteria	Chloroflexi	Ellin6529
b3ab9de04f409a89e694d048cf3e3c9d	Bacteria	Cyanobacteria	Chloroplast	Stramenopiles
7dd385c7897ede8476320623e5456d5e	Bacteria	Bacteroidetes	[Saprospirae]	[Saprospirales]	Saprospiraceae
6112d362565c5797eb555106a550d353	Bacteria	Proteobacteria	Gammaproteobacteria	Alteromonadales	Alteromonadaceae	Cellvibrio
bc744d60a4606acc8244944a85cd8606	Bacteria	Bacteroidetes	[Saprospirae]	[Saprospirales]	Saprospiraceae
2ac7bf01e36a275807caeeb5b9b998e3	Bacteria	Proteobacteria	Betaproteobacteria	Ellin6067
89c4c5564a288c9db2bba9c0fb8beae9	Bacteria	Proteobacteria	Alphaproteobacteria	Rickettsiales	Pelagibacteraceae
04bda614501535862dc075997aa31ccd	Bacteria	Cyanobacteria	Chloroplast	Stramenopiles
2bfdde275966e8b523b8c3c2ef874413	Bacteria	Proteobacteria	Alphaproteobacteria	Rickettsiales	mitochondria
681c1740d5917dc84caacdd55ece7ca2	Bacteria	Proteobacteria	Gammaproteobacteria	Pseudomonadales	Pseudomonadaceae
75df0a17441b55a6d24452d0cdd7e5e1	Bacteria	Bacteroidetes	[Saprospirae]	[Saprospirales]	Chitinophagaceae	Sediminibacterium
7b7595f9b76cf1c37a9b7943d54f75c2	Bacteria	Actinobacteria	Actinobacteria	Actinomycetales	Microbacteriaceae
d0727300556498cf399ed305d0558349	Bacteria	Proteobacteria	Alphaproteobacteria	Rickettsiales	mitochondria	Pythium	ultimum
d7467f78ef9e51cb5912a49635033df1	Bacteria	Planctomycetes	Planctomycetia	Planctomycetales	Planctomycetaceae	Planctomyces
b36023fc56449cdd4e744a34b01598f8	Bacteria	Proteobacteria	Alphaproteobacteria	Sphingomonadales	Erythrobacteraceae
4b5648c8630f90b170d9e716829ec119	Bacteria	Actinobacteria	Thermoleophilia	Solirubrobacterales
243dcd8a51535c43d71a74c858b555a7	Bacteria	Verrucomicrobia	Verrucomicrobiae	Verrucomicrobiales	Verrucomicrobiaceae	Luteolibacter
565f215f8267ea06b8cb664483dfccfb	Bacteria	Proteobacteria	Gammaproteobacteria	Chromatiales
ae8fba04ac4db9fc31a26b07b0f21a18	Bacteria	Proteobacteria	Alphaproteobacteria	Rickettsiales	mitochondria
82019e955e3bd14d0840e4fb2380a39b	Bacteria	Proteobacteria
6e0546931ed7eab1f41201aabb92be68	Bacteria	Cyanobacteria	Chloroplast	Stramenopiles
c35a6b2972c0b43c6d587fb0018a0a66	Bacteria	Verrucomicrobia	Opitutae	[Cerasicoccales]	[Cerasicoccaceae]
0705282471fdf5b0697d3f3f1b28c818	Bacteria	Acidobacteria	Sva0725	Sva0725
fd5786c34fcd869feecb36f039662457	Bacteria	Bacteroidetes	[Saprospirae]	[Saprospirales]	Chitinophagaceae
ef08764cb030535660449e8c92b6e1a6	Bacteria	Actinobacteria	Actinobacteria	Actinomycetales
7bdf6699818be9b4b699c90dd7ce60fa	Bacteria	Proteobacteria	Gammaproteobacteria	Alteromonadales	125ds10
7c6fc760f57fcf70f9f5c01491cba6d3	Bacteria	Proteobacteria	Betaproteobacteria	Ellin6067
6b584cc62950edf18667d3ed911d2bfd	Bacteria	Proteobacteria	Betaproteobacteria	Burkholderiales	Oxalobacteraceae
8c64f0527fa281dc9d8655f753ae4f1a	Bacteria	Actinobacteria	Thermoleophilia	Gaiellales	Gaiellaceae
19bd91e8011010e55c1b7885079daab8	Bacteria	Cyanobacteria	Chloroplast	Stramenopiles
55c85a40ca1205f25c14d46631b2b7b9	Bacteria	Cyanobacteria	Chloroplast	Stramenopiles
07679753a440ed50dc40f7a672484257	Bacteria	Proteobacteria	Alphaproteobacteria	Rickettsiales	mitochondria
7abac5763f12322fd437941fc0842a98	Bacteria	Proteobacteria	Betaproteobacteria
a8ae107ea5a7173460ef5f4ce01d40a3	Bacteria	Proteobacteria	Alphaproteobacteria	Rickettsiales	mitochondria
8c09c10417344faba7f62d7b0e30656a	Bacteria	Cyanobacteria	Chloroplast	Haptophyceae
d0cd696a7c6b9b768710befb3dd5f511	Bacteria	Acidobacteria	Solibacteres	Solibacterales
77aea3ba8a5c4e5ed86e8201d57e0b11	Bacteria	Bacteroidetes	Sphingobacteriia	Sphingobacteriales
518f3dedbe081d948055f9483b6947bc	Bacteria	Verrucomicrobia	Opitutae	Opitutales	Opitutaceae	Opitutus
8ff4d64b57d15523b1e0d4727e6ca107	Bacteria	Proteobacteria	Alphaproteobacteria	Rickettsiales
17d8fa66eda2c2e41b17f4dc31939958	Bacteria	Gemmatimonadetes	Gemm-3
4379fd2009ced9128218c7fa7cdbdda4	Bacteria	Bacteroidetes	Sphingobacteriia	Sphingobacteriales
35f245c1bd802d7b4c23ba7637d38188	Bacteria	Verrucomicrobia	[Spartobacteria]	[Chthoniobacterales]	[Chthoniobacteraceae]
6ef0ba7972a3d850ab53b4cff1ecc30a	Bacteria	Actinobacteria	Actinobacteria	Actinomycetales	Mycobacteriaceae	Mycobacterium
92cdfe8ee0b28a6b0d066f1746ab5904	Bacteria	Proteobacteria	Deltaproteobacteria	Desulfobacterales	Desulfobulbaceae
bc01b55cbd45e2182405976fb820530f	Bacteria	Planctomycetes	vadinHA49	DH61
a8750c0839fd0a0af5fde85a6a3d9bfb	Bacteria	Proteobacteria	Alphaproteobacteria	Rickettsiales	mitochondria
98f579859fb98a4b2e66d6d492f31fc0	Bacteria	Proteobacteria	Gammaproteobacteria	Xanthomonadales	Sinobacteraceae
38e5384f99ad54a69564ac226c7635c7	Bacteria	Proteobacteria	Alphaproteobacteria	Rickettsiales	mitochondria	Saprolegnia	ferax
b8068dace33889eaf4022e0df5427d48	Bacteria	Proteobacteria	Alphaproteobacteria	Rickettsiales
29d77e05dea600d020b0254818e1853c	Bacteria	Bacteroidetes	[Saprospirae]	[Saprospirales]
5333523b7897eab6203fcb74a1fa8161	Bacteria	Proteobacteria
c1ffec3e68d94c905a648e7664c2d2b3	Bacteria	Proteobacteria	Gammaproteobacteria	Xanthomonadales	Sinobacteraceae
90928be15bfdfac7a5ec59ed2bc88969	Bacteria	ZB3	BS119
c37a055679f34a9960a546e8cacf7ba8	Bacteria	Proteobacteria	Alphaproteobacteria	Rhodobacterales	Hyphomonadaceae
9d30737a9207c5b11e6993bed6886664	Bacteria	Proteobacteria	Gammaproteobacteria	Oceanospirillales	Halomonadaceae	CandidatusPortiera
c5958508a54927091e736d69e183b4da	Bacteria	Verrucomicrobia	[Spartobacteria]	[Chthoniobacterales]	[Chthoniobacteraceae]	CandidatusXiphinematobacter
8ca738a2c88322a5e42c580681ea2c1a	Bacteria	Bacteroidetes	[Saprospirae]	[Saprospirales]	Chitinophagaceae
7e35ae3ce923de037ae0b4da9db3734f	Bacteria	Proteobacteria	Gammaproteobacteria	[Marinicellales]	[Marinicellaceae]
305fdec60d940fa988d4065cbeebf0ca	Bacteria	Proteobacteria	Alphaproteobacteria	Rickettsiales
fbf6c6b62a1c9011fd23898ba29bcd14	Bacteria	Proteobacteria	Betaproteobacteria	Burkholderiales	Oxalobacteraceae	Ralstonia
146cc55676f9d0cbe3db888ab82cb662	Bacteria	Actinobacteria	Actinobacteria	Actinomycetales
06286452eaf199dd999b205442c434b4	Bacteria	Proteobacteria	Alphaproteobacteria	Rickettsiales	mitochondria
8105a6d84aacf46dc7a75f31acbe2580	Bacteria	Proteobacteria	Alphaproteobacteria	Rickettsiales	mitochondria
cd6ef2ccd49a082fd0bcbe311e0bb4f0	Bacteria
3a3b46147dcbdbe09e348f31da514a32	Bacteria	Cyanobacteria	Chloroplast	Stramenopiles
8be0a5fa2a4fe52c974010fa4251e19e	Bacteria	Acidobacteria	Acidobacteria-6	iii1-15
28c3ed626715510b7ddfdb86f3016744	Bacteria	Tenericutes	Mollicutes
d4af31f8aa4fd3496869159c09b5d3f3	Bacteria	Proteobacteria	Alphaproteobacteria	Rickettsiales	mitochondria
96b439ae50caea8d09730c28a828efc6	Bacteria	Proteobacteria	Betaproteobacteria	Burkholderiales	Oxalobacteraceae
297350d398d9b3e0f80db94f56bc7c62	Bacteria	Cyanobacteria	Chloroplast	Stramenopiles
2f0b5f67958497c0c8c17550513d4cef	Bacteria	Proteobacteria	Deltaproteobacteria	Desulfobacterales	Desulfobulbaceae
f239a190b75e3249a236b82b45858f2d	Bacteria	Caldithrix	Caldithrixae	Caldithrixales	Caldithrixaceae	LCP-26
788eab5c74943e4432df5819b7d1e4f5	Bacteria	Proteobacteria	Alphaproteobacteria	Rhodospirillales	Rhodospirillaceae
6376ea6dab7d0fde3cd66f53b57e1484	Bacteria	Proteobacteria	Gammaproteobacteria	Pseudomonadales	Pseudomonadaceae	Pseudomonas
88dc8d2d69d19a98b3accc3f50d82922	Bacteria	Proteobacteria
4fdc77cf1942e45cbb682c25c334ea4c	Bacteria	Proteobacteria	Alphaproteobacteria	Sphingomonadales	Erythrobacteraceae	Lutibacterium
66259507c8612e2b91a688e949cffe02	Bacteria	Actinobacteria	Acidimicrobiia	Acidimicrobiales	C111
a1ce4c8606e484d81772c756d7adda9b	Bacteria	Chlamydiae	Chlamydiia	Chlamydiales
f3a5a1bd1a38e446b3f3d31106009dd6	Bacteria	Proteobacteria	Alphaproteobacteria	Caulobacterales	Caulobacteraceae	Phenylobacterium
17447d0b860cb54cccea573e29a433a7	Bacteria	Proteobacteria	Alphaproteobacteria	Sphingomonadales	Sphingomonadaceae	Novosphingobium
a57db23dc5a5d17ed1a34d0a994a1fc8	Bacteria	Proteobacteria	Alphaproteobacteria	Rickettsiales	mitochondria	Thalassiosira	pseudonana
e7bb9262d4a46496167a210fc459688d	Bacteria	Proteobacteria	Betaproteobacteria	Burkholderiales	Comamonadaceae	Hydrogenophaga
c344c6c584c663a222c735d50eabb47d	Bacteria	Proteobacteria	Alphaproteobacteria	Rickettsiales	mitochondria
670944fc1b5284d03116d9aebd947afd	Bacteria	Bacteroidetes	Flavobacteriia	Flavobacteriales	Cryomorphaceae	Fluviicola
87936ddcccdbf8a98f00aa1b9a07d8ed	Bacteria	Proteobacteria	Deltaproteobacteria	Desulfobacterales	Nitrospinaceae	Nitrospina
7a67829240bc3b836b920318f67c4b1a	Bacteria	Acidobacteria	Solibacteres	Solibacterales	Solibacteraceae	CandidatusSolibacter
1404c6723372dab5cfe8f58686f32075	Bacteria	Verrucomicrobia	Verrucomicrobiae	Verrucomicrobiales	Verrucomicrobiaceae
22aedf9abf7a24a2596726b38435025a	Bacteria	Verrucomicrobia	[Spartobacteria]	[Chthoniobacterales]	[Chthoniobacteraceae]	CandidatusXiphinematobacter
c1d9eada909d2d5dbe078f25f1038508	Bacteria	Proteobacteria	Betaproteobacteria	Burkholderiales	Comamonadaceae
800e35a1987c1d984f1cb34a22702c1f	Bacteria	Proteobacteria	Alphaproteobacteria	Rhodobacterales	Rhodobacteraceae
bb318602c562f882b371bc9d88d0ce5c	Bacteria	Proteobacteria	Alphaproteobacteria	Rickettsiales	mitochondria
2c31849e1e781d2fc1712b57a6a92885	Bacteria	Planctomycetes	Planctomycetia	Pirellulales	Pirellulaceae
173732da6e539c4e1e8cc90f79b55bd9	Bacteria	Proteobacteria	Deltaproteobacteria	Myxococcales	Myxococcaceae
7811b6ee66da4683522fbbfebc0d5224	Bacteria	Actinobacteria	Actinobacteria	Actinomycetales	Microbacteriaceae
f84f321abce9dde03092c462069e0111	Bacteria	Proteobacteria	Alphaproteobacteria	Rickettsiales	mitochondria
b78620b6d0446601dbf2e37dded1bae2	Bacteria	Proteobacteria	Alphaproteobacteria	Rickettsiales	mitochondria
fbaefeb0df8b989a5a795130c177831c	Bacteria	Bacteroidetes	[Saprospirae]	[Saprospirales]	Chitinophagaceae
96ae3e9d4ef1699d9f4349025dd58e8c	Bacteria	Cyanobacteria	4C0d-2	MLE1-12
c3aa11832636cb971c3c9e577c30f881	Bacteria	TM6	SJA-4
7a1dc43a27918a71f4073c2faad5f13f	Bacteria	Proteobacteria	Alphaproteobacteria	Rhodospirillales	Rhodospirillaceae
bf7312663bb8d8c2ef838cc6b788fe48	Bacteria	Proteobacteria	Betaproteobacteria
29aed4cf137f94ba1e04cbcbc9a7f00b	Bacteria	Planctomycetes	Planctomycetia	Planctomycetales	Planctomycetaceae	Planctomyces
b7d6cf3f7467ca45087ca083796a0af0	Bacteria	Proteobacteria	Betaproteobacteria	Burkholderiales	Comamonadaceae	Polaromonas
eda253fbbfa164d5b5b159a586e84bcf	Bacteria	Proteobacteria	Betaproteobacteria	MND1
5e540e5399ed4d1cee781d4282a68507	Bacteria	Proteobacteria	Gammaproteobacteria	Alteromonadales
99d820559eec1551e7752386d7916c03	Bacteria	Chlamydiae	Chlamydiia	Chlamydiales	Rhabdochlamydiaceae	CandidatusRhabdochlamydia
d70adaf7d3d98a3004a9dcf45f734e64	Bacteria	Bacteroidetes	Sphingobacteriia	Sphingobacteriales
d728ca7d99a8a29d8d689e015c7b7c26	Bacteria	Cyanobacteria	Chloroplast	Chlorophyta	Trebouxiophyceae
a3e349c0dc4e06e199630dcaa5e5b2e4	Bacteria	Cyanobacteria	Chloroplast	Stramenopiles
9b27e135979689d70d504c618e9f2138	Bacteria	Acidobacteria	OS-K
27e159d619cf0d701d1e2c8716eafb14	Bacteria	Bacteroidetes	Sphingobacteriia	Sphingobacteriales
94f24a78e4aa318756fc85e395f3df3c	Bacteria	Proteobacteria	Alphaproteobacteria	Rhodospirillales	Rhodospirillaceae
3661925a0f7ce8f3050c372e1b124ad5	Bacteria	Proteobacteria	Gammaproteobacteria	Alteromonadales	Shewanellaceae	Shewanella
eae535b10eeeca0d29c5c97e3e0c9abd	Bacteria	Bacteroidetes	[Saprospirae]	[Saprospirales]	Chitinophagaceae
1a42a89cb9a6a5c503049a45d4fa3130	Bacteria	Actinobacteria	Actinobacteria	Actinomycetales	ACK-M1
a30303e40a813796d55d05cf4a550231	Bacteria	Cyanobacteria	Chloroplast	Haptophyceae
edbafd4bb2335ff703b39312f6da76b1	Bacteria	Bacteroidetes	[Saprospirae]	[Saprospirales]	Chitinophagaceae
0bcf4d29395fa40a972843fa31ee6d8a	Bacteria	Proteobacteria	Deltaproteobacteria	Syntrophobacterales	Syntrophobacteraceae
c353d088f430a354906ab7e0f14c8c5d	Bacteria	PAUC34f
c23d221ef4d2c66d2f0bc6d9371d0e9c	Bacteria	Proteobacteria	Betaproteobacteria	Burkholderiales
18e2e7b8bc06ff7d03aa1846beb7848b	Bacteria	Proteobacteria	Gammaproteobacteria	Legionellales	Coxiellaceae	Aquicella
48ad9b5bbf12b65767448b349b7c6ca6	Bacteria	Bacteroidetes	Sphingobacteriia	Sphingobacteriales
b3b7bd6f53061f87325fe905486dbe74	Bacteria	Proteobacteria	Betaproteobacteria	Burkholderiales	Comamonadaceae	Pelomonas	puraquae
8574ce4a53962d679c8a47abc12033e4	Bacteria	Proteobacteria	Alphaproteobacteria	Rickettsiales	mitochondria
41e56aeb5317c0ffdc847bb0bd4544d7	Bacteria	Proteobacteria	Alphaproteobacteria	Rickettsiales	mitochondria
107ecdf382f2b6d789d697fc2a10b623	Bacteria	Bacteroidetes	Flavobacteriia	Flavobacteriales	Flavobacteriaceae	Flavobacterium
5638d8b8d1658ee61e5f5ffa6228c1a7	Bacteria	Proteobacteria	Gammaproteobacteria	Xanthomonadales	Sinobacteraceae
ff98ab846c8f29e5e5f5cce385b28a7b	Bacteria	Proteobacteria	Gammaproteobacteria	Xanthomonadales	Sinobacteraceae
b1e3d80d7cc83963eda491587548e6d5	Bacteria	Cyanobacteria	Chloroplast	Stramenopiles
c2ab4fd0ba77d5f7f6be514f1bdd4cc8	Bacteria
28bc4d20befe48bd9fc12456d11ad7d5	Bacteria	Bacteroidetes	[Saprospirae]	[Saprospirales]	Chitinophagaceae
540b4a5d066b0aabd0947d4068b0ee3a	Bacteria	Proteobacteria	Deltaproteobacteria	Desulfobacterales	Desulfobulbaceae
05db7360f0cfd0cb15b8802be7b58964	Bacteria	Proteobacteria	Alphaproteobacteria	Rhodospirillales	Rhodospirillaceae
ce63ae5ff8e285a1d97f84772d6344f2	Bacteria	Proteobacteria	Deltaproteobacteria	Desulfobacterales	Desulfobacteraceae
84f17f89e51942242021b8668202aec6	Bacteria	Chlamydiae	Chlamydiia	Chlamydiales	Rhabdochlamydiaceae	CandidatusRhabdochlamydia
d76cd4f1a17908bca2d51d623b594469	Bacteria	Proteobacteria	Gammaproteobacteria	[Marinicellales]	[Marinicellaceae]
4b7560eaea37db0087a28987b1cc6e0b	Bacteria	Proteobacteria	Alphaproteobacteria	Rickettsiales	Rickettsiaceae
ec8d82ca81b640042cc59f84966cca3c	Bacteria
ac2a47483fc2b022dda36267cd67ac80	Bacteria	Bacteroidetes	[Saprospirae]	[Saprospirales]	Chitinophagaceae	Sediminibacterium
0976b9fe474c38437f03f1dab2eb80c0	Bacteria	Proteobacteria	Alphaproteobacteria	Rhodospirillales	Acetobacteraceae
c5b2a2228f1aef6f2546ed60d43b5c51	Bacteria	Cyanobacteria	Chloroplast	Haptophyceae
6d2726a8618a4a00b5a2d8ee65ba0904	Bacteria	Bacteroidetes	Flavobacteriia	Flavobacteriales	Flavobacteriaceae	Flavobacterium
e661631d2518f3793d6269ccf30dde1c	Bacteria	Proteobacteria	Gammaproteobacteria	Thiotrichales	Piscirickettsiaceae
b6c29e44f5719777e53de1a91472c8b4	Bacteria	Bacteroidetes	Flavobacteriia	Flavobacteriales	Flavobacteriaceae	Maribacter	polysiphoniae
67dab9714532e2e5809db3032111ff86	Bacteria
ab52dbacef166ea6bd9ac77895a25a3b	Bacteria	Bacteroidetes	Bacteroidia	Bacteroidales	Porphyromonadaceae	Paludibacter
4c608070692be694f2714e1505992bac	Archaea	Crenarchaeota	Thaumarchaeota	Cenarchaeales	Cenarchaeaceae	Nitrosopumilus
ca8ff83198bba26e7e78f02eceb66779	Bacteria	Proteobacteria	Alphaproteobacteria	Rickettsiales	mitochondria
001d49fb339777c4d3f9eda082fdc521	Bacteria	Proteobacteria	Deltaproteobacteria	Myxococcales
f8ae1e290e95e28572ada1e76b839cdd	Bacteria	Bacteroidetes	[Saprospirae]	[Saprospirales]	Saprospiraceae	Saprospira
3c97fe3589ece86d7039d209dedf0e9d	Bacteria	Bacteroidetes	Sphingobacteriia	Sphingobacteriales
c2d7fec849de8a148e40b5a6c35cc1c8	Bacteria	Proteobacteria	Epsilonproteobacteria	Campylobacterales	Helicobacteraceae	Sulfuricurvum	kujiense
3e125655918e305a3842a79b6972775f	Bacteria	Proteobacteria	Alphaproteobacteria	Rhodospirillales	Acetobacteraceae
09e941a637a7c8284e4e84853cf5b804	Bacteria	Proteobacteria	Alphaproteobacteria
4d06ad9c87671acd6ef92de3bb6493a2	Bacteria	Cyanobacteria	Synechococcophycideae	Synechococcales	Synechococcaceae	Synechococcus
9f7749b8adac3326ec2b2e6099532a2b	Bacteria	Bacteroidetes	Flavobacteriia	Flavobacteriales	Flavobacteriaceae	Flavobacterium
89e9892f469729476829d9a26df453f7	Bacteria	Chlamydiae	Chlamydiia	Chlamydiales	Parachlamydiaceae	Neochlamydia	hartmannellae
2e180c84af91886e7de0c8723314e596	Bacteria	Proteobacteria	Alphaproteobacteria	Rickettsiales	Rickettsiaceae
7f2c18992500c2d1f4006df02e4996b6	Bacteria	Gemmatimonadetes	Gemm-1
a0203d8d06f73014af0194ada6f68970	Bacteria	Proteobacteria	Alphaproteobacteria	Rhodobacterales	Rhodobacteraceae	Rhodobacter
5a5337b158b0417cfe528b0bbf960fca	Bacteria	Cyanobacteria	Chloroplast
d63bc9311b81c42939650494b716b7c7	Bacteria	Proteobacteria	Alphaproteobacteria	Rickettsiales	mitochondria	Ochromonas	danica
8694aeadd181294daddeab35500fc3ba	Bacteria	Actinobacteria	Thermoleophilia	Solirubrobacterales	Conexibacteraceae
9c6e2614e9586406f4b6a9dc0fa35c39	Bacteria	Proteobacteria	Alphaproteobacteria	Rhodospirillales	Rhodospirillaceae	Magnetospirillum
bdbacd1617b11e320d0247582efd0581	Bacteria
688974d66960ec3e549c1a2a80bc05b0	Bacteria	Proteobacteria	Alphaproteobacteria	Rhodospirillales	Rhodospirillaceae
4be73cbbba127773139adf95d5c5c1bf	Bacteria	Proteobacteria	Gammaproteobacteria
1de8d461eb9271ff4c0a9ec27e0aeb03	Bacteria	TM7	SC3
0149c13a46858801cc17e1dbc15437c0	Bacteria	Proteobacteria	Gammaproteobacteria	Chromatiales	Ectothiorhodospiraceae
d8889747097266a8731c1a890e1378f2	Bacteria	Proteobacteria	Gammaproteobacteria	Chromatiales	Ectothiorhodospiraceae
c4538ac09d8c02440559daeaafcd095c	Bacteria	Proteobacteria	Deltaproteobacteria
e7e8628e1a330dcf280ed5a20d96e7ea	Bacteria	Planctomycetes	Planctomycetia	Pirellulales	Pirellulaceae
b67e07843fb89378c95ebcf999b0d585	Bacteria	Proteobacteria	Deltaproteobacteria	Bdellovibrionales	Bacteriovoracaceae
50876498e9c8139169b253a18c5fa132	Bacteria	Verrucomicrobia	Opitutae	Puniceicoccales	Puniceicoccaceae	Coraliomargarita
1a9e1b218541ab17bd3b44fcb599d883	Bacteria	Proteobacteria	Alphaproteobacteria	Rickettsiales	mitochondria
21088f1206c3a1b9594c7ca350461e9d	Bacteria	Bacteroidetes	Cytophagia	Cytophagales	Cytophagaceae
8be5b208c15b7511751d16fdf7a13be4	Bacteria	Bacteroidetes	Bacteroidia	Bacteroidales	Porphyromonadaceae	Paludibacter
db5845126f0911a9cbbb4933789b16ff	Bacteria	Proteobacteria	Deltaproteobacteria	Desulfobacterales	Desulfobacteraceae	Desulfococcus
11a0c670fa78234d1e1af0fa2993acc5	Bacteria	Verrucomicrobia	[Pedosphaerae]	[Pedosphaerales]	R4-41B
5afec052157f7768bf459883f118a638	Bacteria	Bacteroidetes	Flavobacteriia	Flavobacteriales	Flavobacteriaceae	Flavobacterium	succinicans
056aa9f00b57269231907d97228aff1b	Bacteria	Bacteroidetes	[Rhodothermi]	[Rhodothermales]	Rhodothermaceae
3cd4a17c38c1cd155522fd86e18d57a2	Bacteria	Bacteroidetes	Flavobacteriia	Flavobacteriales
deef40a69e31639a2389778790f0c370	Bacteria	Bacteroidetes	Sphingobacteriia	Sphingobacteriales	NS11-12
355b943e75d6bc47620d280fb44d09b6	Bacteria	Proteobacteria	Betaproteobacteria	Burkholderiales	Comamonadaceae
d7b4047d9f1357b50df067c3821c58fe	Bacteria	Bacteroidetes	Sphingobacteriia	Sphingobacteriales
b1514260e55f51a24a6e0ca85cbfd428	Bacteria	Proteobacteria	Alphaproteobacteria	Rhizobiales	Phyllobacteriaceae
50451a70e9ff33521f2bae20026ae325	Bacteria	Proteobacteria	Alphaproteobacteria	Rhodospirillales	Rhodospirillaceae
cadab640e721ebedf3a98194c976aab3	Bacteria	Proteobacteria	Betaproteobacteria	Burkholderiales	Comamonadaceae
72c0694cbe32a649ea374e847c3128ca	Bacteria	Proteobacteria	Alphaproteobacteria
e87f2dec671854bae47c21738dc2bc9f	Bacteria	Cyanobacteria	Chloroplast	Stramenopiles
a65a721d90a7e48010113435818d69be	Bacteria	Proteobacteria	Gammaproteobacteria	Xanthomonadales	Sinobacteraceae
ca019dc1f7991a3f2a30faf861bee144	Bacteria	Acidobacteria	Acidobacteria-6	CCU21
189f03c207a924688e657f0c21d62994	Bacteria	Cyanobacteria	Chloroplast	Chlorophyta	Chlamydomonadaceae	Oophila	amblystomatis
d3abe1faede5b7e0d247455636cf04cf	Bacteria	Actinobacteria	Acidimicrobiia	Acidimicrobiales	koll13
b16940ce2aeb7eff42e9597e276356cc	Bacteria	Bacteroidetes	Cytophagia	Cytophagales
2558bc333fb417006fcefd080a265d7c	Bacteria	Proteobacteria	Alphaproteobacteria	Sphingomonadales	Sphingomonadaceae
6a79db8271cf2f1264579d0f016f50d9	Bacteria	Proteobacteria	Deltaproteobacteria	Spirobacillales
381db3e70aaca7167c53dfdb4421f0e1	Bacteria	Cyanobacteria	Chloroplast	Stramenopiles
557626f1cdcad76867354e7512ca5c1a	Bacteria	Proteobacteria
b0238dade6e445fd3558fae596aa02b9	Bacteria	Actinobacteria	Actinobacteria	Actinomycetales
a145a0d4401bd6399024a46c933fe0e4	Bacteria	Verrucomicrobia	[Spartobacteria]	[Chthoniobacterales]	[Chthoniobacteraceae]	CandidatusXiphinematobacter
647b46bc5fa0fadf81008c9a121c2dd2	Bacteria	Proteobacteria	Epsilonproteobacteria	Campylobacterales	Helicobacteraceae	Sulfuricurvum	kujiense
7a5001defcd84e20fc08dc6edce70749	Bacteria	Cyanobacteria	Chloroplast	Stramenopiles
ac74eb9e18ab45ed560fe7ad979e3b0f	Bacteria	Proteobacteria	Alphaproteobacteria	Rhodobacterales	Rhodobacteraceae	Rhodobacter
1081caf84c2880becc0fb26c7cd50375	Bacteria	TM7	SC3
97b802aebea65d5442aee460e98ff942	Bacteria	Firmicutes	Clostridia	Clostridiales	Symbiobacteriaceae	Symbiobacterium
afaab28f537a72577d22fb00949df1f6	Bacteria	Proteobacteria	Betaproteobacteria	Burkholderiales	Comamonadaceae	Polaromonas
938feb0428f9b9120bdaa88b50212aaa	Bacteria	Proteobacteria	Alphaproteobacteria	Rickettsiales	Rickettsiaceae
fe142922b7b51fd41dc43e37a7b91553	Bacteria	Bacteroidetes	[Saprospirae]	[Saprospirales]	Saprospiraceae
e84bb7053a763a2a7aca18d3bc471605	Bacteria	Proteobacteria	Alphaproteobacteria	Rhodobacterales	Rhodobacteraceae
fd766e1f3f7ec623acb88b66c5b32629	Bacteria	Proteobacteria	Deltaproteobacteria	MBNT15
cc1b71cea293aea29f3b7ce2cff979d7	Bacteria	Gemmatimonadetes	Gemm-1
a3dfb398fac941fb1b568b3e3a5f10e0	Bacteria	Proteobacteria
c4c5b5884fd661baf982557a5559354a	Bacteria	Bacteroidetes	Sphingobacteriia	Sphingobacteriales	Sphingobacteriaceae
6fee57a3194021d6d0f5608ebb3ed0d1	Bacteria	Proteobacteria	Gammaproteobacteria	Legionellales
834e2b9dc7d4bb1722cdff78dedefd1a	Bacteria	Cyanobacteria	Nostocophycideae	Nostocales	Nostocaceae	Nodularia
d21770e0ebd5bfa0f229a0ede28286ff	Bacteria	Proteobacteria	Gammaproteobacteria	Legionellales
ea04f2ed70b8a9ae88900506b4bfba03	Bacteria	Bacteroidetes	Flavobacteriia	Flavobacteriales	Cryomorphaceae	Fluviicola
d464aeb9d76d2c31ab25f8a630439a35	Bacteria	Proteobacteria	Alphaproteobacteria	Rhodobacterales	Rhodobacteraceae	Paracoccus
62eefd6e21210551c20a91a4a49a00fd	Bacteria	Proteobacteria
07b5efe4e9b8fa889bcdafbaa1a898ee	Bacteria	Bacteroidetes	Flavobacteriia	Flavobacteriales	Cryomorphaceae
2b59b12eab282e1b24f417f0fe94274c	Bacteria	Verrucomicrobia	[Pedosphaerae]	[Pedosphaerales]	auto67_4W
f5cb58f5143fec655c2e6449846bba4a	Bacteria	Verrucomicrobia	[Spartobacteria]	[Chthoniobacterales]	[Chthoniobacteraceae]	CandidatusXiphinematobacter
5fe8a79baa0e9601bc73ff3938dbf497	Bacteria	Proteobacteria	Alphaproteobacteria	Sphingomonadales	Sphingomonadaceae	Sphingobium
a1105eb636b7ce53bb27988757ba9a04	Bacteria	Proteobacteria	Gammaproteobacteria	[Marinicellales]	[Marinicellaceae]
685e82838c690c9fe4faf534efedc204	Bacteria	Proteobacteria	Deltaproteobacteria	Desulfobacterales	Desulfobulbaceae
840ca9f3379bb9dd83d910e9ebafd922	Bacteria	Bacteroidetes	Sphingobacteriia	Sphingobacteriales
cb0a076fb0407d9f3f0171000ec7e90c	Bacteria	Acidobacteria	[Chloracidobacteria]	RB41	Ellin6075
86e7e9036730017997a58f33c93d55c7	Bacteria	Proteobacteria	Betaproteobacteria	Procabacteriales	Procabacteriaceae
85d5b2895bffe228e0f48cebce318476	Bacteria	Cyanobacteria	Chloroplast	Haptophyceae
50dad88c23a442292efc4848346a0e8c	Bacteria	Bacteroidetes	Sphingobacteriia	Sphingobacteriales
a49a7c5fdd8eb836614d65f8efbfb4b6	Bacteria	Proteobacteria	Alphaproteobacteria	Rickettsiales	mitochondria
bc2fb39def257ffa17773333df88122b	Bacteria	Actinobacteria	Thermoleophilia	Gaiellales
880c8193037a4f84292b4adb9171533a	Bacteria	Bacteroidetes	Bacteroidia	Bacteroidales	VC21_Bac22
cebaa29930136dea0865112cf3583605	Bacteria	Bacteroidetes	[Saprospirae]	[Saprospirales]	Saprospiraceae
d10ffe77ef854be5b82b63580147d41d	Bacteria	Proteobacteria	Deltaproteobacteria	NB1-j	JTB38
e44ec1313a645c0e18b0a95669b5c1be	Bacteria
868e0165fe32a8925b7f20afa5e1dbfc	Bacteria	Proteobacteria	Betaproteobacteria	Burkholderiales	Comamonadaceae	Acidovorax
7fbf4a99f476e7db2cbef86297c2527a	Bacteria	Proteobacteria	Betaproteobacteria
8e7bcaada3e1a3acd35729a53b027481	Bacteria	OP3	BD4-9
7dbaa1a3b50c48dcae10b978f4958a89	Bacteria	Bacteroidetes
15c1c3c6b3755a72c95a9cdc9ec5ad28	Bacteria	Cyanobacteria	Nostocophycideae	Nostocales	Nostocaceae	Nodularia
6e6f4d1ea594ee839ee0d1d081a0cd5b	Bacteria
839896dc619d81db2d18bf5739691a36	Bacteria	Proteobacteria	Deltaproteobacteria	Desulfuromonadales	Geobacteraceae	Geobacter
e9eb44c3de98f0db34aafa03331d1a39	Bacteria	Proteobacteria	Epsilonproteobacteria	Campylobacterales
64db8404bb5d297d9e37f6fb3ad2010c	Bacteria	Planctomycetes
ede684fe9fbe6404a21995c912a5862b	Bacteria	Proteobacteria	Alphaproteobacteria	Sphingomonadales
452004bfc4981f8d4a913fce0860a8c8	Bacteria	Acidobacteria	Acidobacteria-6	iii1-15	RB40
7d217addfd80cb5393d81dae5f160367	Bacteria	Proteobacteria	Betaproteobacteria	Burkholderiales	Comamonadaceae	Schlegelella
4cf91110ab84f70072d3049a6f1215ce	Bacteria	GN02	BD1-5
54163dcbe4ea5f5c8f4c2041f3221136	Bacteria	Proteobacteria	Deltaproteobacteria	Myxococcales	OM27
34aa6c5419744d81f8075eade565b9ea	Bacteria	Planctomycetes	Planctomycetia	Planctomycetales	Planctomycetaceae	Planctomyces
329f692a592e619363ad944c9f337e99	Bacteria	Cyanobacteria	Chloroplast
4f8d723af22a17f6fb2fc77695e50478	Bacteria	Proteobacteria	Gammaproteobacteria
db30bfa14b0cd36a31d9d1bd5aae464f	Bacteria	Proteobacteria	Alphaproteobacteria	Rhizobiales
09fa1db71e04ce4cd7861ad04b994826	Bacteria	Proteobacteria	Alphaproteobacteria	Rickettsiales	mitochondria
fc0381c6cdd4fe790bbd0b7a15d0bad0	Bacteria	Proteobacteria	Gammaproteobacteria	Alteromonadales	Alteromonadaceae
bce01652cc5cb47aa66ddf13931362da	Bacteria	Proteobacteria	Alphaproteobacteria	Rickettsiales	Rickettsiaceae
90dfecb460635dce34e7e68f3b48d7c3	Bacteria	Gemmatimonadetes	Gemm-1
2d764b109a11f2c5ca30f0bb59e5d9b6	Bacteria	Proteobacteria	Gammaproteobacteria	Alteromonadales	Alteromonadaceae	Simiduia	agarivorans
595e3f9fc0e7b5f94481938cb8d2e13d	Bacteria	Verrucomicrobia	Verruco-5	WCHB1-41
b9c0071a4a0d01910f452316a66b5504	Bacteria	Proteobacteria	Gammaproteobacteria	Legionellales	Legionellaceae
2fe63a06a460d592fc3dcbe61daf76ba	Bacteria	Cyanobacteria	Chloroplast	Chlorophyta	Chlamydomonadaceae	Oophila	amblystomatis
81c28960ad28db5d3ee44a4a9422e128	Bacteria
fcb9d94e96f59759dcb5d195b08194eb	Bacteria	Proteobacteria	Deltaproteobacteria	Myxococcales	Haliangiaceae
4c54bc88e7a006615f92a623f22d83f9	Bacteria	Proteobacteria	Alphaproteobacteria	Rhizobiales	Hyphomicrobiaceae	Rhodoplanes
5fc7e6ef6a5cfda515cd05468202e6bf	Bacteria	Proteobacteria	Alphaproteobacteria	Rhodobacterales	Rhodobacteraceae	Rhodobacter
c1ee0c7bd2a5652c66779004eebac27c	Bacteria	Proteobacteria	Gammaproteobacteria	Xanthomonadales	Xanthomonadaceae
fd8bc24249627703cab895d1b8109c57	Bacteria	Proteobacteria	Gammaproteobacteria	Thiotrichales	Piscirickettsiaceae
46069e64d3e77fef53e74bc3f1f037c0	Bacteria	Bacteroidetes	Flavobacteriia	Flavobacteriales	Cryomorphaceae
5b890ae51bd10d65f26ef81fd3579f7e	Bacteria	Proteobacteria	Alphaproteobacteria	Rhodospirillales	Rhodospirillaceae
a21fc26b0d5f89da6136be69e1380e65	Bacteria	Proteobacteria	Betaproteobacteria	Burkholderiales	Comamonadaceae	Hydrogenophaga
ce42c209b5ecb70cb225c560cf5f9366	Bacteria	Proteobacteria
662380f2b6f56586220b1d15f7da48f8	Bacteria	Cyanobacteria	Chloroplast	Haptophyceae
114903237acb8b72b598e66b8cfd9707	Bacteria	Proteobacteria	Alphaproteobacteria	Sphingomonadales	Sphingomonadaceae	Sandarakinorhabdus	limnophila
00127c947978d94064c88b00340c48e4	Bacteria	Proteobacteria	Gammaproteobacteria	Alteromonadales	211ds20
1f582b58a39968c91ff3f3c2d6405e01	Bacteria	Chlamydiae	Chlamydiia	Chlamydiales
6615f072555946b71daf9ffb35165f74	Bacteria	Bacteroidetes	[Saprospirae]	[Saprospirales]	Saprospiraceae
9311721dbd02cbe64c33d0223aff2ec7	Bacteria	Proteobacteria	Alphaproteobacteria	BD7-3
d68f525366c1dfdc0984a90b89867e95	Bacteria	Actinobacteria	Actinobacteria
b7a07939d4875f2d87d9a355a769398a	Bacteria	Proteobacteria	Betaproteobacteria	Gallionellales	Gallionellaceae	Gallionella
b2e124c33efae55b5917ca10bedaca06	Bacteria	Chloroflexi	Ellin6529
abab274ac41811f11c506a82ad9cb9d1	Bacteria	Proteobacteria	Alphaproteobacteria	Rhodospirillales	Acetobacteraceae
18530d3a6625499fe053c53923541441	Bacteria	Cyanobacteria	Synechococcophycideae	Synechococcales	Synechococcaceae	Synechococcus
5513b02952faf7f0a9b40c7a5eaab2aa	Bacteria	Proteobacteria	Alphaproteobacteria	Rhodospirillales	Rhodospirillaceae
a27f7ed774aa19d64402a2e223fa4146	Bacteria	Proteobacteria	Deltaproteobacteria	Desulfobacterales	Desulfobulbaceae
652189e2b12b784b904537c41260bfa6	Bacteria	Actinobacteria	Acidimicrobiia	Acidimicrobiales
db9eecf8306b14682074e5332d07306a	Bacteria	Cyanobacteria	Synechococcophycideae	Synechococcales	Synechococcaceae	Paulinella
aef0c11cff884a5e04166129fac0ba78	Bacteria	Proteobacteria	Betaproteobacteria	Methylophilales
7f945a4d8cf0505a3cac0dc02815b09a	Bacteria	Proteobacteria	Gammaproteobacteria	Legionellales	Coxiellaceae
c2df4f2ca8d6cfb22c527e420abc9c7c	Bacteria	Proteobacteria	Alphaproteobacteria	Rickettsiales	mitochondria
cee15aadf10b9cf987099007d11b489f	Bacteria	Bacteroidetes	[Saprospirae]	[Saprospirales]
ef6b3ab6c6bef357dae19bdefd3df6eb	Bacteria	Proteobacteria
c2d2407a6a3fe62616cb3cd837468d5f	Bacteria	Proteobacteria	Alphaproteobacteria	Rickettsiales
091170abb20a86c5fcf5b7e7979aa281	Bacteria	Bacteroidetes	Sphingobacteriia	Sphingobacteriales
a04b601c3aab72f258b8668a4fed76a4	Bacteria	Proteobacteria	Gammaproteobacteria	Oceanospirillales	Halomonadaceae	CandidatusPortiera
285bfcf58e6f5f2669ba8a2efb4ed898	Bacteria	Verrucomicrobia	Verrucomicrobiae	Verrucomicrobiales	Verrucomicrobiaceae	Prosthecobacter
9117c10a38db3805db93f4a1312648ae	Bacteria	Cyanobacteria	Chloroplast	Cryptophyta
02b215b61d48b2c254fd40b36603d80d	Bacteria
90aca794c7e30b8a77e87f13ffc9a5cc	Bacteria	Proteobacteria	Alphaproteobacteria	Rhizobiales	Hyphomicrobiaceae	Rhodoplanes
1ff9a6e12e87230d78503120af626507	Bacteria	Bacteroidetes	Cytophagia	Cytophagales	Cytophagaceae
cfd9a5b9d95deeac5395a6ecbefcf7a0	Bacteria	Proteobacteria	Deltaproteobacteria	NB1-j	JTB38
5d9f8d99036f4dcd80a88b9ebddd01e9	Bacteria	Proteobacteria	Deltaproteobacteria	NB1-j
59364744507fc064189cc76039389725	Bacteria	Proteobacteria	Betaproteobacteria	Burkholderiales	Comamonadaceae
9bdcfd7f710d722cd09afd800cf580f3	Bacteria	Cyanobacteria	Chloroplast	Stramenopiles
49295cd5555beb1967621c37127ef86e	Bacteria	OD1
875323affec03ddd73e936f888fac408	Bacteria	Actinobacteria	Acidimicrobiia	Acidimicrobiales
a3ddccc10b27de590463f3fffd971766	Bacteria	Proteobacteria	Alphaproteobacteria	Caulobacterales	Caulobacteraceae
b54f2bc11a015936658c0a48a3272701	Bacteria	Actinobacteria	Actinobacteria	Actinomycetales	Microbacteriaceae
d16453ff3f55394eae657c53098f7983	Bacteria	Cyanobacteria	Chloroplast	Stramenopiles
9912705b17e1f43b29329c993ff0bb5d	Bacteria	Proteobacteria	Alphaproteobacteria	Rickettsiales	mitochondria
f6098e76342dba0e2b1c09e56b69ab58	Bacteria	Bacteroidetes	[Saprospirae]	[Saprospirales]	Saprospiraceae
525d21cbb3e57bc95345ffee7eccc02f	Bacteria	Proteobacteria	Alphaproteobacteria	Rickettsiales	Rickettsiaceae
1338e4019753274936ef0ce2a3188c9d	Bacteria	Bacteroidetes	Flavobacteriia	Flavobacteriales	Cryomorphaceae	Fluviicola
e5e78baf5242a06bb692cb67ca33e0c8	Bacteria	Bacteroidetes	[Saprospirae]	[Saprospirales]	Saprospiraceae
a1d83433e07f97fd446f7ff512e44fc6	Bacteria	Proteobacteria	Betaproteobacteria	Burkholderiales	Comamonadaceae	Comamonas
1f2c5cee479756b4c1d168271ca131d5	Bacteria	Proteobacteria	Alphaproteobacteria	Rhizobiales	Xanthobacteraceae	Xanthobacter
bfe9a8191ec9959c26c941a593f7099b	Bacteria	Proteobacteria	Alphaproteobacteria
407af3f279fd058b8c3c98f55b466ac0	Bacteria	Cyanobacteria	Chloroplast	Stramenopiles
581600b81676b283c0f8b9ce9e1bf365	Bacteria	Verrucomicrobia	[Pedosphaerae]	[Pedosphaerales]	R4-41B
19ef24ebb904f7bac700ad897a8a63d8	Bacteria
13f40a76be08f92d0fc1420618c13eed	Bacteria	Proteobacteria	Gammaproteobacteria	[Marinicellales]	[Marinicellaceae]
7437cd20a064cce555c460bad3f7dc90	Bacteria	Proteobacteria	Gammaproteobacteria	Alteromonadales	OM60
cae922fc2f026c29b1b08332484f6a88	Bacteria	Proteobacteria	Gammaproteobacteria	[Marinicellales]	[Marinicellaceae]
36ecebe2b77035b9d647a629501786a8	Bacteria	Proteobacteria	Gammaproteobacteria	Xanthomonadales	Xanthomonadaceae
436d908febeb7a9c67879b27be16ff64	Bacteria	Chlorobi	OPB56
51e371ec276da92f57b556aa33a60f57	Bacteria	Actinobacteria	Acidimicrobiia	Acidimicrobiales	Microthrixaceae
41e6c0b55654af1d5cd503359fb77d18	Bacteria	Proteobacteria	Alphaproteobacteria	Caulobacterales	Caulobacteraceae	Mycoplana
52ac7f5154090ed4a3e06cfee0d6a43a	Bacteria	Caldithrix	Caldithrixae	Caldithrixales	Caldithrixaceae
de0d4f1686c3073a5cdd32c818c469ef	Bacteria	Proteobacteria	Alphaproteobacteria	Rhodospirillales	Rhodospirillaceae
7eead715e53728a40aeb5424f043f4b8	Bacteria	Proteobacteria	Alphaproteobacteria	Rickettsiales	mitochondria
a87828c66373f2f98c6c62447aca380b	Bacteria	Cyanobacteria	Chloroplast
c9098d06784a3bfa5003de9905262c41	Bacteria	Proteobacteria	Gammaproteobacteria	Xanthomonadales	Xanthomonadaceae
514e3e07ccbf14d3f8584457ccb2d3b8	Bacteria	Bacteroidetes	Flavobacteriia	Flavobacteriales	Flavobacteriaceae	Flavobacterium	gelidilacus
19c834fa014dd89a5fd8ddb3563e40b7	Bacteria	Proteobacteria	Alphaproteobacteria	Caulobacterales	Caulobacteraceae	Phenylobacterium
45976687d77be870c66bcf354f4da764	Bacteria	Nitrospirae	Nitrospira	Nitrospirales	[Thermodesulfovibrionaceae]	GOUTA19
824d1cc1619a128a3dc45077c76b4a12	Bacteria	Proteobacteria	Alphaproteobacteria	Rickettsiales	mitochondria
c416b63bd3509a6df8d6212932fd916e	Bacteria	Cyanobacteria	Chloroplast	Stramenopiles
71e3146b9f994cef2f3fb4577a188aa3	Bacteria	Proteobacteria	Alphaproteobacteria	Rickettsiales	mitochondria
ef14c74a76414a3c7a569157e07e086b	Bacteria	Proteobacteria	Betaproteobacteria	SC-I-84
3b75371c9bbc5ca9cde3bb4d2c240afd	Bacteria	Verrucomicrobia	Opitutae	Opitutales	Opitutaceae	Opitutus
a3fd582e3c6b747be66e34bd67a690c4	Bacteria	Fibrobacteres	Fibrobacteria	258ds10
40f03404f784dbfb7416525222e6ab20	Bacteria
6fa8ced4cb1765617169e21dcf17a7eb	Bacteria	Proteobacteria	Alphaproteobacteria	Rickettsiales	Rickettsiaceae
43f8d1ced946461f54ea0b5b7001d5d6	Bacteria	Actinobacteria	Actinobacteria	Actinomycetales	Microbacteriaceae
a63615ad072f1bd5ccd2b976f9f4ff1e	Bacteria	Acidobacteria	Sva0725	Sva0725
db4c2638a991af20508d4bba096b3e86	Bacteria	Chloroflexi	Anaerolineae
58b9be214f4da2b20a836153d014f9d5	Bacteria	Acidobacteria	Acidobacteria-6	iii1-15
3bcd53dd16ed587ab1107e84b335a89a	Bacteria	Proteobacteria	Alphaproteobacteria	Rhizobiales
892e9832d3478002686181f4b0cea815	Bacteria	Actinobacteria	Acidimicrobiia	Acidimicrobiales
fec12509e371e79ba6c32e59055ed75a	Bacteria	Cyanobacteria	Chloroplast
bfea0939d1f0f2540672f484c49e8e96	Bacteria
5622abca6c62c927baed2427fb1f6650	Bacteria	Proteobacteria	Alphaproteobacteria	Rickettsiales
9ef3321ad20cadc72156cab66b72a316	Bacteria	Proteobacteria	Deltaproteobacteria	Desulfuromonadales	Geobacteraceae	Geobacter
6cf01384259a1701a13c6557498a24ec	Bacteria	Bacteroidetes	Sphingobacteriia	Sphingobacteriales
40fa96a2f7fc7b939f5eb0d52d7e5b3c	Bacteria	Proteobacteria	Betaproteobacteria	IS-44
09784c389e1cb7008ba45da7b913851e	Bacteria	Proteobacteria	Alphaproteobacteria	BD7-3
fd3e907759e6ec1831fd216eacdacf4d	Bacteria	Proteobacteria	Alphaproteobacteria	Sphingomonadales	Erythrobacteraceae
d7eb65469eb45a0d002c0255314c9c22	Bacteria	Bacteroidetes	Flavobacteriia	Flavobacteriales
9c6f9d1d33d8327e8dc5e00c3d9a69ad	Bacteria	Proteobacteria	Deltaproteobacteria	Myxococcales
762facf339b485a7d82a2f3fdef5d772	Bacteria	Nitrospirae	Nitrospira	Nitrospirales	Nitrospiraceae	Nitrospira
b8ad21aa3920853ae96430ad555e216d	Bacteria	Bacteroidetes	[Saprospirae]	[Saprospirales]	Saprospiraceae	Saprospira
ec2c7af590612040cedd3a8551fa49e0	Bacteria	Chlamydiae	Chlamydiia	Chlamydiales
c1f02e79ae302282a645e394eea8719b	Bacteria	Proteobacteria	Betaproteobacteria	Burkholderiales	Comamonadaceae
800fab4ca14570f468457ef91a717694	Bacteria	Proteobacteria	Deltaproteobacteria
2da31e61296f678bb466e1ae0593e33d	Bacteria	Planctomycetes	Planctomycetia	Pirellulales	Pirellulaceae
ac230d63edea9a0391933964f09f3e41	Bacteria	Proteobacteria	Gammaproteobacteria
473014d4e7ff420d47a6612995b60f9f	Bacteria	Proteobacteria	Alphaproteobacteria	Rickettsiales
9fa6193b5168ade620b5f09a51e463a4	Bacteria	Proteobacteria	Alphaproteobacteria	Rickettsiales	mitochondria	Pythium	ultimum
08c468a337d238bc58c66027078dbee4	Bacteria	Cyanobacteria	Chloroplast	Stramenopiles
ffaec69347c1784e91a8049c6f3bf5eb	Bacteria	Chloroflexi	SL56
d2eda8eafb3d6774ab7d703bb5fdc023	Bacteria	Proteobacteria	Gammaproteobacteria	Alteromonadales	OM60
16754e060d0b7f7ac8a08754e1a6c7bd	Bacteria	Proteobacteria	Alphaproteobacteria	Rhodobacterales	Rhodobacteraceae
1a92fdf17261a5da47d5ebd39971fada	Bacteria	Proteobacteria	Deltaproteobacteria	Myxococcales
a0ed29caacedb63d450cdf3bbd1a3864	Bacteria	Proteobacteria	Alphaproteobacteria	Rhizobiales	Phyllobacteriaceae
865ae6d4631de8bcb1fefd2bf28c8555	Bacteria	Gemmatimonadetes	Gemm-1
b82d78b5f5ba0b610f9a04c6eb9065fa	Bacteria	Proteobacteria	Alphaproteobacteria	Rhodospirillales
08bdc6c81f6b9daab3d132b54e1d45bc	Bacteria	Actinobacteria	Actinobacteria	Actinomycetales	Nocardiaceae	Rhodococcus
f5fc388c9bb3ff88b6a19cce90590803	Bacteria	Actinobacteria	MB-A2-108	0319-7L14
556d2892f2a8b8847a3247fcb0841b53	Bacteria	Bacteroidetes	Bacteroidia	Bacteroidales
a8224b6247565e74c698e548463b3cd1	Bacteria	Proteobacteria	Alphaproteobacteria	Rhizobiales	Aurantimonadaceae	Aurantimonas
6654bd9f1a514a228dfcaef6013d28eb	Bacteria	Proteobacteria	Alphaproteobacteria	Sphingomonadales	Sphingomonadaceae	Sphingomonas	wittichii
f84a5455a4f6fb3979f21796cdff4da4	Bacteria	Proteobacteria	Alphaproteobacteria	Caulobacterales	Caulobacteraceae
720f64d78f0164a7aa937387f9faf2b4	Bacteria	Chloroflexi	SL56
c72ae89740de69b27a9c1f186ea27377	Bacteria	Verrucomicrobia	Opitutae	Opitutales	Opitutaceae	Opitutus
8eed5182cc89ed9ef2a1ab886d8e0070	Bacteria	Proteobacteria	Alphaproteobacteria	Rickettsiales	mitochondria
78b7ac98c7f188d863ae007fab0fd389	Bacteria	Cyanobacteria	Chloroplast	Stramenopiles
0e9117749e4d5b37df4fe678490445fc	Bacteria
890753fe38fcb22a3042e57041edb808	Bacteria	TM6
21b583c7b7d815dfd99cbce7a56b796d	Bacteria	Proteobacteria	Alphaproteobacteria	Rickettsiales	mitochondria
f888d91bad20670ba7f1eeecfcd31a40	Bacteria	Proteobacteria	Alphaproteobacteria	Rickettsiales	mitochondria
e56bb914617f3fc68b105288f79a2eb4	Bacteria	Cyanobacteria	Chloroplast	Chlorophyta
79c49e189ae707db300cac94c6bf540f	Bacteria	Bacteroidetes	Cytophagia	Cytophagales	Flammeovirgaceae
9a33e27ab678e68adcffeadf645778c5	Bacteria	Proteobacteria	Alphaproteobacteria	Rhodobacterales	Rhodobacteraceae	Octadecabacter
ce72168fbf5e3e014ce3bb524e664041	Bacteria	Proteobacteria	Alphaproteobacteria	Rhizobiales	Aurantimonadaceae
ac826c4a947a02b279867002cf83d56d	Bacteria	Proteobacteria	Alphaproteobacteria	Rickettsiales	mitochondria
918ea954339d229e66f7116d095dce2c	Bacteria	Proteobacteria
e5a24a227b11359b23ee950caa1ac776	Bacteria	Bacteroidetes	Flavobacteriia	Flavobacteriales	Cryomorphaceae
6945d94103ada823c2811f2b81c56ba0	Bacteria	Proteobacteria	Alphaproteobacteria	Rhodobacterales	Rhodobacteraceae	Rhodobacter
90db6d233a33b6db59e3a8cb3b9b0120	Bacteria	Planctomycetes	Planctomycetia	Planctomycetales	Planctomycetaceae	Planctomyces
0969bc99ad073cd087e0857e57c20c18	Bacteria	Proteobacteria	Gammaproteobacteria	Legionellales	Coxiellaceae
4cb756ec0ea24abc1c6fb0551378566e	Bacteria	Proteobacteria	Deltaproteobacteria
2bd75e53d48ac996a3774448d28745bb	Bacteria	Actinobacteria	Acidimicrobiia	Acidimicrobiales
89f1ecc993ca206daba83844424f35aa	Bacteria	Proteobacteria	Betaproteobacteria
8ef2dc359f5b2023e470a760141492e7	Bacteria	Proteobacteria	Betaproteobacteria	Rhodocyclales	Rhodocyclaceae	Sulfuritalea
32ba6de1a90e72f93e2ed5145741e007	Bacteria
9cf24ad9887eff6ca510f3629e38c25a	Bacteria	Planctomycetes	Planctomycetia	Pirellulales	Pirellulaceae
e5a8a34ac5b27a6516d9d564a646c6c2	Bacteria	Bacteroidetes	Flavobacteriia	Flavobacteriales
ad1a5678434a190d1f53e6b8363bb5b1	Bacteria	Bacteroidetes	Cytophagia	Cytophagales	Cytophagaceae
8dad0c1c5161fadae000eb16491dd5b1	Bacteria	Cyanobacteria	Chloroplast	Stramenopiles
2c32110719f7d792854a239ac426a5fd	Bacteria	Proteobacteria	Alphaproteobacteria	Rickettsiales	Rickettsiaceae	Rickettsia
4483f869be0838ec1f160f254d720d7d	Bacteria	Cyanobacteria	Chloroplast	Stramenopiles
876b81ac207219d09733f203834b91b4	Bacteria	Bacteroidetes	[Saprospirae]	[Saprospirales]	Saprospiraceae	Saprospira
ed177737a3371ad479c0e08e3a4bea00	Bacteria	Proteobacteria	Gammaproteobacteria	Xanthomonadales	Xanthomonadaceae
9ce72469885fe81ee26ff6163d7e835d	Bacteria	Proteobacteria	Alphaproteobacteria	Rickettsiales
ec6d7720a567783ce36f5b4cb55ba243	Archaea	Crenarchaeota	Thaumarchaeota	Cenarchaeales	Cenarchaeaceae	Nitrosopumilus
3319b5f314e4f6ed69baba36d826fdde	Bacteria	Proteobacteria	Alphaproteobacteria	Rhodospirillales	Rhodospirillaceae
186d0654d798385d8eb82958f4d049d3	Bacteria	Cyanobacteria	Chloroplast	Chlorophyta
4e9c34253aea88c40ae66daf9db12221	Bacteria	Proteobacteria	Deltaproteobacteria	Bdellovibrionales	Bacteriovoracaceae	Peredibacter	starrii
ebd5144c34cae7bbc09285631d8188f1	Bacteria	Bacteroidetes
da1f16923f026a53418b194806d791a4	Bacteria	Cyanobacteria	4C0d-2	SM2F09
2c4f634407889b0598484538486e4f39	Bacteria	Proteobacteria	Betaproteobacteria	Burkholderiales
5b9a650710e7f198e4be4a316a0ddfed	Bacteria	Proteobacteria	Alphaproteobacteria	Rhodobacterales	Hyphomonadaceae	Hyphomonas
61d96b86c674ec6276984c9be7a81efc	Bacteria	Proteobacteria	Alphaproteobacteria	Sphingomonadales	Sphingomonadaceae	Novosphingobium
2f00d0f988d61ee8862a84ac7bb82b55	Bacteria	Proteobacteria	Alphaproteobacteria	Rickettsiales
088bc2e5228101932e94ad30c2f7b3ec	Bacteria	Cyanobacteria	Chloroplast	Chlorophyta
57c5ddf2c3e4ab7ef19f3aace20a0cf5	Bacteria	Proteobacteria	Alphaproteobacteria	Rickettsiales	mitochondria
26c8b60072b16c06c645529e4f838e9f	Bacteria	Bacteroidetes	Sphingobacteriia	Sphingobacteriales
070fc272903ae7ea02e3a26448029004	Bacteria	Acidobacteria	Holophagae	Holophagales	Holophagaceae	Geothrix
0a614db7734bed5fcde820a51fbae094	Bacteria	Cyanobacteria	Synechococcophycideae	Synechococcales	Synechococcaceae	Synechococcus
2d01d04d66396d050d5b6d252a43531d	Bacteria	Planctomycetes	Planctomycetia	Gemmatales	Gemmataceae
7867e91f25046facbfb2a4b80f71d200	Bacteria	Acidobacteria	Solibacteres	Solibacterales
a1e8fa809b56df27637499c27b93fc46	Bacteria	Actinobacteria	Actinobacteria	Actinomycetales	Geodermatophilaceae	Modestobacter
47b044e0190a4ae1e85d51a971527e1f	Bacteria	Proteobacteria	Alphaproteobacteria	Rhizobiales	Hyphomicrobiaceae
de62ce36cc9535898769812313168bca	Bacteria	Acidobacteria	Acidobacteriia	Acidobacteriales	Acidobacteriaceae
9785251a62c6a93e91793642068bdf66	Bacteria	Acidobacteria	Acidobacteria-6	CCU21
5d2c9965718d1254c00a642f570eb604	Bacteria	Proteobacteria	Deltaproteobacteria	Myxococcales	OM27
ac8875b881d40ba97fea78ed76b19171	Bacteria	Proteobacteria	Alphaproteobacteria	Rhodospirillales	Rhodospirillaceae
71bcdc484096ad3cc79612519c3285c6	Bacteria	Bacteroidetes	Flavobacteriia	Flavobacteriales
0eb614e2451c8e46b20c2543a31a3c5e	Bacteria	Proteobacteria	Gammaproteobacteria	Xanthomonadales	Sinobacteraceae	Steroidobacter
849b0d6a65ddb6493cf5bbf1e320e25e	Bacteria
a5b9c91cd57937870aeb2c4aa0a10f21	Bacteria	Proteobacteria	Gammaproteobacteria	Legionellales	Coxiellaceae
3d49fcdd3c81d71847ae6539731de560	Bacteria	Cyanobacteria	Chloroplast	Chlorophyta
38eb18bdb8fc24ba2666bc99f04719ba	Bacteria	Proteobacteria	Betaproteobacteria	Burkholderiales	Comamonadaceae
1ac5ffb8ab7695bbf0d53d5b670b291b	Bacteria	Proteobacteria	Gammaproteobacteria	Chromatiales
0b973aa57c7bdce18f3ea59405fe0d73	Bacteria	Proteobacteria	Betaproteobacteria
6a73ff6da66246b05ba9821293a224a0	Bacteria	Acidobacteria	[Chloracidobacteria]	RB41	Ellin6075
12843593fb0df551e683b8c8a4ce6531	Bacteria	Bacteroidetes	Cytophagia	Cytophagales	Flammeovirgaceae
b3ec5bb8feef18d17028da683f6cb1cb	Bacteria	Proteobacteria	Deltaproteobacteria	Sva0853	JTB36
63543c460c52a2c95dbfcabcf59457e5	Bacteria	Verrucomicrobia	Verrucomicrobiae	Verrucomicrobiales	Verrucomicrobiaceae
401737046ef9a02d23fc8fef9b37ab84	Bacteria	Chlamydiae	Chlamydiia	Chlamydiales
87bab316a549839ca18d38a885d46a13	Bacteria	Proteobacteria	Alphaproteobacteria	Rickettsiales	mitochondria
42f9a719a6a351c76723d5c870cf4e09	Bacteria	Verrucomicrobia	Verrucomicrobiae	Verrucomicrobiales	Verrucomicrobiaceae	Luteolibacter
b18f1f84920beb1f900033dc1c693d65	Bacteria	OD1	ZB2
1e6654f887bae772df119fbc75958b8f	Bacteria	Bacteroidetes	[Saprospirae]	[Saprospirales]	Chitinophagaceae
309ce21a343e2e4ccb11b441b93ef17f	Bacteria	Gemmatimonadetes	Gemmatimonadetes	KD8-87
b05de1c33dd8ab164fdccddd170a0560	Bacteria	Proteobacteria	Deltaproteobacteria	Spirobacillales
e4304c9496921fcf8a88c1ef30dfd0eb	Bacteria	Proteobacteria	Alphaproteobacteria	Sphingomonadales	Erythrobacteraceae	Erythrobacter
b8cd22e81b4cfb2c2a2ee02bca88492f	Bacteria	Proteobacteria	Betaproteobacteria	Rhodocyclales	Rhodocyclaceae	Sulfuritalea
b9ed3b466563cb6b64bd9a2b86bb20e9	Bacteria	Bacteroidetes	[Saprospirae]	[Saprospirales]	Saprospiraceae
cbba34799497be98a39395794340fc6a	Bacteria	Chlamydiae	Chlamydiia	Chlamydiales
5ccdc3c4f52d65912ffd3afb34b4fe26	Bacteria	Proteobacteria	Gammaproteobacteria	Legionellales	Legionellaceae	Legionella
0cd8acaf21d7292540e4c9e84cb40e6b	Bacteria	Bacteroidetes	Sphingobacteriia	Sphingobacteriales
92c76bea3e6b4c9dfb510226e54815fb	Bacteria	Bacteroidetes
dfb0757e032a5b93e20f9dce17c62a3e	Bacteria	Bacteroidetes	Flavobacteriia	Flavobacteriales
8b91e95fc7649cbb43ecf979740fd816	Bacteria	Proteobacteria	Betaproteobacteria	Procabacteriales	Procabacteriaceae
92d3eb99a9f086d659e5683dd52dd0d1	Bacteria	Cyanobacteria	Chloroplast	Haptophyceae
e2b58e4fe453a8e5b26795a775c3a713	Bacteria	Proteobacteria	Alphaproteobacteria	Rickettsiales	mitochondria
40839b1d3d50c55fd3302f1a520b1984	Bacteria	Proteobacteria	Betaproteobacteria	Burkholderiales	Oxalobacteraceae	Herminiimonas
b965243d7f12d471bae431c2f4184d6b	Bacteria	Proteobacteria	Deltaproteobacteria	Myxococcales	OM27
8a8895d160b2fda424ad5446e9bf8f4e	Bacteria	Firmicutes	Clostridia	Clostridiales	Peptococcaceae	Desulfosporosinus	meridiei
dd675320dd3d457b3e271d13b4a60dcf	Bacteria	Proteobacteria	Alphaproteobacteria	Rickettsiales	mitochondria
32181b006051d0c53a829c211710b508	Bacteria	Proteobacteria	Betaproteobacteria	Burkholderiales
6ebbc25491053ea76666ce2cc074fc3e	Bacteria
c01d4a999753cd0e4f0e185ce838fa4a	Bacteria	Proteobacteria	Alphaproteobacteria	Rickettsiales	mitochondria
b1784514a68399b897146cf688f3c22d	Bacteria	Proteobacteria	Alphaproteobacteria	Rickettsiales
a5b5dbcca99ca3ba17b44d4026501eea	Bacteria	OD1
47b21eb962cf4d9fdefec484c7c45aec	Bacteria	Actinobacteria	Acidimicrobiia	Acidimicrobiales	EB1017
92bb3dd6d26104536193e526e1ca38da	Bacteria	Bacteroidetes	[Saprospirae]	[Saprospirales]
5aa06271cda61e50c94de3eb995f00b9	Bacteria	Proteobacteria	Gammaproteobacteria	Alteromonadales	Alteromonadaceae
99a6ff7d9d475d02f0c2f93c46ae765e	Bacteria	Proteobacteria	Deltaproteobacteria	Spirobacillales
306d6eec212185710bef284b13a0e997	Bacteria	Proteobacteria	Betaproteobacteria
edc21c81d006f606ea024552d60526ac	Bacteria	Proteobacteria	Betaproteobacteria	MND1
301ca05e6677d58e8e5d62e9028e7131	Bacteria	Proteobacteria	Alphaproteobacteria	Sphingomonadales
dc17a99d06059905b9fe7239b0b6072a	Bacteria	Planctomycetes	Planctomycetia	Gemmatales	Gemmataceae
570d8814b3ec9bdebcddb166aac22f06	Bacteria	Proteobacteria	Deltaproteobacteria	Bdellovibrionales	Bacteriovoracaceae
f174710e39f2bc85585ff6abcca3bb8d	Bacteria	Proteobacteria	Gammaproteobacteria	Legionellales
ff596e25490a25a29dab024f137de54d	Bacteria	Proteobacteria	Gammaproteobacteria	HTCC2188	HTCC2089
0bf55614093f148c13c1ee118c0daf0c	Bacteria	Proteobacteria	Gammaproteobacteria	Oceanospirillales	Saccharospirillaceae
ab707e337730a5692b7b3ee9322d6ea1	Bacteria	Proteobacteria	Gammaproteobacteria	[Marinicellales]	[Marinicellaceae]
eec0aaed4fd4ad45bc2a6e611d30047b	Bacteria	Actinobacteria	Acidimicrobiia	Acidimicrobiales
36e7c37c4525fca54ea0202f2382d995	Bacteria	Proteobacteria	Alphaproteobacteria	Rickettsiales
08ef88d441539434a8c1d377cf9670b8	Bacteria	Proteobacteria	Alphaproteobacteria	Sphingomonadales
279d14ec944b0dbd3dadce663353b028	Bacteria	Proteobacteria	Deltaproteobacteria
7fc0ce0be4f56c3472daebd134a2abf7	Bacteria	Bacteroidetes	Sphingobacteriia	Sphingobacteriales
8e1b760d3b5601514264d1ed406eb693	Bacteria	Proteobacteria	Gammaproteobacteria	Legionellales	Coxiellaceae	Aquicella
cb63d14a1996b7e6436643e034231939	Bacteria	Proteobacteria	Alphaproteobacteria	Rhodospirillales	Acetobacteraceae
b674a1eaef6c2e57abc4304d24dd5948	Bacteria	Bacteroidetes	Flavobacteriia	Flavobacteriales	Cryomorphaceae	Fluviicola
156b17643f8da261e1220bc51e6c3b26	Bacteria	Proteobacteria	Betaproteobacteria	Burkholderiales	Burkholderiaceae
8da648919aa2af8037650e06ab35849e	Bacteria	Cyanobacteria	Chloroplast	Stramenopiles
acd8c84742f4192addd7ec40827b4506	Bacteria	Proteobacteria	Alphaproteobacteria	Rhizobiales	Hyphomicrobiaceae	Rhodoplanes
d9fada36ba52a8d5a42106b08d4354c0	Bacteria	Chlamydiae	Chlamydiia	Chlamydiales	Rhabdochlamydiaceae	CandidatusRhabdochlamydia
1ef09e0f9fd2dc4eb876af0d3b453c57	Bacteria	Proteobacteria	Deltaproteobacteria	Spirobacillales
8a59efbf4b0608c3604eed13b9593142	Bacteria	Proteobacteria	Gammaproteobacteria	Legionellales	Coxiellaceae
4ea907f1ee2b2c119ced3414b8eb8396	Bacteria	Proteobacteria	Gammaproteobacteria	Chromatiales
c67fa1e9d3e2c645133df3977cec83c1	Bacteria	Acidobacteria	Acidobacteria-6	BPC015
2bc6b13ef6a2cef2b40e748afa53b813	Bacteria	OP3	BD4-9
d0899992f60808f2fef9f1ca53df899d	Bacteria	Gemmatimonadetes	Gemm-2
3ece7d1ce7d4b0942ae7eba7f3cf1903	Bacteria	Proteobacteria	Alphaproteobacteria	Rickettsiales
30d64ffa1204046993838d9681f3b416	Bacteria	Verrucomicrobia	Opitutae
bb503d3199a1c1954772cb7ff61f00f6	Bacteria	Proteobacteria	Alphaproteobacteria	Rickettsiales
e8e135298bdc3984e7752cfa88df74e7	Bacteria	Cyanobacteria	Chloroplast	Stramenopiles
8fcccc1c1e1e5e8980e6cbff26f6432c	Bacteria	Proteobacteria	Alphaproteobacteria	Sphingomonadales	Sphingomonadaceae	Novosphingobium
4606e5a8b45cd256c0e043c41198e57e	Bacteria	Actinobacteria	Acidimicrobiia	Acidimicrobiales	koll13
7bc70d3a6e756853350b0b6a3f59848d	Bacteria	OP3	BD4-9
cb18c549f989b7f6ab08ed416698beb0	Bacteria
16264f57467997c722ac84dcaae565a3	Bacteria	OD1
48db1f196c5ec6b68bf2ad42bc849769	Bacteria	Proteobacteria	Gammaproteobacteria	Legionellales
355cfbd49b27a4bb84d54f98aa1905c0	Bacteria	Proteobacteria
ae97a7cdcb030bd931696acd8d5df2db	Bacteria	Proteobacteria	Betaproteobacteria	Burkholderiales	Oxalobacteraceae
b0bd50e5e9c8472f08a66999e93a48d9	Bacteria	Proteobacteria	Deltaproteobacteria
bd54cfb7422d8948a39b8a8e359901fd	Bacteria	Proteobacteria	Deltaproteobacteria	Desulfobacterales	Desulfobulbaceae
49489b8412e4735b780aecda6e2c9fa1	Bacteria	Proteobacteria	Alphaproteobacteria	Rickettsiales	mitochondria
65c914641b6484f56b9325fbb2e63ce7	Bacteria	Planctomycetes	Planctomycetia	Pirellulales	Pirellulaceae
cce2a68033a6689230b963cc96a9530c	Bacteria	Bacteroidetes	Flavobacteriia	Flavobacteriales
c8df37785236d9856bbf3dceac097be6	Bacteria	Proteobacteria	Deltaproteobacteria	Desulfuromonadales	Geobacteraceae	Geobacter
bd56dc01bd297a6b260efb46e3ee1806	Bacteria	Actinobacteria	Actinobacteria	Actinomycetales
752618de8c655033b311788feb2afa4e	Bacteria	Planctomycetes	Planctomycetia	Pirellulales	Pirellulaceae	A17
7c91eba752f2423ffc615aed18342744	Bacteria	Proteobacteria	Gammaproteobacteria	[Marinicellales]	[Marinicellaceae]
1d379cd10d0141a4cbdc5d169d25d847	Bacteria	Proteobacteria	Deltaproteobacteria	Desulfuromonadales	Desulfuromonadaceae	Geopsychrobacter	electrodiphilus
ba6759f631da7f1e396aa9d559da00f9	Bacteria	Verrucomicrobia	Opitutae	Opitutales	Opitutaceae	Opitutus
33adddf40d4b173202ce8070166dac4a	Bacteria	Firmicutes	Bacilli	Bacillales	Paenibacillaceae	Brevibacillus
6a7c3ab4e8ff002fe14491a79f839536	Bacteria	TM7	SC3
4efcf059dd4624bc3296c84c0756b749	Bacteria	Proteobacteria	Alphaproteobacteria	Rickettsiales	mitochondria
a7215022a361f1aecf7c1f98c3653902	Bacteria	Proteobacteria	Deltaproteobacteria	MIZ46
5722b8a8df241260daca18251ec9e853	Bacteria	Proteobacteria	Betaproteobacteria
02b5977c21ceffcbe7f5263d650b933d	Bacteria	Proteobacteria	Deltaproteobacteria	Bdellovibrionales	Bacteriovoracaceae
ea0a0ead04c6957a36da07d0dea2dca1	Bacteria	Proteobacteria	Alphaproteobacteria	Rickettsiales
5580f3772d40d551c93350308204f10f	Bacteria	Proteobacteria	Gammaproteobacteria	Oceanospirillales	Oleiphilaceae
3d17bfd8b300570cc88874e52f6fb63f	Bacteria	Proteobacteria	Alphaproteobacteria	Rhodobacterales	Rhodobacteraceae	Amaricoccus
ca6c2b3b469c08212142e8821c65882a	Bacteria	Proteobacteria	Betaproteobacteria	Burkholderiales	Oxalobacteraceae	Janthinobacterium
fe768443c9b0ee4e2b95d85eb68db3ae	Bacteria	Proteobacteria	Alphaproteobacteria	Sphingomonadales
4a57f4d105e888560b56093316510c9c	Bacteria	Planctomycetes	vadinHA49	DH61
ceb7960ef4a99cbdd96604c6d6254a76	Bacteria	Acidobacteria	RB25
19ebf8fc76849cd406bf13dcfca70fa1	Bacteria	Bacteroidetes	Sphingobacteriia	Sphingobacteriales
ca8df77d95337d048d425cd6d2002444	Bacteria	Bacteroidetes	[Saprospirae]	[Saprospirales]	Chitinophagaceae
38b5e7e22e1b9b0e026240c9f40d9b3e	Bacteria	Chlamydiae	Chlamydiia	Chlamydiales
0e4cad379666cbaed3deef593cd41d55	Bacteria	Proteobacteria	Gammaproteobacteria	Legionellales	Legionellaceae
e98465c4c0b9ee88ab0cb46f5ee40523	Bacteria	Bacteroidetes	Flavobacteriia	Flavobacteriales	Flavobacteriaceae	Flavobacterium
e8ff036989b9003977bb99a178e3f309	Bacteria	Chlamydiae	Chlamydiia	Chlamydiales	Rhabdochlamydiaceae	CandidatusRhabdochlamydia
3d075260fe5b468fed63154a1080f15c	Bacteria	Bacteroidetes	Cytophagia	Cytophagales	Flammeovirgaceae	Flexibacter
8c4c999c1b37d6925f4e45a5b98472e4	Bacteria	Bacteroidetes	Bacteroidia	Bacteroidales
0de2767a3e50ecef68a9e2422836ba0c	Bacteria	Proteobacteria	Alphaproteobacteria	Rickettsiales	mitochondria
f983e30ff9f8a213f8ad1a99212d94be	Bacteria	Actinobacteria	Acidimicrobiia	Acidimicrobiales	C111
69e246e02e661768bf784bb8798f5ad4	Bacteria	Proteobacteria	Gammaproteobacteria	Legionellales	Coxiellaceae	Aquicella
29254eec7349e5fc07b1931919e19d1a	Bacteria	Chlamydiae	Chlamydiia	Chlamydiales
1878c877726ea800913b57df800be272	Bacteria	Nitrospirae	Nitrospira	Nitrospirales	Nitrospiraceae	Nitrospira
72ef7c7b728d294c29f0d2dbc4ba4dab	Bacteria	Acidobacteria	[Chloracidobacteria]	RB41	Ellin6075
ead26be4a0163584b095189733c03d44	Bacteria	Proteobacteria	Alphaproteobacteria	Rhodospirillales	Acetobacteraceae
45bc4b1f7e3dd1333df677fd3e370f61	Bacteria	Proteobacteria	Gammaproteobacteria	Legionellales	Coxiellaceae
8bc601dcb7b65c470ddf1ad2d2842fe2	Bacteria	Proteobacteria	Betaproteobacteria	Burkholderiales	Oxalobacteraceae	Herminiimonas
9081d07933e02e7c60eabed5e45b6873	Bacteria	Proteobacteria	Gammaproteobacteria	Thiotrichales	Piscirickettsiaceae
226147a8ae79bc352f677d21f2d12431	Bacteria	Proteobacteria	Deltaproteobacteria	MIZ46
69fceb31f02e166779b531dadb9b71c1	Bacteria	Proteobacteria	Betaproteobacteria	Procabacteriales	Procabacteriaceae
88cf13bba1da635d18a1d1cedad86082	Bacteria	Proteobacteria	Alphaproteobacteria	Rickettsiales
c76bccd2d3e5b0865a0fe67e1348fcc3	Bacteria	Proteobacteria	Deltaproteobacteria	Desulfuromonadales	Desulfuromonadaceae
3e5cb68356aeac941d25db9cab6a9d3d	Bacteria	Actinobacteria	Actinobacteria	Actinomycetales	Cellulomonadaceae	Demequina
6b4e03645f2bad59dc8cebb9aee76394	Bacteria	Proteobacteria	Alphaproteobacteria	Sphingomonadales	Erythrobacteraceae
06d1ffdc854cf06cc92499e05f90de8a	Bacteria	Bacteroidetes	Cytophagia	Cytophagales	Flammeovirgaceae
0e2098e9ad6f2c074f933979c885f68a	Bacteria	TM6	F38
e1cbc3cee0ba0b586ff885b119451b1a	Bacteria	Chlamydiae	Chlamydiia	Chlamydiales
54f9d45ebe3c73f54132b2f1eb066039	Bacteria	Cyanobacteria	Chloroplast	Stramenopiles
f5dceaa232a9d10abfab64ad8fc14b0a	Bacteria	Proteobacteria	Alphaproteobacteria	Rhodobacterales	Rhodobacteraceae	Rhodobacter
f671cd8eb68392b28f2ea0dfa4cc194b	Bacteria	Proteobacteria	Alphaproteobacteria	Rickettsiales	mitochondria
d4212f58a340965b3f711bd1bdbd28e8	Bacteria	Proteobacteria	Gammaproteobacteria	Legionellales	Coxiellaceae	Rickettsiella
e5584a38336b44ee9c9c098a6a7864a2	Bacteria	Proteobacteria	Betaproteobacteria	Burkholderiales	Alcaligenaceae
53fad28d1b848930e35f2c2ebcc7d4ef	Bacteria	Cyanobacteria	Chloroplast	Stramenopiles
edfd9fe7b9fc7af35fba481211003097	Bacteria	Proteobacteria	Alphaproteobacteria	Rhodospirillales	Acetobacteraceae
3d69e2f84a880e7bf9b2123f9a806acd	Bacteria	Proteobacteria	Alphaproteobacteria	Caulobacterales	Caulobacteraceae
1313b1c9e9a4988c70898ca07f37c7fe	Bacteria	Tenericutes	Mollicutes	Acholeplasmatales	Acholeplasmataceae	Acholeplasma
27d1b866883a2cc4b5749097f6ce3d7e	Bacteria	Bacteroidetes	Cytophagia	Cytophagales	Cytophagaceae	Hymenobacter
39726629611d3912ae41062c03f0cf97	Bacteria	Bacteroidetes	[Saprospirae]	[Saprospirales]	Saprospiraceae
2156b77c163ac6bbc4ea9b72490e8985	Bacteria	Bacteroidetes	Flavobacteriia	Flavobacteriales	Flavobacteriaceae	Polaribacter
6b9141106e764b5efbfa24fdb03b8b79	Bacteria	Bacteroidetes	Cytophagia	Cytophagales	Flammeovirgaceae
2e1969d6a15b6a3ed55240cac89a77f8	Bacteria	Bacteroidetes	[Saprospirae]	[Saprospirales]	Saprospiraceae
162a7d89d905ba12e46574700439b980	Bacteria	Proteobacteria	Alphaproteobacteria	Rickettsiales
5a664d985f3dcc955bb7dcad2a5b91eb	Bacteria	Proteobacteria	Gammaproteobacteria	Alteromonadales	HTCC2188	HTCC
3d482dcb010eacc5fb4c9f0325f2d908	Bacteria	Proteobacteria	Alphaproteobacteria	Rhodospirillales	Rhodospirillaceae
9c998be17149f21bb94bf3bf5130a2a1	Bacteria	Bacteroidetes
e04bf9bca3b5f7fe8bb6e05777338b7e	Bacteria	Chlorobi	Ignavibacteria	Ignavibacteriales	Ignavibacteriaceae
f2eff3a47f180afdd2c546f63588c3b2	Bacteria	Proteobacteria	Alphaproteobacteria	Ellin329
ba80298023386286f71f3c1bfa75ed8a	Bacteria	Proteobacteria	Betaproteobacteria	MND1
22176c6ef2be76fad9e45aa024aaa8ab	Bacteria	Gemmatimonadetes	Gemm-1
c7bcdefe125c80f5a56d1d8f4ac1bdd0	Bacteria	Proteobacteria	Betaproteobacteria	Ellin6067
a5cd27eb78f1b7c414a41baa6655c5d2	Bacteria	Chloroflexi	Ellin6529
011ce27f894fc63df55dcb462941c3f1	Bacteria	Cyanobacteria	Chloroplast	Stramenopiles
6ef30ad70950c7994898405da4aa1f2a	Bacteria	Actinobacteria	Actinobacteria	Actinomycetales	Nocardioidaceae	Aeromicrobium
61ed9644ae561c23f152a3561adaceca	Bacteria	Proteobacteria	Deltaproteobacteria	Desulfuromonadales	Desulfuromonadaceae
1f906f391e9dc1e56e636e4bac62937d	Bacteria	Proteobacteria	Gammaproteobacteria	Thiotrichales	Piscirickettsiaceae
e48f0e109e5ddbaa08a3004c2cf4172b	Bacteria	Proteobacteria	Deltaproteobacteria	Desulfobacterales	Desulfobacteraceae	Desulfococcus
f1e3e754059e7ec0180fb5256253ea82	Bacteria	Proteobacteria	Betaproteobacteria	Hydrogenophilales	Hydrogenophilaceae	Thiobacillus
e98974c14927237cdeee890c86479e3a	Bacteria	Firmicutes	Clostridia	Clostridiales	Peptostreptococcaceae	Proteocatella	sphenisci
29e71c36f2ddedff337716fd2fe8cb96	Bacteria	Cyanobacteria	Chloroplast	Stramenopiles
67204202460e53da77f78e860e415f9c	Bacteria	Chlamydiae	Chlamydiia	Chlamydiales
4aee55505cab8a81806cccbb5aae1a40	Bacteria	Proteobacteria	Alphaproteobacteria	Ellin329
e564a15845c40c47c09a28c00d05e88c	Bacteria	Cyanobacteria	Chloroplast	Stramenopiles
1b1d9576a5390f3660c0ab3b3a241b2c	Bacteria	Actinobacteria	Acidimicrobiia	Acidimicrobiales
f781754964ed145b04b9facac570fc02	Bacteria	Proteobacteria	Alphaproteobacteria	Rickettsiales	mitochondria
d6f2b3ca8202cecaa473d2b4ce596340	Bacteria	Proteobacteria	Alphaproteobacteria	Rhizobiales
d54a397cc3a738a89098c92aea66f12a	Bacteria	Proteobacteria	Alphaproteobacteria
93fbcb9f788e2456c357d7d7ef6211f6	Bacteria	Proteobacteria	Alphaproteobacteria	Rhodobacterales	Rhodobacteraceae
a5f64f6b6dd6888e3f7dc4129bc632a6	Bacteria	Proteobacteria	Gammaproteobacteria	Xanthomonadales	Xanthomonadaceae
25b4497ba35af1ad00af77169cc79f52	Bacteria	Proteobacteria	Gammaproteobacteria	Alteromonadales	Colwelliaceae
0d34e514b2d0d3a14fbfa27a9717f5ae	Bacteria	Bacteroidetes	Sphingobacteriia	Sphingobacteriales	Sphingobacteriaceae	Pedobacter
96eb9db5778d4d5e449cabf4ffce249a	Bacteria	Proteobacteria	Gammaproteobacteria	Legionellales
ea10779926d7122165089fecfe5eabd3	Bacteria	Proteobacteria	Alphaproteobacteria	Rhizobiales	Phyllobacteriaceae
[truncated: 2,497 more rows]

## Sheet: Coordinates
x	y	sample
22.06777778	64.71333333	A13
23.24361111	65.1666666	A5
19.81722222	63.5	B3
18.55888888	63.0	C14
18.23333333	61.18361111	C24
18.95388888	62.65444444	C3
18.27055555	62.87333333	GA1
22.38111111	65.81222222	RA1
22.4552777	65.73916666	RA2

## Sheet: Nanopore 33 cycles EMU species
	A13_33	A5_33	B3_33	Blank_33	C14_33	C24_33	C3_33	GA1_33	RA1_33	RA2_33
Acaryochloris marina	0	0.000456149	0.000320131	0	0.00109044	0.0019236	0.00107321	0.000824234	0	0
Achromobacter denitrificans	0	0.000772011	0.000773729	0	0	0	0	0.000613947	0.00047873	0.00104956
Achromobacter insolitus	0.000930392	0.00294254	0.00217591	0	0.000763358	0.000486771	0.000471479	0.000847503	0.00169562	0.00223139
Achromobacter panacis	0.00550645	0.0168955	0.027569	0	0.00876111	0.0054971	0.00800615	0.0142081	0.01358	0.0174903
Achromobacter sp. AONIH1	0	0.000482387	0.000838191	0	0.000323674	0	0	0.000452297	0.000381482	0
Achromobacter spanius	0	0	0.000442582	0	0	0	0	0	0	0
Achromobacter xylosoxidans	0	0.000854234	0.000831114	0	0	0.000307191	0.000387588	0.000373732	0.000695195	0.00110049
Acidihalobacter prosperus	0.000317709	0	0	0	0	0	0	0	0	0
Acidimicrobium ferrooxidans	0.00145621	0.00158563	0.000709398	0	0.000605088	0.000624074	0.000353197	0.000689361	0.000519663	0.000962017
Aciditerrimonas ferrireducens	0.0222071	0.0208414	0.00985106	0.0322581	0.00919796	0.00676114	0.0069703	0.0103669	0.00528241	0.00433472
Acidothermus cellulolyticus	0.00111195	0.00131042	0.00215975	0	0.00510823	0.00430347	0.00362712	0.00466449	0.00059733	0.000757782
Acidovorax carolinensis	0.000674315	0.000893821	0	0	0	0	0	0	0.00170623	0.000599213
Acidovorax radicis	0	0.000438418	0.00036705	0	0	0	0	0	0.000491143	0.000455313
Acidovorax sp. KKS102	0	0.000243526	0.000499718	0	0	0	0	0	0.000418975	0
Acidovorax sp. RAC01	0	0.000450563	0.000463906	0	0	0	0	0	0.000644959	0.000491463
Acidovorax sp. T1	0	0.000271071	0	0	0	0	0	0	0	0
Actinoalloteichus hymeniacidonis	0	0	0	0	0	0	0.000286455	0	0	0
Actinobacteria bacterium IMCC19121	0.0431703	0.0278068	0.0456381	0	0.0158077	0.0228444	0.0281678	0.0384779	0.052003	0.0339019
Actinobacteria bacterium IMCC25003	0.00479738	0.00240416	0.0060147	0	0.00234602	0.00386103	0.00345165	0.00604335	0.0224549	0.00856754
Actinobacteria bacterium IMCC26077	0.0102229	0.00753921	0.00460798	0	0.00367735	0.00458636	0.00566506	0.00636538	0.00356499	0.0038939
Actinobacteria bacterium IMCC26103	0.00919004	0.006719	0.00651837	0	0.00352922	0.00447721	0.0054788	0.00752868	0.0141846	0.00731198
Actinobacteria bacterium IMCC26256	0.00968149	0.0117749	0.00530466	0	0.00640003	0.00491988	0.00465477	0.00745069	0.00252838	0.00885498
Actinoplanes hulinensis	0	0.000503644	0	0	0.000417163	0	0	0.000484265	0	0
Actinoplanes ianthinogenes	0	0	0	0	0.00048292	0.000832072	0.000582044	0.000804649	0	0
Actinoplanes missouriensis	0.000664777	0.00051685	0.000587347	0	0.00131358	0.000817876	0.000946228	0.00102738	0	0
Actinoplanes sp. OR16	0.000416723	0.000433885	0.000415394	0	0.000705468	0.000791642	0.000644905	0.00117654	0	0
Actinoplanes sp. SE50	0.00103205	0.00109302	0.00109739	0	0.000689652	0	0.000339762	0.000532344	0	0
Actinoplanes sp. SE50/110	0	0	0	0	0	0	0.00047329	0.000467536	0	0
Actinotalea fermentans	0	0	0	0	0.000694676	0.000640644	0.000577795	0.000440867	0	0
Actinotalea ferrariae	0	0	0	0	0.000373332	0.000461903	0.000252274	0.000436416	0	0
Adhaeribacter terrae	0	0	0	0	0	0.000366384	0	0	0	0
Adhaeribacter terreus	0	0	0.000882426	0	0	0.000475005	0	0	0	0
Advenella mimigardefordensis	0	0.000341553	0	0	0	0	0	0	0	0
Aequorivita sublithincola	0.00368681	0.00119907	0.00263089	0	0	0.00186821	0.00063864	0	0	0
Aequorivita viscosa	0.00145094	0.000510219	0.0012738	0	0	0.000552428	0.000349883	0	0	0
Aestuariibaculum suncheonense	0.000415912	0	0	0	0	0	0	0	0	0
Akkermansia glycaniphila	0	0	0	0	0.00027516	0	0.000384739	0	0	0
Akkermansia muciniphila	0.000516242	0.000592653	0.000777426	0	0.00202949	0.00113771	0.00132886	0.00187242	0	0.000886304
Alcaligenaceae bacterium SJ-26	0	0.000661376	0.000450422	0	0.000370528	0	0	0.000381858	0	0
Alcaligenes faecalis	0	0.000419844	0	0	0	0	0	0	0	0
Algibacter psychrophilus	0.000777442	0.000562755	0.000860934	0	0	0	0	0	0	0
Algisphaera agarilytica	0.000326518	0.000402688	0	0	0	0	0	0	0	0.00113968
Algoriphagus aquatilis	0.00485687	0.00440445	0.0156614	0	0.000621048	0.00392659	0.000998099	0	0.00202024	0.00829993
Algoriphagus litoralis	0	0.000348115	0.000477156	0	0	0	0	0	0	0
Algoriphagus marinus	0	0.00147128	0.000950632	0	0	0	0	0	0	0.00100512
Algoriphagus olei	0	0.000432035	0.000556214	0	0	0	0	0	0	0
Algoriphagus sanaruensis	0.00223726	0.00219903	0.00551285	0	0	0.000692955	0.000281966	0	0.000640461	0.00189493
Algoriphagus taiwanensis	0	0.000274504	0.000771507	0	0	0	0	0	0	0
Aliterella antarctica	0.000817305	0.00127927	0.000481626	0	0.00144686	0.00215746	0.00152087	0.00127336	0	0
[truncated: 650 more rows]

## Sheet: Nanopore 33 cycles EMU genus
	A13_33	A5_33	B3_33	Blank_33	C14_33	C24_33	C3_33	GA1_33	RA1_33	RA2_33
[truncated: 346 more rows]
