# Supplementary material for: Association between Legionella species and humic substances during early summer in the northern Baltic Sea
Source: Frontiers journal article supplement (doi:10.3389/fmars.2022.1070341), 2023-01-23
Supplement: Data_Sheet_3.xlsx [file Data_Sheet_3.xlsx]

## Sheet: Environmental data
Description	Sample_ID	Station	Grouping	Location	Seccidepth..m.	Temperature..ºC.	Salinity..psu.	pH	Total.N...M.	Total.P...M.	DOC...M.	Humus...g.l.	BactGrowth.µg.C.dm..3.day..1.	Chl.a..mg.m..3..mean
18S-A13	A13	A13	Offshore_North	North	4.5	5.772	2.917	7.94	17.21	0.18	348	14.8	3.12	3.365
18S-A5	A5	A5	Offshore_North	North	3.5	7.256	2.679		19.28	0.28	398	19.1	3.24	2.945
18S-B3	B3	Örefjärden	Coast_South	South	2.5	9.729	3.896	8.03	16.71	0.41	425	22.2	9.48	3.445
18S-Blank	Blank	Blank	NA	NA	NA	NA	NA	NA	NA	NA	NA	NA	NA	NA
18S-C14	C14	C14	Coast_South	South	4.5	8.934	4.933		14.28	0.26	333	10.3	4.92	2.56
18S-C24	C24	C24	Offshore_South	South	5.5	9.905	5.259	8.3	16.63	0.32	338	8.4	5.64	1.69
18S-C3	C3	C3	Offshore_South	South	6	9.036	5.122	8.31	14.99	0.3	326	9.3	3	2.085
18S-F01F02	Filterblank	Filterblank	NA	NA	NA	NA	NA	NA	NA	NA	NA	NA	NA	NA
18S-GA1	GA1	Gavik	Coast_South	South	6.5	6.785	5.014	8.24	14.99	0.29	329	10.5	3.84	1.99
18S-PK10	PK10	Poscont	NA	NA	NA	NA	NA	NA	NA	NA	NA	NA	NA	NA
18S-PK8	PK8	Poscont	NA	NA	NA	NA	NA	NA	NA	NA	NA	NA	NA	NA
18S-PK9	PK9	Poscont	NA	NA	NA	NA	NA	NA	NA	NA	NA	NA	NA	NA
18S-RA1	RA1	Råneå1	Coast_North	North	1	14.84	0.515	7.25	23.42	0.41	637	51.5	16.2	3.52
18S-RA2	RA2	Råneå2	Coast_North	North	2	12.617	1.599	7.62	19.42	0.26	458	29.3	11.16	2.66

## Sheet: Illumina - Feature table
18S forward sequence	A13	A5	Blank	C14	C24	C3	Filterblank	Gavik	Poscont	Poscont	Poscont	Råneå1	Råneå2	Örefjärden
AAAACTTACCAGGTCAAGACATGGGCGTGATTGACAGGCTAATGACTTTTCTCGATTCCATGGATGGTGGTGCATGGTCGCACTTAGTTGGTGCAGTGATTTGTCAGGTTTATTCCGGTAACGAACGAGACCTCGGCCTTGTAAATAGCTATGCTGCTTACAGGGACATTGGCGGCTACGCCAAGGAAGCTCGAGGCAATTGCAGATCTGGAATGCCCTTAGATGTCCTGGGTCGCACGCGTGCTACAATGACGCCACGAACGAGCTTGCATGATGAAAGTTATGCATAA	0	0	0	1822	2741	1592	0	2635	0	0	0	0	0	615
AAATCTCACCAGGCCCGGACACCAGAAGGATTGACAGATTGATAGCTCTTTCTTGATTTGGTGGGTGGTGGTGCATGGCCGTTCTTAGTTGGTGGAGTGATTTGTCTGGTTAATTCCGATAACGAACGAGACTCTGTCCTGTTAAATAGATCCAACCTAGTCGTAGGGTTGGAATTTCTTCTTAGAGGGACTGGTGATTATTAGTCACACGAGATTGAGCAATAACAGGTCTGTGATGCCCTTAGATGTTCTTGGCCGCACACGCGCTACACTGAAGTGATCAGCTAGTT	1277	0	0	1723	16	1019	0	462	0	0	0	3795	37	0
GAAACTTACCAGGTCCAGACATAGTAAGGATTGACAGATTGATAGCTCTTTCTTGATTCTATGGGTGGTGGTGCATGGCCGTTCTTAGTTGGTGGAGTGATTTGTCTGGTTAATTCCGTTAACGAACGAGACCTTAACCTGCTAAATAGTTACATGTAACCTCGGTTACATGGGCAACTTCTTAGAGGGACTTTGCGTGTCTAACGCAAGGAAGTTTGAGGCAATAACAGGTCTGTGATGCCCTTAGATGTCCTGGGCTGCACGCGCGCTACACTGATGCGCTCAACGAG	2388	1546	0	0	0	0	0	0	567	558	572	0	0	171
AAAACTTACCAGGTCAAGACATGGGCGTGATTGACAGGCTAATGACTTTTCTCGATTCCATGGATGGTGGTGCATGGTCGCACTTAGTTGGTGCAGTGATTTGTCAGGTTTATTCCGGTAACGAACGAGACCTCGGCCTTGTAAATAGCTATGCTGCTTACAGGGACATTGGCGGCTACGCCAAGGAAGCTCGAGGCAATTGCAGATCTGGAATGCCCTTAGATGTCCTGGGTCGCACGCGTGCTACAATGACGCCACGAACGAGCTTGCGTGATGAAAGTTACGCATAA	1493	217	0	257	200	292	0	676	0	0	0	0	0	1607
AAATCTCACCAGGCCCGGACACCAGAAGGATTGACAGATTGATAGCTCTTTCTTGATTTGGTGGGTGGTGGTGCATGGCCGTTCTTAGTTGGTGGAGTGATTTGTCTGGTTAATTCCGATAACGAACGAGACTCTGTCCTGTTAAATAGATCCAACCTAGTCGTAGGGTTGGAATTTCTTCTTAGAGGGACTGGTGATTATTAGTCACACGAGATTGAGCAATAACAGGTCTGTGATGCCCTTAGATGTTCTGGGCCGCACACGCGCTACACTGAAGTGATCAGCTAGTT	7	422	0	15	1258	9	0	0	0	85	0	49	2730	0
AAAACTTACCAGGTCCAGACATAGTGAGGATTGACAGATTGAGAGTTCTTTCTTGATTCTATGGGTGGTGGTGCATGGCCGTTCTTAGTTGGTGGAGTGATTTGTCTGGTTAATTCCGTTAACGAACGAGACCGCCGCCTGCTAAATAGTTCTACTAATGGTTTTTCATTGGTAAGAGCTTCTTAGAGGGACGTTCATTCTACAAGATGAAGGAAGATGGCGGCAATAACAGGTCTGTGATGCCCTTAGATGTCCTGGGCCGCACGCGCGTTACACTGATGCACTCAACG	0	0	0	0	0	0	0	0	1092	789	837	0	0	0
GAAACTTACCAGGTCCAGACATAGTAAGGATTGACAGATTGATAGCTCTTTCTTGATTCTGTGGGTGGTGGTGCATGGCCGTTCTTAGTTGGTGGAGTGATTTGTCTGGTTAATTCCGTTAACGAACGAGACCTTAGCCTACTAAATAGTCGGTGCAATCATGATTGTACCTACTTCTTAGAGGGACTTTGTAAGCAAATACAAGGAAGTTTGAGGCAATAACAGGTCTGTGATGCCCTTAGATGTCCTGGGCCGCACGCGTGCTACACTGACACATACATCGAGCATCT	0	0	0	0	1143	340	0	0	0	0	0	0	0	251
AAAACTTACCAGGTCCAGACATAGTGAGGATTGACAGATTGAGAGTTCTTTCTTGATTCTATGGGTGGTGGTGCATGGCCGTTCTTAGTTGGTGGAGTGATTTGTCTGGTTAATTCCGTTAACGAACGAGACCGCCGCCTGCTAAATAGACCCGTTAATGGCTTTTCATTGGCGAGGTCTTCTTAGAGGGACGTTCATTCTACAAGATGAAGGAAGATGGCGGCAATAACAGGTCTGTGATGCCCTTAGATGTCCTGGGCCGCACGCGCGTTACACTGATGCACTCAACG	349	0	0	0	60	95	0	402	177	171	0	0	0	448
AAAACTTACCAGGTCAAGACATGGGCGTGATTGACAGGCTAATGACTTTTCTCGATTCCATGGATGGTGGTGCATGGTCGCACTTAGTTGGTGCAGTGATTTGTCAGGTTTATTCCGGTAACGAACGAGACCTCGGCCTTGTAAATAGCTATGCTGCTTACAGGGACATTGGTGGCTACACCAAGGAAGCTCGAGGCAATTGCAGATCTGGAATGCCCTTAGATGTCCTGGGTCGCACGCGTGCTACAATGACGCCACGAACGAGTTTGCGTGATGAAAGTCACGCATAA	0	0	0	299	192	406	0	559	0	0	0	0	0	213
AAATCTCACCAGGCCCGGACACCAGAAGGATTGACAGATTGATAGCTCTTTCTTGATTTGGTGGGTGGTGGTGCATGGCCGTTCTTAGTTGGTGGAGTGATTTGTCTGGTTAATTCCGATAACGAACGAGACTCTGTCCTGCTAAATAGATGCAACCTTTCTTTTGGGTTGCAATTTCTTCTTAGAGGGACTGGCGATTATTAGTCGCACGAGATTGAGCAATAACAGGTCTGTGATGCCCTTAGATGTTCTGGGCCGCACACGCGCTACACTGAATTGATCAGCTAGTT	1415	0	0	0	0	0	0	0	0	0	209	0	0	0
AAAACTTATCAGGTCCAGACATAGTGAGGATTGACAGATTGAGAGCTCTTTCTTGATTCTATGGGTGGTGGTGCATGGCCGTTCTTAGTTGGTGGAGTGATTTGTCTGGTTAATTCCGTTAACGAACGAGACCTCAGCCTGCTAAATAATAGCGTTAATGATTTTCATTGGCGGCTGTTTCTTAGAGGGACATGGAGTATCAAACTCCAGGAAGATTGAGGCAATAACAGGTCTGTGATGCCCTTAGATGTTCTGAACCGCACGCGTGTTACACTGATGTGTTCAACGAG	648	100	0	0	0	0	0	0	108	109	147	0	0	0
AAAACTTACCAGGTCCGGACATAGTGAGGATTGACAGATTGAAGATCTTTCTTGATTCTATGGGTGGTGGTGCATGGCCGTTCTTAGTTGGTGGAGTGATTTGTCTGGTTAATTCCGTTAACGAACGAGACCTCGACCTACTAAATAGTTTTGCGAATTCTTCGGGATTCGTGGAGACTTCTTAGAGGGACTTTGGATGAGTAGTCCAAGGAAGTTCGAGGCAATAACAGGTCTGTGATGCCCTTAGATGTTCTGGGCCGCACGCGCGCTACACTGACTGGTTCATCGAG	0	0	0	143	63	61	0	716	0	0	0	0	0	0
AAAACTTACCAGGTCCAGACATAGCTATGATTGACAGATTGAAGATCTTTCTTAATTCTATGGGTGGTGGTGCATGGCCGTTCTTAGTTGGTGGAGTGATTTGTCTGGTTAATTCCGTTAACGAACGAGACCTCGACCTGCTAAATAGTTTGGCGAATTCCCTGTGGATTCGTACATACTTCTTAGAGGGACTATCGGTTCGCAGCCGGTGGAAGTTCGAGGCAATAACAGGTCTGTGATGCCCTTAGATGTTCTGGGCCGCACGCGCGCTACACTGAGTACTTCATCGA	0	0	0	181	183	62	0	401	0	0	0	0	0	0
AAAACTTACCAGGTCCAGACATAGTGAGGATTGACAGATTGATAGCTCTTTCTTGATTCTATGGGTGGTGGTGCATGGCCGTTCTTAGTTGGTGGAGTGATTTGTCTGGTTAATTCCGTTAACGAACGAGACCTTAGCCTGCTAACTAGTCGCGGCGATCTCGATCGTCGTCGACTTCTTAGAGGGACTTTGTGGCACTAAACACAAGGAAGTTTGAGGCAATAACAGGTCTGTGATGCCCTTAGATGTCCTTGGCCGCACGCGTGCTACACTGACGCCTACAACGAGTA	793	0	0	0	0	0	0	0	0	0	0	0	0	0
AAAACTTACCAGGTCCAGACATAGTTAGGATTGACAGATTGAGAGCTCTTTCTTGATTCTATGGGTGGTGGTGCATGGCCGTTCTTAGTTGGTGGAGTGATTTGTCTGGTTAATTCCGATAACGAACGAGACCTTAACCTGCTAAATAGTAGTCCGATGATTTCTTCATCGTGTCGACTTCTTAGAGGGACTATCGGTGTCTAACCGATGGAAGTTTGAGGCAATAACAGGTCTGTGATGCCCTTAGATGTTCTGGGCCGCACGCGCGCTACACTGATGAATTCAACGAG	0	0	0	0	74	0	0	116	0	247	234	0	0	68
AAAACTTACCAGGTCCAGACATAGGAAGGATTGACAGATTGAGAGCTCTTTCTTGATTCTATGGGTGGTGGTGCATGGCCGTTCTTAGTTGGTGGAGTGATTTGTCTGGTTAATTCCGTTAACGAACGAGACCTTAACCTGCTAAATAGTTACGACGATACTCTGTATCGGCGGACAACTTCTTAGAGGGACTACTGGGGTTACACCCGGTGGAAGTTTGAGGCAATAACAGGTCTGTGATGCCCTTAGATGTTCTGGGCCGCACGCGCGCTACACTGACTGGATCAACG	0	0	0	151	0	0	0	550	0	0	0	0	0	0
GAAACTTACCAGGTCCAGACATAGTGAGGATTGACAGATTGATAGCTCTTTCTTGATTCTATGGGTGGTGGTGCATGGCCGTTCTTAGTTGGTGGAGTGATTTGTCTGGTTAATTCCGTTAACGAACGAGACCTTAGCCTGCTAAATAGTCGCTCCAATCATGATTGGCTGCGACTTCTTAGAGGGACTTTGTAAGCAAATACAAGGAAGTTTGAGGCAATAACAGGTCTGTGATGCCCTTAGATGTCCTGGGCCGCACGCGTGCTACACTGACACATACAGCGAGTATC	689	0	0	0	0	0	0	0	0	0	0	0	0	0
AAATCTCACCCGGCCCGGACACTGTAAGGATTGACAGATTGAGAGCTCTTTCTTGATTCGGTGGGTGGTGGTGCATGGCCGTTCTTAGTTGGTGGAGCGATTTGTCTGGTTAATTCCGATAACGAACGAGACTCTAGCCTGCTAAATAGTACGCCGATCTTTTGTCGGCGCGTACTTCTTAGAGGGACAAGTAGCGGTTAGCTACACGAAATTGAGCAATAACAGGTCTGTGATGCCCTTAGATGTTCGGGGCCGCACGCGCGCTACACTGAAGGGATAAGCGTGTTTTT	0	0	0	56	220	58	0	307	0	0	0	0	0	38
AAAACTTACCAGGTCCAGACATAGTGAGGATTGACAGATTGAGAGCTCTTTCTTGATTCTATGGGTGGTGGTGCATGGCCGTTCTTAGTTGGTGGGTTGCCTTGTCAGGTTGATTCCGGTAACGAACGAGACCTCAGCCTGCTAAATAGTAATACCCGCTTTTTGCGAGTAGCTTACTTCTTAGAGGGACAGATGCTACAAAAGCATCGGAAGTATGAGGCAATAACAGGTCTGTGATGCCCTTAGATGTTCTGGGCCGCACGCGCGCTACACTGACGCATTCAACAAGC	190	32	0	0	0	35	0	166	0	0	35	0	0	187
GAAACTTACCAGGTCCAGACATAGTAAGGATTGACAGATTGAAAGCTCTTTCTTGATTCTATGGGTGGTGGTGCATGGCCGTTCTTAGTTGGTGGAGTGATTTGTCTGGTTAATTCCGTTAACGAACGAGACCTCAGCCTGCTAACTAGATTCGCCAATATGATTGGCGCATCTTCTTAGAGGGACTATTTGTGTTTAATGAATGGAAGTTTGAGGCAATAACAGGTCTGTGATGCCCTTAGATGTTCTGGGCCGCACGCGCGCTACACTGATGAACGCAACGAGACCAC	358	60	0	0	0	0	0	0	0	0	0	0	0	193
AAATCTCACCAGGCCCGGACACCAGAAGGATTGACAGATTGATAGCTCTTTCTTGATTTGGTGGGTGGTGGTGCATGGCCGTTCTTAGTTGGTGGAGTGATTTGTCTGGTTAATTCCGATAACGAACGAGACTCTGTCCTGTTAAATAGATCCAACCTAGTCGTAGGGTTGGAATTTCTTCTTAGAGGGACTGGTGATTATTAGTCACACGAGATTGAGCAATAACAGGTCTGTGATGCCCTTAGATGTTCTTGGCCGCACACGCGCTACACTTAAGTGATCAGCTAGTT	0	0	0	0	0	0	0	0	0	0	0	0	568	0
GAAACTTACCAGGTCCAGACATAGTGAGGATTGACAGATTGATAGCTCTTTCTTGATTCTATGGGTGGTGGTGCATGGCCGTTCTTAGTTGGTGGAGTGATTTGTCTGGTTAATTCCGTTAACGAACGAGACCTTAGCCTACTAAATAGTCGTTTCAACACGGTTGACAATGACTTCTTAGAGGGACTTTGTACTAAATACAAGGAAGTTTGAGGCAATAACAGGTCTGTGATGCCCTTAGATGTCCTGGGCCGCACGCGTGCTACACTGACGCATACAGCGAGTATCTC	0	0	0	0	0	0	0	0	0	59	121	0	0	329
AAAACTTACCAGGTCCAGACATAGTGAGGATTGACAGATTGAGAGCTCTTTCTTGATTCTATGGGTGGTGGTGCATGGCCGTTCTTAGTTGGTGGAGTGATTTGTCTGGTTAATTCCGTTAACGAACGAGACCCCCGCCTGCTAAATAGTTGAGCGAATGCCTAGCATTGGCGTCAACTTCTTAGAGGGACTTTTGGTGACTAACCAAAGGAAGTTGGGGGCAATAACAGGTCTGTGATGCCCTTAGATGTCCTGGGCCGCACGCGCGCTACAATGATACACGCAACGAG	0	0	0	0	0	137	0	0	250	116	0	0	0	0
AAAACTTACCAGGTCCGGACATAGTAAGGATTGACAGATTGAAGATCTTTCTTGATTCTATGGGTGGTGGTGCATGGCCGTTCTTAGTTGGTGGAGTGATTTGTCTGGTTAATTCCGTTAACGAACGAGACCTCGACCTGCTAAATAGCTTGCCCGTGTTTACACGAGGTATTAGCTTCTTAGAGGGACTTTGGCTTTGAAGGCTACAGGAAGTTCGAGGCAATAACAGGTCTGTGATGCCCTTAGATGTTCTGGGCCGCACGCGCGCTACACTGACATGTTCATCGAGA	48	0	0	145	0	106	0	0	65	68	55	0	0	0
AAAACTTACCAGGTCAAGACATGGGCGTGATTGACAGGCTAATGACCTTTCTCGATTCCTTGGATGGTGGTGCATGGTCGCACTTAGTTGGTGCAGTGATTTGTCAGGTTTATTCCGGTAACGAACGAGACCTCGGCCTTGTAACTAGCTACGCTGCTTACAGGGACAATGACGGCTACGTCAAGGAAGTTCGAGGCAATTGCAGATCTGGAATGCCCTTAGATGTCCTGGGTCGCACGCGTGCTACAATGACGCCACGAACGAGTCCACGTGATGAAAGTCACGTGAAA	104	0	0	0	0	0	0	0	0	0	0	0	0	368
AAAACTTACCAGGTCAAGACATGGGCGTGATTGACAGGCTAATGACCTTTCTCGATTCCTTGGATGGTGGTGCATGGTCGCACTTAGTTGGTGCAGTGATTTGTCAGGTTTATTCCGGTAACGAACGAGACCTCGGCCTTGTAAATAGTTTAACTGCTTACAGGGACAATGTCGGCTACGTCAAGGAAGTTCGAGGCAATTGCAGATCTGGAATGCCCTTAGATGTCCTGGGTCGCACGCGTGCTACAATGACGCCACGAACGAGTTCATGTGATGAAAGTCACGTGAAA	0	0	0	0	0	0	0	0	214	131	118	0	0	0
AAAACTTACCAGGTCCAGACATAGTGAGGATTGACAGATTGAGAGTTCTTTCTTGATTCTATGGGTGGTGGTGCATGGCCGTTCTTAGTTGGTGGAGTGATTTGTCTGGTTAATTCCGTTAACGAACGAGACCGCCGCCTGCTAAATAGACCCGCGAATGGCTTTTCATTGGCGAGGTCTTCTTAGAGGGACGTTCATTCTACAAGATGAAGGAAGATGGCGGCAATAACAGGTCTGTGATGCCCTTAGATGTCCTGGGCCGCACGCGCGTTACACTGATGCACTCAACG	0	0	0	0	0	0	0	0	0	0	175	0	0	284
GAAACTTACCAGGTCCAGACATAGTGAGGATTGACAGATTGAGAGCTCTTTCTTGATTCTATGGGTGGTGGTGCATGGCCGTTCTTAGTTGGTGGAGTGATTTGTCTGGTTAATTCCGTTAACGAACGAGACCCCCGCCTGCTAAATAATTCTGCTAATGTTTTTTCATTGGTATTGAGTTTCTTAGAGGGACTTTCGGTGACTAACTGAAGGAAGTTGGGGGCAATAACAGGTCTGTGATGCCCTTAGATGTCCTGGGCCGCACGCGCGCTACACTGATGCATTCAGCA	281	0	0	0	0	0	0	0	0	174	0	0	0	0
GAAACTTACCAGGTCCAGACATAGTGAGGATTGACAGATTGATAGCTCTTTCTTGATTCTATGGGTGGTGGTGCATGGCCGTTCTTAGTTGGTGGAGTGATTTGTCTGGTTAATTCCGTTAACGAACGAGACCTTAGCCTACTAAATAGTCGTTACAATCATGATTGTCTACGACTTCTTAGAGGGACTTTGTAAGCAAATACAAGGAAGTTTGAGGCAATAACAGGTCTGTGATGCCCTTAGATGTCCTGGGCCGCACGCGTGCTACACTGACGCATACAACAAGTATT	0	0	0	191	198	0	0	0	0	0	0	0	0	0
AAAACTTACCAGGTCCAGACATAGTAAGGATTGACAGATTGATAGCTCTTTCTTGATTCTATGGGTGGTGGTGCATGGCCGTTCTTAGTTGGTGGAGTGATTTGTCTGGTTAATTCCGTTAACGAACGAGACCTCAGCCTGCTAAATAGTTGTACACTACTCTTAGTGCAGCAACTTCTTAGAGGGACTATGTGCGTTTAGCACATGGAAGTTTGAGGCAATAACAGGTCTGTGATGCCCTTAGATGTTCTGGGCCGCACGCGCGCTACACTGACGAATGCAACGAGCTT	0	0	0	0	385	0	0	0	0	0	0	0	0	0
AAAACTTACCAGGTCCAGACATAGTGAGGATTGACAGATTGAGAGCTCTTTCTTGATTCTATGGGTGGTGGTGCATGGCCGTTCTTAGTTGGTGGAGTGATTTGTCTGGTTAATTCCGTTAACGAACGAGACCCCTGCCTGCTAAATAGCACGTGTAGTGTTTATCACTGCATTTGTGCTTCTTAGAGGGACGTGCGTTCTATTAGACGCAGGAAGATAGGGGCAATAACAGGTCTGTGATGCCCTTAGATGTTCTGGGCCGCACGCGCGCTACACTGATGCATTCAACG	370	0	0	0	0	0	0	0	0	0	0	0	0	0
AAAACTTATCAGGTCCAGACATAGTGAGGATTGACAGATTGAGAGCTCTTTCTTGATTCTATGGGTGGTGGTGCATGGCCGTTCTTAGTTGGTGGAGTGATTTGTCTGGTTAATTCCGTTAACGAACGAGACCCCAGCCTGCTAAATAATCACGCTAATGATTTTTCATTGACGATGGTTTCTTAGAGGGACATGTAGTATAAAACTACAGGAAGATTGGGGCAATAACAGGTCTGTGATGCCCTTAGATGTTCTGAACCGCACGCGTGTTACACTGATGCATTCAACGA	287	78	0	0	0	0	0	0	0	0	0	0	0	0
AAAACTTACCAGGTCCAGACATAGTGAGGATTGACAGATTGAAGATCTTTCTTGATTCTATGGGTGGTGGTGCATGGCCGTTCTTAGTTGGTGGAGTGATTTGTCTGGTTAATTCCGTTAACGAACGAGACCCCGACCTGCTAAATAGAGCGACTAATCCTTGTGATTGGTCGGTACTTCTTAGAGGGACTGTTGGTGCCTAGCCAATGGAAGTTCGGGGCAATAACAGGTCTGTGATGCCCTTAGATGTTCTGGGCCGCACGCGCGCTACACTGATGAGTTCATCGAGC	0	0	0	0	0	0	0	44	0	0	0	0	0	318
GAAACTTACCAGGTCCAGACATAGTAAGGATTGACAGATTGAGAGCTCTTTCTTGATTCTATGGGTGGTGGTGCATGGCCGTTCTTAGTTGGTGGAGTGATTTGTCTGGTTAATTCCGTTAACGAACGAGACCCCCGCCTGCTAAATAGTACTGGGAATGCTTAGCATTGCCAGAGACTTCTTAGAGGGACTTTCGGCGCTAGGCCGAAGGAAGTTGGGGGCAATAACAGGTCTGTGATGCCCTTAGATGTCCTGGGCCGCACGCGCGCTACACTGATGCGTTCAACGAG	0	0	0	0	193	0	0	142	0	0	0	0	0	0
GAAACTTACCAGGTCCAGACATAGTAAGGATTGACAGATTGAGAGCTCTTTCTTGATTCTATGGGTGGTGGTGCATGGCCGTTCTTAGTTGGTGGAGTGATTTGTCTGGTTAATTCCGTTAACGAACGAGACCCCCGCCTGCTAAATAGCGCGCGGTATGCTTGCATATCGTGCTCGCTTCTTAGAGGGACTTTGTGTGACTAACACAAGGAAGTTGGGGGCAATAACAGGTCTGTGATGCCCTTAGATGTTCTGGGCCGCACGCGCGCTACACTGATGCATGCAACGAG	0	0	0	0	333	0	0	0	0	0	0	0	0	0
AAAACTTATCAGGTCCAGACATAGTGAGGATTGACAGATTGAGAGCTCTTTCTTGATTCTATGGGTGGTGGTGCATGGCCGTTCTTAGTTGGTGGAGTGATTTGTCTGGTTAATTCCGTTAACGAACGAGACCCCAGCCTGCTAAATAATCACAGTAATGATTTTTCATTGTTGATTGGTTTCTTAGAGGGACATGGAGTATAAAACTCCAGGAAGATTGGGGCAATAACAGGTCTGTGATGCCCTTAGATGTTCTGAACCGCACGCGTGTTACACTGACGTATTCAACG	152	0	0	0	0	0	0	0	91	89	0	0	0	0
AAATCTCACCAGGCCCGGACACCAGAAGGATTGACAGATTGATAGCTCTTTCTTGATTTGGTGGGTGGTGGTGCATGGCCGTTCTTAGTTGGTGGAGTGATTTGTCTGGTTAATTCCGATAACGAACGAGACTCTGTCCTGTTAAATAGATCCAACCTAGTCGTAGGGTTGGAATTTCTTCTTAGAGGGACTGGTGATTATTAGTCACACGAGATTGAGCAATAACAGGTCTGTGATGCCCTTAGATGTTCTGGGCCGCACACGCGCTACACTGCAGTGATCAGCTAGTT	0	0	0	0	0	0	0	0	0	0	0	304	0	0
AAAACTTACCAGGTCCAGACATAGTGAGGATTGACAGATTGATAGCTCTTTCTTGATTCTATGGGTGGTGGTGCATGGCCGTTCTTAGTTGGTGGAGTGATTTGTCTGGTTAATTCCGTTAACGAACGAGACCTTAGCCTGCTAACTAGTCGCGGCGATCTCGATCGTCGTCGGCTTCTTAGAGGGACTTTGTGGCACTAAACACAAGGAAGTTTGAGGCAATAACAGGTCTGTGATGCCCTTAGATGTCCTGGGCCGCACGCGTGCTACACTGACGCCTACAGCGAGTA	0	0	0	0	276	0	0	0	0	0	0	0	0	0
AAAACTTACCAGGTCAAGACATGGGCGTGATTGACAGGCTGATGACCTTTCTCGATTCCTTGGATGGTGGTGCATGGTCGCACTTAGTTGGTGCAGTGATTTGTCAGGTTTATTCCGGTAACGAACGAGACCTCGGCCTTGTAACTAGTTTACTGCTTACAGGGACAATGTCGGCTACGTCAAGGAAGTTCGAGGCAATTGCAGATCTGGAATGCCCTTAGATGTCCTGGGTCGCACGCGTGCTACAATGACGCCACGAGCGAGTGTGCGTGACGGAACTCACGTGAAAT	0	0	0	0	0	0	0	0	0	119	112	0	0	42
AAAACTTACCAGGTCCGGACATAGTGAGGATTGACAGATTGAAGATCTTTCTTGATTCTATGGGTGGTGGTGCATGGCCGTTCTTAGTTGGTGGAGTGATTTGTCTGGTTAATTCCGTTAACGAACGAGACCTCGACCTGCTAAATAGTTCGGCAAATTCTTCGGGATTTGTACGTGACTTCTTAGAGGGACTATCGGTGGTTAGCCGATGGAAGTTCGAGGCAATAACAGGTCTGTGATGCCCTTAGATGTTCTGGGCCGCACGCGCGCTACACTGATTGGTTCATCGA	0	0	0	0	0	0	0	270	0	0	0	0	0	0
AAAACTTACCAGGTCCAGACATAGTGAGGATTGACAGATTGAAGATCTTTCTTGATTCTATGGGTGGTGGTGCATGGCCGTTCTTAGTTGGTGGAGTGATTTGTCTGGTTAATTCCGTTAACGAACGAGACCTCGACCTGCTAAATAGTTTGGCGAACCCTTCGGGGTTCGTACATGACTTCTTAGAGGGACTATCGGTGTGTAGCCGATGGAAGTTCGAGGCAATAACAGGTCTGTGATGCCCTTAGATGTTCTGGGCCGCACGCGCGCTACACTGATGCGTTCATCGA	0	0	0	0	0	0	0	0	265	0	0	0	0	0
AAAACTTACCAGGTCCAGACATAGTGAGGATTGACAGATTGATAGCTCTTTCTTGATTCTATGGGTGGTGGTGCATGGCCGTTCTTAGTTGGTGGAGTGATTTGTCTGGTTAATTCCGTTAACGAACGAGACCTTAGCCTGCTAACTAGTCGCGGCGATCTCGATCGTCGTCGACTTCTTAGAGGGACTTTGTGGCACTAAACACAAGGAAGTTTGAGGCAATAACAGGTCTGTGATGCCCTTAGATGTCCTGGGCCGCACGCGTGCTACACTGACGCCTACAGCGAGTA	265	0	0	0	0	0	0	0	0	0	0	0	0	0
GAAACTTACCAGGTCCAGACATAGTAAGGATTGACAGATTGATAGCTCTTTCTTGATTCTATGGGTGGTGGTGCATGGCCGTTCTTAGTTGGTGGAGTGATTTGTCTGGTTAATTCCGATAACGAACGAGACCTTAACCTGCTAACTAGATATGCTCATTATATGGGTACAATCTTCTTAGAGGGACTATGTTTTGATAAATGCATGGAAGTTTGAGGCAATAACAGGTCTGTGATGCCCTTATATGTCCTGGGCTGCACGCGTGCTACACTGATGCATACAACAAGTAT	0	0	0	0	0	0	0	0	263	0	0	0	0	0
AAAACTTACCAGGTCCGGACATAGTGAGGATTGACAGATTGAAGATCTTTCTTGATTCTATGGGTGGTGGTGCATGGCCGTTCTTAGTTGGTGGAGTGATTTGTCTGGTTAATTCCGTTAACGAACGAGACCTCGACCTACTAAATAGTTTAGCGAACTCTTCGGGGTTCGTGTGGACTTCTTAGAGGGACTTTAGATGAGTAGTCTAAGGAAGTTCGAGGCAATAACAGGTCTGTGATGCCCTTAGATGTTCTGGGCCGCACGCGCGCTACACTGACTGGTTCATCGAG	263	0	0	0	0	0	0	0	0	0	0	0	0	0
AAAACTTACCAGGTCCAGACATAGTGAGGATTGACAGATTGAGAGCTCTTTCTTGATTCTATGGGTGGTGGTGCATGGCCGTTCTTAGTTGGTGGAGTGATTTGTCTGGTTAATTCCGTTAACGAACGAGACCCCCGCCTGCTAAATAGATGCCATTATTCTTTGTAATAATGTTCGCATCTTCTTAGAGGGACTTTCGGTGACTAACCGAAGGAAGTTGGGGGCAATAACAGGTCTGTGATGCCCTTAGATGTTCTGGGCCGCACGCGCGCTACACTGACACACGCAAC	0	0	0	0	0	0	0	0	0	0	259	0	0	0
GAAACTTACCAGGTCCAGACATAGTGAGGATTGACAGATTGATAGCTCTTTCTTGATTCTATGGGTGGTGGTGCATGGCCGTTCTTAGTTGGTGGAGTGATTTGTCTGGTTAATTCCGTTAACGAACGAGACCTTAGCCTACTAAATAGTTACCTCAATTACAATTGTTGTAACTTCTTAGAGGGACTTTGTAAGCAAATACAAGGAAGTTTGAGGCAATAACAGGTCTGTGATGCCCTTAGATGTCCTGGGCCGCACGCGTGCTACACTGACACATACAGCGAGTTCAC	0	0	0	0	0	0	0	0	0	0	0	0	258	0
AAAACTTACCAGGTCCGGACATAGTGAGGATTGACAGATTGAAGATCTTTCTTGATTCTATGGGTGGTGGTGCATGGCCGTTCTTAGTTGGTGGAGTGATTTGTCTGGTTAATTCCGTTAACGAACGAGACCTCGACCTGCTAAATAGTTCGACAAATTCTTCGGGATTTGTACGTGACTTCTTAGAGGGACTATCGGTGGGTAGCCGATGGAAGTTCGAGGCAATAACAGGTCTGTGATGCCCTTAGATGTTCTGGGCCGCACGCGCGCTACACTGACTAGTTCATCGA	0	0	0	0	0	0	0	0	0	247	0	0	0	0
GAAACTTACCAGGTCCAGACATAGTAAGGATTGACAGATTGAGAGCTCTTTCTTGATTCTATGGGTGGTGGTGCATGGCCGTTCTTAGTTGGTGGAGTGATTTGTCTGGTTAATTCCGTTAACGAACGAGACCTTAACCTACTAAATAGTTACACAAACTTTGGTTTGTGGATATACTTCTTAGAGGGACTATTCGTGCTAGTGAATGGAAGTTTGAGGCAATAACAGGTCTGTGATGCCCTTAGATGTTCTGGGCCGCACGCGCGCTACACTGATGAAAGCAACAAGTT	0	0	0	0	0	0	0	0	0	0	0	0	0	233
AAAACTTACCAGGTCCAGACATAGTGAGGATTGACAGATTGAGAGTTCTTTCTTGATTCTATGGGTGGTGGTGCATGGCCGTTCTTAGTTGGTGGAGTGATTTGTCTGGTTAATTCCGTTAACGAACGAGACCGCCGCCTGCTAAATAGCTCTGCTAATGGATTTTCATTGGTAAGAGCTTCTTAGAGGGACGTTCATTCTACAAGATGAAGGAAGATGGCGGCAATAACAGGTCTGTGATGCCCTTAGATGTCCTGGGCCGCACGCGCGCTACACTGATGCACTCAACG	0	0	0	0	0	0	0	0	0	95	132	0	0	0
AAAACTTACCAGGTCCAGACATAGTGAGGATTGACAGATTGAGAGCTCTTTCTTGATTCTATGGGTGGTGGTGCATGGCCGTTCTTAGTTGGTGGGTTGCCTTGTCAGGTTGATTCCGGTAACGAACGAGACCTCAGCCTGCTAAATAGTCCGGCTTGGTTCTTCCAGGTCGCTGACTTCTTAGAGGGACTCTCGGCGACTAGCCGATGGAAGTGTGAGGCGATAACAGGTCTGTGATGCCCTTAGATGTTCTGGGCCGCACGCGCGCTACACTGATGCAATCAACGAGC	0	0	0	0	144	0	0	48	0	0	0	0	0	0
AAAACTTACCAGGTCCAGACATAGTGAGGATTGACAGATTGAGAGCTCTTTCTTGATTCTATGGGTGGTGGTGCATGGCCGTTCTTAGTTGGTGGGTTGCCTTGTCAGGTTGATTCCGGTAACGAACGAGACCTCAGCCTGCTAACTAGTCACGCCTTCTCCGGAAGGCGGCGGACTTCTTAGAGGGACTATTGGCGATTAGCCAATGGAAGCATGAGGCAATAACAGGTCTGTGATGCCCTTAGATGTTCTGGGCCGCACGCGCGCTACACTGATGCATTCAACGAGCC	0	0	0	0	192	0	0	0	0	0	0	0	0	0
GAAACTTACCAGGTCCAGACATAGTGAGGATTGACAGATTGAAGATCTTTCTTGATTCTATGGGTGGTGGTGCATGGCCGTTCTTAGTTGGTGGAGTGATTTGTCTGGTTAATTCCGTTAACGAACGAGACCTCGACCTGCTAAATAGTTCGGCGAACCTTTCGGGGTTCGTGCGTGACTTCTTAGAGGGACTATCGGTGTGTAGCCGGTGGAAGTTCGAGGCAATAACAGGTCTGTGATGCCCTTAGATGTTCTGGGCCGCACGCGCGCTACACTGATTCGTTCATCGA	0	0	0	0	0	0	0	0	0	0	183	0	0	0
GAAACTTACCAGGTCCAGACATTGTGAGGATTGACAGATTGAGAGCTCTTTCTTGATTCGATGGGTGGTGGTGCATGGCCGTTCTTAGTTGGTGGAGTGATTTGTCTGGTTAATTCCGTTAACGAACGAGACCGCAGCCTGCTAAATAGTGGCGCGAACCCTCCGTTCGCGCGCGCTTCTTAGAGGGACAACTTGTTTTCAACAAGTGGAAGTTCGCGGCAATAACAGGTCTGTGATGCCCTTAGATGTTCTGGGCCGCACGCGCGCTACACTGATGCATTCAACGAGTC	162	0	0	0	0	0	0	0	0	0	0	0	0	0
GAAACTCACCAGGTCCAGACATGGGAAGGATTGACAGATTGAGAGCTCTTTCTTGATTCTATGGGTGGTGGTGCATGGCCGTTCTTAGTTGGTGGAGTGATTTGTCTGGTTAATTCCGTTAACGAACGAGACCTCAGCCTGCTAACTAGTCACAGTAGTCTTGACTGCTGGCCGGCTTCTTAGAGGGACTGATCGAGTTTATCGATCGGAAGTTTGAGGCAATAACAGGTCTGTGATGCCCTTAGATGTTCTGGGCCGCACGCGCGCTACACTGATGACTCCAACGAGCA	0	0	0	0	0	0	0	0	0	143	0	0	0	0
AAAACTTACCAGGTCCGGACATAGTGAGGATTGACAGATTGAAGATCTTTCTTGATTCTATGGGTGGTGGTGCATGGCCGTTCTTAGTTGGTGGAGTGATTTGTCTGGTTAATTCCGTTAACGAACGAGACCTTAGCCTACTAAATAGTCGTAACAATATTCATTGGCTGCGACTTCTTAGAGGGACTTTGCAAGCAACTGCAAGGAAGTTTGAGGCAATAACAGGTCTGTGATGCCCTTAGATGTCCTGGGCCGCACGCGTGCTACACTGACGCATACAGCGAGTATCA	0	0	0	0	0	0	0	134	0	0	0	0	0	0
GAAACTTACCAGGTCCAGACATAGTGAGGATTGACAGATTGATAGCTCTTTCTTGATTCTATGGGTGGTGGTGCATGGCCGTTCTTAGTTGGTGGAGTGATTTGTCTGGTTAATTCCGTTAACGAACGAGACCCCCGCCTGCTAAATAGTTATATCAATGCTTAGCATTGGTATTAGCTTCTTAGAGGGACTTTTGGTGACTAACCAAAGGAAGTTGGGGGCAATAACAGGTCTGTGATGCCCTTAGATGTCCTGGGCCGCACGCGCGCTACACTGACACACGCAGCGAG	0	0	0	0	0	0	0	0	0	133	0	0	0	0
AAAACTTACCAGGTCCAGACGTAGTGAGGATTGACAGATTGATAGCTCTTTCTTGATTCTGCGGGTGGTGGTGCATGGCCGTTCTTAGTTGGTGGAGTGATTTGTCTGGTTAATTCCGTTAACGAACGAGACCTTAGCCTGCTAACTAGTCGCGGCGATCTCGATCGGCCGCCGGCTTCTTAGAGGGACTTTGTGGCTCTAAACACAAGGAAGTTTGAGGCAATAACAGGTCTGTGATGCCCTTAGATGTCCTGGGCCGCACGCGTGCTACACTGACGCCTACAACGAGT	0	132	0	0	0	0	0	0	0	0	0	0	0	0
AAAACTTACCAGGTCCAGACATAGTGAGGATTGACAGATTGATAGCTCTTTCTTGATTCTATGGGTGGTGGTGCATGGCCGTTCTTAGTTGGTGGAGTGATTTGTCTGGTTAATTCCGTTAACGAACGAGACCTTAGCCTGCTAACTAGTCGCTGTTATCTCGATAATAGTCGGCTTCTTAGAGGGACTTTGTGAATCAAACACAAGGAAGTTTGAGGCAATAACAGGTCTGTGATGCCCTTAGATGTCCTGGGCCGCACGCGTGCTACACTGACGCCTACAGCGAGTAC	0	0	0	0	0	0	0	0	0	127	0	0	0	0
TACGGAGGATGCAAGCGTTATCCGGATTTATTGGGTTTAAAGGGTCCGTAGGCGGATCTTTAAGTCAGTGGTGAAAGCCCACAGCTCAACTGTGGAACTGCCATTGATACTGGAGATCTTGAGTGTAGTAGAAGTAGGCGGAATAGGGCATGTAGCGGTGAAATGCATAGATATGCCCTAGAACACCGATTGCGAAGGCAGCTTACTATGTTACAACTGACGCTGAGGGACGAAAGCGTGGGGAGCAAACAGGATTAGAAACCCTAGTAGTCCGGCTGACTGACTCCAGT	0	0	0	0	0	0	119	0	0	0	0	0	0	0
AAAACTTACCAGGTCCGGACATAGTGAGGATTGACAGATTGAAGATCTTTCTTGATTCTATGGGTGGTGGTGCATGGCCGTTCTTAGTTGGTGGAGTGATTTGTCTGGTTAATTCCGTTAACGAACGAGACCTCGACCTGCTAAATAGTTCGGCAAATTCTTCGGGATTTGTACGTGACTTCTTAGAGGGACTATCGGTGGTTAGCCGATGGAAGTTCGAGGCAATAACAGGTCTGTGATGCCCTTAGATGTTCTGGGCCGCACGCGCGCTACACTGACTGGTTCATCGA	115	0	0	0	0	0	0	0	0	0	0	0	0	0
AAATCTCACCAGGCCCGGACACTGGAAGGATTGACAGATTGAGAGCTCTTTCTCGATTCGGTGGGTGGTGGTGCATGGCCGTTCTTAGTTGGTGGAGTGATTTGTCTGGTTAATTCCGATAACGAACGAGACTCTGTCCTGCTAAATAGTTTCAGCGTCTTTTTGCGCTGAAAATTCTTCTTAGAGGGACTGGCGGCGTCTAGCCGCACGAGATTGAGCAATAACAGGTCTGTGATGCCCTTAGATGTTCTGGGCCGCACGCGCGCTACACTGAAGGGATCAGCGTGTTT	0	0	0	0	0	0	0	0	0	0	114	0	0	0
AAAACTTACCAGGTCCAGACATAGTGAGGATTGACAGATTGAGAGCTCTTTCTTGATTCTATGGGTGGTGGTGCATGGCCGTTCTTAGTTGGTGGGTTGCCTTGTCAGGTTGATTCCGGTAACGAACGAGACCTCAGCCTGCTAAATAGTCACGGTCGCTCCGGCGGCTGGCGGACTTCTTAGAGGGACTAATGGCGACTAGCCATTGGAAGCATGAGGCAATAACAGGTCTGTGATGCCCTTAGATGTTCTTGGCCGCACGCGCGCTACACTGATGCATTCAACGAGCC	0	0	0	0	0	0	0	0	0	0	0	0	0	112
GAAACTTACCAGGTCCAGACATAGTAAGGATTGACAGATTGAGAGCTCTTTCTTGATTCTATGGGTGGTGGTGCATGGCCGTTCTTAGTTGGTGGAGTGATTTGTCTGGTTAATTCCGTTAACGAACGAGACCTCAGCCTACTAAATAGTCCTACAAATTCTGAATTTGTAGCGGACTTCTTAGAGGGACTATTGGCGTTTAGCCAATGGAAGTTTGAGGCAATAACAGGTCTGTGATGCCCTTAGATGTTCTGGGCCGCACGCGCGCTACACTGATGAATTCAACGAGC	0	0	0	0	0	0	0	107	0	0	0	0	0	0
AAAACTTACCAGGTCCAGACATAGTAAGGATTGACAGATTGATAGCTCTTTCTTGATTCTATGGGTGGTGGTGCATGGCCGTTCTTAGTTGGTGGAGTGATTTGTCTGGTTAATTCCGTTAACGAACGAGATCTTACCTTGCTAAATAGTTACGTGTAACTTCGTTTACGCGGGCAGCTTCTTAGAGGGACTTTGTGTGTATAACGCAAGGAAGTTTGAGGCAATAACAGGTCTGTGATGCCCTTAGATGTTCTGGGCTGCACGCGCGCTACACTGATGTGCTCAACGAG	0	0	0	0	106	0	0	0	0	0	0	0	0	0
AAAACTTACCAGGTCCAGACATAGTTATGATTGACAGATTGAAGATCTTTCTTAATTCTATGGGTGGTGGTGCATGGCCGTTCTTAGTTGGTGGAGTGATTTGTCTGGTTAATTCCGTTAACGAACGAGACCTCGACCTGCTAAATAGTTCGGCGAATCCTTCGGGATTCGTTCGTGACTTCTTAGAGGGACTATCGGTGTGTAGCCGATGGAAGTTCGAGGCAATAACAGGTCTGTGATGCCCTTAGATGTTCTGGGCCGCACGCGCGCTACACTGAGTACTTCATCGA	0	0	0	0	0	0	0	0	0	0	0	0	0	105
AAACCTTACCAGGTCCGGACATAGGAAGGATTGACAGATTGAGAGCTCTTTCTTGATTCTATGGGTGGTGGTGCATGGCCGTTCTTAGTTGGTGGAGTGATTTGTCTGGTTAATTCCGTTAACGAACGAGACCTTAACCTACTAACTGGCCGCCTGAGTGGCAACGCTCAGGAATAAGGCCTCTTAGAGGGACGATCTGTGATTAGCAGATGGAGGAATAAGGCAATAACAGGTCTGTGATGCCCTTAGATGTTCTGGGCCGCACGCGCGCTACAATGATGCAGGCAACG	100	0	0	0	0	0	0	0	0	0	0	0	0	0
AAAACTTACCAGGTCCAGACATAGTAAGGATTGACAGATTGAGAGCTCTTTCTTGATTCTATGGGTGGTGGTGCATGGCCGTTCTTAGTTGGTGGAGTGATTTGTCTGGTTAATTCCGTTAACGAACGAGACCCCCGCCTGCTAAATAGTTCGCTTAATGAATTTCATTTCGTAGAGCTTCTTAGAGGGACTTTGCGTGACTAACGCAAGGAAGTTGGGGGCAATAACAGGTCTGTGATGCCCTTAGATGTCCTGGGCCGCACGCGCGCTACACTGATGCATTCAACGAG	0	0	0	0	0	0	0	0	0	94	0	0	0	0
GAAACTTACCAGGTCCAGACATAGTGAGGATTGACAGATTGAGAGCTCTTTCTTGATTCTATGGGTGGTGGTGCATGGCCGTTCTTAGTTGGTGGAGTGATTTGTCTGGTTAATTCCGTTAACGAACGAGACCCCCGCCTGCTAACTAGTGATACGAATGCTTAGCATTGGTGTTCGCTTCTTAGAGGGACTTTTGGTGACTAACCAAAGGAAGTTGGGGGCAATAACAGGTCTGTGATGCCCTTAGATGTCCTGGGCCGCACGCGCGCTACACTGACACACGCAGCGAG	0	0	0	0	0	0	0	0	0	0	0	0	0	88
GAAACTTACCAGGTCCAGACATAGTAAGGATTGACAGATTGAGAGCTCTTTCTTGATTCTATGGGTGGTGGTGCATGGCCGTTCTTAGTTGGTGGAGTGATTTGTCTGGTTAATTCCGTTAACGAACGAGACCTTAACCTACTAAATAGTTACACAAACTTTGGTTTGTGGATATACTTCTTAGAGGGACTATTCGTGCTAGTGAATGGAAGTTTGAGGCAATAACAGGTCTGTGATGCCCTTAGATGTTCTTGGCCGCACGCGCGCTACACTGATGAAAGCAACAAGTT	0	0	0	0	0	0	0	0	87	0	0	0	0	0
AAACCTTACCAGGTCCGGACATAGGAAGGATTGACAGATTGAGAGCTCTTTCTTGATTCTATGGGTGGTGGTGCATGGCCGTTCTTAGTTGGTGGAGTGATTTGTCTGGTTAATTCCGTTAACGAACGAGACCTTAACCTACTAACTGGCCGCCTGAGTGGCAACGCTCAGGATCAAGGCCTCTTAGGGGGACGATCTGTGACTAACAGATGGAAGCATAAGGCAATAACAGGTCTGTGATGCCCTTAGATGTTCTGGGCCGCACGCGCGCTACAATGATGCAGGCAACG	0	0	0	0	0	31	0	54	0	0	0	0	0	0
AAAACTTACCAGGTCCAGACATAGTTAGGATTGACAGGTTGAAGACCTTTCTTGATTCTATGGGTGGTGGTGCATGGCCGTTCTTAGTTGGTGGAGTGATTTGTCTGGTTAATTCCGTTAACGAACGAGACCTCGACCTGCTAAATAGTTCGGCGTATCTTAGGATACGTACGTGACTTCTTAGAGGGACTATCAGGAGAGTATCCGATGGAAGTTCGAGGCAATAACAGGTCTGTGATGCCCTTAGATGTTCTGGGCCGCACGCGCGCTACACTGATTCGTTCATCGAG	0	0	0	0	0	0	0	84	0	0	0	0	0	0
AAAACTCACCAGGTCCAGACATAGTAAGGATTGACAGATTGAGAGCTCTTTCATGATTCTATGGGTGGTGGTGCATGGCCGTTCTTAGTTGGTGGAGTGATTTGTCTGGTTAATTCCGATAACGAACGAGACCTTAACCTGCTAAATAGTTGCTCGAATTTTTATTCGGGTCAACTTCTTAGAGGGACTGACTACGTTTAGTAGTCGGAAGTTTGAGGCAATAACAGGTCTGTGATGCCCTTAGATGTTCTGGGCCGCACGCGCGCTACACTGATAAAGGCAGCGAGTAT	0	0	0	0	27	0	0	56	0	0	0	0	0	0
GAAACTTACCAGGTCCAGACATAGTGAGGATTGACAGATTGAGAGCTCTTTCTTGATTCTATGGGTGGTGGTGCATGGCCGTTCTTAGTTGGTGGAGTGATTTGTCTGGTTAATTCCGTTAACGAACGAGACCCCCGCCTGCTAAATAGTCATATTAATGCTTAGCATTGATGTTGGCTTCTTAGAGGGACTTTCGGTGACTAACCGAAGGAAGTTGGGGGCAATAACAGGTCTGTGATGCCCTTAGATGTCCTGGGCCGCACGCGCGCTACACTGACACACGCAGCGAG	0	0	0	0	0	0	0	0	0	0	0	74	0	0
AAATCTGGCAGCATCTCACCCTACGGCTAGTCCAGACTTTATTTTTCCATCCTAGAAACCCTGACATTGATTTTAATGTTTAACCATGAACATACAGTACAAATTGCGGAACTCTATGACAACCCGTTGCAGGGGAGCTTGCAATTATTCTCCGTGAACCAGGAATTCCCAGTAGGTGCAAGTCATAAGCTTGCATCGATTACGTCCCTGCCCTTTGTGCACACCGCCCGTCTGCTGACTGACTGGAGGTTATCCGATCTCGTATGCCGTCTTCTGCTTGAAAAAAAAAA	0	0	0	0	0	0	0	0	0	0	0	61	0	0
AAAACTTACCAGGTCCAGACATAGTGAGGATTGACAGATTGATAGCTCTTTCTTGATTCTATGGGTGGTGGTGCATGGCCGTTCTTAGTTGGTGGAGTGATTTGTCTGGTTAATTCCGTTAACGAACGAGACCTTAGCCTACTAACTAGTCGAGCCAATCTACGATTGGCCGCGACTTCTTAGAGGGACTTTGTGGGCCAAACACAAGGAAGTTTGAGGCAATAACAGGTCTGTGATGCCCTTAGATGTCCTGGGCCGCACGCGTGCTACACTGACGCATACAGCGAGTA	0	0	0	0	0	0	0	0	0	0	0	0	56	0
AAAACTTACCAGGTCAAGACATGGGCGTGATTGACAGGCTAATGACTTTTCTCGATTCCATGGATGGTGGTGCATGGTCGCACTTAGTTGGTGCAGTGATTTGTCAGGTTTATTCCGGTAACGAACGAGACCTCGGCCTTGTAAATAGCTATGCTGCTTACAGGGACATTGGCGGCTACGCCAAGGAAGCTCGAGGCAATTGCAGATCTGGAATGCCCTTAGATGTCCTGGGTCGCACGCGTGCTACAATGACGCCACGCACGAGCTTGCATGATGAAAGTTATGCATAA	0	0	0	0	0	0	0	54	0	0	0	0	0	0
GAACTTTACCAGATCCGGACAGGGTGAGGATTGACAGATTGAGTGTTCTTTCTCGATCCCCTGAATGGTGGTGCATGGCCGCTTTTGGTCGGTGGAGTGATTTGTTTGGTTGATTCCGTCAACGGACGAGATCCAAGCCGCCTAGTAGATGTCAAAATCATTCAAAGATAGCAATCTCTTGCTTGGCTTCGGCCGACGGGAGTTACCTTTGGTTGGCATCTTCTTTGCGGGATTCCTGGCTTTGCGTCAGGTGAGATTTTGGGCAACAGCAGGTCTGTGATGCTCCTCAA	0	0	0	0	0	0	0	0	26	24	0	0	0	0
AAAACTCACCAGGTCCGGACATAGTAAGGATTGACAGATTGAGAGCTCTTTCTTGATTCTGTGGGTGGTGGTGCATGGCCGTTCTTAGTTGGTGGAGTGATTTGTCTGGTTAATTCCGATAACGAACGAGACCTTAACCTGCTAACTAGTAGCATGTGTTTCGACACATGCCGACTTCTTAGAGGGACTGACTACGTTTAGTAGTCGGAAGTTTGAGGCAATAACAGGTCTGTGATGCCCTTAGATGTTCTGGGCTGCACGCGCGCTACACTGACAAAGTCAGCGAGTTT	0	0	0	0	0	49	0	0	0	0	0	0	0	0
AAAACTTACCAGGTCCAGACATAGTGAGGATTGACAGATTGAGAGCTCTTTCTTGATTCTATGGGTGGTGGTGCATGGCCGTTCTTAGTTGGTGGAGTGATTTGTCTGGTTAATTCCGTTAACGAACGAGACCCCTGCCTGCTAAATAATCCGCCGAATGCTTTTTGCATTGGGTAGGGTTTCTTAGAGGGACGTCCAAGATCAACTTGGAGGAGGATAGGGGCAATAACAGGTCTGTGATGCCCTTAGATGTCCTGGGCCGCACGCGCGCTACACTGATGCATTCAACG	0	0	0	0	47	0	0	0	0	0	0	0	0	0
GAAACTTACCAGGTCAAGACATAAGTGGGATTGACAGATTGAGAGCTCTTTCTTGATTCTATGGGTGGTGGTGCATGGCCGTTCTTAGTTGGTGGAGTGATTTGTCTGGTTAATTCCGTTAACGAACGAGACCTTAACCTGCTAACTAGTCGTCTTGTGAACAACGGGATGGACTTCTTAGAGGGACTATGCGTTCAAGCGCATGGAAGTTTGAGGCAATAACAGGTCAGTGATGCCCTTAGATGTCCTGGGCCGCACGCGCGCTACATTGATACGTGCAACAAGTACAT	0	0	0	0	0	0	0	41	0	0	0	0	0	0
AAAACTTACCAGGTCCAGACATAGTGAGGATTGACAGATTGAGAGCTCTTTCTTGATTCTATGGGTGGTGGTGCATGGCCGTTCTTAGTTGGTGGAGTGATTTGTCTGGTTAATTCCGTTAACGAACGAGACCCCTGCCTGCTAAATAGTTGGGTGAATGAATTTTCATTGACTACAGCTTCTTAGAGGGACGTGCGTTCTATTAGACGCAGGAAGATAGGGGCAATAACAGGTCTGTGATGCCCTTAGATGTCCTGGGCCGCACGCGCGCTACACTGATGCAATCAACG	0	0	0	0	0	0	0	0	0	0	0	0	0	41
AAACCTTACCAGGTCCGGACATAGGAAGGATTGACAGATTGAGAGCTCTTTCTTGATTCTATGGGTGGTGGTGCATGGCCGTTCTTAGTTGGTGGAGTGATTTGTCTGGTTAATTCCGTTAACGAACGAGACCTTAACCTACTAACTGGCCGCCTGAGTGGCAACGCTCAGGATCAAGGCCTCTTAGGGGGACGATCTGTGACTAACAGATGGAAGCATAAGGCAATAACAGGTCTGTGATGCCCTTAGATGTTCTGTGCCGCACGCGCGCTACAATGATGCAGGCAACG	0	0	0	0	36	0	0	0	0	0	0	0	0	0
AAATCTCACCAGGCCCGGACACCAGAAGGATTGACAGATTGATAGCTCTTTCTTGATTTGGTGGGTGGTGGTGCATGGCCGTTCTTAGTTGGTGGAGTGATTTGTCTGGTTAATTCCGATAACGAACGAGACTCTGTCCTGCTAAATAGATGCAACCTTTCTTTTGGGTTGCAATTTCTTCTTAGAGGGACTGGCGATTATTAGTCGCACGAGATTGAGCAATAACAGGTCTGTGATGCCCTTAGATGTTCTTGGCCGCACACGCGCTACACTGAATTGATCAGCTAGTT	28	0	0	0	0	0	0	0	0	0	0	0	0	0
AAAACTTACCAGGTCCAGACATAGTGAGGATTGACAGATTGAGAGCTCTTTCTTGATTCTATGGGTGGTGGTGCATGGCCGTTCTTAGTTGGTGGGTTGCCTTGTCAGGTTGATTCCGGTAACGAACGAGACCTCAGCCTACTAAATAGTCACGGTCGCTCCGGCGGCTGGCGGACTTCTTAGAGGGACTAATGGCGACTAGCCATTGGAAGCATGAGGCAATAACAGGTCTGTGATGCCCTTAGATGTTCTTGGCCGCACGCGCGCTACACTGATGCATTCAACGAGCC	26	0	0	0	0	0	0	0	0	0	0	0	0	0
TACGGAGGGTCCGAGCGTTAATCGGAATTACTGGGCGTAAAGCGTGCGCAGGCGGTTTGTTAAGCGAGATGTGAAAGCCCCGGGCTCAACCTGGGAATTGCATTTCGAACTGGCGAACTAGAGTCTTGTAGAGGGGGGTAGAATTCCAGGTGTAGCGGTGAAATGCGTAGAGATCTGGAGGAATACCGGTGGCGAAGGCGGCCCCCTGGACAAAGACTGACGCTCAGGCACGAAAGCGTGGGGAGCAAACAGGATTAGAAACCCTAGTAGTCCGGCTGACTGACTAGGCT	0	0	0	0	0	0	25	0	0	0	0	0	0	0
AAAACTTACCAGGTCAAGACATGGGCGTGATTGACAGGCTAATGACTTTTCTCGATTCCATGGATGGTGGTGCATGGTCGCACTTAGTTGGTGCAGTGATTTGTCAGGTTTATTCCGGTAACGAACGAGACCTCGGCCTTGTAAATAGCTATGCTGCTTACAGGGACATTGGCGGCTACGCCAAGGAAGCTCGAGGCAATTGCAGATCTGGAATGCCCTTAGATGTCCTGGGTCGCACGCGTGCTACAATGACGCCACGACCGAGCTTGCATGATGAAAGTTATGCATAA	0	0	0	0	0	0	0	22	0	0	0	0	0	0
AAAACTTACCAGGTCAAGACATGGGCGTGATTGACAGGCTAATGACTTTTCTCGATTCCATGGATGGTGGTGCATGGTCGCACTTAGTTGGTGCAGTGATTTGTCAGGTTTATTCCGGTAACGAACGAGACCTCGGCCTTGTAAATAGCTATGCTGCTTACAGGGACATTGGCGGCTACGCCCAGGAAGCTCGAGGCAATTGCAGATCTGGAATGCCCTTAGATGTCCTGGGTCGCACGCGTGCTACAATGACGCCACGAACGAGCTTGCATGATGAAAGTTATGCATAA	0	0	0	0	13	0	0	7	0	0	0	0	0	0
AAATCTCACCAGGCCCGGACACCAGAAGGATTGACAGATTGATAGCTCTTTCTTGATTTGGTGGGTGGTGGTGCATGGCCGTTCTTAGTTGGTGGAGTGATTTGTCTGGTTAATTCCGATAACGAACGAGACTCTGTCCTGTTAAATAGATCCAACCTAGTCGTAGGGTTGGAATTTCTTCTTAGAGGGACTGGTGATTATTAGTCACACGAGATTGAGCAATAACAGGTCTGTGATGCCCTTAGATGTTCTGGGCCGCACACGCGCTACACTGAAGTGATCCGCTAGTT	0	0	0	0	0	0	0	0	0	0	0	15	0	0
AAATCTCACCCGGCCCGGACACTGTAAGGATTGACAGATTGAGAGCTCTTTCTTGATTCGGTGGGTGGTGGTGCATGGCCGTTCTTAGTTGGTGGAGCGATTTGTCTGGTTAATTCCGATAACGAACGAGACTCTAACCTGCTAAATAGTACGCCGATCTTTTGTCGGCGCGTACTTCTTAGAGGGACAGGTAGCGGTTAGCTACACGAAATTGAGCAATAACAGGTCTGTGATGCCCTTAGATGTTCGGGGCCGCACGCGCGCTACACTGAAGGGATAAGCGTGTTTTT	0	0	0	0	0	0	0	0	0	0	14	0	0	0
AAAACTTACCAGGTCAAGACATGGGCGTGATTGACAGGCTAATGACTTTTCTCGATTCCATGGATGGTGGTGCATGGTCGCACTTAGTTGGTGCAGTGATTTGTCAGGTTTATTCCGGTAACGAACGAGACCTCGGCCTTGTAAATAGCTATGCTGCTTACAGGGACATTGGCGGCTACGCCAAGGAAGCTCGAGGCAATTGCAGATCTGGAATGCCCTTAGATGTCCTGGGTCGCACGCGTGCTACAATGACGCCACGAACGAGCTTGCATGATGACAGTTATGCATAA	0	0	0	0	12	0	0	0	0	0	0	0	0	0
AAACCTTACTAGGGTAAGACATTGGTATGATTGACAGACTACTTGATCTTTCTTGATTTGGTGGGTGGTGGTGCATGGCCGATCTTAGTTGGTGGGGTGACCCGTCTGGTTAATTTCGATAACGAACGAGATCCGAGCTGTTTAGTTGGCCGTGCCAGGTTCGCCAGGTATGTGTCTCCTATATGGACTGTCAGTTTGAGGCTGAAGGAAGTTTCGGGCTAAATCAGGTCTGTGATGCCCTTAGACACTCTAGGCGGCACGCGCGCTACAATGGGCGGAAGAACGTGTTA	0	0	0	0	0	0	0	0	0	0	9	0	0	0
AAAACTCACCAGGTCCAGACATGGGAAGGATTGACAGATTGATAGCTCTTTCTTGATTCTATGGGTGGTGGTGCATGGCCGTTCTTAGTTGGTGGAGTGATTTGTCTGGTTAATTCCGTTAACGAACGAGACCGCCGCCTGCTAAATAGTTCTACTAATGGTTTTTCATTGGTAAGAGCTTCTTAGAGGGACGTTCATTCTACAATATGAAGGAAGATGGCGGCAATAACAGGTCTGTGATGCCCTTAGATGTCCTGGGCCGCACGCGCGTTACACTGATGCACTCCACG	0	0	9	0	0	0	0	0	0	0	0	0	0	0
AAAACTTACCAGGTCAAGACATGGGCGTGATTGACAGGCTAATGACTTTTCTCGATTCCATGGATGGTGGTGCATGGTCGCACTTAGTTGGTGCAGTGATTTGTCAGGTTTATTCCGGTAACGAACGAGACCTCGGCCTTGTAAATAGCTATGCTGCTTACAGGGACATTGGCGGCTACGCCAAGGAAGCTCGAGGCAATTGCAGATCTGGAATGCCCTTAGATGTCCTGGGTCGCACGCGTTCTACAATGACGCCACGAACGAGCTTGCATGATGAAAGTTATGCATAA	0	0	0	0	8	0	0	0	0	0	0	0	0	0
AAAACTTACCAGGTCAAGACATGGGCGTGATTGACAGGCTAATGACTTTTCTCGATTCCATGGAGGGTGGTGCATGGTCGCACTTAGTTGGTGCAGTGATTTGTCAGGTTTATTCCGGTAACGAACGAGACCTCGGCCTTGTAAATAGCTATGCTGCTTACAGGGACATTGGCGGCTACGCCAAGGAAGCTCGAGGCAATTGCAGATCTGGAATGCCCTTAGATGTCCTGGGTCGCACGCGTGCTACAATGACGCCACGAACGAGCTTGCATGATGAAAGTTATGCATAA	0	0	0	0	0	0	0	7	0	0	0	0	0	0
AAAACTTACCAGGTCAAGACATGGGCGTGATTGACAGGCTAATGACTTTTCTCGATTCCATGGATGGTGGTGCATGGTCGCACTTAGTTGGTGCAGTGATTTGTCAGGTTTATTCCGGTAACGAACGAGACCTCGGCCTTGTAAATAGCTATGCTGCTTACAGGGACATTGGCGGCTACGCCAAGGAAGCTCGAGGCAATTGCAGATCTGGAATGCCCTTAGATGTCCTGGGTCGCACGCGTGCTACAATTACGCCACGAACGAGCTTGCGTGATGAAAGTTACGCATAA	7	0	0	0	0	0	0	0	0	0	0	0	0	0
AAAACTTACCAGGTCAAGACATGGGCGTGATTGACAGGCTAATGACTTTTCTCGATTCCATGGATGGTGGTGCATGGTCGCACTTAGTTGGTGCAGTGATTTGTCAGGTTTATTCCGGTAACGAACGAGACCTCGGCCTTGTAAATAGCTATGCTGCTTACAGGGACATTGGCGGCTACGCCAAGGAAGCTCGAGGCAATTGCAGATCTGGAATGCCCTTAGATGTCCTGGGTCGCACGCGTGCTACCATGACGCCACGAACGAGCTTGCATGATGAAAGTTATGCATAA	0	0	0	7	0	0	0	0	0	0	0	0	0	0
GAAACTTACCAGGTCCAGACATAGTAAGGATTGACAGATTGATAGCTCTTTCTTGATTCTATGGGTGGTGGTGCATGGCCGTTCTTAGTTGGTGGAGTGATTTGTCTGGTTAATTCCGTTAACGAACGAGACCTTAACCTGCTAAATAGTTACATGTAACCTCGGTTACATGGGCAACTTCTTAGAGGGACTTTGCGTGTCTAACGCAAGGAAGTTTGAGGCAATAACAGGTCTGTGATGCCCTTAGCTGTCCTGGGCTGCACGCGCGCTACACTGATGCGCTCAACGAG	0	6	0	0	0	0	0	0	0	0	0	0	0	0

## Sheet: Illumina - Taxonomy
Sequence	Kingdom	Supergroup	Division	Class	Order	Family	Genus	Species
AAAACTTACCAGGTCAAGACATGGGCGTGATTGACAGGCTAATGACTTTTCTCGATTCCATGGATGGTGGTGCATGGTCGCACTTAGTTGGTGCAGTGATTTGTCAGGTTTATTCCGGTAACGAACGAGACCTCGGCCTTGTAAATAGCTATGCTGCTTACAGGGACATTGGCGGCTACGCCAAGGAAGCTCGAGGCAATTGCAGATCTGGAATGCCCTTAGATGTCCTGGGTCGCACGCGTGCTACAATGACGCCACGAACGAGCTTGCATGATGAAAGTTATGCATAA	Eukaryota	Alveolata	Ciliophora	Ciliophora_X	Ciliophora_XX	Ciliophora_XXX	Mesodinium	NA
AAATCTCACCAGGCCCGGACACCAGAAGGATTGACAGATTGATAGCTCTTTCTTGATTTGGTGGGTGGTGGTGCATGGCCGTTCTTAGTTGGTGGAGTGATTTGTCTGGTTAATTCCGATAACGAACGAGACTCTGTCCTGTTAAATAGATCCAACCTAGTCGTAGGGTTGGAATTTCTTCTTAGAGGGACTGGTGATTATTAGTCACACGAGATTGAGCAATAACAGGTCTGTGATGCCCTTAGATGTTCTTGGCCGCACACGCGCTACACTGAAGTGATCAGCTAGTT	Eukaryota	Opisthokonta	Metazoa	Arthropoda	Crustacea	Maxillopoda	Eurytemora	Eurytemora_affinis
GAAACTTACCAGGTCCAGACATAGTAAGGATTGACAGATTGATAGCTCTTTCTTGATTCTATGGGTGGTGGTGCATGGCCGTTCTTAGTTGGTGGAGTGATTTGTCTGGTTAATTCCGTTAACGAACGAGACCTTAACCTGCTAAATAGTTACATGTAACCTCGGTTACATGGGCAACTTCTTAGAGGGACTTTGCGTGTCTAACGCAAGGAAGTTTGAGGCAATAACAGGTCTGTGATGCCCTTAGATGTCCTGGGCTGCACGCGCGCTACACTGATGCGCTCAACGAG	Eukaryota	Alveolata	Dinoflagellata	Dinophyceae	Dinophyceae_X	Tovelliaceae	Woloszynskia	Woloszynskia_halophila
AAAACTTACCAGGTCAAGACATGGGCGTGATTGACAGGCTAATGACTTTTCTCGATTCCATGGATGGTGGTGCATGGTCGCACTTAGTTGGTGCAGTGATTTGTCAGGTTTATTCCGGTAACGAACGAGACCTCGGCCTTGTAAATAGCTATGCTGCTTACAGGGACATTGGCGGCTACGCCAAGGAAGCTCGAGGCAATTGCAGATCTGGAATGCCCTTAGATGTCCTGGGTCGCACGCGTGCTACAATGACGCCACGAACGAGCTTGCGTGATGAAAGTTACGCATAA	Eukaryota	Alveolata	Ciliophora	Ciliophora_X	Ciliophora_XX	Ciliophora_XXX	Mesodinium	Mesodinium_rubrum
AAATCTCACCAGGCCCGGACACCAGAAGGATTGACAGATTGATAGCTCTTTCTTGATTTGGTGGGTGGTGGTGCATGGCCGTTCTTAGTTGGTGGAGTGATTTGTCTGGTTAATTCCGATAACGAACGAGACTCTGTCCTGTTAAATAGATCCAACCTAGTCGTAGGGTTGGAATTTCTTCTTAGAGGGACTGGTGATTATTAGTCACACGAGATTGAGCAATAACAGGTCTGTGATGCCCTTAGATGTTCTGGGCCGCACACGCGCTACACTGAAGTGATCAGCTAGTT	Eukaryota	Opisthokonta	Metazoa	Arthropoda	Crustacea	Maxillopoda	Eurytemora	Eurytemora_affinis
AAAACTTACCAGGTCCAGACATAGTGAGGATTGACAGATTGAGAGTTCTTTCTTGATTCTATGGGTGGTGGTGCATGGCCGTTCTTAGTTGGTGGAGTGATTTGTCTGGTTAATTCCGTTAACGAACGAGACCGCCGCCTGCTAAATAGTTCTACTAATGGTTTTTCATTGGTAAGAGCTTCTTAGAGGGACGTTCATTCTACAAGATGAAGGAAGATGGCGGCAATAACAGGTCTGTGATGCCCTTAGATGTCCTGGGCCGCACGCGCGTTACACTGATGCACTCAACG	Eukaryota	Stramenopiles	Ochrophyta	Bacillariophyta	Bacillariophyta_X	Polar-centric-Mediophyceae	Shionodiscus	Shionodiscus_ritscheri
GAAACTTACCAGGTCCAGACATAGTAAGGATTGACAGATTGATAGCTCTTTCTTGATTCTGTGGGTGGTGGTGCATGGCCGTTCTTAGTTGGTGGAGTGATTTGTCTGGTTAATTCCGTTAACGAACGAGACCTTAGCCTACTAAATAGTCGGTGCAATCATGATTGTACCTACTTCTTAGAGGGACTTTGTAAGCAAATACAAGGAAGTTTGAGGCAATAACAGGTCTGTGATGCCCTTAGATGTCCTGGGCCGCACGCGTGCTACACTGACACATACATCGAGCATCT	Eukaryota	Alveolata	Ciliophora	Spirotrichea	Choreotrichida	Strobilidiidae_I	Pelagostrobilidium	Pelagostrobilidium_neptuni
AAAACTTACCAGGTCCAGACATAGTGAGGATTGACAGATTGAGAGTTCTTTCTTGATTCTATGGGTGGTGGTGCATGGCCGTTCTTAGTTGGTGGAGTGATTTGTCTGGTTAATTCCGTTAACGAACGAGACCGCCGCCTGCTAAATAGACCCGTTAATGGCTTTTCATTGGCGAGGTCTTCTTAGAGGGACGTTCATTCTACAAGATGAAGGAAGATGGCGGCAATAACAGGTCTGTGATGCCCTTAGATGTCCTGGGCCGCACGCGCGTTACACTGATGCACTCAACG	Eukaryota	Stramenopiles	Ochrophyta	Bacillariophyta	Bacillariophyta_X	Polar-centric-Mediophyceae	Skeletonema	Skeletonema_sp.
AAAACTTACCAGGTCAAGACATGGGCGTGATTGACAGGCTAATGACTTTTCTCGATTCCATGGATGGTGGTGCATGGTCGCACTTAGTTGGTGCAGTGATTTGTCAGGTTTATTCCGGTAACGAACGAGACCTCGGCCTTGTAAATAGCTATGCTGCTTACAGGGACATTGGTGGCTACACCAAGGAAGCTCGAGGCAATTGCAGATCTGGAATGCCCTTAGATGTCCTGGGTCGCACGCGTGCTACAATGACGCCACGAACGAGTTTGCGTGATGAAAGTCACGCATAA	Eukaryota	Alveolata	Ciliophora	Ciliophora_X	Ciliophora_XX	Ciliophora_XXX	Mesodinium	Mesodinium_rubrum
AAATCTCACCAGGCCCGGACACCAGAAGGATTGACAGATTGATAGCTCTTTCTTGATTTGGTGGGTGGTGGTGCATGGCCGTTCTTAGTTGGTGGAGTGATTTGTCTGGTTAATTCCGATAACGAACGAGACTCTGTCCTGCTAAATAGATGCAACCTTTCTTTTGGGTTGCAATTTCTTCTTAGAGGGACTGGCGATTATTAGTCGCACGAGATTGAGCAATAACAGGTCTGTGATGCCCTTAGATGTTCTGGGCCGCACACGCGCTACACTGAATTGATCAGCTAGTT	Eukaryota	Opisthokonta	Metazoa	Arthropoda	Crustacea	Maxillopoda	Limnocalanus	Limnocalanus_macrurus
AAAACTTATCAGGTCCAGACATAGTGAGGATTGACAGATTGAGAGCTCTTTCTTGATTCTATGGGTGGTGGTGCATGGCCGTTCTTAGTTGGTGGAGTGATTTGTCTGGTTAATTCCGTTAACGAACGAGACCTCAGCCTGCTAAATAATAGCGTTAATGATTTTCATTGGCGGCTGTTTCTTAGAGGGACATGGAGTATCAAACTCCAGGAAGATTGAGGCAATAACAGGTCTGTGATGCCCTTAGATGTTCTGAACCGCACGCGTGTTACACTGATGTGTTCAACGAG	Eukaryota	Stramenopiles	Ochrophyta	Bacillariophyta	Bacillariophyta_X	Polar-centric-Mediophyceae	Chaetoceros	NA
AAAACTTACCAGGTCCGGACATAGTGAGGATTGACAGATTGAAGATCTTTCTTGATTCTATGGGTGGTGGTGCATGGCCGTTCTTAGTTGGTGGAGTGATTTGTCTGGTTAATTCCGTTAACGAACGAGACCTCGACCTACTAAATAGTTTTGCGAATTCTTCGGGATTCGTGGAGACTTCTTAGAGGGACTTTGGATGAGTAGTCCAAGGAAGTTCGAGGCAATAACAGGTCTGTGATGCCCTTAGATGTTCTGGGCCGCACGCGCGCTACACTGACTGGTTCATCGAG	Eukaryota	Rhizaria	Cercozoa	Filosa-Thecofilosea	Cryomonadida	Protaspa-lineage	Protaspa-lineage_X	Protaspa-lineage_X_sp.
AAAACTTACCAGGTCCAGACATAGCTATGATTGACAGATTGAAGATCTTTCTTAATTCTATGGGTGGTGGTGCATGGCCGTTCTTAGTTGGTGGAGTGATTTGTCTGGTTAATTCCGTTAACGAACGAGACCTCGACCTGCTAAATAGTTTGGCGAATTCCCTGTGGATTCGTACATACTTCTTAGAGGGACTATCGGTTCGCAGCCGGTGGAAGTTCGAGGCAATAACAGGTCTGTGATGCCCTTAGATGTTCTGGGCCGCACGCGCGCTACACTGAGTACTTCATCGA	Eukaryota	Rhizaria	Cercozoa	Filosa-Thecofilosea	Ebriida	Botuliformidae	Botuliforma	Botuliforma_benthica
AAAACTTACCAGGTCCAGACATAGTGAGGATTGACAGATTGATAGCTCTTTCTTGATTCTATGGGTGGTGGTGCATGGCCGTTCTTAGTTGGTGGAGTGATTTGTCTGGTTAATTCCGTTAACGAACGAGACCTTAGCCTGCTAACTAGTCGCGGCGATCTCGATCGTCGTCGACTTCTTAGAGGGACTTTGTGGCACTAAACACAAGGAAGTTTGAGGCAATAACAGGTCTGTGATGCCCTTAGATGTCCTTGGCCGCACGCGTGCTACACTGACGCCTACAACGAGTA	Eukaryota	Alveolata	Ciliophora	Spirotrichea	Strombidiida	Strombidiidae_R	Strombidiidae_R_X	Strombidiidae_R_X_sp.
AAAACTTACCAGGTCCAGACATAGTTAGGATTGACAGATTGAGAGCTCTTTCTTGATTCTATGGGTGGTGGTGCATGGCCGTTCTTAGTTGGTGGAGTGATTTGTCTGGTTAATTCCGATAACGAACGAGACCTTAACCTGCTAAATAGTAGTCCGATGATTTCTTCATCGTGTCGACTTCTTAGAGGGACTATCGGTGTCTAACCGATGGAAGTTTGAGGCAATAACAGGTCTGTGATGCCCTTAGATGTTCTGGGCCGCACGCGCGCTACACTGATGAATTCAACGAG	Eukaryota	Hacrobia	Picozoa	Picozoa_X	Picozoa_XX	Picozoa_XXX	Picozoa_XXXX	Picozoa_XXXX_sp.
AAAACTTACCAGGTCCAGACATAGGAAGGATTGACAGATTGAGAGCTCTTTCTTGATTCTATGGGTGGTGGTGCATGGCCGTTCTTAGTTGGTGGAGTGATTTGTCTGGTTAATTCCGTTAACGAACGAGACCTTAACCTGCTAAATAGTTACGACGATACTCTGTATCGGCGGACAACTTCTTAGAGGGACTACTGGGGTTACACCCGGTGGAAGTTTGAGGCAATAACAGGTCTGTGATGCCCTTAGATGTTCTGGGCCGCACGCGCGCTACACTGACTGGATCAACG	Eukaryota	Hacrobia	Telonemia	Telonemia_X	Telonemia_XX	Telonemia-Group-1	Telonema-Group-1	Telonema_subtile
GAAACTTACCAGGTCCAGACATAGTGAGGATTGACAGATTGATAGCTCTTTCTTGATTCTATGGGTGGTGGTGCATGGCCGTTCTTAGTTGGTGGAGTGATTTGTCTGGTTAATTCCGTTAACGAACGAGACCTTAGCCTGCTAAATAGTCGCTCCAATCATGATTGGCTGCGACTTCTTAGAGGGACTTTGTAAGCAAATACAAGGAAGTTTGAGGCAATAACAGGTCTGTGATGCCCTTAGATGTCCTGGGCCGCACGCGTGCTACACTGACACATACAGCGAGTATC	Eukaryota	Alveolata	Ciliophora	Spirotrichea	Choreotrichida	Strobilidiidae_C	Strobilidiidae_C_X	Strobilidiidae_C_X_sp.
AAATCTCACCCGGCCCGGACACTGTAAGGATTGACAGATTGAGAGCTCTTTCTTGATTCGGTGGGTGGTGGTGCATGGCCGTTCTTAGTTGGTGGAGCGATTTGTCTGGTTAATTCCGATAACGAACGAGACTCTAGCCTGCTAAATAGTACGCCGATCTTTTGTCGGCGCGTACTTCTTAGAGGGACAAGTAGCGGTTAGCTACACGAAATTGAGCAATAACAGGTCTGTGATGCCCTTAGATGTTCGGGGCCGCACGCGCGCTACACTGAAGGGATAAGCGTGTTTTT	Eukaryota	Opisthokonta	Metazoa	Rotifera	Rotifera_X	Rotifera_XX	Brachionus	NA
AAAACTTACCAGGTCCAGACATAGTGAGGATTGACAGATTGAGAGCTCTTTCTTGATTCTATGGGTGGTGGTGCATGGCCGTTCTTAGTTGGTGGGTTGCCTTGTCAGGTTGATTCCGGTAACGAACGAGACCTCAGCCTGCTAAATAGTAATACCCGCTTTTTGCGAGTAGCTTACTTCTTAGAGGGACAGATGCTACAAAAGCATCGGAAGTATGAGGCAATAACAGGTCTGTGATGCCCTTAGATGTTCTGGGCCGCACGCGCGCTACACTGACGCATTCAACAAGC	Eukaryota	Archaeplastida	Chlorophyta	Chlorophyceae	Sphaeropleales	Sphaeropleales_X	NA	NA
GAAACTTACCAGGTCCAGACATAGTAAGGATTGACAGATTGAAAGCTCTTTCTTGATTCTATGGGTGGTGGTGCATGGCCGTTCTTAGTTGGTGGAGTGATTTGTCTGGTTAATTCCGTTAACGAACGAGACCTCAGCCTGCTAACTAGATTCGCCAATATGATTGGCGCATCTTCTTAGAGGGACTATTTGTGTTTAATGAATGGAAGTTTGAGGCAATAACAGGTCTGTGATGCCCTTAGATGTTCTGGGCCGCACGCGCGCTACACTGATGAACGCAACGAGACCAC	Eukaryota	Hacrobia	Cryptophyta	Cryptophyceae	Cryptomonadales	Cryptomonadales_X	Plagioselmis	Plagioselmis_nannoplanctica
AAATCTCACCAGGCCCGGACACCAGAAGGATTGACAGATTGATAGCTCTTTCTTGATTTGGTGGGTGGTGGTGCATGGCCGTTCTTAGTTGGTGGAGTGATTTGTCTGGTTAATTCCGATAACGAACGAGACTCTGTCCTGTTAAATAGATCCAACCTAGTCGTAGGGTTGGAATTTCTTCTTAGAGGGACTGGTGATTATTAGTCACACGAGATTGAGCAATAACAGGTCTGTGATGCCCTTAGATGTTCTTGGCCGCACACGCGCTACACTTAAGTGATCAGCTAGTT	Eukaryota	Opisthokonta	Metazoa	Arthropoda	Crustacea	Maxillopoda	Eurytemora	Eurytemora_affinis
GAAACTTACCAGGTCCAGACATAGTGAGGATTGACAGATTGATAGCTCTTTCTTGATTCTATGGGTGGTGGTGCATGGCCGTTCTTAGTTGGTGGAGTGATTTGTCTGGTTAATTCCGTTAACGAACGAGACCTTAGCCTACTAAATAGTCGTTTCAACACGGTTGACAATGACTTCTTAGAGGGACTTTGTACTAAATACAAGGAAGTTTGAGGCAATAACAGGTCTGTGATGCCCTTAGATGTCCTGGGCCGCACGCGTGCTACACTGACGCATACAGCGAGTATCTC	Eukaryota	Alveolata	Ciliophora	Spirotrichea	Tintinnida	Tintinnidiidae	Tintinnidium	Tintinnidium_sp.
AAAACTTACCAGGTCCAGACATAGTGAGGATTGACAGATTGAGAGCTCTTTCTTGATTCTATGGGTGGTGGTGCATGGCCGTTCTTAGTTGGTGGAGTGATTTGTCTGGTTAATTCCGTTAACGAACGAGACCCCCGCCTGCTAAATAGTTGAGCGAATGCCTAGCATTGGCGTCAACTTCTTAGAGGGACTTTTGGTGACTAACCAAAGGAAGTTGGGGGCAATAACAGGTCTGTGATGCCCTTAGATGTCCTGGGCCGCACGCGCGCTACAATGATACACGCAACGAG	Eukaryota	Stramenopiles	Ochrophyta	Chrysophyceae	Chrysophyceae_X	Chrysophyceae_Clade-F	Paraphysomonas	NA
AAAACTTACCAGGTCCGGACATAGTAAGGATTGACAGATTGAAGATCTTTCTTGATTCTATGGGTGGTGGTGCATGGCCGTTCTTAGTTGGTGGAGTGATTTGTCTGGTTAATTCCGTTAACGAACGAGACCTCGACCTGCTAAATAGCTTGCCCGTGTTTACACGAGGTATTAGCTTCTTAGAGGGACTTTGGCTTTGAAGGCTACAGGAAGTTCGAGGCAATAACAGGTCTGTGATGCCCTTAGATGTTCTGGGCCGCACGCGCGCTACACTGACATGTTCATCGAGA	Eukaryota	Rhizaria	Cercozoa	Filosa-Imbricatea	Filosa-Imbricatea_X	Novel-clade-2	Novel-clade-2_X	Novel-clade-2_X_sp.
AAAACTTACCAGGTCAAGACATGGGCGTGATTGACAGGCTAATGACCTTTCTCGATTCCTTGGATGGTGGTGCATGGTCGCACTTAGTTGGTGCAGTGATTTGTCAGGTTTATTCCGGTAACGAACGAGACCTCGGCCTTGTAACTAGCTACGCTGCTTACAGGGACAATGACGGCTACGTCAAGGAAGTTCGAGGCAATTGCAGATCTGGAATGCCCTTAGATGTCCTGGGTCGCACGCGTGCTACAATGACGCCACGAACGAGTCCACGTGATGAAAGTCACGTGAAA	Eukaryota	Alveolata	Ciliophora	Ciliophora_X	Ciliophora_XX	Ciliophora_XXX	Mesodinium	Mesodinium_pulex
AAAACTTACCAGGTCAAGACATGGGCGTGATTGACAGGCTAATGACCTTTCTCGATTCCTTGGATGGTGGTGCATGGTCGCACTTAGTTGGTGCAGTGATTTGTCAGGTTTATTCCGGTAACGAACGAGACCTCGGCCTTGTAAATAGTTTAACTGCTTACAGGGACAATGTCGGCTACGTCAAGGAAGTTCGAGGCAATTGCAGATCTGGAATGCCCTTAGATGTCCTGGGTCGCACGCGTGCTACAATGACGCCACGAACGAGTTCATGTGATGAAAGTCACGTGAAA	Eukaryota	Alveolata	Ciliophora	Ciliophora_X	Ciliophora_XX	Ciliophora_XXX	Mesodinium	Mesodinium_pulex
AAAACTTACCAGGTCCAGACATAGTGAGGATTGACAGATTGAGAGTTCTTTCTTGATTCTATGGGTGGTGGTGCATGGCCGTTCTTAGTTGGTGGAGTGATTTGTCTGGTTAATTCCGTTAACGAACGAGACCGCCGCCTGCTAAATAGACCCGCGAATGGCTTTTCATTGGCGAGGTCTTCTTAGAGGGACGTTCATTCTACAAGATGAAGGAAGATGGCGGCAATAACAGGTCTGTGATGCCCTTAGATGTCCTGGGCCGCACGCGCGTTACACTGATGCACTCAACG	Eukaryota	Stramenopiles	Ochrophyta	Bacillariophyta	Bacillariophyta_X	Polar-centric-Mediophyceae	Skeletonema	Skeletonema_marinoi
GAAACTTACCAGGTCCAGACATAGTGAGGATTGACAGATTGAGAGCTCTTTCTTGATTCTATGGGTGGTGGTGCATGGCCGTTCTTAGTTGGTGGAGTGATTTGTCTGGTTAATTCCGTTAACGAACGAGACCCCCGCCTGCTAAATAATTCTGCTAATGTTTTTTCATTGGTATTGAGTTTCTTAGAGGGACTTTCGGTGACTAACTGAAGGAAGTTGGGGGCAATAACAGGTCTGTGATGCCCTTAGATGTCCTGGGCCGCACGCGCGCTACACTGATGCATTCAGCA	Eukaryota	Stramenopiles	Ochrophyta	Bacillariophyta	Bacillariophyta_X	Radial-centric-basal-Coscinodiscophyceae	Radial-centric-basal-Coscinodiscophyceae_X	Radial-centric-basal-Coscinodiscophyceae_X_sp.
GAAACTTACCAGGTCCAGACATAGTGAGGATTGACAGATTGATAGCTCTTTCTTGATTCTATGGGTGGTGGTGCATGGCCGTTCTTAGTTGGTGGAGTGATTTGTCTGGTTAATTCCGTTAACGAACGAGACCTTAGCCTACTAAATAGTCGTTACAATCATGATTGTCTACGACTTCTTAGAGGGACTTTGTAAGCAAATACAAGGAAGTTTGAGGCAATAACAGGTCTGTGATGCCCTTAGATGTCCTGGGCCGCACGCGTGCTACACTGACGCATACAACAAGTATT	Eukaryota	Alveolata	Ciliophora	Spirotrichea	Choreotrichida	Strobilidiidae_A	Rimostrombidium_A	Rimostrombidium_A_sp.
AAAACTTACCAGGTCCAGACATAGTAAGGATTGACAGATTGATAGCTCTTTCTTGATTCTATGGGTGGTGGTGCATGGCCGTTCTTAGTTGGTGGAGTGATTTGTCTGGTTAATTCCGTTAACGAACGAGACCTCAGCCTGCTAAATAGTTGTACACTACTCTTAGTGCAGCAACTTCTTAGAGGGACTATGTGCGTTTAGCACATGGAAGTTTGAGGCAATAACAGGTCTGTGATGCCCTTAGATGTTCTGGGCCGCACGCGCGCTACACTGACGAATGCAACGAGCTT	Eukaryota	Archaeplastida	Chlorophyta	Mamiellophyceae	Mamiellales	Mamiellaceae	Micromonas	Micromonas_polaris
AAAACTTACCAGGTCCAGACATAGTGAGGATTGACAGATTGAGAGCTCTTTCTTGATTCTATGGGTGGTGGTGCATGGCCGTTCTTAGTTGGTGGAGTGATTTGTCTGGTTAATTCCGTTAACGAACGAGACCCCTGCCTGCTAAATAGCACGTGTAGTGTTTATCACTGCATTTGTGCTTCTTAGAGGGACGTGCGTTCTATTAGACGCAGGAAGATAGGGGCAATAACAGGTCTGTGATGCCCTTAGATGTTCTGGGCCGCACGCGCGCTACACTGATGCATTCAACG	Eukaryota	Stramenopiles	Ochrophyta	Bacillariophyta	Bacillariophyta_X	Raphid-pennate	Fragilariopsis	Fragilariopsis_cylindrus
AAAACTTATCAGGTCCAGACATAGTGAGGATTGACAGATTGAGAGCTCTTTCTTGATTCTATGGGTGGTGGTGCATGGCCGTTCTTAGTTGGTGGAGTGATTTGTCTGGTTAATTCCGTTAACGAACGAGACCCCAGCCTGCTAAATAATCACGCTAATGATTTTTCATTGACGATGGTTTCTTAGAGGGACATGTAGTATAAAACTACAGGAAGATTGGGGCAATAACAGGTCTGTGATGCCCTTAGATGTTCTGAACCGCACGCGTGTTACACTGATGCATTCAACGA	Eukaryota	Stramenopiles	Ochrophyta	Bacillariophyta	Bacillariophyta_X	Polar-centric-Mediophyceae	Chaetoceros	Chaetoceros_neogracilis
AAAACTTACCAGGTCCAGACATAGTGAGGATTGACAGATTGAAGATCTTTCTTGATTCTATGGGTGGTGGTGCATGGCCGTTCTTAGTTGGTGGAGTGATTTGTCTGGTTAATTCCGTTAACGAACGAGACCCCGACCTGCTAAATAGAGCGACTAATCCTTGTGATTGGTCGGTACTTCTTAGAGGGACTGTTGGTGCCTAGCCAATGGAAGTTCGGGGCAATAACAGGTCTGTGATGCCCTTAGATGTTCTGGGCCGCACGCGCGCTACACTGATGAGTTCATCGAGC	Eukaryota	Rhizaria	Cercozoa	NA	NA	NA	NA	NA
GAAACTTACCAGGTCCAGACATAGTAAGGATTGACAGATTGAGAGCTCTTTCTTGATTCTATGGGTGGTGGTGCATGGCCGTTCTTAGTTGGTGGAGTGATTTGTCTGGTTAATTCCGTTAACGAACGAGACCCCCGCCTGCTAAATAGTACTGGGAATGCTTAGCATTGCCAGAGACTTCTTAGAGGGACTTTCGGCGCTAGGCCGAAGGAAGTTGGGGGCAATAACAGGTCTGTGATGCCCTTAGATGTCCTGGGCCGCACGCGCGCTACACTGATGCGTTCAACGAG	Eukaryota	Stramenopiles	Ochrophyta	Eustigmatophyceae	Eustigmatophyceae_X	Eustigmatophyceae_XX	Nannochloropsis	Nannochloropsis_oceanica
GAAACTTACCAGGTCCAGACATAGTAAGGATTGACAGATTGAGAGCTCTTTCTTGATTCTATGGGTGGTGGTGCATGGCCGTTCTTAGTTGGTGGAGTGATTTGTCTGGTTAATTCCGTTAACGAACGAGACCCCCGCCTGCTAAATAGCGCGCGGTATGCTTGCATATCGTGCTCGCTTCTTAGAGGGACTTTGTGTGACTAACACAAGGAAGTTGGGGGCAATAACAGGTCTGTGATGCCCTTAGATGTTCTGGGCCGCACGCGCGCTACACTGATGCATGCAACGAG	Eukaryota	Stramenopiles	Ochrophyta	Dictyochophyceae	Dictyochophyceae_X	Pedinellales	Pseudopedinella	Pseudopedinella_sp.
AAAACTTATCAGGTCCAGACATAGTGAGGATTGACAGATTGAGAGCTCTTTCTTGATTCTATGGGTGGTGGTGCATGGCCGTTCTTAGTTGGTGGAGTGATTTGTCTGGTTAATTCCGTTAACGAACGAGACCCCAGCCTGCTAAATAATCACAGTAATGATTTTTCATTGTTGATTGGTTTCTTAGAGGGACATGGAGTATAAAACTCCAGGAAGATTGGGGCAATAACAGGTCTGTGATGCCCTTAGATGTTCTGAACCGCACGCGTGTTACACTGACGTATTCAACG	Eukaryota	Stramenopiles	Ochrophyta	Bacillariophyta	Bacillariophyta_X	Polar-centric-Mediophyceae	Chaetoceros	Chaetoceros_neogracilis
AAATCTCACCAGGCCCGGACACCAGAAGGATTGACAGATTGATAGCTCTTTCTTGATTTGGTGGGTGGTGGTGCATGGCCGTTCTTAGTTGGTGGAGTGATTTGTCTGGTTAATTCCGATAACGAACGAGACTCTGTCCTGTTAAATAGATCCAACCTAGTCGTAGGGTTGGAATTTCTTCTTAGAGGGACTGGTGATTATTAGTCACACGAGATTGAGCAATAACAGGTCTGTGATGCCCTTAGATGTTCTGGGCCGCACACGCGCTACACTGCAGTGATCAGCTAGTT	Eukaryota	Opisthokonta	Metazoa	Arthropoda	Crustacea	Maxillopoda	Eurytemora	Eurytemora_affinis
AAAACTTACCAGGTCCAGACATAGTGAGGATTGACAGATTGATAGCTCTTTCTTGATTCTATGGGTGGTGGTGCATGGCCGTTCTTAGTTGGTGGAGTGATTTGTCTGGTTAATTCCGTTAACGAACGAGACCTTAGCCTGCTAACTAGTCGCGGCGATCTCGATCGTCGTCGGCTTCTTAGAGGGACTTTGTGGCACTAAACACAAGGAAGTTTGAGGCAATAACAGGTCTGTGATGCCCTTAGATGTCCTGGGCCGCACGCGTGCTACACTGACGCCTACAGCGAGTA	Eukaryota	Alveolata	Ciliophora	Spirotrichea	Strombidiida_G	Strombidiida_G_X	Strombidiida_G_XX	Strombidiida_G_XX_sp.
AAAACTTACCAGGTCAAGACATGGGCGTGATTGACAGGCTGATGACCTTTCTCGATTCCTTGGATGGTGGTGCATGGTCGCACTTAGTTGGTGCAGTGATTTGTCAGGTTTATTCCGGTAACGAACGAGACCTCGGCCTTGTAACTAGTTTACTGCTTACAGGGACAATGTCGGCTACGTCAAGGAAGTTCGAGGCAATTGCAGATCTGGAATGCCCTTAGATGTCCTGGGTCGCACGCGTGCTACAATGACGCCACGAGCGAGTGTGCGTGACGGAACTCACGTGAAAT	Eukaryota	Alveolata	Ciliophora	Ciliophora_X	Ciliophora_XX	Ciliophora_XXX	Mesodinium	Mesodinium_pulex
AAAACTTACCAGGTCCGGACATAGTGAGGATTGACAGATTGAAGATCTTTCTTGATTCTATGGGTGGTGGTGCATGGCCGTTCTTAGTTGGTGGAGTGATTTGTCTGGTTAATTCCGTTAACGAACGAGACCTCGACCTGCTAAATAGTTCGGCAAATTCTTCGGGATTTGTACGTGACTTCTTAGAGGGACTATCGGTGGTTAGCCGATGGAAGTTCGAGGCAATAACAGGTCTGTGATGCCCTTAGATGTTCTGGGCCGCACGCGCGCTACACTGATTGGTTCATCGA	Eukaryota	Rhizaria	Cercozoa	Filosa-Thecofilosea	Cryomonadida	Cryothecomonas-lineage	Cryothecomonas	Cryothecomonas_aestivalis
AAAACTTACCAGGTCCAGACATAGTGAGGATTGACAGATTGAAGATCTTTCTTGATTCTATGGGTGGTGGTGCATGGCCGTTCTTAGTTGGTGGAGTGATTTGTCTGGTTAATTCCGTTAACGAACGAGACCTCGACCTGCTAAATAGTTTGGCGAACCCTTCGGGGTTCGTACATGACTTCTTAGAGGGACTATCGGTGTGTAGCCGATGGAAGTTCGAGGCAATAACAGGTCTGTGATGCCCTTAGATGTTCTGGGCCGCACGCGCGCTACACTGATGCGTTCATCGA	Eukaryota	Rhizaria	Cercozoa	Filosa-Thecofilosea	Ventricleftida	NA	NA	NA
AAAACTTACCAGGTCCAGACATAGTGAGGATTGACAGATTGATAGCTCTTTCTTGATTCTATGGGTGGTGGTGCATGGCCGTTCTTAGTTGGTGGAGTGATTTGTCTGGTTAATTCCGTTAACGAACGAGACCTTAGCCTGCTAACTAGTCGCGGCGATCTCGATCGTCGTCGACTTCTTAGAGGGACTTTGTGGCACTAAACACAAGGAAGTTTGAGGCAATAACAGGTCTGTGATGCCCTTAGATGTCCTGGGCCGCACGCGTGCTACACTGACGCCTACAGCGAGTA	Eukaryota	Alveolata	Ciliophora	Spirotrichea	Strombidiida	Strombidiidae_R	NA	NA
GAAACTTACCAGGTCCAGACATAGTAAGGATTGACAGATTGATAGCTCTTTCTTGATTCTATGGGTGGTGGTGCATGGCCGTTCTTAGTTGGTGGAGTGATTTGTCTGGTTAATTCCGATAACGAACGAGACCTTAACCTGCTAACTAGATATGCTCATTATATGGGTACAATCTTCTTAGAGGGACTATGTTTTGATAAATGCATGGAAGTTTGAGGCAATAACAGGTCTGTGATGCCCTTATATGTCCTGGGCTGCACGCGTGCTACACTGATGCATACAACAAGTAT	Eukaryota	Alveolata	Ciliophora	Litostomatea	Haptoria_4	Didiniidae	Didiniidae_X	Didiniidae_X_sp.
AAAACTTACCAGGTCCGGACATAGTGAGGATTGACAGATTGAAGATCTTTCTTGATTCTATGGGTGGTGGTGCATGGCCGTTCTTAGTTGGTGGAGTGATTTGTCTGGTTAATTCCGTTAACGAACGAGACCTCGACCTACTAAATAGTTTAGCGAACTCTTCGGGGTTCGTGTGGACTTCTTAGAGGGACTTTAGATGAGTAGTCTAAGGAAGTTCGAGGCAATAACAGGTCTGTGATGCCCTTAGATGTTCTGGGCCGCACGCGCGCTACACTGACTGGTTCATCGAG	Eukaryota	Rhizaria	Cercozoa	Filosa-Thecofilosea	Cryomonadida	Rhogostoma-lineage	NA	NA
AAAACTTACCAGGTCCAGACATAGTGAGGATTGACAGATTGAGAGCTCTTTCTTGATTCTATGGGTGGTGGTGCATGGCCGTTCTTAGTTGGTGGAGTGATTTGTCTGGTTAATTCCGTTAACGAACGAGACCCCCGCCTGCTAAATAGATGCCATTATTCTTTGTAATAATGTTCGCATCTTCTTAGAGGGACTTTCGGTGACTAACCGAAGGAAGTTGGGGGCAATAACAGGTCTGTGATGCCCTTAGATGTTCTGGGCCGCACGCGCGCTACACTGACACACGCAAC	Eukaryota	Stramenopiles	Ochrophyta	Chrysophyceae	Chrysophyceae_X	NA	NA	NA
GAAACTTACCAGGTCCAGACATAGTGAGGATTGACAGATTGATAGCTCTTTCTTGATTCTATGGGTGGTGGTGCATGGCCGTTCTTAGTTGGTGGAGTGATTTGTCTGGTTAATTCCGTTAACGAACGAGACCTTAGCCTACTAAATAGTTACCTCAATTACAATTGTTGTAACTTCTTAGAGGGACTTTGTAAGCAAATACAAGGAAGTTTGAGGCAATAACAGGTCTGTGATGCCCTTAGATGTCCTGGGCCGCACGCGTGCTACACTGACACATACAGCGAGTTCAC	Eukaryota	Alveolata	Ciliophora	Spirotrichea	Choreotrichida	Strobilidiidae_D	Rimostrombidium_D	Rimostrombidium_D_sp.
AAAACTTACCAGGTCCGGACATAGTGAGGATTGACAGATTGAAGATCTTTCTTGATTCTATGGGTGGTGGTGCATGGCCGTTCTTAGTTGGTGGAGTGATTTGTCTGGTTAATTCCGTTAACGAACGAGACCTCGACCTGCTAAATAGTTCGACAAATTCTTCGGGATTTGTACGTGACTTCTTAGAGGGACTATCGGTGGGTAGCCGATGGAAGTTCGAGGCAATAACAGGTCTGTGATGCCCTTAGATGTTCTGGGCCGCACGCGCGCTACACTGACTAGTTCATCGA	Eukaryota	Rhizaria	Cercozoa	Filosa-Thecofilosea	Cryomonadida	Cryothecomonas-lineage	Cryothecomonas	Cryothecomonas_aestivalis
GAAACTTACCAGGTCCAGACATAGTAAGGATTGACAGATTGAGAGCTCTTTCTTGATTCTATGGGTGGTGGTGCATGGCCGTTCTTAGTTGGTGGAGTGATTTGTCTGGTTAATTCCGTTAACGAACGAGACCTTAACCTACTAAATAGTTACACAAACTTTGGTTTGTGGATATACTTCTTAGAGGGACTATTCGTGCTAGTGAATGGAAGTTTGAGGCAATAACAGGTCTGTGATGCCCTTAGATGTTCTGGGCCGCACGCGCGCTACACTGATGAAAGCAACAAGTT	Eukaryota	Hacrobia	Katablepharidophyta	Katablepharidaceae	Katablepharidales	Katablepharidales_X	Katablepharidales_XX	Katablepharidales_XX_sp.
AAAACTTACCAGGTCCAGACATAGTGAGGATTGACAGATTGAGAGTTCTTTCTTGATTCTATGGGTGGTGGTGCATGGCCGTTCTTAGTTGGTGGAGTGATTTGTCTGGTTAATTCCGTTAACGAACGAGACCGCCGCCTGCTAAATAGCTCTGCTAATGGATTTTCATTGGTAAGAGCTTCTTAGAGGGACGTTCATTCTACAAGATGAAGGAAGATGGCGGCAATAACAGGTCTGTGATGCCCTTAGATGTCCTGGGCCGCACGCGCGCTACACTGATGCACTCAACG	Eukaryota	Stramenopiles	Ochrophyta	Bacillariophyta	Bacillariophyta_X	Polar-centric-Mediophyceae	Thalassiosira	Thalassiosira_nordenskioeldii
AAAACTTACCAGGTCCAGACATAGTGAGGATTGACAGATTGAGAGCTCTTTCTTGATTCTATGGGTGGTGGTGCATGGCCGTTCTTAGTTGGTGGGTTGCCTTGTCAGGTTGATTCCGGTAACGAACGAGACCTCAGCCTGCTAAATAGTCCGGCTTGGTTCTTCCAGGTCGCTGACTTCTTAGAGGGACTCTCGGCGACTAGCCGATGGAAGTGTGAGGCGATAACAGGTCTGTGATGCCCTTAGATGTTCTGGGCCGCACGCGCGCTACACTGATGCAATCAACGAGC	Eukaryota	Archaeplastida	Chlorophyta	Trebouxiophyceae	Trebouxiophyceae_X	Trebouxiophyceae_XX	Choricystis	Choricystis_minor
AAAACTTACCAGGTCCAGACATAGTGAGGATTGACAGATTGAGAGCTCTTTCTTGATTCTATGGGTGGTGGTGCATGGCCGTTCTTAGTTGGTGGGTTGCCTTGTCAGGTTGATTCCGGTAACGAACGAGACCTCAGCCTGCTAACTAGTCACGCCTTCTCCGGAAGGCGGCGGACTTCTTAGAGGGACTATTGGCGATTAGCCAATGGAAGCATGAGGCAATAACAGGTCTGTGATGCCCTTAGATGTTCTGGGCCGCACGCGCGCTACACTGATGCATTCAACGAGCC	Eukaryota	Archaeplastida	Chlorophyta	Trebouxiophyceae	Chlorellales	Chlorellales_X	Nannochloris	Nannochloris_sp.
GAAACTTACCAGGTCCAGACATAGTGAGGATTGACAGATTGAAGATCTTTCTTGATTCTATGGGTGGTGGTGCATGGCCGTTCTTAGTTGGTGGAGTGATTTGTCTGGTTAATTCCGTTAACGAACGAGACCTCGACCTGCTAAATAGTTCGGCGAACCTTTCGGGGTTCGTGCGTGACTTCTTAGAGGGACTATCGGTGTGTAGCCGGTGGAAGTTCGAGGCAATAACAGGTCTGTGATGCCCTTAGATGTTCTGGGCCGCACGCGCGCTACACTGATTCGTTCATCGA	Eukaryota	Rhizaria	Cercozoa	Filosa-Thecofilosea	Ventricleftida	Ventricleftida_X	Ventricleftida_XX	Ventricleftida_XX_sp.
GAAACTTACCAGGTCCAGACATTGTGAGGATTGACAGATTGAGAGCTCTTTCTTGATTCGATGGGTGGTGGTGCATGGCCGTTCTTAGTTGGTGGAGTGATTTGTCTGGTTAATTCCGTTAACGAACGAGACCGCAGCCTGCTAAATAGTGGCGCGAACCCTCCGTTCGCGCGCGCTTCTTAGAGGGACAACTTGTTTTCAACAAGTGGAAGTTCGCGGCAATAACAGGTCTGTGATGCCCTTAGATGTTCTGGGCCGCACGCGCGCTACACTGATGCATTCAACGAGTC	Eukaryota	Hacrobia	Haptophyta	Prymnesiophyceae	Isochrysidales	Prymnesiophyceae_Clade_C1	Prymnesiophyceae_Clade_C1_X	Prymnesiophyceae_Clade_C1_X_sp.
GAAACTCACCAGGTCCAGACATGGGAAGGATTGACAGATTGAGAGCTCTTTCTTGATTCTATGGGTGGTGGTGCATGGCCGTTCTTAGTTGGTGGAGTGATTTGTCTGGTTAATTCCGTTAACGAACGAGACCTCAGCCTGCTAACTAGTCACAGTAGTCTTGACTGCTGGCCGGCTTCTTAGAGGGACTGATCGAGTTTATCGATCGGAAGTTTGAGGCAATAACAGGTCTGTGATGCCCTTAGATGTTCTGGGCCGCACGCGCGCTACACTGATGACTCCAACGAGCA	Eukaryota	Hacrobia	Cryptophyta	Cryptophyceae	Cryptophyceae_X	Basal_Cryptophyceae-2	Basal_Cryptophyceae-2_X	Basal_Cryptophyceae-2_X_sp.
AAAACTTACCAGGTCCGGACATAGTGAGGATTGACAGATTGAAGATCTTTCTTGATTCTATGGGTGGTGGTGCATGGCCGTTCTTAGTTGGTGGAGTGATTTGTCTGGTTAATTCCGTTAACGAACGAGACCTTAGCCTACTAAATAGTCGTAACAATATTCATTGGCTGCGACTTCTTAGAGGGACTTTGCAAGCAACTGCAAGGAAGTTTGAGGCAATAACAGGTCTGTGATGCCCTTAGATGTCCTGGGCCGCACGCGTGCTACACTGACGCATACAGCGAGTATCA	Eukaryota	Alveolata	Ciliophora	Spirotrichea	Tintinnida	TIN_09	Tintinnopsis_09	Tintinnopsis_urnula
GAAACTTACCAGGTCCAGACATAGTGAGGATTGACAGATTGATAGCTCTTTCTTGATTCTATGGGTGGTGGTGCATGGCCGTTCTTAGTTGGTGGAGTGATTTGTCTGGTTAATTCCGTTAACGAACGAGACCCCCGCCTGCTAAATAGTTATATCAATGCTTAGCATTGGTATTAGCTTCTTAGAGGGACTTTTGGTGACTAACCAAAGGAAGTTGGGGGCAATAACAGGTCTGTGATGCCCTTAGATGTCCTGGGCCGCACGCGCGCTACACTGACACACGCAGCGAG	Eukaryota	Stramenopiles	Ochrophyta	Chrysophyceae	Chrysophyceae_X	NA	NA	NA
AAAACTTACCAGGTCCAGACGTAGTGAGGATTGACAGATTGATAGCTCTTTCTTGATTCTGCGGGTGGTGGTGCATGGCCGTTCTTAGTTGGTGGAGTGATTTGTCTGGTTAATTCCGTTAACGAACGAGACCTTAGCCTGCTAACTAGTCGCGGCGATCTCGATCGGCCGCCGGCTTCTTAGAGGGACTTTGTGGCTCTAAACACAAGGAAGTTTGAGGCAATAACAGGTCTGTGATGCCCTTAGATGTCCTGGGCCGCACGCGTGCTACACTGACGCCTACAACGAGT	Eukaryota	Alveolata	Ciliophora	Spirotrichea	Strombidiida	NA	NA	NA
AAAACTTACCAGGTCCAGACATAGTGAGGATTGACAGATTGATAGCTCTTTCTTGATTCTATGGGTGGTGGTGCATGGCCGTTCTTAGTTGGTGGAGTGATTTGTCTGGTTAATTCCGTTAACGAACGAGACCTTAGCCTGCTAACTAGTCGCTGTTATCTCGATAATAGTCGGCTTCTTAGAGGGACTTTGTGAATCAAACACAAGGAAGTTTGAGGCAATAACAGGTCTGTGATGCCCTTAGATGTCCTGGGCCGCACGCGTGCTACACTGACGCCTACAGCGAGTAC	Eukaryota	Alveolata	Ciliophora	Spirotrichea	Strombidiida_B	Strombidiida_B_X	Strombidiida_B_XX	Strombidiida_B_XX_sp.
TACGGAGGATGCAAGCGTTATCCGGATTTATTGGGTTTAAAGGGTCCGTAGGCGGATCTTTAAGTCAGTGGTGAAAGCCCACAGCTCAACTGTGGAACTGCCATTGATACTGGAGATCTTGAGTGTAGTAGAAGTAGGCGGAATAGGGCATGTAGCGGTGAAATGCATAGATATGCCCTAGAACACCGATTGCGAAGGCAGCTTACTATGTTACAACTGACGCTGAGGGACGAAAGCGTGGGGAGCAAACAGGATTAGAAACCCTAGTAGTCCGGCTGACTGACTCCAGT	Eukaryota	NA	NA	NA	NA	NA	NA	NA
AAAACTTACCAGGTCCGGACATAGTGAGGATTGACAGATTGAAGATCTTTCTTGATTCTATGGGTGGTGGTGCATGGCCGTTCTTAGTTGGTGGAGTGATTTGTCTGGTTAATTCCGTTAACGAACGAGACCTCGACCTGCTAAATAGTTCGGCAAATTCTTCGGGATTTGTACGTGACTTCTTAGAGGGACTATCGGTGGTTAGCCGATGGAAGTTCGAGGCAATAACAGGTCTGTGATGCCCTTAGATGTTCTGGGCCGCACGCGCGCTACACTGACTGGTTCATCGA	Eukaryota	Rhizaria	Cercozoa	Filosa-Thecofilosea	Cryomonadida	Cryothecomonas-lineage	Cryothecomonas	Cryothecomonas_aestivalis
AAATCTCACCAGGCCCGGACACTGGAAGGATTGACAGATTGAGAGCTCTTTCTCGATTCGGTGGGTGGTGGTGCATGGCCGTTCTTAGTTGGTGGAGTGATTTGTCTGGTTAATTCCGATAACGAACGAGACTCTGTCCTGCTAAATAGTTTCAGCGTCTTTTTGCGCTGAAAATTCTTCTTAGAGGGACTGGCGGCGTCTAGCCGCACGAGATTGAGCAATAACAGGTCTGTGATGCCCTTAGATGTTCTGGGCCGCACGCGCGCTACACTGAAGGGATCAGCGTGTTT	Eukaryota	Opisthokonta	Metazoa	Arthropoda	Crustacea	Maxillopoda	NA	NA
AAAACTTACCAGGTCCAGACATAGTGAGGATTGACAGATTGAGAGCTCTTTCTTGATTCTATGGGTGGTGGTGCATGGCCGTTCTTAGTTGGTGGGTTGCCTTGTCAGGTTGATTCCGGTAACGAACGAGACCTCAGCCTGCTAAATAGTCACGGTCGCTCCGGCGGCTGGCGGACTTCTTAGAGGGACTAATGGCGACTAGCCATTGGAAGCATGAGGCAATAACAGGTCTGTGATGCCCTTAGATGTTCTTGGCCGCACGCGCGCTACACTGATGCATTCAACGAGCC	Eukaryota	Archaeplastida	Chlorophyta	Trebouxiophyceae	Chlorellales	Chlorellales_X	NA	NA
GAAACTTACCAGGTCCAGACATAGTAAGGATTGACAGATTGAGAGCTCTTTCTTGATTCTATGGGTGGTGGTGCATGGCCGTTCTTAGTTGGTGGAGTGATTTGTCTGGTTAATTCCGTTAACGAACGAGACCTCAGCCTACTAAATAGTCCTACAAATTCTGAATTTGTAGCGGACTTCTTAGAGGGACTATTGGCGTTTAGCCAATGGAAGTTTGAGGCAATAACAGGTCTGTGATGCCCTTAGATGTTCTGGGCCGCACGCGCGCTACACTGATGAATTCAACGAGC	Eukaryota	Archaeplastida	Chlorophyta	Pyramimonadales	Pyramimonadales_X	Pyramimonadales_XX	Pyramimonas	Pyramimonas_disomata
AAAACTTACCAGGTCCAGACATAGTAAGGATTGACAGATTGATAGCTCTTTCTTGATTCTATGGGTGGTGGTGCATGGCCGTTCTTAGTTGGTGGAGTGATTTGTCTGGTTAATTCCGTTAACGAACGAGATCTTACCTTGCTAAATAGTTACGTGTAACTTCGTTTACGCGGGCAGCTTCTTAGAGGGACTTTGTGTGTATAACGCAAGGAAGTTTGAGGCAATAACAGGTCTGTGATGCCCTTAGATGTTCTGGGCTGCACGCGCGCTACACTGATGTGCTCAACGAG	Eukaryota	Alveolata	Dinoflagellata	Dinophyceae	Dinophysiales	Dinophysiaceae	Dinophysis	Dinophysis_sp.
AAAACTTACCAGGTCCAGACATAGTTATGATTGACAGATTGAAGATCTTTCTTAATTCTATGGGTGGTGGTGCATGGCCGTTCTTAGTTGGTGGAGTGATTTGTCTGGTTAATTCCGTTAACGAACGAGACCTCGACCTGCTAAATAGTTCGGCGAATCCTTCGGGATTCGTTCGTGACTTCTTAGAGGGACTATCGGTGTGTAGCCGATGGAAGTTCGAGGCAATAACAGGTCTGTGATGCCCTTAGATGTTCTGGGCCGCACGCGCGCTACACTGAGTACTTCATCGA	Eukaryota	Rhizaria	Cercozoa	Filosa-Thecofilosea	NA	NA	NA	NA
AAACCTTACCAGGTCCGGACATAGGAAGGATTGACAGATTGAGAGCTCTTTCTTGATTCTATGGGTGGTGGTGCATGGCCGTTCTTAGTTGGTGGAGTGATTTGTCTGGTTAATTCCGTTAACGAACGAGACCTTAACCTACTAACTGGCCGCCTGAGTGGCAACGCTCAGGAATAAGGCCTCTTAGAGGGACGATCTGTGATTAGCAGATGGAGGAATAAGGCAATAACAGGTCTGTGATGCCCTTAGATGTTCTGGGCCGCACGCGCGCTACAATGATGCAGGCAACG	Eukaryota	NA	NA	NA	NA	NA	NA	NA
AAAACTTACCAGGTCCAGACATAGTAAGGATTGACAGATTGAGAGCTCTTTCTTGATTCTATGGGTGGTGGTGCATGGCCGTTCTTAGTTGGTGGAGTGATTTGTCTGGTTAATTCCGTTAACGAACGAGACCCCCGCCTGCTAAATAGTTCGCTTAATGAATTTCATTTCGTAGAGCTTCTTAGAGGGACTTTGCGTGACTAACGCAAGGAAGTTGGGGGCAATAACAGGTCTGTGATGCCCTTAGATGTCCTGGGCCGCACGCGCGCTACACTGATGCATTCAACGAG	Eukaryota	Stramenopiles	Ochrophyta	Bolidophyceae	Parmales	Parmales_env_2	Parmales_env_2_X	Parmales_env_2_X_sp.
GAAACTTACCAGGTCCAGACATAGTGAGGATTGACAGATTGAGAGCTCTTTCTTGATTCTATGGGTGGTGGTGCATGGCCGTTCTTAGTTGGTGGAGTGATTTGTCTGGTTAATTCCGTTAACGAACGAGACCCCCGCCTGCTAACTAGTGATACGAATGCTTAGCATTGGTGTTCGCTTCTTAGAGGGACTTTTGGTGACTAACCAAAGGAAGTTGGGGGCAATAACAGGTCTGTGATGCCCTTAGATGTCCTGGGCCGCACGCGCGCTACACTGACACACGCAGCGAG	Eukaryota	Stramenopiles	Ochrophyta	Chrysophyceae	Chrysophyceae_X	Chrysophyceae_Clade-C	Uroglena	Uroglena_americana
GAAACTTACCAGGTCCAGACATAGTAAGGATTGACAGATTGAGAGCTCTTTCTTGATTCTATGGGTGGTGGTGCATGGCCGTTCTTAGTTGGTGGAGTGATTTGTCTGGTTAATTCCGTTAACGAACGAGACCTTAACCTACTAAATAGTTACACAAACTTTGGTTTGTGGATATACTTCTTAGAGGGACTATTCGTGCTAGTGAATGGAAGTTTGAGGCAATAACAGGTCTGTGATGCCCTTAGATGTTCTTGGCCGCACGCGCGCTACACTGATGAAAGCAACAAGTT	Eukaryota	Hacrobia	Katablepharidophyta	Katablepharidaceae	Katablepharidales	Katablepharidales_X	Katablepharis	Katablepharis_japonica
AAACCTTACCAGGTCCGGACATAGGAAGGATTGACAGATTGAGAGCTCTTTCTTGATTCTATGGGTGGTGGTGCATGGCCGTTCTTAGTTGGTGGAGTGATTTGTCTGGTTAATTCCGTTAACGAACGAGACCTTAACCTACTAACTGGCCGCCTGAGTGGCAACGCTCAGGATCAAGGCCTCTTAGGGGGACGATCTGTGACTAACAGATGGAAGCATAAGGCAATAACAGGTCTGTGATGCCCTTAGATGTTCTGGGCCGCACGCGCGCTACAATGATGCAGGCAACG	Eukaryota	NA	NA	NA	NA	NA	NA	NA
AAAACTTACCAGGTCCAGACATAGTTAGGATTGACAGGTTGAAGACCTTTCTTGATTCTATGGGTGGTGGTGCATGGCCGTTCTTAGTTGGTGGAGTGATTTGTCTGGTTAATTCCGTTAACGAACGAGACCTCGACCTGCTAAATAGTTCGGCGTATCTTAGGATACGTACGTGACTTCTTAGAGGGACTATCAGGAGAGTATCCGATGGAAGTTCGAGGCAATAACAGGTCTGTGATGCCCTTAGATGTTCTGGGCCGCACGCGCGCTACACTGATTCGTTCATCGAG	Eukaryota	Rhizaria	Cercozoa	Filosa-Thecofilosea	Filosa-Thecofilosea_X	Mataza-lineage	Mataza-lineage_X	Mataza-lineage_X_sp.
AAAACTCACCAGGTCCAGACATAGTAAGGATTGACAGATTGAGAGCTCTTTCATGATTCTATGGGTGGTGGTGCATGGCCGTTCTTAGTTGGTGGAGTGATTTGTCTGGTTAATTCCGATAACGAACGAGACCTTAACCTGCTAAATAGTTGCTCGAATTTTTATTCGGGTCAACTTCTTAGAGGGACTGACTACGTTTAGTAGTCGGAAGTTTGAGGCAATAACAGGTCTGTGATGCCCTTAGATGTTCTGGGCCGCACGCGCGCTACACTGATAAAGGCAGCGAGTAT	Eukaryota	Opisthokonta	Fungi	Cryptomycota	Cryptomycotina	Cryptomycotina_X	NA	NA
GAAACTTACCAGGTCCAGACATAGTGAGGATTGACAGATTGAGAGCTCTTTCTTGATTCTATGGGTGGTGGTGCATGGCCGTTCTTAGTTGGTGGAGTGATTTGTCTGGTTAATTCCGTTAACGAACGAGACCCCCGCCTGCTAAATAGTCATATTAATGCTTAGCATTGATGTTGGCTTCTTAGAGGGACTTTCGGTGACTAACCGAAGGAAGTTGGGGGCAATAACAGGTCTGTGATGCCCTTAGATGTCCTGGGCCGCACGCGCGCTACACTGACACACGCAGCGAG	Eukaryota	Stramenopiles	Ochrophyta	Chrysophyceae	Chrysophyceae_X	Chrysophyceae_Clade-C	Dinobryon	Dinobryon_pediforme
AAATCTGGCAGCATCTCACCCTACGGCTAGTCCAGACTTTATTTTTCCATCCTAGAAACCCTGACATTGATTTTAATGTTTAACCATGAACATACAGTACAAATTGCGGAACTCTATGACAACCCGTTGCAGGGGAGCTTGCAATTATTCTCCGTGAACCAGGAATTCCCAGTAGGTGCAAGTCATAAGCTTGCATCGATTACGTCCCTGCCCTTTGTGCACACCGCCCGTCTGCTGACTGACTGGAGGTTATCCGATCTCGTATGCCGTCTTCTGCTTGAAAAAAAAAA	Eukaryota	Opisthokonta	Metazoa	Arthropoda	Crustacea	Maxillopoda	NA	NA
AAAACTTACCAGGTCCAGACATAGTGAGGATTGACAGATTGATAGCTCTTTCTTGATTCTATGGGTGGTGGTGCATGGCCGTTCTTAGTTGGTGGAGTGATTTGTCTGGTTAATTCCGTTAACGAACGAGACCTTAGCCTACTAACTAGTCGAGCCAATCTACGATTGGCCGCGACTTCTTAGAGGGACTTTGTGGGCCAAACACAAGGAAGTTTGAGGCAATAACAGGTCTGTGATGCCCTTAGATGTCCTGGGCCGCACGCGTGCTACACTGACGCATACAGCGAGTA	Eukaryota	Alveolata	Ciliophora	Spirotrichea	Hypotrichia	Hypotrichia_X	Hypotrichia_XX	Hypotrichia_XX_sp.
AAAACTTACCAGGTCAAGACATGGGCGTGATTGACAGGCTAATGACTTTTCTCGATTCCATGGATGGTGGTGCATGGTCGCACTTAGTTGGTGCAGTGATTTGTCAGGTTTATTCCGGTAACGAACGAGACCTCGGCCTTGTAAATAGCTATGCTGCTTACAGGGACATTGGCGGCTACGCCAAGGAAGCTCGAGGCAATTGCAGATCTGGAATGCCCTTAGATGTCCTGGGTCGCACGCGTGCTACAATGACGCCACGCACGAGCTTGCATGATGAAAGTTATGCATAA	Eukaryota	Alveolata	Ciliophora	Ciliophora_X	Ciliophora_XX	Ciliophora_XXX	Mesodinium	Mesodinium_rubrum
GAACTTTACCAGATCCGGACAGGGTGAGGATTGACAGATTGAGTGTTCTTTCTCGATCCCCTGAATGGTGGTGCATGGCCGCTTTTGGTCGGTGGAGTGATTTGTTTGGTTGATTCCGTCAACGGACGAGATCCAAGCCGCCTAGTAGATGTCAAAATCATTCAAAGATAGCAATCTCTTGCTTGGCTTCGGCCGACGGGAGTTACCTTTGGTTGGCATCTTCTTTGCGGGATTCCTGGCTTTGCGTCAGGTGAGATTTTGGGCAACAGCAGGTCTGTGATGCTCCTCAA	Eukaryota	Excavata	Discoba	Euglenozoa	Kinetoplastida	Neobodonid	Neobodo	Neobodo_designis
AAAACTCACCAGGTCCGGACATAGTAAGGATTGACAGATTGAGAGCTCTTTCTTGATTCTGTGGGTGGTGGTGCATGGCCGTTCTTAGTTGGTGGAGTGATTTGTCTGGTTAATTCCGATAACGAACGAGACCTTAACCTGCTAACTAGTAGCATGTGTTTCGACACATGCCGACTTCTTAGAGGGACTGACTACGTTTAGTAGTCGGAAGTTTGAGGCAATAACAGGTCTGTGATGCCCTTAGATGTTCTGGGCTGCACGCGCGCTACACTGACAAAGTCAGCGAGTTT	Eukaryota	Opisthokonta	Fungi	Cryptomycota	Cryptomycotina	Cryptomycotina_X	Cryptomycotina_XX	Cryptomycotina_XX_sp.
AAAACTTACCAGGTCCAGACATAGTGAGGATTGACAGATTGAGAGCTCTTTCTTGATTCTATGGGTGGTGGTGCATGGCCGTTCTTAGTTGGTGGAGTGATTTGTCTGGTTAATTCCGTTAACGAACGAGACCCCTGCCTGCTAAATAATCCGCCGAATGCTTTTTGCATTGGGTAGGGTTTCTTAGAGGGACGTCCAAGATCAACTTGGAGGAGGATAGGGGCAATAACAGGTCTGTGATGCCCTTAGATGTCCTGGGCCGCACGCGCGCTACACTGATGCATTCAACG	Eukaryota	Stramenopiles	Ochrophyta	Bacillariophyta	Bacillariophyta_X	Polar-centric-Mediophyceae	Attheya	Attheya_septentrionalis
GAAACTTACCAGGTCAAGACATAAGTGGGATTGACAGATTGAGAGCTCTTTCTTGATTCTATGGGTGGTGGTGCATGGCCGTTCTTAGTTGGTGGAGTGATTTGTCTGGTTAATTCCGTTAACGAACGAGACCTTAACCTGCTAACTAGTCGTCTTGTGAACAACGGGATGGACTTCTTAGAGGGACTATGCGTTCAAGCGCATGGAAGTTTGAGGCAATAACAGGTCAGTGATGCCCTTAGATGTCCTGGGCCGCACGCGCGCTACATTGATACGTGCAACAAGTACAT	Eukaryota	Alveolata	Ciliophora	CONThreeP	CONThreeP_X	NA	NA	NA
AAAACTTACCAGGTCCAGACATAGTGAGGATTGACAGATTGAGAGCTCTTTCTTGATTCTATGGGTGGTGGTGCATGGCCGTTCTTAGTTGGTGGAGTGATTTGTCTGGTTAATTCCGTTAACGAACGAGACCCCTGCCTGCTAAATAGTTGGGTGAATGAATTTTCATTGACTACAGCTTCTTAGAGGGACGTGCGTTCTATTAGACGCAGGAAGATAGGGGCAATAACAGGTCTGTGATGCCCTTAGATGTCCTGGGCCGCACGCGCGCTACACTGATGCAATCAACG	Eukaryota	Stramenopiles	Ochrophyta	Bacillariophyta	Bacillariophyta_X	Araphid-pennate	Diatoma	Diatoma_tenuis
AAACCTTACCAGGTCCGGACATAGGAAGGATTGACAGATTGAGAGCTCTTTCTTGATTCTATGGGTGGTGGTGCATGGCCGTTCTTAGTTGGTGGAGTGATTTGTCTGGTTAATTCCGTTAACGAACGAGACCTTAACCTACTAACTGGCCGCCTGAGTGGCAACGCTCAGGATCAAGGCCTCTTAGGGGGACGATCTGTGACTAACAGATGGAAGCATAAGGCAATAACAGGTCTGTGATGCCCTTAGATGTTCTGTGCCGCACGCGCGCTACAATGATGCAGGCAACG	Eukaryota	NA	NA	NA	NA	NA	NA	NA
AAATCTCACCAGGCCCGGACACCAGAAGGATTGACAGATTGATAGCTCTTTCTTGATTTGGTGGGTGGTGGTGCATGGCCGTTCTTAGTTGGTGGAGTGATTTGTCTGGTTAATTCCGATAACGAACGAGACTCTGTCCTGCTAAATAGATGCAACCTTTCTTTTGGGTTGCAATTTCTTCTTAGAGGGACTGGCGATTATTAGTCGCACGAGATTGAGCAATAACAGGTCTGTGATGCCCTTAGATGTTCTTGGCCGCACACGCGCTACACTGAATTGATCAGCTAGTT	Eukaryota	Opisthokonta	Metazoa	Arthropoda	Crustacea	Maxillopoda	Limnocalanus	Limnocalanus_macrurus
AAAACTTACCAGGTCCAGACATAGTGAGGATTGACAGATTGAGAGCTCTTTCTTGATTCTATGGGTGGTGGTGCATGGCCGTTCTTAGTTGGTGGGTTGCCTTGTCAGGTTGATTCCGGTAACGAACGAGACCTCAGCCTACTAAATAGTCACGGTCGCTCCGGCGGCTGGCGGACTTCTTAGAGGGACTAATGGCGACTAGCCATTGGAAGCATGAGGCAATAACAGGTCTGTGATGCCCTTAGATGTTCTTGGCCGCACGCGCGCTACACTGATGCATTCAACGAGCC	Eukaryota	Archaeplastida	Chlorophyta	Trebouxiophyceae	Chlorellales	Chlorellales_X	NA	NA
TACGGAGGGTCCGAGCGTTAATCGGAATTACTGGGCGTAAAGCGTGCGCAGGCGGTTTGTTAAGCGAGATGTGAAAGCCCCGGGCTCAACCTGGGAATTGCATTTCGAACTGGCGAACTAGAGTCTTGTAGAGGGGGGTAGAATTCCAGGTGTAGCGGTGAAATGCGTAGAGATCTGGAGGAATACCGGTGGCGAAGGCGGCCCCCTGGACAAAGACTGACGCTCAGGCACGAAAGCGTGGGGAGCAAACAGGATTAGAAACCCTAGTAGTCCGGCTGACTGACTAGGCT	Eukaryota	NA	NA	NA	NA	NA	NA	NA
AAAACTTACCAGGTCAAGACATGGGCGTGATTGACAGGCTAATGACTTTTCTCGATTCCATGGATGGTGGTGCATGGTCGCACTTAGTTGGTGCAGTGATTTGTCAGGTTTATTCCGGTAACGAACGAGACCTCGGCCTTGTAAATAGCTATGCTGCTTACAGGGACATTGGCGGCTACGCCAAGGAAGCTCGAGGCAATTGCAGATCTGGAATGCCCTTAGATGTCCTGGGTCGCACGCGTGCTACAATGACGCCACGACCGAGCTTGCATGATGAAAGTTATGCATAA	Eukaryota	Alveolata	Ciliophora	Ciliophora_X	Ciliophora_XX	Ciliophora_XXX	Mesodinium	Mesodinium_rubrum
AAAACTTACCAGGTCAAGACATGGGCGTGATTGACAGGCTAATGACTTTTCTCGATTCCATGGATGGTGGTGCATGGTCGCACTTAGTTGGTGCAGTGATTTGTCAGGTTTATTCCGGTAACGAACGAGACCTCGGCCTTGTAAATAGCTATGCTGCTTACAGGGACATTGGCGGCTACGCCCAGGAAGCTCGAGGCAATTGCAGATCTGGAATGCCCTTAGATGTCCTGGGTCGCACGCGTGCTACAATGACGCCACGAACGAGCTTGCATGATGAAAGTTATGCATAA	Eukaryota	Alveolata	Ciliophora	Ciliophora_X	Ciliophora_XX	Ciliophora_XXX	Mesodinium	NA
AAATCTCACCAGGCCCGGACACCAGAAGGATTGACAGATTGATAGCTCTTTCTTGATTTGGTGGGTGGTGGTGCATGGCCGTTCTTAGTTGGTGGAGTGATTTGTCTGGTTAATTCCGATAACGAACGAGACTCTGTCCTGTTAAATAGATCCAACCTAGTCGTAGGGTTGGAATTTCTTCTTAGAGGGACTGGTGATTATTAGTCACACGAGATTGAGCAATAACAGGTCTGTGATGCCCTTAGATGTTCTGGGCCGCACACGCGCTACACTGAAGTGATCCGCTAGTT	Eukaryota	Opisthokonta	Metazoa	Arthropoda	Crustacea	Maxillopoda	Eurytemora	Eurytemora_affinis
AAATCTCACCCGGCCCGGACACTGTAAGGATTGACAGATTGAGAGCTCTTTCTTGATTCGGTGGGTGGTGGTGCATGGCCGTTCTTAGTTGGTGGAGCGATTTGTCTGGTTAATTCCGATAACGAACGAGACTCTAACCTGCTAAATAGTACGCCGATCTTTTGTCGGCGCGTACTTCTTAGAGGGACAGGTAGCGGTTAGCTACACGAAATTGAGCAATAACAGGTCTGTGATGCCCTTAGATGTTCGGGGCCGCACGCGCGCTACACTGAAGGGATAAGCGTGTTTTT	Eukaryota	Opisthokonta	Metazoa	Rotifera	Rotifera_X	Rotifera_XX	NA	NA
AAAACTTACCAGGTCAAGACATGGGCGTGATTGACAGGCTAATGACTTTTCTCGATTCCATGGATGGTGGTGCATGGTCGCACTTAGTTGGTGCAGTGATTTGTCAGGTTTATTCCGGTAACGAACGAGACCTCGGCCTTGTAAATAGCTATGCTGCTTACAGGGACATTGGCGGCTACGCCAAGGAAGCTCGAGGCAATTGCAGATCTGGAATGCCCTTAGATGTCCTGGGTCGCACGCGTGCTACAATGACGCCACGAACGAGCTTGCATGATGACAGTTATGCATAA	Eukaryota	Alveolata	Ciliophora	Ciliophora_X	Ciliophora_XX	Ciliophora_XXX	Mesodinium	NA
AAACCTTACTAGGGTAAGACATTGGTATGATTGACAGACTACTTGATCTTTCTTGATTTGGTGGGTGGTGGTGCATGGCCGATCTTAGTTGGTGGGGTGACCCGTCTGGTTAATTTCGATAACGAACGAGATCCGAGCTGTTTAGTTGGCCGTGCCAGGTTCGCCAGGTATGTGTCTCCTATATGGACTGTCAGTTTGAGGCTGAAGGAAGTTTCGGGCTAAATCAGGTCTGTGATGCCCTTAGACACTCTAGGCGGCACGCGCGCTACAATGGGCGGAAGAACGTGTTA	Eukaryota	Alveolata	Apicomplexa	Gregarinomorphea	Eugregarinorida	Cephaloidophoridae	Cephaloidophora	Cephaloidophora_sp.
AAAACTCACCAGGTCCAGACATGGGAAGGATTGACAGATTGATAGCTCTTTCTTGATTCTATGGGTGGTGGTGCATGGCCGTTCTTAGTTGGTGGAGTGATTTGTCTGGTTAATTCCGTTAACGAACGAGACCGCCGCCTGCTAAATAGTTCTACTAATGGTTTTTCATTGGTAAGAGCTTCTTAGAGGGACGTTCATTCTACAATATGAAGGAAGATGGCGGCAATAACAGGTCTGTGATGCCCTTAGATGTCCTGGGCCGCACGCGCGTTACACTGATGCACTCCACG	Eukaryota	Stramenopiles	Ochrophyta	Bacillariophyta	Bacillariophyta_X	Polar-centric-Mediophyceae	NA	NA
AAAACTTACCAGGTCAAGACATGGGCGTGATTGACAGGCTAATGACTTTTCTCGATTCCATGGATGGTGGTGCATGGTCGCACTTAGTTGGTGCAGTGATTTGTCAGGTTTATTCCGGTAACGAACGAGACCTCGGCCTTGTAAATAGCTATGCTGCTTACAGGGACATTGGCGGCTACGCCAAGGAAGCTCGAGGCAATTGCAGATCTGGAATGCCCTTAGATGTCCTGGGTCGCACGCGTTCTACAATGACGCCACGAACGAGCTTGCATGATGAAAGTTATGCATAA	Eukaryota	Alveolata	Ciliophora	Ciliophora_X	Ciliophora_XX	Ciliophora_XXX	Mesodinium	Mesodinium_rubrum
AAAACTTACCAGGTCAAGACATGGGCGTGATTGACAGGCTAATGACTTTTCTCGATTCCATGGAGGGTGGTGCATGGTCGCACTTAGTTGGTGCAGTGATTTGTCAGGTTTATTCCGGTAACGAACGAGACCTCGGCCTTGTAAATAGCTATGCTGCTTACAGGGACATTGGCGGCTACGCCAAGGAAGCTCGAGGCAATTGCAGATCTGGAATGCCCTTAGATGTCCTGGGTCGCACGCGTGCTACAATGACGCCACGAACGAGCTTGCATGATGAAAGTTATGCATAA	Eukaryota	Alveolata	Ciliophora	Ciliophora_X	Ciliophora_XX	Ciliophora_XXX	Mesodinium	Mesodinium_rubrum
AAAACTTACCAGGTCAAGACATGGGCGTGATTGACAGGCTAATGACTTTTCTCGATTCCATGGATGGTGGTGCATGGTCGCACTTAGTTGGTGCAGTGATTTGTCAGGTTTATTCCGGTAACGAACGAGACCTCGGCCTTGTAAATAGCTATGCTGCTTACAGGGACATTGGCGGCTACGCCAAGGAAGCTCGAGGCAATTGCAGATCTGGAATGCCCTTAGATGTCCTGGGTCGCACGCGTGCTACAATTACGCCACGAACGAGCTTGCGTGATGAAAGTTACGCATAA	Eukaryota	Alveolata	Ciliophora	Ciliophora_X	Ciliophora_XX	Ciliophora_XXX	Mesodinium	Mesodinium_rubrum
AAAACTTACCAGGTCAAGACATGGGCGTGATTGACAGGCTAATGACTTTTCTCGATTCCATGGATGGTGGTGCATGGTCGCACTTAGTTGGTGCAGTGATTTGTCAGGTTTATTCCGGTAACGAACGAGACCTCGGCCTTGTAAATAGCTATGCTGCTTACAGGGACATTGGCGGCTACGCCAAGGAAGCTCGAGGCAATTGCAGATCTGGAATGCCCTTAGATGTCCTGGGTCGCACGCGTGCTACCATGACGCCACGAACGAGCTTGCATGATGAAAGTTATGCATAA	Eukaryota	Alveolata	Ciliophora	Ciliophora_X	Ciliophora_XX	Ciliophora_XXX	Mesodinium	Mesodinium_rubrum
GAAACTTACCAGGTCCAGACATAGTAAGGATTGACAGATTGATAGCTCTTTCTTGATTCTATGGGTGGTGGTGCATGGCCGTTCTTAGTTGGTGGAGTGATTTGTCTGGTTAATTCCGTTAACGAACGAGACCTTAACCTGCTAAATAGTTACATGTAACCTCGGTTACATGGGCAACTTCTTAGAGGGACTTTGCGTGTCTAACGCAAGGAAGTTTGAGGCAATAACAGGTCTGTGATGCCCTTAGCTGTCCTGGGCTGCACGCGCGCTACACTGATGCGCTCAACGAG	Eukaryota	Alveolata	Dinoflagellata	Dinophyceae	Dinophyceae_X	Tovelliaceae	Woloszynskia	Woloszynskia_halophila

## Sheet: Coordinates
x	y	sample
22.06777778	64.71333333	A13
23.24361111	65.1666666	A5
19.81722222	63.5	B3
18.55888888	63.0	C14
18.23333333	61.18361111	C24
18.95388888	62.65444444	C3
18.27055555	62.87333333	GA1
22.38111111	65.81222222	RA1
22.4552777	65.73916666	RA2
